# Supplementary material
Source: publisher figshare collection journal article supplement (https://acs.figshare.com/ndownloader/files/3809176)
Supplement: Supplementary file 1 [file 3809176]

 
data_6-I-9-P

_audit_creation_method           SHELXL-2014/7
_shelx_SHELXL_version_number     2014/7
_chemical_name_systematic        ?
_chemical_name_common            ?
_chemical_formula_moiety         'C20 H25 B9 I P'
_chemical_formula_sum            'C20 H25 B9 I P'
_chemical_melting_point          ?

_exptl_crystal_description       Needle
_exptl_crystal_colour            Colourless
_diffrn_ambient_temperature      100(2)
_chemical_formula_weight         520.56

loop_
_atom_type_symbol
_atom_type_description
_atom_type_scat_dispersion_real
_atom_type_scat_dispersion_imag
_atom_type_scat_source
C C 0.0181 0.0091 'International Tables Vol C Tables 4.2.6.8 and 6.1.1.4'
H H 0.0000 0.0000 'International Tables Vol C Tables 4.2.6.8 and 6.1.1.4'
B B 0.0090 0.0039 'International Tables Vol C Tables 4.2.6.8 and 6.1.1.4'
P P 0.2955 0.4335 'International Tables Vol C Tables 4.2.6.8 and 6.1.1.4'
I I -0.3257 6.8362 'International Tables Vol C Tables 4.2.6.8 and 6.1.1.4'

_space_group_crystal_system      monoclinic
_space_group_IT_number           14
_space_group_name_H-M_alt        'P 21/c'
_space_group_name_Hall           '-P 2ybc'

_shelx_space_group_comment       
;
The symmetry employed for this shelxl refinement is uniquely defined
by the following loop, which should always be used as a source of
symmetry information in preference to the above space-group names.
They are only intended as comments.
;

loop_
_space_group_symop_operation_xyz
'x, y, z'
'-x, y+1/2, -z+1/2'
'-x, -y, -z'
'x, -y-1/2, z-1/2'

_cell_length_a                   16.2403(4)
_cell_length_b                   22.5110(5)
_cell_length_c                   13.1895(3)
_cell_angle_alpha                90
_cell_angle_beta                 93.3890(10)
_cell_angle_gamma                90
_cell_volume                     4813.46(19)
_cell_formula_units_Z            8
_cell_measurement_temperature    100(2)
_cell_measurement_reflns_used    ?
_cell_measurement_theta_min      ?
_cell_measurement_theta_max      ?
_exptl_crystal_density_meas      ?
_exptl_crystal_density_method    ?
_exptl_crystal_density_diffrn    1.437
_exptl_crystal_F_000             2064
_exptl_transmission_factor_min   ?
_exptl_transmission_factor_max   ?
_exptl_crystal_size_max          0.500
_exptl_crystal_size_mid          0.120
_exptl_crystal_size_min          0.020
_exptl_absorpt_coefficient_mu    11.097
_shelx_estimated_absorpt_T_min   0.072
_shelx_estimated_absorpt_T_max   0.809
_exptl_absorpt_correction_type   multi-scan
_exptl_absorpt_correction_T_min  0.10
_exptl_absorpt_correction_T_max  0.81
_exptl_absorpt_process_details   
;
 Data were corrected for decay and absorption using the program SADABS 
 (Sheldrick, G. M. (2003). SADABS. Version 2.10. University of
 G\"ottingen, Germany).
;
_exptl_absorpt_special_details   ?
_diffrn_radiation_probe          ?
_diffrn_radiation_type           CuK\a
_diffrn_radiation_wavelength     1.54178
_diffrn_source                   'Incoatec Cu microfocus tube'

_diffrn_measurement_device_type  'Bruker APEXII CCD area detector'
_diffrn_measurement_method       'omega and phi scans'
_diffrn_detector_area_resol_mean ?
_diffrn_reflns_number            50559
_diffrn_reflns_av_unetI/netI     0.0175
_diffrn_reflns_av_R_equivalents  0.0260
_diffrn_reflns_limit_h_min       -16
_diffrn_reflns_limit_h_max       18
_diffrn_reflns_limit_k_min       -27
_diffrn_reflns_limit_k_max       25
_diffrn_reflns_limit_l_min       -16
_diffrn_reflns_limit_l_max       13
_diffrn_reflns_theta_min         2.725
_diffrn_reflns_theta_max         72.166
_diffrn_reflns_theta_full        67.679
_diffrn_measured_fraction_theta_max 0.962
_diffrn_measured_fraction_theta_full 0.984
_diffrn_reflns_Laue_measured_fraction_max 0.962
_diffrn_reflns_Laue_measured_fraction_full 0.984
_diffrn_reflns_point_group_measured_fraction_max 0.962
_diffrn_reflns_point_group_measured_fraction_full 0.984
_reflns_number_total             9134
_reflns_number_gt                8858
_reflns_threshold_expression     'I > 2\s(I)'
_reflns_Friedel_coverage         0.000
_reflns_Friedel_fraction_max     .
_reflns_Friedel_fraction_full    .

_reflns_special_details          
;
 Reflections were merged by SHELXL according to the crystal
 class for the calculation of statistics and refinement.
 
 _reflns_Friedel_fraction is defined as the number of unique
 Friedel pairs measured divided by the number that would be
 possible theoretically, ignoring centric projections and
 systematic absences.
;

_computing_data_collection       'APEX2 (Bruker AXS, 2008)'
_computing_cell_refinement       'APEX2 (Bruker AXS, 2008)'
_computing_data_reduction        'APEX2 (Bruker AXS, 2008)'
_computing_structure_solution    'SHELXS-2013 (Sheldrick, 2013)'
_computing_structure_refinement  'SHELXL-2013 (Sheldrick, 2013)'
_computing_molecular_graphics    'X-SEED, Barbour, 2001'
_computing_publication_material  'CIFTAB (Sheldrick, 2013)'
_refine_special_details          
;
 Iodine positions on both molecules have satellites which were 
 modelled as partially occupied I positions, perhaps resulting 
 from "whole body disorder" and showing only the I positions.
 I occupancies were refined using free variables such that the 
 total I occupancy was 1.0 for each molecule.
;
_refine_ls_structure_factor_coef Fsqd
_refine_ls_matrix_type           full
_refine_ls_weighting_scheme      calc
_refine_ls_weighting_details     
'w=1/[\s^2^(Fo^2^)+(0.0438P)^2^+9.5140P] where P=(Fo^2^+2Fc^2^)/3'
_atom_sites_solution_primary     ?
_atom_sites_solution_secondary   ?
_atom_sites_solution_hydrogens   mixed
_refine_ls_hydrogen_treatment    mixed
_refine_ls_extinction_method     none
_refine_ls_extinction_coef       .
_refine_ls_number_reflns         9134
_refine_ls_number_parameters     587
_refine_ls_number_restraints     0
_refine_ls_R_factor_all          0.0359
_refine_ls_R_factor_gt           0.0348
_refine_ls_wR_factor_ref         0.0929
_refine_ls_wR_factor_gt          0.0921
_refine_ls_goodness_of_fit_ref   1.053
_refine_ls_restrained_S_all      1.053
_refine_ls_shift/su_max          0.003
_refine_ls_shift/su_mean         0.000

loop_
_atom_site_label
_atom_site_type_symbol
_atom_site_fract_x
_atom_site_fract_y
_atom_site_fract_z
_atom_site_U_iso_or_equiv
_atom_site_adp_type
_atom_site_occupancy
_atom_site_site_symmetry_order
_atom_site_calc_flag
_atom_site_refinement_flags_posn
_atom_site_refinement_flags_adp
_atom_site_refinement_flags_occupancy
_atom_site_disorder_assembly
_atom_site_disorder_group
I1A I 0.08468(3) 0.42229(2) 0.80074(4) 0.0341(3) Uani 0.830(7) 1 d . . P A 1
I1B I 0.61040(2) 0.09214(2) 0.40434(3) 0.04021(14) Uani 0.948(2) 1 d . . P B 1
P1A P 0.03753(4) 0.13605(3) 0.78687(5) 0.02003(15) Uani 1 1 d . . . . .
P1B P 0.53381(4) 0.36650(3) 0.29158(5) 0.02074(15) Uani 1 1 d . . . . .
C7A C 0.18127(18) 0.25922(13) 0.6201(2) 0.0256(6) Uani 1 1 d . . . . .
H7A H 0.1794 0.2447 0.5387 0.031 Uiso 1 1 calc R U . . .
C8A C 0.17117(17) 0.20480(13) 0.6905(2) 0.0234(6) Uani 1 1 d . . . . .
H8A H 0.1604 0.1644 0.6419 0.028 Uiso 1 1 calc R U . . .
C12A C 0.11018(18) 0.07470(12) 0.7998(2) 0.0231(6) Uani 1 1 d . . . . .
C13A C 0.16828(19) 0.07458(13) 0.8819(2) 0.0280(6) Uani 1 1 d . . . . .
H13A H 0.1669 0.1047 0.9322 0.034 Uiso 1 1 calc R U . . .
C14A C 0.2282(2) 0.03052(15) 0.8906(3) 0.0335(7) Uani 1 1 d . . . . .
H14A H 0.2682 0.0310 0.9461 0.040 Uiso 1 1 calc R U . . .
C15A C 0.2298(2) -0.01383(15) 0.8188(3) 0.0351(7) Uani 1 1 d . . . . .
H15A H 0.2713 -0.0435 0.8243 0.042 Uiso 1 1 calc R U . . .
C16A C 0.1714(2) -0.01516(14) 0.7392(3) 0.0337(7) Uani 1 1 d . . . . .
H16A H 0.1719 -0.0465 0.6911 0.040 Uiso 1 1 calc R U . . .
C17A C 0.11082(19) 0.02931(13) 0.7279(2) 0.0282(6) Uani 1 1 d . . . . .
H17A H 0.0710 0.0285 0.6723 0.034 Uiso 1 1 calc R U . . .
C18A C -0.03565(18) 0.12142(13) 0.6812(2) 0.0244(6) Uani 1 1 d . . . . .
C19A C -0.0176(2) 0.13999(16) 0.5839(2) 0.0343(7) Uani 1 1 d . . . . .
H19A H 0.0336 0.1586 0.5731 0.041 Uiso 1 1 calc R U . . .
C20A C -0.0749(2) 0.13107(17) 0.5030(3) 0.0389(8) Uani 1 1 d . . . . .
H20A H -0.0629 0.1436 0.4367 0.047 Uiso 1 1 calc R U . . .
C21A C -0.1500(2) 0.10381(16) 0.5191(3) 0.0357(7) Uani 1 1 d . . . . .
H21A H -0.1891 0.0978 0.4636 0.043 Uiso 1 1 calc R U . . .
C22A C -0.1680(2) 0.08534(14) 0.6156(3) 0.0330(7) Uani 1 1 d . . . . .
H22A H -0.2192 0.0667 0.6262 0.040 Uiso 1 1 calc R U . . .
C23A C -0.1109(2) 0.09423(13) 0.6966(2) 0.0286(6) Uani 1 1 d . . . . .
H23A H -0.1232 0.0817 0.7628 0.034 Uiso 1 1 calc R U . . .
C24A C -0.02046(17) 0.13580(13) 0.8991(2) 0.0212(5) Uani 1 1 d . . . . .
C25A C -0.0290(2) 0.08335(14) 0.9540(2) 0.0293(7) Uani 1 1 d . . . . .
H25A H -0.0041 0.0476 0.9328 0.035 Uiso 1 1 calc R U . . .
C26A C -0.0742(2) 0.08415(15) 1.0400(3) 0.0358(7) Uani 1 1 d . . . . .
H26A H -0.0802 0.0488 1.0783 0.043 Uiso 1 1 calc R U . . .
C27A C -0.1108(2) 0.13637(16) 1.0703(2) 0.0337(7) Uani 1 1 d . . . . .
H27A H -0.1414 0.1366 1.1296 0.040 Uiso 1 1 calc R U . . .
C28A C -0.10328(18) 0.18761(14) 1.0157(2) 0.0284(6) Uani 1 1 d . . . . .
H28A H -0.1289 0.2231 1.0370 0.034 Uiso 1 1 calc R U . . .
C29A C -0.05830(17) 0.18791(13) 0.9294(2) 0.0239(6) Uani 1 1 d . . . . .
H29A H -0.0534 0.2234 0.8912 0.029 Uiso 1 1 calc R U . . .
C7B C 0.69716(19) 0.23313(15) 0.1707(2) 0.0316(7) Uani 1 1 d . . . . .
H7B H 0.6979 0.2367 0.0861 0.038 Uiso 1 1 calc R U . . .
C8B C 0.67767(18) 0.29445(14) 0.2168(2) 0.0276(6) Uani 1 1 d . . . . .
H8B H 0.6655 0.3269 0.1533 0.033 Uiso 1 1 calc R U . . .
C12B C 0.48776(17) 0.37209(13) 0.4128(2) 0.0237(6) Uani 1 1 d . . . . .
C13B C 0.5036(2) 0.41848(14) 0.4809(2) 0.0289(6) Uani 1 1 d . . . . .
H13B H 0.5389 0.4501 0.4637 0.035 Uiso 1 1 calc R U . . .
C14B C 0.4675(2) 0.41863(15) 0.5744(2) 0.0340(7) Uani 1 1 d . . . . .
H14B H 0.4784 0.4502 0.6210 0.041 Uiso 1 1 calc R U . . .
C15B C 0.4161(2) 0.37272(15) 0.5988(2) 0.0331(7) Uani 1 1 d . . . . .
H15B H 0.3922 0.3726 0.6629 0.040 Uiso 1 1 calc R U . . .
C16B C 0.3990(2) 0.32701(15) 0.5311(3) 0.0343(7) Uani 1 1 d . . . . .
H16B H 0.3626 0.2960 0.5481 0.041 Uiso 1 1 calc R U . . .
C17B C 0.43483(19) 0.32622(15) 0.4380(2) 0.0315(7) Uani 1 1 d . . . . .
H17B H 0.4234 0.2946 0.3917 0.038 Uiso 1 1 calc R U . . .
C18B C 0.44900(17) 0.36806(12) 0.1967(2) 0.0215(5) Uani 1 1 d . . . . .
C19B C 0.45476(18) 0.33869(13) 0.1050(2) 0.0263(6) Uani 1 1 d . . . . .
H19B H 0.5011 0.3143 0.0941 0.032 Uiso 1 1 calc R U . . .
C20B C 0.3924(2) 0.34518(14) 0.0293(2) 0.0315(7) Uani 1 1 d . . . . .
H20B H 0.3956 0.3246 -0.0333 0.038 Uiso 1 1 calc R U . . .
C21B C 0.32549(19) 0.38158(14) 0.0448(2) 0.0302(6) Uani 1 1 d . . . . .
H21B H 0.2833 0.3863 -0.0077 0.036 Uiso 1 1 calc R U . . .
C22B C 0.31976(19) 0.41095(14) 0.1358(3) 0.0307(7) Uani 1 1 d . . . . .
H22B H 0.2738 0.4359 0.1461 0.037 Uiso 1 1 calc R U . . .
C23B C 0.38098(18) 0.40409(13) 0.2122(2) 0.0274(6) Uani 1 1 d . . . . .
H23B H 0.3768 0.4239 0.2753 0.033 Uiso 1 1 calc R U . . .
C24B C 0.59264(18) 0.43346(13) 0.2687(2) 0.0252(6) Uani 1 1 d . . . . .
C25B C 0.5703(2) 0.46930(14) 0.1854(2) 0.0322(7) Uani 1 1 d . . . . .
H25B H 0.5228 0.4596 0.1430 0.039 Uiso 1 1 calc R U . . .
C26B C 0.6166(2) 0.51926(15) 0.1636(3) 0.0377(8) Uani 1 1 d . . . . .
H26B H 0.6007 0.5435 0.1068 0.045 Uiso 1 1 calc R U . . .
C27B C 0.6853(2) 0.53326(15) 0.2241(3) 0.0349(7) Uani 1 1 d . . . . .
H27B H 0.7173 0.5671 0.2087 0.042 Uiso 1 1 calc R U . . .
C28B C 0.7083(2) 0.49875(15) 0.3072(3) 0.0345(7) Uani 1 1 d . . . . .
H28B H 0.7560 0.5090 0.3488 0.041 Uiso 1 1 calc R U . . .
C29B C 0.66211(19) 0.44872(14) 0.3307(2) 0.0304(7) Uani 1 1 d . . . . .
H29B H 0.6778 0.4253 0.3885 0.036 Uiso 1 1 calc R U . . .
B1A B 0.2121(2) 0.29888(16) 0.8140(3) 0.0278(7) Uani 1 1 d . . . . .
H1A H 0.2529 0.3222 0.8727 0.033 Uiso 1 1 calc R U . . .
B5A B 0.1138(2) 0.26947(15) 0.8425(2) 0.0237(6) Uani 1 1 d . . . . .
H5A H 0.0909 0.2725 0.9208 0.028 Uiso 1 1 calc R U . . .
B4A B 0.1955(2) 0.22097(16) 0.8171(3) 0.0257(7) Uani 1 1 d . . . . .
H4A H 0.2262 0.1915 0.8764 0.031 Uiso 1 1 calc R U . . .
B3A B 0.2520(2) 0.25260(15) 0.7197(3) 0.0263(7) Uani 1 1 d . . . . .
H3A H 0.3193 0.2432 0.7144 0.032 Uiso 1 1 calc R U . . .
B2A B 0.2063(2) 0.32135(15) 0.6861(3) 0.0268(7) Uani 1 1 d . . . . .
H2A H 0.2444 0.3593 0.6603 0.032 Uiso 1 1 calc R U . . .
B6A B 0.1194(2) 0.33183(14) 0.7579(3) 0.0257(7) Uani 1 1 d . . . . .
B9A B 0.09458(19) 0.20842(14) 0.7624(2) 0.0202(6) Uani 1 1 d . . . . .
B10A B 0.0425(2) 0.27676(14) 0.7336(2) 0.0231(6) Uani 1 1 d . . . . .
H10A H -0.0259 0.2747 0.7171 0.028 Uiso 1 1 calc R U . . .
B11A B 0.1053(2) 0.30614(16) 0.6299(3) 0.0281(7) Uani 1 1 d . . . . .
H11A H 0.0686 0.3164 0.5574 0.034 Uiso 1 1 calc R U . . .
B1B B 0.7212(2) 0.22104(15) 0.3770(3) 0.0272(7) Uani 1 1 d . . . . .
H1B H 0.7607 0.2084 0.4461 0.033 Uiso 1 1 calc R U . . .
B2B B 0.7257(2) 0.18251(16) 0.2619(3) 0.0294(7) Uani 1 1 d . . . . .
H2B H 0.7695 0.1445 0.2552 0.035 Uiso 1 1 calc R U . . .
B3B B 0.7619(2) 0.25594(16) 0.2691(3) 0.0318(8) Uani 1 1 d . . . . .
H3B H 0.8285 0.2679 0.2640 0.038 Uiso 1 1 calc R U . . .
B4B B 0.6965(2) 0.29602(16) 0.3481(3) 0.0297(7) Uani 1 1 d . . . . .
H4B H 0.7208 0.3338 0.3963 0.036 Uiso 1 1 calc R U . . .
B5B B 0.6185(2) 0.24739(15) 0.3860(3) 0.0264(7) Uani 1 1 d . . . . .
H5B H 0.5913 0.2528 0.4615 0.032 Uiso 1 1 calc R U . . .
B6B B 0.6356(2) 0.17650(15) 0.3288(3) 0.0262(7) Uani 1 1 d . . . . .
B9B B 0.59788(19) 0.29595(15) 0.2832(2) 0.0227(6) Uani 1 1 d . . . . .
B10B B 0.5542(2) 0.22300(15) 0.2782(3) 0.0266(7) Uani 1 1 d . . . . .
H10B H 0.4866 0.2193 0.2568 0.032 Uiso 1 1 calc R U . . .
B11B B 0.6260(2) 0.18464(17) 0.1928(3) 0.0318(8) Uani 1 1 d . . . . .
H11B H 0.5949 0.1636 0.1238 0.038 Uiso 1 1 calc R U . . .
I1A' I 0.0978(7) 0.4158(4) 0.8423(19) 0.143(4) Uani 0.170(7) 1 d . . P A 2
I1B' I 0.5870(8) 0.0870(5) 0.3401(18) 0.135(6) Uani 0.052(2) 1 d . . P B 2
H10D H 0.567(2) 0.2235(17) 0.192(3) 0.039(10) Uiso 1 1 d . . . . .
H10C H 0.050(2) 0.2634(16) 0.643(3) 0.033(9) Uiso 1 1 d . . . . .

loop_
_atom_site_aniso_label
_atom_site_aniso_U_11
_atom_site_aniso_U_22
_atom_site_aniso_U_33
_atom_site_aniso_U_23
_atom_site_aniso_U_13
_atom_site_aniso_U_12
I1A 0.0284(2) 0.0153(2) 0.0602(5) -0.00474(15) 0.01659(19) 0.00014(11)
I1B 0.03230(19) 0.02337(13) 0.0670(3) 0.01174(11) 0.02034(13) 0.00136(9)
P1A 0.0217(3) 0.0175(3) 0.0217(3) -0.0006(2) 0.0080(3) -0.0020(2)
P1B 0.0174(3) 0.0201(3) 0.0254(3) -0.0014(3) 0.0068(3) -0.0001(2)
C7A 0.0233(15) 0.0284(15) 0.0254(14) 0.0001(11) 0.0052(11) -0.0055(11)
C8A 0.0219(14) 0.0242(14) 0.0248(14) -0.0044(11) 0.0074(11) -0.0039(11)
C12A 0.0253(15) 0.0161(13) 0.0292(14) 0.0006(11) 0.0130(11) -0.0023(10)
C13A 0.0304(16) 0.0230(15) 0.0310(15) 0.0007(12) 0.0057(12) 0.0005(12)
C14A 0.0326(17) 0.0301(17) 0.0383(17) 0.0089(13) 0.0056(13) 0.0007(13)
C15A 0.0318(17) 0.0268(16) 0.0484(19) 0.0076(14) 0.0167(14) 0.0039(13)
C16A 0.0403(19) 0.0214(15) 0.0414(18) -0.0041(13) 0.0194(14) 0.0000(13)
C17A 0.0312(16) 0.0232(15) 0.0314(15) -0.0029(12) 0.0102(12) -0.0042(12)
C18A 0.0258(15) 0.0225(14) 0.0254(14) -0.0021(11) 0.0048(11) -0.0016(11)
C19A 0.0346(18) 0.0408(19) 0.0281(15) -0.0006(13) 0.0054(13) -0.0085(14)
C20A 0.044(2) 0.047(2) 0.0259(16) -0.0018(14) 0.0020(13) -0.0042(16)
C21A 0.0360(18) 0.0383(18) 0.0322(17) -0.0075(14) -0.0034(13) 0.0050(14)
C22A 0.0286(17) 0.0301(17) 0.0402(18) -0.0032(13) -0.0003(13) -0.0025(13)
C23A 0.0313(16) 0.0246(15) 0.0303(15) -0.0008(12) 0.0055(12) -0.0044(12)
C24A 0.0195(13) 0.0234(14) 0.0213(13) 0.0001(10) 0.0056(10) -0.0023(10)
C25A 0.0314(17) 0.0233(15) 0.0344(16) 0.0008(12) 0.0128(13) -0.0017(12)
C26A 0.0403(19) 0.0305(17) 0.0385(18) 0.0090(13) 0.0184(14) -0.0006(14)
C27A 0.0304(17) 0.0407(19) 0.0316(16) 0.0032(14) 0.0154(13) -0.0004(13)
C28A 0.0217(15) 0.0344(17) 0.0300(15) -0.0029(12) 0.0087(11) 0.0047(12)
C29A 0.0201(14) 0.0269(15) 0.0252(14) 0.0027(11) 0.0051(10) 0.0013(11)
C7B 0.0295(16) 0.0361(18) 0.0303(16) 0.0012(13) 0.0119(12) 0.0069(13)
C8B 0.0228(15) 0.0299(16) 0.0310(15) 0.0048(12) 0.0088(11) 0.0047(12)
C12B 0.0200(14) 0.0248(14) 0.0270(14) 0.0012(11) 0.0067(11) 0.0040(11)
C13B 0.0324(17) 0.0271(15) 0.0278(15) -0.0001(12) 0.0077(12) 0.0000(12)
C14B 0.0398(19) 0.0343(18) 0.0287(16) -0.0033(13) 0.0080(13) 0.0055(14)
C15B 0.0310(17) 0.0388(18) 0.0307(16) 0.0022(13) 0.0128(12) 0.0091(13)
C16B 0.0293(17) 0.0340(17) 0.0415(18) 0.0008(14) 0.0180(13) -0.0014(13)
C17B 0.0278(16) 0.0310(17) 0.0372(17) -0.0044(13) 0.0131(12) -0.0027(12)
C18B 0.0182(13) 0.0187(13) 0.0280(14) 0.0010(11) 0.0048(10) -0.0042(10)
C19B 0.0256(15) 0.0226(14) 0.0314(15) 0.0000(12) 0.0062(11) 0.0026(11)
C20B 0.0378(18) 0.0292(16) 0.0278(15) -0.0041(12) 0.0029(12) -0.0018(13)
C21B 0.0294(16) 0.0283(16) 0.0323(16) 0.0033(12) -0.0030(12) -0.0034(12)
C22B 0.0232(16) 0.0288(16) 0.0404(18) -0.0036(13) 0.0051(13) 0.0020(12)
C23B 0.0235(15) 0.0274(15) 0.0317(15) -0.0053(12) 0.0050(12) 0.0011(12)
C24B 0.0213(14) 0.0232(14) 0.0325(15) -0.0070(12) 0.0120(11) -0.0030(11)
C25B 0.0302(17) 0.0302(17) 0.0365(17) 0.0008(13) 0.0056(13) -0.0078(13)
C26B 0.043(2) 0.0315(17) 0.0398(18) 0.0026(14) 0.0096(15) -0.0089(14)
C27B 0.0358(18) 0.0282(16) 0.0421(18) -0.0063(14) 0.0157(14) -0.0102(13)
C28B 0.0278(16) 0.0317(17) 0.0444(18) -0.0144(14) 0.0072(13) -0.0062(13)
C29B 0.0294(16) 0.0266(16) 0.0356(16) -0.0061(13) 0.0055(12) -0.0013(12)
B1A 0.0210(16) 0.0297(18) 0.0330(17) -0.0067(14) 0.0026(13) -0.0029(13)
B5A 0.0237(16) 0.0231(16) 0.0246(15) -0.0047(12) 0.0031(12) -0.0005(12)
B4A 0.0229(16) 0.0280(17) 0.0263(16) 0.0009(13) 0.0026(12) 0.0010(13)
B3A 0.0212(16) 0.0268(17) 0.0311(17) -0.0026(13) 0.0034(13) 0.0009(12)
B2A 0.0193(16) 0.0245(17) 0.0373(18) -0.0007(14) 0.0075(13) -0.0029(12)
B6A 0.0217(16) 0.0171(15) 0.0389(18) -0.0044(13) 0.0071(13) -0.0008(12)
B9A 0.0206(15) 0.0187(15) 0.0217(14) -0.0003(11) 0.0055(11) -0.0019(11)
B10A 0.0185(15) 0.0222(16) 0.0290(16) 0.0036(12) 0.0040(12) -0.0017(12)
B11A 0.0214(16) 0.0303(18) 0.0327(17) 0.0079(14) 0.0030(13) -0.0039(13)
B1B 0.0229(17) 0.0254(17) 0.0332(17) 0.0007(13) 0.0014(13) 0.0021(13)
B2B 0.0249(17) 0.0273(18) 0.0367(19) -0.0019(14) 0.0094(14) 0.0028(13)
B3B 0.0212(17) 0.0279(18) 0.047(2) 0.0048(15) 0.0058(14) 0.0038(13)
B4B 0.0244(17) 0.0256(17) 0.0386(19) -0.0016(14) -0.0013(14) -0.0003(13)
B5B 0.0268(17) 0.0249(17) 0.0281(17) -0.0007(13) 0.0062(13) 0.0027(13)
B6B 0.0257(17) 0.0183(15) 0.0357(18) 0.0017(13) 0.0097(13) -0.0006(12)
B9B 0.0177(15) 0.0233(16) 0.0275(16) -0.0020(12) 0.0050(12) 0.0019(12)
B10B 0.0207(16) 0.0257(17) 0.0337(18) -0.0065(13) 0.0049(13) -0.0006(13)
B11B 0.0294(18) 0.0331(19) 0.0330(18) -0.0108(15) 0.0042(14) 0.0026(14)
I1A' 0.089(3) 0.063(2) 0.288(11) -0.068(4) 0.108(5) -0.028(2)
I1B' 0.112(8) 0.092(7) 0.193(16) 0.042(8) -0.058(9) -0.010(5)

_geom_special_details            
;
 All esds (except the esd in the dihedral angle between two l.s. planes)
 are estimated using the full covariance matrix.  The cell esds are taken
 into account individually in the estimation of esds in distances, angles
 and torsion angles; correlations between esds in cell parameters are only
 used when they are defined by crystal symmetry.  An approximate (isotropic)
 treatment of cell esds is used for estimating esds involving l.s. planes.
;

loop_
_geom_bond_atom_site_label_1
_geom_bond_atom_site_label_2
_geom_bond_distance
_geom_bond_site_symmetry_2
_geom_bond_publ_flag
I1A B6A 2.196(3) . ?
I1B B6B 2.194(3) . ?
P1A C24A 1.801(3) . ?
P1A C18A 1.808(3) . ?
P1A C12A 1.818(3) . ?
P1A B9A 1.911(3) . ?
P1B C18B 1.806(3) . ?
P1B C12B 1.809(3) . ?
P1B C24B 1.820(3) . ?
P1B B9B 1.905(3) . ?
C7A C8A 1.552(4) . ?
C7A B11A 1.635(5) . ?
C7A B2A 1.685(4) . ?
C7A B3A 1.700(4) . ?
C7A H7A 1.1200 . ?
C8A B9A 1.610(4) . ?
C8A B3A 1.723(4) . ?
C8A B4A 1.733(4) . ?
C8A H8A 1.1200 . ?
C12A C13A 1.394(4) . ?
C12A C17A 1.394(4) . ?
C13A C14A 1.390(4) . ?
C13A H13A 0.9500 . ?
C14A C15A 1.377(5) . ?
C14A H14A 0.9500 . ?
C15A C16A 1.373(5) . ?
C15A H15A 0.9500 . ?
C16A C17A 1.405(4) . ?
C16A H16A 0.9500 . ?
C17A H17A 0.9500 . ?
C18A C23A 1.392(4) . ?
C18A C19A 1.397(4) . ?
C19A C20A 1.388(5) . ?
C19A H19A 0.9500 . ?
C20A C21A 1.392(5) . ?
C20A H20A 0.9500 . ?
C21A C22A 1.386(5) . ?
C21A H21A 0.9500 . ?
C22A C23A 1.387(5) . ?
C22A H22A 0.9500 . ?
C23A H23A 0.9500 . ?
C24A C29A 1.394(4) . ?
C24A C25A 1.397(4) . ?
C25A C26A 1.388(4) . ?
C25A H25A 0.9500 . ?
C26A C27A 1.386(5) . ?
C26A H26A 0.9500 . ?
C27A C28A 1.369(5) . ?
C27A H27A 0.9500 . ?
C28A C29A 1.389(4) . ?
C28A H28A 0.9500 . ?
C29A H29A 0.9500 . ?
C7B C8B 1.548(4) . ?
C7B B11B 1.628(5) . ?
C7B B3B 1.700(5) . ?
C7B B2B 1.701(5) . ?
C7B H7B 1.1200 . ?
C8B B9B 1.607(4) . ?
C8B B3B 1.728(5) . ?
C8B B4B 1.742(5) . ?
C8B H8B 1.1200 . ?
C12B C13B 1.392(4) . ?
C12B C17B 1.396(4) . ?
C13B C14B 1.396(4) . ?
C13B H13B 0.9500 . ?
C14B C15B 1.379(5) . ?
C14B H14B 0.9500 . ?
C15B C16B 1.380(5) . ?
C15B H15B 0.9500 . ?
C16B C17B 1.389(4) . ?
C16B H16B 0.9500 . ?
C17B H17B 0.9500 . ?
C18B C19B 1.386(4) . ?
C18B C23B 1.395(4) . ?
C19B C20B 1.388(4) . ?
C19B H19B 0.9500 . ?
C20B C21B 1.385(5) . ?
C20B H20B 0.9500 . ?
C21B C22B 1.379(5) . ?
C21B H21B 0.9500 . ?
C22B C23B 1.381(5) . ?
C22B H22B 0.9500 . ?
C23B H23B 0.9500 . ?
C24B C25B 1.393(5) . ?
C24B C29B 1.397(4) . ?
C25B C26B 1.393(4) . ?
C25B H25B 0.9500 . ?
C26B C27B 1.370(5) . ?
C26B H26B 0.9500 . ?
C27B C28B 1.376(5) . ?
C27B H27B 0.9500 . ?
C28B C29B 1.399(5) . ?
C28B H28B 0.9500 . ?
C29B H29B 0.9500 . ?
B1A B2A 1.757(5) . ?
B1A B3A 1.773(5) . ?
B1A B4A 1.775(5) . ?
B1A B5A 1.789(5) . ?
B1A B6A 1.798(5) . ?
B1A H1A 1.1200 . ?
B5A B9A 1.750(4) . ?
B5A B4A 1.766(5) . ?
B5A B10A 1.799(5) . ?
B5A B6A 1.799(5) . ?
B5A H5A 1.1200 . ?
B4A B3A 1.771(5) . ?
B4A B9A 1.774(5) . ?
B4A H4A 1.1200 . ?
B3A B2A 1.761(5) . ?
B3A H3A 1.1200 . ?
B2A B6A 1.761(5) . ?
B2A B11A 1.793(5) . ?
B2A H2A 1.1200 . ?
B6A B10A 1.776(5) . ?
B6A B11A 1.787(5) . ?
B6A I1A' 2.233(7) . ?
B9A B10A 1.785(4) . ?
B10A B11A 1.875(5) . ?
B10A H10A 1.1200 . ?
B10A H10C 1.25(4) . ?
B11A H11A 1.1200 . ?
B11A H10C 1.34(4) . ?
B1B B2B 1.754(5) . ?
B1B B4B 1.771(5) . ?
B1B B5B 1.780(5) . ?
B1B B3B 1.787(5) . ?
B1B B6B 1.799(5) . ?
B1B H1B 1.1200 . ?
B2B B3B 1.755(5) . ?
B2B B6B 1.758(5) . ?
B2B B11B 1.811(5) . ?
B2B H2B 1.1200 . ?
B3B B4B 1.778(5) . ?
B3B H3B 1.1200 . ?
B4B B5B 1.768(5) . ?
B4B B9B 1.771(5) . ?
B4B H4B 1.1200 . ?
B5B B9B 1.759(5) . ?
B5B B6B 1.794(5) . ?
B5B B10B 1.800(5) . ?
B5B H5B 1.1200 . ?
B6B B10B 1.785(5) . ?
B6B B11B 1.801(5) . ?
B6B I1B' 2.173(12) . ?
B9B B10B 1.789(5) . ?
B10B B11B 1.879(5) . ?
B10B H10B 1.1200 . ?
B10B H10D 1.16(4) . ?
B11B H11B 1.1200 . ?
B11B H10D 1.30(4) . ?

loop_
_geom_angle_atom_site_label_1
_geom_angle_atom_site_label_2
_geom_angle_atom_site_label_3
_geom_angle
_geom_angle_site_symmetry_1
_geom_angle_site_symmetry_3
_geom_angle_publ_flag
C24A P1A C18A 106.32(13) . . ?
C24A P1A C12A 106.77(13) . . ?
C18A P1A C12A 109.12(14) . . ?
C24A P1A B9A 115.08(13) . . ?
C18A P1A B9A 109.17(13) . . ?
C12A P1A B9A 110.19(13) . . ?
C18B P1B C12B 105.84(13) . . ?
C18B P1B C24B 104.78(13) . . ?
C12B P1B C24B 109.74(13) . . ?
C18B P1B B9B 111.88(14) . . ?
C12B P1B B9B 111.42(14) . . ?
C24B P1B B9B 112.76(14) . . ?
C8A C7A B11A 110.8(2) . . ?
C8A C7A B2A 112.1(2) . . ?
B11A C7A B2A 65.4(2) . . ?
C8A C7A B3A 63.80(19) . . ?
B11A C7A B3A 118.3(2) . . ?
B2A C7A B3A 62.70(19) . . ?
C8A C7A H7A 110.2 . . ?
B11A C7A H7A 106.6 . . ?
B2A C7A H7A 136.8 . . ?
B3A C7A H7A 134.0 . . ?
C7A C8A B9A 115.2(2) . . ?
C7A C8A B3A 62.29(19) . . ?
B9A C8A B3A 116.1(2) . . ?
C7A C8A B4A 112.6(2) . . ?
B9A C8A B4A 63.97(18) . . ?
B3A C8A B4A 61.67(19) . . ?
C7A C8A H8A 108.5 . . ?
B9A C8A H8A 106.1 . . ?
B3A C8A H8A 136.6 . . ?
B4A C8A H8A 137.8 . . ?
C13A C12A C17A 119.7(3) . . ?
C13A C12A P1A 118.7(2) . . ?
C17A C12A P1A 121.6(2) . . ?
C14A C13A C12A 120.3(3) . . ?
C14A C13A H13A 119.9 . . ?
C12A C13A H13A 119.9 . . ?
C15A C14A C13A 120.1(3) . . ?
C15A C14A H14A 119.9 . . ?
C13A C14A H14A 119.9 . . ?
C16A C15A C14A 120.1(3) . . ?
C16A C15A H15A 119.9 . . ?
C14A C15A H15A 119.9 . . ?
C15A C16A C17A 120.8(3) . . ?
C15A C16A H16A 119.6 . . ?
C17A C16A H16A 119.6 . . ?
C12A C17A C16A 118.9(3) . . ?
C12A C17A H17A 120.5 . . ?
C16A C17A H17A 120.5 . . ?
C23A C18A C19A 119.9(3) . . ?
C23A C18A P1A 120.7(2) . . ?
C19A C18A P1A 119.3(2) . . ?
C20A C19A C18A 119.7(3) . . ?
C20A C19A H19A 120.1 . . ?
C18A C19A H19A 120.1 . . ?
C19A C20A C21A 120.0(3) . . ?
C19A C20A H20A 120.0 . . ?
C21A C20A H20A 120.0 . . ?
C22A C21A C20A 120.4(3) . . ?
C22A C21A H21A 119.8 . . ?
C20A C21A H21A 119.8 . . ?
C23A C22A C21A 119.7(3) . . ?
C23A C22A H22A 120.1 . . ?
C21A C22A H22A 120.1 . . ?
C22A C23A C18A 120.3(3) . . ?
C22A C23A H23A 119.9 . . ?
C18A C23A H23A 119.9 . . ?
C29A C24A C25A 120.3(3) . . ?
C29A C24A P1A 119.6(2) . . ?
C25A C24A P1A 120.1(2) . . ?
C26A C25A C24A 119.1(3) . . ?
C26A C25A H25A 120.4 . . ?
C24A C25A H25A 120.4 . . ?
C27A C26A C25A 120.2(3) . . ?
C27A C26A H26A 119.9 . . ?
C25A C26A H26A 119.9 . . ?
C28A C27A C26A 120.6(3) . . ?
C28A C27A H27A 119.7 . . ?
C26A C27A H27A 119.7 . . ?
C27A C28A C29A 120.2(3) . . ?
C27A C28A H28A 119.9 . . ?
C29A C28A H28A 119.9 . . ?
C28A C29A C24A 119.5(3) . . ?
C28A C29A H29A 120.2 . . ?
C24A C29A H29A 120.2 . . ?
C8B C7B B11B 111.4(2) . . ?
C8B C7B B3B 64.1(2) . . ?
B11B C7B B3B 118.7(3) . . ?
C8B C7B B2B 111.9(2) . . ?
B11B C7B B2B 65.9(2) . . ?
B3B C7B B2B 62.1(2) . . ?
C8B C7B H7B 110.0 . . ?
B11B C7B H7B 106.0 . . ?
B3B C7B H7B 134.1 . . ?
B2B C7B H7B 137.2 . . ?
C7B C8B B9B 115.0(3) . . ?
C7B C8B B3B 62.2(2) . . ?
B9B C8B B3B 116.0(2) . . ?
C7B C8B B4B 112.3(2) . . ?
B9B C8B B4B 63.72(19) . . ?
B3B C8B B4B 61.6(2) . . ?
C7B C8B H8B 108.7 . . ?
B9B C8B H8B 106.3 . . ?
B3B C8B H8B 136.6 . . ?
B4B C8B H8B 138.0 . . ?
C13B C12B C17B 119.6(3) . . ?
C13B C12B P1B 123.6(2) . . ?
C17B C12B P1B 116.9(2) . . ?
C12B C13B C14B 120.1(3) . . ?
C12B C13B H13B 120.0 . . ?
C14B C13B H13B 120.0 . . ?
C15B C14B C13B 119.7(3) . . ?
C15B C14B H14B 120.1 . . ?
C13B C14B H14B 120.1 . . ?
C16B C15B C14B 120.6(3) . . ?
C16B C15B H15B 119.7 . . ?
C14B C15B H15B 119.7 . . ?
C15B C16B C17B 120.1(3) . . ?
C15B C16B H16B 119.9 . . ?
C17B C16B H16B 119.9 . . ?
C16B C17B C12B 119.8(3) . . ?
C16B C17B H17B 120.1 . . ?
C12B C17B H17B 120.1 . . ?
C19B C18B C23B 120.0(3) . . ?
C19B C18B P1B 120.5(2) . . ?
C23B C18B P1B 119.2(2) . . ?
C18B C19B C20B 119.6(3) . . ?
C18B C19B H19B 120.2 . . ?
C20B C19B H19B 120.2 . . ?
C21B C20B C19B 120.1(3) . . ?
C21B C20B H20B 120.0 . . ?
C19B C20B H20B 120.0 . . ?
C22B C21B C20B 120.4(3) . . ?
C22B C21B H21B 119.8 . . ?
C20B C21B H21B 119.8 . . ?
C21B C22B C23B 119.9(3) . . ?
C21B C22B H22B 120.0 . . ?
C23B C22B H22B 120.0 . . ?
C22B C23B C18B 120.0(3) . . ?
C22B C23B H23B 120.0 . . ?
C18B C23B H23B 120.0 . . ?
C25B C24B C29B 118.9(3) . . ?
C25B C24B P1B 119.7(2) . . ?
C29B C24B P1B 121.3(2) . . ?
C24B C25B C26B 120.8(3) . . ?
C24B C25B H25B 119.6 . . ?
C26B C25B H25B 119.6 . . ?
C27B C26B C25B 119.8(3) . . ?
C27B C26B H26B 120.1 . . ?
C25B C26B H26B 120.1 . . ?
C26B C27B C28B 120.5(3) . . ?
C26B C27B H27B 119.7 . . ?
C28B C27B H27B 119.7 . . ?
C27B C28B C29B 120.4(3) . . ?
C27B C28B H28B 119.8 . . ?
C29B C28B H28B 119.8 . . ?
C24B C29B C28B 119.6(3) . . ?
C24B C29B H29B 120.2 . . ?
C28B C29B H29B 120.2 . . ?
B2A B1A B3A 59.84(19) . . ?
B2A B1A B4A 107.9(2) . . ?
B3A B1A B4A 59.89(19) . . ?
B2A B1A B5A 108.1(2) . . ?
B3A B1A B5A 107.3(2) . . ?
B4A B1A B5A 59.37(19) . . ?
B2A B1A B6A 59.38(19) . . ?
B3A B1A B6A 106.6(2) . . ?
B4A B1A B6A 107.0(2) . . ?
B5A B1A B6A 60.21(19) . . ?
B2A B1A H1A 121.6 . . ?
B3A B1A H1A 122.4 . . ?
B4A B1A H1A 122.1 . . ?
B5A B1A H1A 121.8 . . ?
B6A B1A H1A 122.5 . . ?
B9A B5A B4A 60.59(18) . . ?
B9A B5A B1A 107.0(2) . . ?
B4A B5A B1A 59.92(19) . . ?
B9A B5A B10A 60.39(18) . . ?
B4A B5A B10A 111.1(2) . . ?
B1A B5A B10A 109.8(2) . . ?
B9A B5A B6A 104.6(2) . . ?
B4A B5A B6A 107.4(2) . . ?
B1A B5A B6A 60.12(19) . . ?
B10A B5A B6A 59.14(18) . . ?
B9A B5A H5A 123.2 . . ?
B4A B5A H5A 120.5 . . ?
B1A B5A H5A 121.4 . . ?
B10A B5A H5A 119.9 . . ?
B6A B5A H5A 123.8 . . ?
C8A B4A B5A 100.5(2) . . ?
C8A B4A B3A 58.89(18) . . ?
B5A B4A B3A 108.4(2) . . ?
C8A B4A B9A 54.67(16) . . ?
B5A B4A B9A 59.28(18) . . ?
B3A B4A B9A 105.9(2) . . ?
C8A B4A B1A 102.2(2) . . ?
B5A B4A B1A 60.71(19) . . ?
B3A B4A B1A 59.99(19) . . ?
B9A B4A B1A 106.6(2) . . ?
C8A B4A H4A 128.0 . . ?
B5A B4A H4A 122.9 . . ?
B3A B4A H4A 121.0 . . ?
B9A B4A H4A 123.6 . . ?
B1A B4A H4A 122.6 . . ?
C7A B3A C8A 53.91(17) . . ?
C7A B3A B2A 58.24(19) . . ?
C8A B3A B2A 100.9(2) . . ?
C7A B3A B4A 104.0(2) . . ?
C8A B3A B4A 59.43(18) . . ?
B2A B3A B4A 107.9(2) . . ?
C7A B3A B1A 103.5(2) . . ?
C8A B3A B1A 102.7(2) . . ?
B2A B3A B1A 59.6(2) . . ?
B4A B3A B1A 60.12(19) . . ?
C7A B3A H3A 125.8 . . ?
C8A B3A H3A 127.0 . . ?
B2A B3A H3A 123.2 . . ?
B4A B3A H3A 121.3 . . ?
B1A B3A H3A 123.6 . . ?
C7A B2A B1A 104.8(2) . . ?
C7A B2A B3A 59.06(18) . . ?
B1A B2A B3A 60.5(2) . . ?
C7A B2A B6A 102.3(2) . . ?
B1A B2A B6A 61.4(2) . . ?
B3A B2A B6A 108.7(2) . . ?
C7A B2A B11A 55.97(19) . . ?
B1A B2A B11A 109.7(2) . . ?
B3A B2A B11A 107.3(2) . . ?
B6A B2A B11A 60.4(2) . . ?
C7A B2A H2A 126.7 . . ?
B1A B2A H2A 120.8 . . ?
B3A B2A H2A 121.1 . . ?
B6A B2A H2A 122.4 . . ?
B11A B2A H2A 121.9 . . ?
B2A B6A B10A 112.8(2) . . ?
B2A B6A B11A 60.72(19) . . ?
B10A B6A B11A 63.50(19) . . ?
B2A B6A B1A 59.18(19) . . ?
B10A B6A B1A 110.4(2) . . ?
B11A B6A B1A 108.2(2) . . ?
B2A B6A B5A 107.5(2) . . ?
B10A B6A B5A 60.41(18) . . ?
B11A B6A B5A 109.0(2) . . ?
B1A B6A B5A 59.67(19) . . ?
B2A B6A I1A 119.3(2) . . ?
B10A B6A I1A 120.3(2) . . ?
B11A B6A I1A 121.5(2) . . ?
B1A B6A I1A 119.9(2) . . ?
B5A B6A I1A 122.7(2) . . ?
B2A B6A I1A' 122.4(2) . . ?
B10A B6A I1A' 123.5(2) . . ?
B11A B6A I1A' 136.9(7) . . ?
B1A B6A I1A' 107.3(6) . . ?
B5A B6A I1A' 109.6(6) . . ?
C8A B9A B5A 106.2(2) . . ?
C8A B9A B4A 61.37(18) . . ?
B5A B9A B4A 60.13(18) . . ?
C8A B9A B10A 106.9(2) . . ?
B5A B9A B10A 61.14(18) . . ?
B4A B9A B10A 111.3(2) . . ?
C8A B9A P1A 117.1(2) . . ?
B5A B9A P1A 129.7(2) . . ?
B4A B9A P1A 120.8(2) . . ?
B10A B9A P1A 122.8(2) . . ?
B6A B10A B9A 104.1(2) . . ?
B6A B10A B5A 60.45(19) . . ?
B9A B10A B5A 58.47(17) . . ?
B6A B10A B11A 58.55(18) . . ?
B9A B10A B11A 100.8(2) . . ?
B5A B10A B11A 105.3(2) . . ?
B6A B10A H10A 138.0 . . ?
B9A B10A H10A 117.2 . . ?
B5A B10A H10A 137.3 . . ?
B11A B10A H10A 116.7 . . ?
B6A B10A H10C 103.7(17) . . ?
B9A B10A H10C 85.8(17) . . ?
B5A B10A H10C 130.8(16) . . ?
B11A B10A H10C 45.4(17) . . ?
H10A B10A H10C 87.2 . . ?
C7A B11A B6A 103.2(2) . . ?
C7A B11A B2A 58.67(19) . . ?
B6A B11A B2A 58.93(19) . . ?
C7A B11A B10A 106.0(2) . . ?
B6A B11A B10A 57.96(18) . . ?
B2A B11A B10A 106.8(2) . . ?
C7A B11A H11A 115.6 . . ?
B6A B11A H11A 140.5 . . ?
B2A B11A H11A 137.9 . . ?
B10A B11A H11A 114.2 . . ?
C7A B11A H10C 93.6(16) . . ?
B6A B11A H10C 99.4(15) . . ?
B2A B11A H10C 133.9(15) . . ?
B10A B11A H10C 41.7(15) . . ?
H11A B11A H10C 85.8 . . ?
B2B B1B B4B 107.8(3) . . ?
B2B B1B B5B 108.1(2) . . ?
B4B B1B B5B 59.71(19) . . ?
B2B B1B B3B 59.4(2) . . ?
B4B B1B B3B 60.0(2) . . ?
B5B B1B B3B 107.4(2) . . ?
B2B B1B B6B 59.30(19) . . ?
B4B B1B B6B 107.2(2) . . ?
B5B B1B B6B 60.16(19) . . ?
B3B B1B B6B 106.2(2) . . ?
B2B B1B H1B 121.9 . . ?
B4B B1B H1B 121.9 . . ?
B5B B1B H1B 121.6 . . ?
B3B B1B H1B 122.6 . . ?
B6B B1B H1B 122.7 . . ?
C7B B2B B3B 58.9(2) . . ?
C7B B2B B1B 104.9(2) . . ?
B3B B2B B1B 61.2(2) . . ?
C7B B2B B6B 101.9(2) . . ?
B3B B2B B6B 109.4(2) . . ?
B1B B2B B6B 61.6(2) . . ?
C7B B2B B11B 55.1(2) . . ?
B3B B2B B11B 106.8(3) . . ?
B1B B2B B11B 109.9(2) . . ?
B6B B2B B11B 60.6(2) . . ?
C7B B2B H2B 127.2 . . ?
B3B B2B H2B 120.8 . . ?
B1B B2B H2B 120.4 . . ?
B6B B2B H2B 122.1 . . ?
B11B B2B H2B 122.2 . . ?
C7B B3B C8B 53.68(18) . . ?
C7B B3B B2B 59.0(2) . . ?
C8B B3B B2B 101.3(2) . . ?
C7B B3B B4B 103.7(2) . . ?
C8B B3B B4B 59.56(19) . . ?
B2B B3B B4B 107.4(3) . . ?
C7B B3B B1B 103.5(2) . . ?
C8B B3B B1B 102.5(2) . . ?
B2B B3B B1B 59.4(2) . . ?
B4B B3B B1B 59.6(2) . . ?
C7B B3B H3B 125.6 . . ?
C8B B3B H3B 126.9 . . ?
B2B B3B H3B 123.0 . . ?
B4B B3B H3B 121.7 . . ?
B1B B3B H3B 123.9 . . ?
C8B B4B B5B 100.5(2) . . ?
C8B B4B B1B 102.6(2) . . ?
B5B B4B B1B 60.40(19) . . ?
C8B B4B B9B 54.42(17) . . ?
B5B B4B B9B 59.60(19) . . ?
B1B B4B B9B 106.9(2) . . ?
C8B B4B B3B 58.80(19) . . ?
B5B B4B B3B 108.3(2) . . ?
B1B B4B B3B 60.5(2) . . ?
B9B B4B B3B 105.7(2) . . ?
C8B B4B H4B 127.9 . . ?
B5B B4B H4B 123.0 . . ?
B1B B4B H4B 122.3 . . ?
B9B B4B H4B 123.6 . . ?
B3B B4B H4B 121.1 . . ?
B9B B5B B4B 60.30(19) . . ?
B9B B5B B1B 107.0(2) . . ?
B4B B5B B1B 59.88(19) . . ?
B9B B5B B6B 104.8(2) . . ?
B4B B5B B6B 107.5(2) . . ?
B1B B5B B6B 60.43(19) . . ?
B9B B5B B10B 60.32(19) . . ?
B4B B5B B10B 111.0(2) . . ?
B1B B5B B10B 110.4(2) . . ?
B6B B5B B10B 59.57(19) . . ?
B9B B5B H5B 123.4 . . ?
B4B B5B H5B 120.7 . . ?
B1B B5B H5B 121.1 . . ?
B6B B5B H5B 123.4 . . ?
B10B B5B H5B 119.6 . . ?
B2B B6B B10B 112.8(2) . . ?
B2B B6B B5B 107.3(2) . . ?
B10B B6B B5B 60.40(19) . . ?
B2B B6B B1B 59.07(19) . . ?
B10B B6B B1B 110.2(2) . . ?
B5B B6B B1B 59.41(19) . . ?
B2B B6B B11B 61.2(2) . . ?
B10B B6B B11B 63.2(2) . . ?
B5B B6B B11B 108.8(2) . . ?
B1B B6B B11B 108.3(2) . . ?
B2B B6B I1B' 115.0(5) . . ?
B10B B6B I1B' 107.8(4) . . ?
B5B B6B I1B' 136.9(6) . . ?
B1B B6B I1B' 140.3(5) . . ?
B11B B6B I1B' 98.8(6) . . ?
B2B B6B I1B 118.5(2) . . ?
B10B B6B I1B 121.5(2) . . ?
B5B B6B I1B 122.8(2) . . ?
B1B B6B I1B 118.9(2) . . ?
B11B B6B I1B 122.2(2) . . ?
C8B B9B B5B 106.5(2) . . ?
C8B B9B B4B 61.9(2) . . ?
B5B B9B B4B 60.10(19) . . ?
C8B B9B B10B 107.0(2) . . ?
B5B B9B B10B 60.98(19) . . ?
B4B B9B B10B 111.3(2) . . ?
C8B B9B P1B 120.7(2) . . ?
B5B B9B P1B 123.6(2) . . ?
B4B B9B P1B 116.9(2) . . ?
B10B B9B P1B 123.4(2) . . ?
B6B B10B B9B 103.9(2) . . ?
B6B B10B B5B 60.04(19) . . ?
B9B B10B B5B 58.70(18) . . ?
B6B B10B B11B 58.81(19) . . ?
B9B B10B B11B 100.6(2) . . ?
B5B B10B B11B 105.2(2) . . ?
B6B B10B H10B 138.1 . . ?
B9B B10B H10B 117.3 . . ?
B5B B10B H10B 137.4 . . ?
B11B B10B H10B 116.7 . . ?
B6B B10B H10D 101.7(19) . . ?
B9B B10B H10D 86.3(19) . . ?
B5B B10B H10D 129.9(19) . . ?
B11B B10B H10D 43.2(19) . . ?
H10B B10B H10D 88.8 . . ?
C7B B11B B6B 103.0(2) . . ?
C7B B11B B2B 59.0(2) . . ?
B6B B11B B2B 58.24(19) . . ?
C7B B11B B10B 105.7(2) . . ?
B6B B11B B10B 57.98(19) . . ?
B2B B11B B10B 106.2(2) . . ?
C7B B11B H11B 115.5 . . ?
B6B B11B H11B 140.7 . . ?
B2B B11B H11B 138.2 . . ?
B10B B11B H11B 114.5 . . ?
C7B B11B H10D 94.7(17) . . ?
B6B B11B H10D 95.4(17) . . ?
B2B B11B H10D 131.4(17) . . ?
B10B B11B H10D 37.7(17) . . ?
H11B B11B H10D 88.9 . . ?

loop_
_geom_torsion_atom_site_label_1
_geom_torsion_atom_site_label_2
_geom_torsion_atom_site_label_3
_geom_torsion_atom_site_label_4
_geom_torsion
_geom_torsion_site_symmetry_1
_geom_torsion_site_symmetry_2
_geom_torsion_site_symmetry_3
_geom_torsion_site_symmetry_4
_geom_torsion_publ_flag
B11A C7A C8A B9A -4.5(3) . . . . ?
B2A C7A C8A B9A 66.4(3) . . . . ?
B3A C7A C8A B9A 107.7(3) . . . . ?
B11A C7A C8A B3A -112.2(3) . . . . ?
B2A C7A C8A B3A -41.2(2) . . . . ?
B11A C7A C8A B4A -75.3(3) . . . . ?
B2A C7A C8A B4A -4.3(3) . . . . ?
B3A C7A C8A B4A 36.9(2) . . . . ?
C24A P1A C12A C13A -60.5(3) . . . . ?
C18A P1A C12A C13A -175.0(2) . . . . ?
B9A P1A C12A C13A 65.2(3) . . . . ?
C24A P1A C12A C17A 121.9(2) . . . . ?
C18A P1A C12A C17A 7.4(3) . . . . ?
B9A P1A C12A C17A -112.5(2) . . . . ?
C17A C12A C13A C14A 2.0(4) . . . . ?
P1A C12A C13A C14A -175.7(2) . . . . ?
C12A C13A C14A C15A -1.0(5) . . . . ?
C13A C14A C15A C16A -0.9(5) . . . . ?
C14A C15A C16A C17A 1.8(5) . . . . ?
C13A C12A C17A C16A -1.1(4) . . . . ?
P1A C12A C17A C16A 176.5(2) . . . . ?
C15A C16A C17A C12A -0.8(4) . . . . ?
C24A P1A C18A C23A -20.9(3) . . . . ?
C12A P1A C18A C23A 93.9(3) . . . . ?
B9A P1A C18A C23A -145.6(2) . . . . ?
C24A P1A C18A C19A 156.4(3) . . . . ?
C12A P1A C18A C19A -88.8(3) . . . . ?
B9A P1A C18A C19A 31.7(3) . . . . ?
C23A C18A C19A C20A -0.1(5) . . . . ?
P1A C18A C19A C20A -177.4(3) . . . . ?
C18A C19A C20A C21A 0.1(5) . . . . ?
C19A C20A C21A C22A -0.1(5) . . . . ?
C20A C21A C22A C23A 0.2(5) . . . . ?
C21A C22A C23A C18A -0.2(5) . . . . ?
C19A C18A C23A C22A 0.2(5) . . . . ?
P1A C18A C23A C22A 177.4(2) . . . . ?
C18A P1A C24A C29A -86.9(2) . . . . ?
C12A P1A C24A C29A 156.7(2) . . . . ?
B9A P1A C24A C29A 34.1(3) . . . . ?
C18A P1A C24A C25A 91.7(3) . . . . ?
C12A P1A C24A C25A -24.7(3) . . . . ?
B9A P1A C24A C25A -147.3(2) . . . . ?
C29A C24A C25A C26A -1.2(5) . . . . ?
P1A C24A C25A C26A -179.7(3) . . . . ?
C24A C25A C26A C27A 0.4(5) . . . . ?
C25A C26A C27A C28A 0.4(5) . . . . ?
C26A C27A C28A C29A -0.4(5) . . . . ?
C27A C28A C29A C24A -0.4(5) . . . . ?
C25A C24A C29A C28A 1.2(4) . . . . ?
P1A C24A C29A C28A 179.8(2) . . . . ?
B11B C7B C8B B9B 5.0(4) . . . . ?
B3B C7B C8B B9B -107.5(3) . . . . ?
B2B C7B C8B B9B -66.6(3) . . . . ?
B11B C7B C8B B3B 112.5(3) . . . . ?
B2B C7B C8B B3B 40.9(2) . . . . ?
B11B C7B C8B B4B 75.4(3) . . . . ?
B3B C7B C8B B4B -37.1(2) . . . . ?
B2B C7B C8B B4B 3.8(3) . . . . ?
C18B P1B C12B C13B -118.8(3) . . . . ?
C24B P1B C12B C13B -6.2(3) . . . . ?
B9B P1B C12B C13B 119.4(3) . . . . ?
C18B P1B C12B C17B 62.3(3) . . . . ?
C24B P1B C12B C17B 174.9(2) . . . . ?
B9B P1B C12B C17B -59.5(3) . . . . ?
C17B C12B C13B C14B 0.9(5) . . . . ?
P1B C12B C13B C14B -178.0(2) . . . . ?
C12B C13B C14B C15B -0.2(5) . . . . ?
C13B C14B C15B C16B -0.9(5) . . . . ?
C14B C15B C16B C17B 1.3(5) . . . . ?
C15B C16B C17B C12B -0.6(5) . . . . ?
C13B C12B C17B C16B -0.5(5) . . . . ?
P1B C12B C17B C16B 178.4(3) . . . . ?
C12B P1B C18B C19B -150.1(2) . . . . ?
C24B P1B C18B C19B 94.0(2) . . . . ?
B9B P1B C18B C19B -28.5(3) . . . . ?
C12B P1B C18B C23B 36.5(3) . . . . ?
C24B P1B C18B C23B -79.5(2) . . . . ?
B9B P1B C18B C23B 158.0(2) . . . . ?
C23B C18B C19B C20B -0.3(4) . . . . ?
P1B C18B C19B C20B -173.7(2) . . . . ?
C18B C19B C20B C21B 1.0(5) . . . . ?
C19B C20B C21B C22B -0.9(5) . . . . ?
C20B C21B C22B C23B 0.0(5) . . . . ?
C21B C22B C23B C18B 0.8(5) . . . . ?
C19B C18B C23B C22B -0.6(4) . . . . ?
P1B C18B C23B C22B 172.9(2) . . . . ?
C18B P1B C24B C25B -5.0(3) . . . . ?
C12B P1B C24B C25B -118.2(2) . . . . ?
B9B P1B C24B C25B 116.9(3) . . . . ?
C18B P1B C24B C29B 177.5(2) . . . . ?
C12B P1B C24B C29B 64.3(3) . . . . ?
B9B P1B C24B C29B -60.6(3) . . . . ?
C29B C24B C25B C26B 0.6(5) . . . . ?
P1B C24B C25B C26B -177.0(3) . . . . ?
C24B C25B C26B C27B 0.4(5) . . . . ?
C25B C26B C27B C28B -0.8(5) . . . . ?
C26B C27B C28B C29B 0.2(5) . . . . ?
C25B C24B C29B C28B -1.1(4) . . . . ?
P1B C24B C29B C28B 176.4(2) . . . . ?
C27B C28B C29B C24B 0.7(5) . . . . ?
B2A B1A B5A B9A 60.9(3) . . . . ?
B3A B1A B5A B9A -2.2(3) . . . . ?
B4A B1A B5A B9A -39.6(2) . . . . ?
B6A B1A B5A B9A 97.3(2) . . . . ?
B2A B1A B5A B4A 100.5(3) . . . . ?
B3A B1A B5A B4A 37.3(2) . . . . ?
B6A B1A B5A B4A 136.9(2) . . . . ?
B2A B1A B5A B10A -3.0(3) . . . . ?
B3A B1A B5A B10A -66.2(3) . . . . ?
B4A B1A B5A B10A -103.5(2) . . . . ?
B6A B1A B5A B10A 33.4(2) . . . . ?
B2A B1A B5A B6A -36.4(2) . . . . ?
B3A B1A B5A B6A -99.6(3) . . . . ?
B4A B1A B5A B6A -136.9(2) . . . . ?
C7A C8A B4A B5A 68.2(3) . . . . ?
B9A C8A B4A B5A -39.8(2) . . . . ?
B3A C8A B4A B5A 105.3(2) . . . . ?
C7A C8A B4A B3A -37.1(2) . . . . ?
B9A C8A B4A B3A -145.1(2) . . . . ?
C7A C8A B4A B9A 108.0(3) . . . . ?
B3A C8A B4A B9A 145.1(2) . . . . ?
C7A C8A B4A B1A 6.1(3) . . . . ?
B9A C8A B4A B1A -101.9(2) . . . . ?
B3A C8A B4A B1A 43.3(2) . . . . ?
B9A B5A B4A C8A 37.43(19) . . . . ?
B1A B5A B4A C8A -98.2(2) . . . . ?
B10A B5A B4A C8A 3.1(3) . . . . ?
B6A B5A B4A C8A -59.8(3) . . . . ?
B9A B5A B4A B3A 97.9(2) . . . . ?
B1A B5A B4A B3A -37.7(2) . . . . ?
B10A B5A B4A B3A 63.6(3) . . . . ?
B6A B5A B4A B3A 0.7(3) . . . . ?
B1A B5A B4A B9A -135.6(2) . . . . ?
B10A B5A B4A B9A -34.4(2) . . . . ?
B6A B5A B4A B9A -97.3(2) . . . . ?
B9A B5A B4A B1A 135.6(2) . . . . ?
B10A B5A B4A B1A 101.3(3) . . . . ?
B6A B5A B4A B1A 38.4(2) . . . . ?
B2A B1A B4A C8A -5.6(3) . . . . ?
B3A B1A B4A C8A -42.7(2) . . . . ?
B5A B1A B4A C8A 95.3(2) . . . . ?
B6A B1A B4A C8A 57.0(3) . . . . ?
B2A B1A B4A B5A -100.9(3) . . . . ?
B3A B1A B4A B5A -138.0(2) . . . . ?
B6A B1A B4A B5A -38.3(2) . . . . ?
B2A B1A B4A B3A 37.1(2) . . . . ?
B5A B1A B4A B3A 138.0(2) . . . . ?
B6A B1A B4A B3A 99.7(3) . . . . ?
B2A B1A B4A B9A -62.0(3) . . . . ?
B3A B1A B4A B9A -99.1(2) . . . . ?
B5A B1A B4A B9A 38.9(2) . . . . ?
B6A B1A B4A B9A 0.6(3) . . . . ?
B11A C7A B3A C8A 100.7(3) . . . . ?
B2A C7A B3A C8A 136.6(2) . . . . ?
C8A C7A B3A B2A -136.6(2) . . . . ?
B11A C7A B3A B2A -35.9(3) . . . . ?
C8A C7A B3A B4A -33.9(2) . . . . ?
B11A C7A B3A B4A 66.8(3) . . . . ?
B2A C7A B3A B4A 102.6(2) . . . . ?
C8A C7A B3A B1A -96.0(2) . . . . ?
B11A C7A B3A B1A 4.7(3) . . . . ?
B2A C7A B3A B1A 40.6(2) . . . . ?
B9A C8A B3A C7A -106.1(3) . . . . ?
B4A C8A B3A C7A -141.0(2) . . . . ?
C7A C8A B3A B2A 36.5(2) . . . . ?
B9A C8A B3A B2A -69.6(3) . . . . ?
B4A C8A B3A B2A -104.5(2) . . . . ?
C7A C8A B3A B4A 141.0(2) . . . . ?
B9A C8A B3A B4A 34.9(2) . . . . ?
C7A C8A B3A B1A 97.5(2) . . . . ?
B9A C8A B3A B1A -8.5(3) . . . . ?
B4A C8A B3A B1A -43.4(2) . . . . ?
C8A B4A B3A C7A 31.6(2) . . . . ?
B5A B4A B3A C7A -59.7(3) . . . . ?
B9A B4A B3A C7A 2.6(3) . . . . ?
B1A B4A B3A C7A -97.7(2) . . . . ?
B5A B4A B3A C8A -91.3(2) . . . . ?
B9A B4A B3A C8A -29.0(2) . . . . ?
B1A B4A B3A C8A -129.3(2) . . . . ?
C8A B4A B3A B2A 92.3(2) . . . . ?
B5A B4A B3A B2A 1.0(3) . . . . ?
B9A B4A B3A B2A 63.3(3) . . . . ?
B1A B4A B3A B2A -37.0(2) . . . . ?
C8A B4A B3A B1A 129.3(2) . . . . ?
B5A B4A B3A B1A 38.0(2) . . . . ?
B9A B4A B3A B1A 100.3(2) . . . . ?
B2A B1A B3A C7A -39.9(2) . . . . ?
B4A B1A B3A C7A 98.5(2) . . . . ?
B5A B1A B3A C7A 61.4(3) . . . . ?
B6A B1A B3A C7A -1.8(3) . . . . ?
B2A B1A B3A C8A -95.3(2) . . . . ?
B4A B1A B3A C8A 43.1(2) . . . . ?
B5A B1A B3A C8A 6.0(3) . . . . ?
B6A B1A B3A C8A -57.3(3) . . . . ?
B4A B1A B3A B2A 138.4(2) . . . . ?
B5A B1A B3A B2A 101.3(3) . . . . ?
B6A B1A B3A B2A 38.0(2) . . . . ?
B2A B1A B3A B4A -138.4(2) . . . . ?
B5A B1A B3A B4A -37.1(2) . . . . ?
B6A B1A B3A B4A -100.4(2) . . . . ?
C8A C7A B2A B1A 0.4(3) . . . . ?
B11A C7A B2A B1A 104.1(2) . . . . ?
B3A C7A B2A B1A -41.3(2) . . . . ?
C8A C7A B2A B3A 41.7(2) . . . . ?
B11A C7A B2A B3A 145.4(2) . . . . ?
C8A C7A B2A B6A -62.9(3) . . . . ?
B11A C7A B2A B6A 40.8(2) . . . . ?
B3A C7A B2A B6A -104.6(3) . . . . ?
C8A C7A B2A B11A -103.7(3) . . . . ?
B3A C7A B2A B11A -145.4(2) . . . . ?
B3A B1A B2A C7A 40.6(2) . . . . ?
B4A B1A B2A C7A 3.4(3) . . . . ?
B5A B1A B2A C7A -59.3(3) . . . . ?
B6A B1A B2A C7A -96.1(2) . . . . ?
B4A B1A B2A B3A -37.1(2) . . . . ?
B5A B1A B2A B3A -99.9(3) . . . . ?
B6A B1A B2A B3A -136.7(2) . . . . ?
B3A B1A B2A B6A 136.7(2) . . . . ?
B4A B1A B2A B6A 99.5(2) . . . . ?
B5A B1A B2A B6A 36.8(2) . . . . ?
B3A B1A B2A B11A 99.2(3) . . . . ?
B4A B1A B2A B11A 62.1(3) . . . . ?
B5A B1A B2A B11A -0.7(3) . . . . ?
B6A B1A B2A B11A -37.5(2) . . . . ?
C8A B3A B2A C7A -34.44(19) . . . . ?
B4A B3A B2A C7A -95.6(2) . . . . ?
B1A B3A B2A C7A -132.9(2) . . . . ?
C7A B3A B2A B1A 132.9(2) . . . . ?
C8A B3A B2A B1A 98.4(2) . . . . ?
B4A B3A B2A B1A 37.2(2) . . . . ?
C7A B3A B2A B6A 93.3(2) . . . . ?
C8A B3A B2A B6A 58.9(3) . . . . ?
B4A B3A B2A B6A -2.3(3) . . . . ?
B1A B3A B2A B6A -39.5(2) . . . . ?
C7A B3A B2A B11A 29.5(2) . . . . ?
C8A B3A B2A B11A -4.9(3) . . . . ?
B4A B3A B2A B11A -66.1(3) . . . . ?
B1A B3A B2A B11A -103.3(3) . . . . ?
C7A B2A B6A B10A -0.7(3) . . . . ?
B1A B2A B6A B10A -101.0(3) . . . . ?
B3A B2A B6A B10A -61.9(3) . . . . ?
B11A B2A B6A B10A 37.8(2) . . . . ?
C7A B2A B6A B11A -38.5(2) . . . . ?
B1A B2A B6A B11A -138.8(2) . . . . ?
B3A B2A B6A B11A -99.7(3) . . . . ?
C7A B2A B6A B1A 100.3(2) . . . . ?
B3A B2A B6A B1A 39.1(2) . . . . ?
B11A B2A B6A B1A 138.8(2) . . . . ?
C7A B2A B6A B5A 63.9(3) . . . . ?
B1A B2A B6A B5A -36.4(2) . . . . ?
B3A B2A B6A B5A 2.7(3) . . . . ?
B11A B2A B6A B5A 102.4(2) . . . . ?
C7A B2A B6A I1A -150.4(2) . . . . ?
B1A B2A B6A I1A 109.3(3) . . . . ?
B3A B2A B6A I1A 148.4(2) . . . . ?
B11A B2A B6A I1A -111.9(3) . . . . ?
C7A B2A B6A I1A' -168.0(8) . . . . ?
B1A B2A B6A I1A' 91.7(8) . . . . ?
B3A B2A B6A I1A' 130.8(8) . . . . ?
B11A B2A B6A I1A' -129.5(8) . . . . ?
B3A B1A B6A B2A -38.2(2) . . . . ?
B4A B1A B6A B2A -101.1(3) . . . . ?
B5A B1A B6A B2A -139.0(2) . . . . ?
B2A B1A B6A B10A 105.0(3) . . . . ?
B3A B1A B6A B10A 66.7(3) . . . . ?
B4A B1A B6A B10A 3.9(3) . . . . ?
B5A B1A B6A B10A -34.0(2) . . . . ?
B2A B1A B6A B11A 37.2(2) . . . . ?
B3A B1A B6A B11A -1.0(3) . . . . ?
B4A B1A B6A B11A -63.9(3) . . . . ?
B5A B1A B6A B11A -101.8(2) . . . . ?
B2A B1A B6A B5A 139.0(2) . . . . ?
B3A B1A B6A B5A 100.8(3) . . . . ?
B4A B1A B6A B5A 37.9(2) . . . . ?
B2A B1A B6A I1A -108.3(2) . . . . ?
B3A B1A B6A I1A -146.5(2) . . . . ?
B4A B1A B6A I1A 150.6(2) . . . . ?
B5A B1A B6A I1A 112.7(2) . . . . ?
B2A B1A B6A I1A' -117.9(5) . . . . ?
B3A B1A B6A I1A' -156.2(4) . . . . ?
B4A B1A B6A I1A' 141.0(4) . . . . ?
B5A B1A B6A I1A' 103.0(4) . . . . ?
B9A B5A B6A B2A -65.3(3) . . . . ?
B4A B5A B6A B2A -2.1(3) . . . . ?
B1A B5A B6A B2A 36.2(2) . . . . ?
B10A B5A B6A B2A -106.7(3) . . . . ?
B9A B5A B6A B10A 41.4(2) . . . . ?
B4A B5A B6A B10A 104.6(2) . . . . ?
B1A B5A B6A B10A 142.9(2) . . . . ?
B9A B5A B6A B11A -1.0(3) . . . . ?
B4A B5A B6A B11A 62.2(3) . . . . ?
B1A B5A B6A B11A 100.5(2) . . . . ?
B10A B5A B6A B11A -42.4(2) . . . . ?
B9A B5A B6A B1A -101.5(2) . . . . ?
B4A B5A B6A B1A -38.3(2) . . . . ?
B10A B5A B6A B1A -142.9(2) . . . . ?
B9A B5A B6A I1A 150.4(2) . . . . ?
B4A B5A B6A I1A -146.3(2) . . . . ?
B1A B5A B6A I1A -108.1(3) . . . . ?
B10A B5A B6A I1A 109.0(2) . . . . ?
B9A B5A B6A I1A' 159.5(4) . . . . ?
B4A B5A B6A I1A' -137.3(4) . . . . ?
B1A B5A B6A I1A' -99.0(4) . . . . ?
B10A B5A B6A I1A' 118.1(4) . . . . ?
C7A C8A B9A B5A -62.7(3) . . . . ?
B3A C8A B9A B5A 7.3(3) . . . . ?
B4A C8A B9A B5A 41.4(2) . . . . ?
C7A C8A B9A B4A -104.1(3) . . . . ?
B3A C8A B9A B4A -34.1(2) . . . . ?
C7A C8A B9A B10A 1.4(3) . . . . ?
B3A C8A B9A B10A 71.4(3) . . . . ?
B4A C8A B9A B10A 105.5(2) . . . . ?
C7A C8A B9A P1A 143.8(2) . . . . ?
B3A C8A B9A P1A -146.2(2) . . . . ?
B4A C8A B9A P1A -112.1(2) . . . . ?
B4A B5A B9A C8A -42.0(2) . . . . ?
B1A B5A B9A C8A -2.8(3) . . . . ?
B10A B5A B9A C8A 100.7(2) . . . . ?
B6A B5A B9A C8A 59.9(3) . . . . ?
B1A B5A B9A B4A 39.3(2) . . . . ?
B10A B5A B9A B4A 142.7(2) . . . . ?
B6A B5A B9A B4A 102.0(2) . . . . ?
B4A B5A B9A B10A -142.7(2) . . . . ?
B1A B5A B9A B10A -103.5(2) . . . . ?
B6A B5A B9A B10A -40.8(2) . . . . ?
B4A B5A B9A P1A 106.9(3) . . . . ?
B1A B5A B9A P1A 146.2(2) . . . . ?
B10A B5A B9A P1A -110.3(3) . . . . ?
B6A B5A B9A P1A -151.1(2) . . . . ?
B5A B4A B9A C8A 132.9(2) . . . . ?
B3A B4A B9A C8A 30.6(2) . . . . ?
B1A B4A B9A C8A 93.4(2) . . . . ?
C8A B4A B9A B5A -132.9(2) . . . . ?
B3A B4A B9A B5A -102.3(3) . . . . ?
B1A B4A B9A B5A -39.5(2) . . . . ?
C8A B4A B9A B10A -98.2(2) . . . . ?
B5A B4A B9A B10A 34.7(2) . . . . ?
B3A B4A B9A B10A -67.6(3) . . . . ?
B1A B4A B9A B10A -4.8(3) . . . . ?
C8A B4A B9A P1A 106.2(2) . . . . ?
B5A B4A B9A P1A -120.9(2) . . . . ?
B3A B4A B9A P1A 136.8(2) . . . . ?
B1A B4A B9A P1A -160.5(2) . . . . ?
B2A B6A B10A B9A 57.5(3) . . . . ?
B11A B6A B10A B9A 94.2(2) . . . . ?
B1A B6A B10A B9A -6.6(3) . . . . ?
B5A B6A B10A B9A -40.3(2) . . . . ?
I1A B6A B10A B9A -153.1(2) . . . . ?
I1A' B6A B10A B9A -135.3(8) . . . . ?
B2A B6A B10A B5A 97.9(3) . . . . ?
B11A B6A B10A B5A 134.5(2) . . . . ?
B1A B6A B10A B5A 33.8(2) . . . . ?
I1A B6A B10A B5A -112.8(2) . . . . ?
I1A' B6A B10A B5A -95.0(8) . . . . ?
B2A B6A B10A B11A -36.7(2) . . . . ?
B1A B6A B10A B11A -100.8(3) . . . . ?
B5A B6A B10A B11A -134.5(2) . . . . ?
I1A B6A B10A B11A 112.6(3) . . . . ?
I1A' B6A B10A B11A 130.4(9) . . . . ?
C8A B9A B10A B6A -58.2(3) . . . . ?
B5A B9A B10A B6A 41.3(2) . . . . ?
B4A B9A B10A B6A 7.0(3) . . . . ?
P1A B9A B10A B6A 162.1(2) . . . . ?
C8A B9A B10A B5A -99.5(2) . . . . ?
B4A B9A B10A B5A -34.3(2) . . . . ?
P1A B9A B10A B5A 120.8(2) . . . . ?
C8A B9A B10A B11A 1.8(3) . . . . ?
B5A B9A B10A B11A 101.3(2) . . . . ?
B4A B9A B10A B11A 67.0(3) . . . . ?
P1A B9A B10A B11A -137.9(2) . . . . ?
B9A B5A B10A B6A -132.6(2) . . . . ?
B4A B5A B10A B6A -98.2(3) . . . . ?
B1A B5A B10A B6A -33.8(2) . . . . ?
B4A B5A B10A B9A 34.4(2) . . . . ?
B1A B5A B10A B9A 98.8(2) . . . . ?
B6A B5A B10A B9A 132.6(2) . . . . ?
B9A B5A B10A B11A -93.5(2) . . . . ?
B4A B5A B10A B11A -59.1(3) . . . . ?
B1A B5A B10A B11A 5.3(3) . . . . ?
B6A B5A B10A B11A 39.1(2) . . . . ?
C8A C7A B11A B6A 65.4(3) . . . . ?
B2A C7A B11A B6A -40.2(2) . . . . ?
B3A C7A B11A B6A -5.3(3) . . . . ?
C8A C7A B11A B2A 105.6(3) . . . . ?
B3A C7A B11A B2A 35.0(2) . . . . ?
C8A C7A B11A B10A 5.4(3) . . . . ?
B2A C7A B11A B10A -100.2(3) . . . . ?
B3A C7A B11A B10A -65.3(3) . . . . ?
B2A B6A B11A C7A 40.1(2) . . . . ?
B10A B6A B11A C7A -100.8(2) . . . . ?
B1A B6A B11A C7A 3.5(3) . . . . ?
B5A B6A B11A C7A -59.8(3) . . . . ?
I1A B6A B11A C7A 148.4(2) . . . . ?
I1A' B6A B11A C7A 147.6(3) . . . . ?
B10A B6A B11A B2A -140.8(2) . . . . ?
B1A B6A B11A B2A -36.6(2) . . . . ?
B5A B6A B11A B2A -99.9(3) . . . . ?
I1A B6A B11A B2A 108.3(2) . . . . ?
I1A' B6A B11A B2A 107.5(4) . . . . ?
B2A B6A B11A B10A 140.8(2) . . . . ?
B1A B6A B11A B10A 104.3(3) . . . . ?
B5A B6A B11A B10A 41.0(2) . . . . ?
I1A B6A B11A B10A -110.9(2) . . . . ?
I1A' B6A B11A B10A -111.7(4) . . . . ?
B1A B2A B11A C7A -94.8(3) . . . . ?
B3A B2A B11A C7A -30.7(2) . . . . ?
B6A B2A B11A C7A -132.8(2) . . . . ?
C7A B2A B11A B6A 132.8(2) . . . . ?
B1A B2A B11A B6A 37.9(2) . . . . ?
B3A B2A B11A B6A 102.1(3) . . . . ?
C7A B2A B11A B10A 98.8(2) . . . . ?
B1A B2A B11A B10A 3.9(3) . . . . ?
B3A B2A B11A B10A 68.1(3) . . . . ?
B6A B2A B11A B10A -34.0(2) . . . . ?
B6A B10A B11A C7A 95.8(3) . . . . ?
B9A B10A B11A C7A -4.2(3) . . . . ?
B5A B10A B11A C7A 55.8(3) . . . . ?
B9A B10A B11A B6A -100.0(2) . . . . ?
B5A B10A B11A B6A -40.0(2) . . . . ?
B6A B10A B11A B2A 34.4(2) . . . . ?
B9A B10A B11A B2A -65.6(3) . . . . ?
B5A B10A B11A B2A -5.6(3) . . . . ?
C8B C7B B2B B3B -41.8(3) . . . . ?
B11B C7B B2B B3B -146.2(3) . . . . ?
C8B C7B B2B B1B 0.3(3) . . . . ?
B11B C7B B2B B1B -104.2(3) . . . . ?
B3B C7B B2B B1B 42.1(2) . . . . ?
C8B C7B B2B B6B 63.8(3) . . . . ?
B11B C7B B2B B6B -40.7(2) . . . . ?
B3B C7B B2B B6B 105.6(3) . . . . ?
C8B C7B B2B B11B 104.5(3) . . . . ?
B3B C7B B2B B11B 146.2(3) . . . . ?
B4B B1B B2B C7B -4.1(3) . . . . ?
B5B B1B B2B C7B 59.0(3) . . . . ?
B3B B1B B2B C7B -40.9(2) . . . . ?
B6B B1B B2B C7B 95.7(2) . . . . ?
B4B B1B B2B B3B 36.8(2) . . . . ?
B5B B1B B2B B3B 99.9(3) . . . . ?
B6B B1B B2B B3B 136.6(2) . . . . ?
B4B B1B B2B B6B -99.8(3) . . . . ?
B5B B1B B2B B6B -36.7(2) . . . . ?
B3B B1B B2B B6B -136.6(2) . . . . ?
B4B B1B B2B B11B -61.9(3) . . . . ?
B5B B1B B2B B11B 1.2(3) . . . . ?
B3B B1B B2B B11B -98.7(3) . . . . ?
B6B B1B B2B B11B 37.9(2) . . . . ?
B11B C7B B3B C8B -101.3(3) . . . . ?
B2B C7B B3B C8B -136.6(2) . . . . ?
C8B C7B B3B B2B 136.6(2) . . . . ?
B11B C7B B3B B2B 35.3(3) . . . . ?
C8B C7B B3B B4B 34.3(2) . . . . ?
B11B C7B B3B B4B -67.0(3) . . . . ?
B2B C7B B3B B4B -102.3(3) . . . . ?
C8B C7B B3B B1B 95.8(2) . . . . ?
B11B C7B B3B B1B -5.5(3) . . . . ?
B2B C7B B3B B1B -40.8(2) . . . . ?
B9B C8B B3B C7B 106.0(3) . . . . ?
B4B C8B B3B C7B 140.6(3) . . . . ?
C7B C8B B3B B2B -36.9(2) . . . . ?
B9B C8B B3B B2B 69.1(3) . . . . ?
B4B C8B B3B B2B 103.7(3) . . . . ?
C7B C8B B3B B4B -140.6(3) . . . . ?
B9B C8B B3B B4B -34.6(3) . . . . ?
C7B C8B B3B B1B -97.7(3) . . . . ?
B9B C8B B3B B1B 8.3(3) . . . . ?
B4B C8B B3B B1B 42.9(2) . . . . ?
B1B B2B B3B C7B -132.3(2) . . . . ?
B6B B2B B3B C7B -92.5(3) . . . . ?
B11B B2B B3B C7B -28.4(2) . . . . ?
C7B B2B B3B C8B 34.4(2) . . . . ?
B1B B2B B3B C8B -98.0(2) . . . . ?
B6B B2B B3B C8B -58.1(3) . . . . ?
B11B B2B B3B C8B 5.9(3) . . . . ?
C7B B2B B3B B4B 95.8(3) . . . . ?
B1B B2B B3B B4B -36.6(2) . . . . ?
B6B B2B B3B B4B 3.3(3) . . . . ?
B11B B2B B3B B4B 67.3(3) . . . . ?
C7B B2B B3B B1B 132.3(2) . . . . ?
B6B B2B B3B B1B 39.9(2) . . . . ?
B11B B2B B3B B1B 103.9(3) . . . . ?
B2B B1B B3B C7B 40.6(2) . . . . ?
B4B B1B B3B C7B -98.1(2) . . . . ?
B5B B1B B3B C7B -60.4(3) . . . . ?
B6B B1B B3B C7B 2.7(3) . . . . ?
B2B B1B B3B C8B 95.9(3) . . . . ?
B4B B1B B3B C8B -42.9(2) . . . . ?
B5B B1B B3B C8B -5.2(3) . . . . ?
B6B B1B B3B C8B 57.9(3) . . . . ?
B4B B1B B3B B2B -138.8(3) . . . . ?
B5B B1B B3B B2B -101.1(3) . . . . ?
B6B B1B B3B B2B -38.0(2) . . . . ?
B2B B1B B3B B4B 138.8(3) . . . . ?
B5B B1B B3B B4B 37.7(2) . . . . ?
B6B B1B B3B B4B 100.8(3) . . . . ?
C7B C8B B4B B5B -67.8(3) . . . . ?
B9B C8B B4B B5B 40.1(2) . . . . ?
B3B C8B B4B B5B -105.2(3) . . . . ?
C7B C8B B4B B1B -6.0(3) . . . . ?
B9B C8B B4B B1B 101.8(3) . . . . ?
B3B C8B B4B B1B -43.4(2) . . . . ?
C7B C8B B4B B9B -107.9(3) . . . . ?
B3B C8B B4B B9B -145.2(3) . . . . ?
C7B C8B B4B B3B 37.4(2) . . . . ?
B9B C8B B4B B3B 145.2(3) . . . . ?
B2B B1B B4B C8B 5.9(3) . . . . ?
B5B B1B B4B C8B -95.0(2) . . . . ?
B3B B1B B4B C8B 42.5(2) . . . . ?
B6B B1B B4B C8B -56.6(3) . . . . ?
B2B B1B B4B B5B 100.9(3) . . . . ?
B3B B1B B4B B5B 137.5(3) . . . . ?
B6B B1B B4B B5B 38.4(2) . . . . ?
B2B B1B B4B B9B 62.2(3) . . . . ?
B5B B1B B4B B9B -38.7(2) . . . . ?
B3B B1B B4B B9B 98.8(3) . . . . ?
B6B B1B B4B B9B -0.3(3) . . . . ?
B2B B1B B4B B3B -36.6(2) . . . . ?
B5B B1B B4B B3B -137.5(3) . . . . ?
B6B B1B B4B B3B -99.1(3) . . . . ?
C7B B3B B4B C8B -31.8(2) . . . . ?
B2B B3B B4B C8B -93.1(3) . . . . ?
B1B B3B B4B C8B -129.6(2) . . . . ?
C7B B3B B4B B5B 59.6(3) . . . . ?
C8B B3B B4B B5B 91.4(3) . . . . ?
B2B B3B B4B B5B -1.7(3) . . . . ?
B1B B3B B4B B5B -38.2(2) . . . . ?
C7B B3B B4B B1B 97.8(3) . . . . ?
C8B B3B B4B B1B 129.6(2) . . . . ?
B2B B3B B4B B1B 36.5(2) . . . . ?
C7B B3B B4B B9B -3.0(3) . . . . ?
C8B B3B B4B B9B 28.8(2) . . . . ?
B2B B3B B4B B9B -64.3(3) . . . . ?
B1B B3B B4B B9B -100.8(3) . . . . ?
C8B B4B B5B B9B -37.4(2) . . . . ?
B1B B4B B5B B9B -136.0(2) . . . . ?
B3B B4B B5B B9B -97.8(3) . . . . ?
C8B B4B B5B B1B 98.7(2) . . . . ?
B9B B4B B5B B1B 136.0(2) . . . . ?
B3B B4B B5B B1B 38.2(2) . . . . ?
C8B B4B B5B B6B 60.0(3) . . . . ?
B1B B4B B5B B6B -38.6(2) . . . . ?
B9B B4B B5B B6B 97.4(3) . . . . ?
B3B B4B B5B B6B -0.4(3) . . . . ?
C8B B4B B5B B10B -3.4(3) . . . . ?
B1B B4B B5B B10B -102.0(3) . . . . ?
B9B B4B B5B B10B 34.0(2) . . . . ?
B3B B4B B5B B10B -63.8(3) . . . . ?
B2B B1B B5B B9B -61.4(3) . . . . ?
B4B B1B B5B B9B 39.1(2) . . . . ?
B3B B1B B5B B9B 1.3(3) . . . . ?
B6B B1B B5B B9B -97.7(3) . . . . ?
B2B B1B B5B B4B -100.5(3) . . . . ?
B3B B1B B5B B4B -37.8(2) . . . . ?
B6B B1B B5B B4B -136.8(3) . . . . ?
B2B B1B B5B B6B 36.3(2) . . . . ?
B4B B1B B5B B6B 136.8(3) . . . . ?
B3B B1B B5B B6B 99.0(3) . . . . ?
B2B B1B B5B B10B 2.6(3) . . . . ?
B4B B1B B5B B10B 103.1(3) . . . . ?
B3B B1B B5B B10B 65.3(3) . . . . ?
B6B B1B B5B B10B -33.7(2) . . . . ?
C7B B2B B6B B10B 0.0(3) . . . . ?
B3B B2B B6B B10B 61.0(3) . . . . ?
B1B B2B B6B B10B 100.6(3) . . . . ?
B11B B2B B6B B10B -37.8(2) . . . . ?
C7B B2B B6B B5B -64.5(3) . . . . ?
B3B B2B B6B B5B -3.5(3) . . . . ?
B1B B2B B6B B5B 36.1(2) . . . . ?
B11B B2B B6B B5B -102.3(3) . . . . ?
C7B B2B B6B B1B -100.6(3) . . . . ?
B3B B2B B6B B1B -39.7(2) . . . . ?
B11B B2B B6B B1B -138.5(3) . . . . ?
C7B B2B B6B B11B 37.9(2) . . . . ?
B3B B2B B6B B11B 98.8(3) . . . . ?
B1B B2B B6B B11B 138.5(3) . . . . ?
C7B B2B B6B I1B' 124.1(6) . . . . ?
B3B B2B B6B I1B' -174.9(6) . . . . ?
B1B B2B B6B I1B' -135.2(6) . . . . ?
B11B B2B B6B I1B' 86.3(6) . . . . ?
C7B B2B B6B I1B 151.0(2) . . . . ?
B3B B2B B6B I1B -148.1(2) . . . . ?
B1B B2B B6B I1B -108.4(3) . . . . ?
B11B B2B B6B I1B 113.1(3) . . . . ?
B9B B5B B6B B2B 65.4(3) . . . . ?
B4B B5B B6B B2B 2.4(3) . . . . ?
B1B B5B B6B B2B -36.0(2) . . . . ?
B10B B5B B6B B2B 106.9(3) . . . . ?
B9B B5B B6B B10B -41.5(2) . . . . ?
B4B B5B B6B B10B -104.5(3) . . . . ?
B1B B5B B6B B10B -142.9(2) . . . . ?
B9B B5B B6B B1B 101.4(2) . . . . ?
B4B B5B B6B B1B 38.4(2) . . . . ?
B10B B5B B6B B1B 142.9(2) . . . . ?
B9B B5B B6B B11B 0.7(3) . . . . ?
B4B B5B B6B B11B -62.3(3) . . . . ?
B1B B5B B6B B11B -100.7(3) . . . . ?
B10B B5B B6B B11B 42.2(2) . . . . ?
B9B B5B B6B I1B' -126.1(7) . . . . ?
B4B B5B B6B I1B' 170.9(7) . . . . ?
B1B B5B B6B I1B' 132.5(7) . . . . ?
B10B B5B B6B I1B' -84.6(7) . . . . ?
B9B B5B B6B I1B -151.9(2) . . . . ?
B4B B5B B6B I1B 145.1(2) . . . . ?
B1B B5B B6B I1B 106.7(3) . . . . ?
B10B B5B B6B I1B -110.5(3) . . . . ?
B4B B1B B6B B2B 100.9(3) . . . . ?
B5B B1B B6B B2B 139.1(3) . . . . ?
B3B B1B B6B B2B 38.0(2) . . . . ?
B2B B1B B6B B10B -105.1(3) . . . . ?
B4B B1B B6B B10B -4.2(3) . . . . ?
B5B B1B B6B B10B 34.0(2) . . . . ?
B3B B1B B6B B10B -67.1(3) . . . . ?
B2B B1B B6B B5B -139.1(3) . . . . ?
B4B B1B B6B B5B -38.2(2) . . . . ?
B3B B1B B6B B5B -101.1(3) . . . . ?
B2B B1B B6B B11B -37.7(2) . . . . ?
B4B B1B B6B B11B 63.2(3) . . . . ?
B5B B1B B6B B11B 101.4(3) . . . . ?
B3B B1B B6B B11B 0.3(3) . . . . ?
B2B B1B B6B I1B' 92.8(10) . . . . ?
B4B B1B B6B I1B' -166.3(9) . . . . ?
B5B B1B B6B I1B' -128.1(10) . . . . ?
B3B B1B B6B I1B' 130.8(10) . . . . ?
B2B B1B B6B I1B 107.8(2) . . . . ?
B4B B1B B6B I1B -151.3(2) . . . . ?
B5B B1B B6B I1B -113.1(2) . . . . ?
B3B B1B B6B I1B 145.8(2) . . . . ?
C7B C8B B9B B5B 62.2(3) . . . . ?
B3B C8B B9B B5B -7.7(3) . . . . ?
B4B C8B B9B B5B -41.6(2) . . . . ?
C7B C8B B9B B4B 103.7(3) . . . . ?
B3B C8B B9B B4B 33.9(3) . . . . ?
C7B C8B B9B B10B -1.8(3) . . . . ?
B3B C8B B9B B10B -71.7(3) . . . . ?
B4B C8B B9B B10B -105.6(3) . . . . ?
C7B C8B B9B P1B -150.0(2) . . . . ?
B3B C8B B9B P1B 140.1(2) . . . . ?
B4B C8B B9B P1B 106.2(3) . . . . ?
B4B B5B B9B C8B 42.5(2) . . . . ?
B1B B5B B9B C8B 3.6(3) . . . . ?
B6B B5B B9B C8B -59.5(3) . . . . ?
B10B B5B B9B C8B -100.6(3) . . . . ?
B1B B5B B9B B4B -38.9(2) . . . . ?
B6B B5B B9B B4B -102.0(3) . . . . ?
B10B B5B B9B B4B -143.0(2) . . . . ?
B4B B5B B9B B10B 143.0(2) . . . . ?
B1B B5B B9B B10B 104.2(3) . . . . ?
B6B B5B B9B B10B 41.1(2) . . . . ?
B4B B5B B9B P1B -104.2(3) . . . . ?
B1B B5B B9B P1B -143.1(2) . . . . ?
B6B B5B B9B P1B 153.9(2) . . . . ?
B10B B5B B9B P1B 112.8(3) . . . . ?
B5B B4B B9B C8B -132.8(3) . . . . ?
B1B B4B B9B C8B -93.7(3) . . . . ?
B3B B4B B9B C8B -30.4(2) . . . . ?
C8B B4B B9B B5B 132.8(3) . . . . ?
B1B B4B B9B B5B 39.1(2) . . . . ?
B3B B4B B9B B5B 102.3(3) . . . . ?
C8B B4B B9B B10B 98.4(3) . . . . ?
B5B B4B B9B B10B -34.4(2) . . . . ?
B1B B4B B9B B10B 4.7(3) . . . . ?
B3B B4B B9B B10B 68.0(3) . . . . ?
C8B B4B B9B P1B -112.2(3) . . . . ?
B5B B4B B9B P1B 115.1(2) . . . . ?
B1B B4B B9B P1B 154.2(2) . . . . ?
B3B B4B B9B P1B -142.6(2) . . . . ?
B2B B6B B10B B9B -57.1(3) . . . . ?
B5B B6B B10B B9B 40.4(2) . . . . ?
B1B B6B B10B B9B 6.8(3) . . . . ?
B11B B6B B10B B9B -94.1(2) . . . . ?
I1B' B6B B10B B9B 174.9(7) . . . . ?
I1B B6B B10B B9B 152.9(2) . . . . ?
B2B B6B B10B B5B -97.6(3) . . . . ?
B1B B6B B10B B5B -33.6(2) . . . . ?
B11B B6B B10B B5B -134.6(2) . . . . ?
I1B' B6B B10B B5B 134.4(7) . . . . ?
I1B B6B B10B B5B 112.4(3) . . . . ?
B2B B6B B10B B11B 37.0(2) . . . . ?
B5B B6B B10B B11B 134.6(2) . . . . ?
B1B B6B B10B B11B 101.0(3) . . . . ?
I1B' B6B B10B B11B -91.0(7) . . . . ?
I1B B6B B10B B11B -113.0(3) . . . . ?
C8B B9B B10B B6B 58.7(3) . . . . ?
B5B B9B B10B B6B -41.1(2) . . . . ?
B4B B9B B10B B6B -7.1(3) . . . . ?
P1B B9B B10B B6B -154.2(2) . . . . ?
C8B B9B B10B B5B 99.8(2) . . . . ?
B4B B9B B10B B5B 34.0(2) . . . . ?
P1B B9B B10B B5B -113.1(3) . . . . ?
C8B B9B B10B B11B -1.6(3) . . . . ?
B5B B9B B10B B11B -101.4(2) . . . . ?
B4B B9B B10B B11B -67.3(3) . . . . ?
P1B B9B B10B B11B 145.6(2) . . . . ?
B9B B5B B10B B6B 132.5(2) . . . . ?
B4B B5B B10B B6B 98.5(3) . . . . ?
B1B B5B B10B B6B 34.1(2) . . . . ?
B4B B5B B10B B9B -34.0(2) . . . . ?
B1B B5B B10B B9B -98.5(3) . . . . ?
B6B B5B B10B B9B -132.5(2) . . . . ?
B9B B5B B10B B11B 93.4(2) . . . . ?
B4B B5B B10B B11B 59.4(3) . . . . ?
B1B B5B B10B B11B -5.1(3) . . . . ?
B6B B5B B10B B11B -39.1(2) . . . . ?
C8B C7B B11B B6B -65.6(3) . . . . ?
B3B C7B B11B B6B 5.7(3) . . . . ?
B2B C7B B11B B6B 39.7(2) . . . . ?
C8B C7B B11B B2B -105.3(3) . . . . ?
B3B C7B B11B B2B -34.0(3) . . . . ?
C8B C7B B11B B10B -5.6(3) . . . . ?
B3B C7B B11B B10B 65.6(3) . . . . ?
B2B C7B B11B B10B 99.7(3) . . . . ?
B2B B6B B11B C7B -40.1(2) . . . . ?
B10B B6B B11B C7B 100.6(3) . . . . ?
B5B B6B B11B C7B 59.7(3) . . . . ?
B1B B6B B11B C7B -3.3(3) . . . . ?
I1B' B6B B11B C7B -153.9(4) . . . . ?
I1B B6B B11B C7B -147.4(2) . . . . ?
B10B B6B B11B B2B 140.7(2) . . . . ?
B5B B6B B11B B2B 99.8(3) . . . . ?
B1B B6B B11B B2B 36.8(2) . . . . ?
I1B' B6B B11B B2B -113.8(4) . . . . ?
I1B B6B B11B B2B -107.3(3) . . . . ?
B2B B6B B11B B10B -140.7(2) . . . . ?
B5B B6B B11B B10B -40.9(2) . . . . ?
B1B B6B B11B B10B -103.9(3) . . . . ?
I1B' B6B B11B B10B 105.6(4) . . . . ?
I1B B6B B11B B10B 112.0(3) . . . . ?
B3B B2B B11B C7B 29.8(2) . . . . ?
B1B B2B B11B C7B 94.6(3) . . . . ?
B6B B2B B11B C7B 132.9(3) . . . . ?
C7B B2B B11B B6B -132.9(3) . . . . ?
B3B B2B B11B B6B -103.1(3) . . . . ?
B1B B2B B11B B6B -38.3(2) . . . . ?
C7B B2B B11B B10B -98.9(3) . . . . ?
B3B B2B B11B B10B -69.1(3) . . . . ?
B1B B2B B11B B10B -4.3(3) . . . . ?
B6B B2B B11B B10B 34.0(2) . . . . ?
B6B B10B B11B C7B -95.7(3) . . . . ?
B9B B10B B11B C7B 4.2(3) . . . . ?
B5B B10B B11B C7B -56.0(3) . . . . ?
B9B B10B B11B B6B 100.0(2) . . . . ?
B5B B10B B11B B6B 39.7(2) . . . . ?
B6B B10B B11B B2B -34.1(2) . . . . ?
B9B B10B B11B B2B 65.8(3) . . . . ?
B5B B10B B11B B2B 5.6(3) . . . . ?

_refine_diff_density_max         1.789
_refine_diff_density_min         -0.569
_refine_diff_density_rms         0.078

_shelx_res_file                  
;

    C:\Xtals\HAWTHO~1\ALEXAN~1\6-I-9-P\6-I-9-P.res created by SHELXL-2014/7

REM  6-I-9-P in P2(1)/c
REM R1 =  0.0542 for    8858 Fo > 4sig(Fo)  and  0.0553 for all    9134 data
REM    559 parameters refined using      0 restraints
REM Highest difference peak  6.453,  deepest hole -1.457,  1-sigma level  0.144
REM  6-I-9-P in P2(1)/c
REM R1 =  0.0542 for    8858 Fo > 4sig(Fo)  and  0.0552 for all    9134 data
REM    559 parameters refined using      0 restraints
REM Highest difference peak  6.441,  deepest hole -1.478,  1-sigma level  0.143
REM  6-I-9-P in P2(1)/c
REM R1 =  0.0353 for    8858 Fo > 4sig(Fo)  and  0.0364 for all    9134 data
REM    579 parameters refined using      0 restraints
REM Highest difference peak  1.789,  deepest hole -0.573,  1-sigma level  0.080
REM  6-I-9-P in P2(1)/c
REM R1 =  0.0353 for    8858 Fo > 4sig(Fo)  and  0.0364 for all    9134 data
REM    579 parameters refined using      0 restraints
REM Highest difference peak  1.788,  deepest hole -0.573,  1-sigma level  0.080
TITL 6-I-9-P in P2(1)/c
CELL 1.54178 16.2403 22.5110 13.1895 90.000 93.389 90.000
ZERR 8.0000 0.0004 0.0005 0.0003 0.000 0.001 0.000
LATT 1
SYMM -X, 0.5+Y, 0.5-Z
SFAC C H B P I
UNIT 160 200 72 8 8
MERG 2
FMAP 2
GRID
PLAN 20
TEMP -173
SIZE 0.02 0.12 0.5
BOND $H
CONF
L.S. 10
ACTA
WGHT    0.043800    9.514000
FVAR       0.06343   0.82958   0.94763
PART 1
I1A   5    0.084685    0.422289    0.800738    21.00000    0.02839    0.01533 =
         0.06019   -0.00474    0.01659    0.00014
I1B   5    0.610396    0.092138    0.404344    31.00000    0.03230    0.02337 =
         0.06703    0.01174    0.02034    0.00136
PART 0
P1A   4    0.037534    0.136051    0.786874    11.00000    0.02167    0.01748 =
         0.02175   -0.00059    0.00801   -0.00202
P1B   4    0.533805    0.366495    0.291577    11.00000    0.01740    0.02008 =
         0.02538   -0.00139    0.00680   -0.00013
C7A   1    0.181274    0.259217    0.620067    11.00000    0.02333    0.02842 =
         0.02539    0.00014    0.00520   -0.00549
AFIX 153
H7A   2    0.179373    0.244713    0.538735    11.00000   -1.20000
AFIX   0
C8A   1    0.171173    0.204795    0.690466    11.00000    0.02190    0.02419 =
         0.02484   -0.00443    0.00743   -0.00393
AFIX 153
H8A   2    0.160386    0.164397    0.641922    11.00000   -1.20000
AFIX   0
C12A  1    0.110176    0.074697    0.799818    11.00000    0.02527    0.01614 =
         0.02919    0.00059    0.01303   -0.00235
C13A  1    0.168282    0.074581    0.881924    11.00000    0.03043    0.02298 =
         0.03104    0.00068    0.00570    0.00053
AFIX  43
H13A  2    0.166908    0.104739    0.932178    11.00000   -1.20000
AFIX   0
C14A  1    0.228219    0.030522    0.890565    11.00000    0.03263    0.03005 =
         0.03828    0.00891    0.00560    0.00067
AFIX  43
H14A  2    0.268212    0.030995    0.946113    11.00000   -1.20000
AFIX   0
C15A  1    0.229768   -0.013826    0.818776    11.00000    0.03176    0.02683 =
         0.04843    0.00757    0.01669    0.00394
AFIX  43
H15A  2    0.271315   -0.043549    0.824348    11.00000   -1.20000
AFIX   0
C16A  1    0.171371   -0.015155    0.739167    11.00000    0.04031    0.02143 =
         0.04142   -0.00408    0.01938   -0.00005
AFIX  43
H16A  2    0.171915   -0.046544    0.691066    11.00000   -1.20000
AFIX   0
C17A  1    0.110823    0.029314    0.727940    11.00000    0.03118    0.02316 =
         0.03137   -0.00292    0.01018   -0.00419
AFIX  43
H17A  2    0.070960    0.028475    0.672264    11.00000   -1.20000
AFIX   0
C18A  1   -0.035652    0.121424    0.681211    11.00000    0.02575    0.02252 =
         0.02539   -0.00209    0.00482   -0.00164
C19A  1   -0.017644    0.139988    0.583884    11.00000    0.03458    0.04075 =
         0.02806   -0.00065    0.00544   -0.00846
AFIX  43
H19A  2    0.033588    0.158629    0.573115    11.00000   -1.20000
AFIX   0
C20A  1   -0.074939    0.131074    0.503003    11.00000    0.04367    0.04700 =
         0.02592   -0.00182    0.00202   -0.00417
AFIX  43
H20A  2   -0.062941    0.143572    0.436680    11.00000   -1.20000
AFIX   0
C21A  1   -0.149984    0.103814    0.519113    11.00000    0.03601    0.03833 =
         0.03221   -0.00751   -0.00340    0.00504
AFIX  43
H21A  2   -0.189111    0.097831    0.463628    11.00000   -1.20000
AFIX   0
C22A  1   -0.167998    0.085343    0.615577    11.00000    0.02857    0.03011 =
         0.04019   -0.00321   -0.00030   -0.00251
AFIX  43
H22A  2   -0.219241    0.066672    0.626173    11.00000   -1.20000
AFIX   0
C23A  1   -0.110906    0.094229    0.696574    11.00000    0.03127    0.02461 =
         0.03033   -0.00083    0.00546   -0.00440
AFIX  43
H23A  2   -0.123194    0.081712    0.762787    11.00000   -1.20000
AFIX   0
C24A  1   -0.020459    0.135804    0.899078    11.00000    0.01948    0.02340 =
         0.02135    0.00006    0.00557   -0.00230
C25A  1   -0.028962    0.083349    0.954018    11.00000    0.03136    0.02332 =
         0.03442    0.00081    0.01281   -0.00165
AFIX  43
H25A  2   -0.004101    0.047596    0.932796    11.00000   -1.20000
AFIX   0
C26A  1   -0.074215    0.084149    1.040036    11.00000    0.04025    0.03046 =
         0.03854    0.00904    0.01845   -0.00065
AFIX  43
H26A  2   -0.080151    0.048804    1.078276    11.00000   -1.20000
AFIX   0
C27A  1   -0.110788    0.136368    1.070339    11.00000    0.03036    0.04074 =
         0.03157    0.00316    0.01543   -0.00038
AFIX  43
H27A  2   -0.141352    0.136594    1.129568    11.00000   -1.20000
AFIX   0
C28A  1   -0.103284    0.187607    1.015737    11.00000    0.02170    0.03444 =
         0.02997   -0.00286    0.00867    0.00466
AFIX  43
H28A  2   -0.128916    0.223060    1.036977    11.00000   -1.20000
AFIX   0
C29A  1   -0.058298    0.187914    0.929357    11.00000    0.02013    0.02690 =
         0.02523    0.00268    0.00511    0.00134
AFIX  43
H29A  2   -0.053366    0.223397    0.891200    11.00000   -1.20000
AFIX   0
C7B   1    0.697161    0.233132    0.170745    11.00000    0.02954    0.03606 =
         0.03027    0.00124    0.01188    0.00693
AFIX 153
H7B   2    0.697928    0.236701    0.086108    11.00000   -1.20000
AFIX   0
C8B   1    0.677675    0.294448    0.216767    11.00000    0.02278    0.02993 =
         0.03102    0.00477    0.00878    0.00466
AFIX 153
H8B   2    0.665517    0.326934    0.153327    11.00000   -1.20000
AFIX   0
C12B  1    0.487763    0.372088    0.412759    11.00000    0.02000    0.02484 =
         0.02697    0.00118    0.00669    0.00402
C13B  1    0.503577    0.418476    0.480876    11.00000    0.03235    0.02711 =
         0.02784   -0.00010    0.00767   -0.00003
AFIX  43
H13B  2    0.538940    0.450080    0.463727    11.00000   -1.20000
AFIX   0
C14B  1    0.467550    0.418631    0.574367    11.00000    0.03980    0.03432 =
         0.02872   -0.00330    0.00800    0.00550
AFIX  43
H14B  2    0.478427    0.450236    0.620979    11.00000   -1.20000
AFIX   0
C15B  1    0.416098    0.372721    0.598807    11.00000    0.03104    0.03877 =
         0.03071    0.00224    0.01279    0.00907
AFIX  43
H15B  2    0.392232    0.372561    0.662851    11.00000   -1.20000
AFIX   0
C16B  1    0.398959    0.327008    0.531087    11.00000    0.02930    0.03400 =
         0.04148    0.00084    0.01798   -0.00143
AFIX  43
H16B  2    0.362555    0.296016    0.548131    11.00000   -1.20000
AFIX   0
C17B  1    0.434834    0.326219    0.438036    11.00000    0.02777    0.03097 =
         0.03723   -0.00443    0.01309   -0.00269
AFIX  43
H17B  2    0.423383    0.294551    0.391721    11.00000   -1.20000
AFIX   0
C18B  1    0.449004    0.368056    0.196690    11.00000    0.01817    0.01874 =
         0.02797    0.00095    0.00477   -0.00421
C19B  1    0.454761    0.338695    0.105045    11.00000    0.02563    0.02257 =
         0.03137   -0.00003    0.00619    0.00265
AFIX  43
H19B  2    0.501118    0.314272    0.094143    11.00000   -1.20000
AFIX   0
C20B  1    0.392391    0.345182    0.029269    11.00000    0.03780    0.02916 =
         0.02779   -0.00413    0.00294   -0.00177
AFIX  43
H20B  2    0.395578    0.324639   -0.033296    11.00000   -1.20000
AFIX   0
C21B  1    0.325490    0.381576    0.044753    11.00000    0.02936    0.02828 =
         0.03230    0.00334   -0.00296   -0.00336
AFIX  43
H21B  2    0.283323    0.386328   -0.007669    11.00000   -1.20000
AFIX   0
C22B  1    0.319761    0.410949    0.135847    11.00000    0.02318    0.02879 =
         0.04038   -0.00358    0.00509    0.00201
AFIX  43
H22B  2    0.273771    0.435867    0.146056    11.00000   -1.20000
AFIX   0
C23B  1    0.380978    0.404090    0.212215    11.00000    0.02354    0.02743 =
         0.03166   -0.00526    0.00504    0.00114
AFIX  43
H23B  2    0.376765    0.423903    0.275292    11.00000   -1.20000
AFIX   0
C24B  1    0.592638    0.433459    0.268650    11.00000    0.02126    0.02316 =
         0.03254   -0.00700    0.01198   -0.00299
C25B  1    0.570270    0.469300    0.185402    11.00000    0.03022    0.03016 =
         0.03654    0.00077    0.00559   -0.00779
AFIX  43
H25B  2    0.522848    0.459554    0.143045    11.00000   -1.20000
AFIX   0
C26B  1    0.616635    0.519257    0.163564    11.00000    0.04261    0.03155 =
         0.03985    0.00259    0.00959   -0.00893
AFIX  43
H26B  2    0.600684    0.543535    0.106846    11.00000   -1.20000
AFIX   0
C27B  1    0.685296    0.533256    0.224138    11.00000    0.03584    0.02818 =
         0.04213   -0.00629    0.01566   -0.01023
AFIX  43
H27B  2    0.717276    0.567056    0.208718    11.00000   -1.20000
AFIX   0
C28B  1    0.708342    0.498752    0.307175    11.00000    0.02783    0.03172 =
         0.04442   -0.01444    0.00724   -0.00623
AFIX  43
H28B  2    0.755971    0.508989    0.348790    11.00000   -1.20000
AFIX   0
C29B  1    0.662106    0.448719    0.330695    11.00000    0.02945    0.02655 =
         0.03564   -0.00611    0.00547   -0.00132
AFIX  43
H29B  2    0.677845    0.425260    0.388502    11.00000   -1.20000
AFIX   0
B1A   3    0.212113    0.298884    0.813974    11.00000    0.02102    0.02967 =
         0.03297   -0.00665    0.00256   -0.00295
AFIX 153
H1A   2    0.252895    0.322211    0.872736    11.00000   -1.20000
AFIX   0
B5A   3    0.113778    0.269471    0.842537    11.00000    0.02370    0.02311 =
         0.02464   -0.00467    0.00307   -0.00054
AFIX 153
H5A   2    0.090867    0.272538    0.920808    11.00000   -1.20000
AFIX   0
B4A   3    0.195478    0.220972    0.817141    11.00000    0.02288    0.02796 =
         0.02631    0.00094    0.00263    0.00096
AFIX 153
H4A   2    0.226225    0.191497    0.876403    11.00000   -1.20000
AFIX   0
B3A   3    0.251954    0.252598    0.719745    11.00000    0.02120    0.02679 =
         0.03115   -0.00263    0.00344    0.00089
AFIX 153
H3A   2    0.319292    0.243244    0.714389    11.00000   -1.20000
AFIX   0
B2A   3    0.206346    0.321353    0.686143    11.00000    0.01932    0.02446 =
         0.03728   -0.00073    0.00745   -0.00294
AFIX 153
H2A   2    0.244407    0.359349    0.660335    11.00000   -1.20000
AFIX   0
B6A   3    0.119428    0.331831    0.757900    11.00000    0.02172    0.01712 =
         0.03892   -0.00444    0.00707   -0.00079
B9A   3    0.094582    0.208419    0.762401    11.00000    0.02064    0.01872 =
         0.02169   -0.00031    0.00547   -0.00185
B10A  3    0.042518    0.276756    0.733579    11.00000    0.01850    0.02225 =
         0.02899    0.00362    0.00404   -0.00168
AFIX 153
H10A  2   -0.025871    0.274704    0.717095    11.00000   -1.20000
AFIX   0
B11A  3    0.105316    0.306144    0.629857    11.00000    0.02139    0.03027 =
         0.03269    0.00786    0.00298   -0.00392
AFIX 153
H11A  2    0.068611    0.316378    0.557399    11.00000   -1.20000
AFIX   0
B1B   3    0.721204    0.221042    0.376991    11.00000    0.02292    0.02541 =
         0.03320    0.00070    0.00141    0.00212
AFIX 153
H1B   2    0.760732    0.208428    0.446100    11.00000   -1.20000
AFIX   0
B2B   3    0.725718    0.182510    0.261897    11.00000    0.02492    0.02730 =
         0.03673   -0.00193    0.00937    0.00283
AFIX 153
H2B   2    0.769486    0.144452    0.255214    11.00000   -1.20000
AFIX   0
B3B   3    0.761906    0.255939    0.269063    11.00000    0.02120    0.02789 =
         0.04669    0.00480    0.00580    0.00380
AFIX 153
H3B   2    0.828483    0.267885    0.263996    11.00000   -1.20000
AFIX   0
B4B   3    0.696508    0.296016    0.348145    11.00000    0.02442    0.02556 =
         0.03864   -0.00160   -0.00128   -0.00028
AFIX 153
H4B   2    0.720769    0.333840    0.396322    11.00000   -1.20000
AFIX   0
B5B   3    0.618550    0.247393    0.386028    11.00000    0.02676    0.02490 =
         0.02810   -0.00065    0.00616    0.00271
AFIX 153
H5B   2    0.591306    0.252846    0.461523    11.00000   -1.20000
AFIX   0
B6B   3    0.635645    0.176502    0.328828    11.00000    0.02567    0.01827 =
         0.03567    0.00172    0.00973   -0.00059
B9B   3    0.597880    0.295952    0.283171    11.00000    0.01773    0.02334 =
         0.02746   -0.00202    0.00498    0.00191
B10B  3    0.554180    0.222998    0.278211    11.00000    0.02075    0.02566 =
         0.03374   -0.00652    0.00494   -0.00057
AFIX 153
H10B  2    0.486600    0.219301    0.256834    11.00000   -1.20000
AFIX   0
B11B  3    0.626036    0.184638    0.192786    11.00000    0.02939    0.03312 =
         0.03302   -0.01079    0.00422    0.00257
AFIX 153
H11B  2    0.594855    0.163558    0.123827    11.00000   -1.20000
PART 2
AFIX   0
I1A'  5    0.097800    0.415818    0.842335   -21.00000    0.08870    0.06273 =
         0.28761   -0.06757    0.10801   -0.02821
I1B'  5    0.587043    0.086954    0.340121   -31.00000    0.11207    0.09247 =
         0.19326    0.04200   -0.05815   -0.01045
PART 0
H10D  2    0.566584    0.223470    0.192201    11.00000    0.03878
H10C  2    0.049722    0.263403    0.642620    11.00000    0.03271
HKLF 4

REM  6-I-9-P in P2(1)/c
REM R1 =  0.0348 for    8858 Fo > 4sig(Fo)  and  0.0359 for all    9134 data
REM    587 parameters refined using      0 restraints

END

WGHT      0.0406      9.3574

REM Highest difference peak  1.789,  deepest hole -0.569,  1-sigma level  0.078
Q1    1   0.6288  0.0932  0.4740  11.00000  0.05    1.79
Q2    1   0.6104  0.1077  0.1114  11.00000  0.05    1.42
Q3    1   0.0873  0.4072  0.6066  11.00000  0.05    1.02
Q4    1   0.0684  0.4168  0.7087  11.00000  0.05    0.96
Q5    1  -0.0001  0.1372  0.7369  11.00000  0.05    0.81
Q6    1   0.4968  0.3637  0.2414  11.00000  0.05    0.70
Q7    1   0.2004  0.1669  0.6737  11.00000  0.05    0.61
Q8    1   0.7052  0.3303  0.1835  11.00000  0.05    0.53
Q9    1   0.2132  0.2550  0.5642  11.00000  0.05    0.53
Q10   1  -0.0121  0.2939  0.7587  11.00000  0.05    0.51
Q11   1   0.6382  0.0916  0.3536  11.00000  0.05    0.50
Q12   1   0.7318  0.2342  0.1147  11.00000  0.05    0.49
Q13   1   0.6143  0.1432  0.1610  11.00000  0.05    0.48
Q14   1   0.4952  0.2022  0.3016  11.00000  0.05    0.44
Q15   1   0.0902  0.4252  0.8620  11.00000  0.05    0.43
Q16   1   0.7490  0.2930  0.1786  11.00000  0.05    0.40
Q17   1   0.0415  0.4080  0.8054  11.00000  0.05    0.40
Q18   1   0.1252  0.4100  0.9322  11.00000  0.05    0.39
Q19   1   0.0896  0.3425  0.5728  11.00000  0.05    0.38
Q20   1   0.5974  0.0822  0.3199  11.00000  0.05    0.36
;
_shelx_res_checksum              35433

_shelx_hkl_file                  
;
   0   0   1   -0.69    0.02
   0   0   1   -0.76    0.02
   0   0  -1   -0.76    0.02
   0   0  -1   -0.79    0.02
   0   0  -2  604.20   18.79
   0   0  -2  617.25   18.80
   0   0   2  616.83   18.79
   0   0   3    0.20    0.05
   0   0   3    0.09    0.04
   0   0   3    0.09    0.03
   0   0  -3    0.15    0.04
   0   0  -3    0.08    0.04
   0   0   4    1.91    0.10
   0   0  -4    1.91    0.11
   0   0   4    1.86    0.12
   0   0  -4    1.77    0.09
   0   0   4    1.93    0.12
   0   0  -5   -0.09    0.04
   0   0   5   -0.07    0.06
   0   0  -5   -0.04    0.05
   0   0   5   -0.04    0.05
   0   0   6   26.06    0.80
   0   0   6   24.51    0.85
   0   0  -6   24.70    0.86
   0   0   7    0.03    0.06
   0   0   8   44.85    1.42
   0   0   9    0.23    0.08
   0   0  10  137.43    4.23
   0   0  11    0.21    0.09
   0   0 -11    0.12    0.09
   0   0 -12   10.17    0.43
   0   0 -13    0.02    0.10
   0   0 -14    0.13    0.10
   0   0 -15   -0.04    0.09
   0   0 -16    1.43    0.13
   0   1  -1   43.15    1.33
   0   1  -1   41.68    1.33
   0   1   1   42.46    1.33
   0   1   1   43.13    1.33
   0  -1   1   43.39    1.33
   0  -1  -1   43.43    1.33
   0  -1   1   43.76    1.33
   0   1  -2   80.71    2.51
   0   1   2   79.58    2.51
   0   1   2   82.16    2.51
   0   1  -2   81.04    2.50
   0  -1   2   80.41    2.51
   0  -1  -2   82.28    2.51
   0  -1   2   81.71    2.51
   0   1  -3  113.47    3.46
   0   1  -3  111.72    3.46
   0   1  -3  108.76    3.71
   0   1   3  113.31    3.46
   0   1   3  108.85    3.46
   0   1   3  116.69    3.39
   0  -1   3  110.74    3.46
   0  -1   3  113.60    3.46
   0  -1  -3  112.73    3.46
   0  -1   3  110.85    3.39
   0  -1  -3  110.84    3.46
   0   1  -4   14.67    0.49
   0   1  -4   14.73    0.50
   0   1   4   13.82    0.49
   0   1   4   15.12    0.47
   0   1   4   15.00    0.50
   0  -1   4   13.60    0.49
   0  -1  -4   14.38    0.50
   0  -1  -4   14.42    0.49
   0  -1   4   14.72    0.47
   0  -1   4   14.68    0.50
   0   1  -5    5.08    0.22
   0   1  -5    5.44    0.21
   0   1   5    5.35    0.20
   0   1   5    5.27    0.23
   0  -1   5    5.19    0.20
   0  -1   5    5.39    0.23
   0  -1  -5    5.09    0.21
   0  -1  -5    5.37    0.23
   0   1   6    4.77    0.23
   0   1   6    4.90    0.19
   0   1  -6    4.78    0.20
   0  -1   6    4.50    0.23
   0  -1  -6    4.55    0.19
   0  -1   6    4.54    0.19
   0   1   7    7.17    0.27
   0  -1   7    6.88    0.27
   0   1   8   60.44    1.89
   0  -1   8   60.37    1.89
   0   1   9    6.60    0.29
   0  -1   9    6.69    0.29
   0   1  10    0.29    0.09
   0  -1  10    0.24    0.09
   0   1  11   10.85    0.45
   0   1 -11   11.53    0.46
   0   1 -11   11.74    0.48
   0  -1 -11   11.70    0.47
   0  -1  11   11.58    0.46
   0   1 -12    0.71    0.12
   0   1 -12    1.08    0.18
   0  -1 -12    0.78    0.13
   0   1 -13    0.64    0.12
   0  -1 -13    0.77    0.13
   0   1 -14    0.34    0.11
   0  -1 -14    0.24    0.11
   0   1 -15    0.26    0.10
   0  -1 -15    0.18    0.10
   0   1 -16    0.05    0.07
   0  -1 -16    0.02    0.07
   0   2   0    4.56    0.19
   0   2   0    4.42    0.19
   0   2   0    4.91    0.24
   0  -2   0    4.70    0.19
   0  -2   0    4.87    0.19
   0   2   1    4.92    0.17
   0   2   1    4.83    0.17
   0   2  -1    4.83    0.17
   0   2  -1    4.51    0.17
   0  -2  -1    4.70    0.17
   0  -2   1    4.89    0.17
   0  -2   1    4.84    0.17
   0   2  -2    0.72    0.06
   0   2   2    0.87    0.07
   0   2   2    0.75    0.06
   0   2  -2    0.85    0.06
   0  -2  -2    1.00    0.07
   0  -2   2    0.93    0.07
   0  -2  -2    0.84    0.06
   0  -2   2    0.81    0.06
   0   2   3   42.19    1.33
   0   2  -3   42.16    1.33
   0   2  -3   43.85    1.33
   0   2   3   40.66    1.33
   0   2   3   44.06    1.29
   0  -2  -3   42.72    1.33
   0  -2   3   42.83    1.33
   0  -2   3   41.38    1.33
   0  -2  -3   41.94    1.33
   0  -2   3   41.87    1.30
   0  -2  -3   41.66    1.42
   0   2  -4    6.03    0.23
   0   2   4    5.96    0.24
   0   2   4    5.68    0.24
   0   2   4    6.30    0.21
   0  -2  -4    6.11    0.24
   0  -2   4    5.39    0.24
   0  -2   4    6.00    0.21
   0  -2  -4    5.86    0.22
   0  -2   4    6.16    0.24
   0   2   5    6.39    0.23
   0   2   5    6.24    0.27
   0   2  -5    6.55    0.26
   0  -2  -5    6.43    0.25
   0  -2  -5    6.49    0.26
   0  -2   5    6.31    0.27
   0  -2   5    6.36    0.24
   0   2   6    0.41    0.08
   0   2   6    0.29    0.06
   0  -2   6    0.39    0.07
   0  -2  -6    0.35    0.05
   0  -2   6    0.35    0.08
   0   2   7    8.49    0.32
   0  -2   7    8.85    0.33
   0   2   8    6.94    0.29
   0  -2   8    7.04    0.29
   0   2   9    9.31    0.36
   0  -2   9    8.51    0.36
   0   2  10   10.95    0.42
   0   2 -10   10.13    0.43
   0  -2  10   10.84    0.43
   0   2  11    2.68    0.20
   0   2 -11    2.81    0.24
   0   2 -11    2.53    0.19
   0  -2 -11    2.49    0.19
   0  -2  11    2.44    0.21
   0   2 -12    0.17    0.13
   0   2 -12    0.06    0.09
   0  -2 -12    0.07    0.10
   0   2 -13   11.39    0.50
   0   2 -13   11.42    0.47
   0  -2 -13   11.26    0.47
   0   2 -14    0.34    0.11
   0  -2 -14    0.36    0.11
   0   2 -15    2.11    0.17
   0  -2 -15    2.02    0.18
   0   2 -16    0.06    0.06
   0  -2 -16    0.06    0.08
   0   3   0   -0.59    0.06
   0   3   0   -0.66    0.05
   0   3   0   -0.66    0.04
   0  -3   0   -0.68    0.04
   0  -3   0   -0.62    0.05
   0   3  -1    0.85    0.07
   0   3   1    0.81    0.07
   0   3  -1    0.76    0.06
   0   3   1    1.00    0.07
   0  -3   1    0.83    0.06
   0  -3  -1    0.88    0.07
   0  -3   1    0.96    0.07
   0   3  -2  230.16    6.96
   0   3  -2  222.27    6.96
   0   3   2  223.90    6.96
   0  -3  -2  228.74    6.96
   0  -3   2  217.69    6.96
   0  -3  -2  228.79    6.96
   0  -3   2  233.58    6.96
   0   3  -3    8.16    0.29
   0   3   3    7.75    0.29
   0   3  -3    7.88    0.29
   0   3   3    7.82    0.29
   0   3   3    8.33    0.27
   0  -3   3    7.88    0.27
   0  -3  -3    8.30    0.30
   0  -3  -3    8.33    0.29
   0  -3  -3    8.38    0.29
   0  -3   3    8.24    0.29
   0  -3   3    7.67    0.29
   0   3  -4   33.13    1.07
   0   3   4   32.53    1.07
   0   3   4   34.03    1.03
   0  -3   4   33.80    1.07
   0  -3  -4   33.86    1.07
   0  -3  -4   34.26    1.13
   0  -3   4   32.42    1.03
   0  -3   4   31.98    1.07
   0   3  -5    7.40    0.29
   0   3   5    7.63    0.26
   0   3   5    7.35    0.30
   0  -3   5    7.53    0.30
   0  -3  -5    7.48    0.28
   0  -3   5    7.43    0.27
   0  -3  -5    7.14    0.30
   0   3   6   26.43    0.81
   0   3   6   24.82    0.86
   0   3   6   25.19    0.86
   0  -3   6   25.71    0.82
   0  -3  -6   25.65    0.88
   0  -3   6   24.62    0.86
   0   3   7   17.62    0.58
   0  -3   7   16.93    0.58
   0   3   8   92.15    2.81
   0  -3   8   90.21    2.82
   0   3   9    3.96    0.21
   0  -3   9    3.98    0.23
   0   3 -10    0.96    0.13
   0   3  10    0.68    0.11
   0  -3  10    0.68    0.12
   0   3 -11    6.72    0.35
   0   3  11    5.70    0.28
   0   3 -11    6.43    0.32
   0   3 -11    5.32    0.28
   0  -3 -11    5.42    0.29
   0  -3  11    5.55    0.30
   0   3 -12   12.08    0.56
   0   3 -12   11.65    0.50
   0   3 -12   12.05    0.48
   0  -3 -12   11.78    0.49
   0   3 -13    0.92    0.13
   0   3 -13    1.46    0.19
   0  -3 -13    0.91    0.14
   0   3 -14   -0.04    0.13
   0   3 -14    0.16    0.10
   0  -3 -14    0.00    0.10
   0   3 -15    1.05    0.12
   0  -3 -15    1.02    0.13
   0   3 -16    0.87    0.09
   0  -3 -16    0.96    0.11
   0   4   0  435.98   13.64
   0   4   0  445.79   17.51
   0   4   0  448.68   13.64
   0  -4   0  439.18   13.64
   0  -4   0  452.31   13.64
   0   4   1   58.12    1.84
   0   4  -1   55.51    1.84
   0   4  -1   60.27    2.36
   0   4  -1   58.81    1.84
   0   4   1   59.40    1.84
   0  -4   1   58.63    1.84
   0  -4  -1   62.38    1.84
   0  -4  -1   56.58    1.84
   0   4  -2  121.30    3.95
   0   4  -2  129.41    3.96
   0   4   2  127.79    3.96
   0  -4  -2  130.22    3.96
   0  -4   2  125.92    3.96
   0  -4   2  131.94    3.96
   0  -4  -2  129.40    3.96
   0   4  -3   14.22    0.48
   0   4   3   14.18    0.45
   0   4   3   14.28    0.49
   0  -4  -3   14.28    0.49
   0  -4  -3   14.31    0.48
   0  -4   3   13.35    0.48
   0  -4   3   13.73    0.46
   0  -4   3   14.82    0.49
   0  -4  -3   14.29    0.49
   0   4   4    2.75    0.12
   0   4   4    2.94    0.16
   0   4  -4    2.79    0.15
   0  -4   4    2.89    0.13
   0  -4  -4    2.92    0.15
   0  -4  -4    2.86    0.13
   0  -4   4    2.99    0.16
   0   4   5    4.92    0.23
   0   4   5    4.91    0.19
   0   4  -5    4.88    0.22
   0   4   5    4.88    0.20
   0  -4  -5    4.80    0.20
   0  -4  -5    4.88    0.22
   0  -4   5    5.10    0.20
   0  -4   5    5.05    0.23
   0   4   6   30.06    0.92
   0   4   6   27.91    0.97
   0  -4   6   28.87    0.92
   0  -4  -6   29.58    0.99
   0  -4   6   27.87    0.97
   0   4   7    3.17    0.16
   0  -4   7    2.90    0.17
   0   4   8   15.25    0.53
   0  -4   8   15.14    0.54
   0   4   9   72.83    2.28
   0  -4   9   73.22    2.29
   0   4 -10   49.50    1.72
   0   4  10   52.25    1.61
   0   4 -10   49.58    1.63
   0  -4  10   50.65    1.63
   0   4 -11    4.32    0.25
   0   4  11    4.66    0.25
   0   4 -11    4.90    0.32
   0   4 -11    4.73    0.28
   0  -4  11    4.72    0.27
   0  -4 -11    4.19    0.26
   0   4 -12    3.56    0.30
   0   4 -12    2.71    0.21
   0   4 -12    3.04    0.26
   0  -4 -12    2.69    0.23
   0   4 -13    0.54    0.11
   0   4 -13    0.71    0.16
   0   4 -13    0.74    0.17
   0  -4 -13    0.51    0.13
   0   4 -14    2.16    0.19
   0   4 -14    2.79    0.24
   0  -4 -14    2.72    0.22
   0   4 -15    2.31    0.17
   0  -4 -15    2.23    0.19
   0  -4 -16    2.90    0.17
   0   5   0   -0.14    0.06
   0   5   0   -0.02    0.06
   0  -5   0   -0.14    0.06
   0  -5   0   -0.15    0.05
   0  -5   0   -0.14    0.06
   0   5  -1  212.64    6.60
   0   5   1  218.46    6.60
   0   5   1  209.75    6.60
   0   5  -1  198.96    6.60
   0   5  -1  216.62    8.47
   0  -5  -1  214.66    6.60
   0  -5  -1  220.55    8.47
   0  -5  -1  214.88    6.60
   0  -5   1  219.36    6.60
   0   5  -2  106.92    3.21
   0   5   2  100.31    3.21
   0   5   2  104.16    3.21
   0   5  -2   98.20    3.20
   0  -5  -2  106.49    3.21
   0  -5   2   97.19    3.20
   0  -5  -2  104.04    3.21
   0  -5   2  107.00    3.21
   0   5  -3   61.00    1.85
   0   5   3   57.59    1.85
   0   5   3   58.27    1.79
   0  -5   3   59.78    1.86
   0  -5   3   55.42    1.85
   0  -5  -3   58.82    1.85
   0  -5  -3   59.70    1.97
   0   5   4    0.32    0.07
   0   5   4    0.44    0.06
   0   5  -4    0.42    0.07
   0   5   4    0.51    0.05
   0  -5  -4    0.42    0.07
   0  -5   4    0.47    0.06
   0  -5   4    0.44    0.07
   0  -5  -4    0.54    0.06
   0   5   5    1.18    0.10
   0   5   5    1.31    0.12
   0   5   5    1.23    0.09
   0  -5  -5    1.44    0.10
   0  -5   5    1.45    0.11
   0  -5  -5    1.43    0.12
   0  -5   5    1.45    0.13
   0   5   6    1.11    0.09
   0   5   6    1.19    0.11
   0  -5   6    1.28    0.11
   0  -5  -6    1.36    0.10
   0   5   7    5.45    0.23
   0  -5   7    5.36    0.24
   0   5   8    0.82    0.10
   0  -5   8    0.91    0.11
   0   5   9    3.38    0.20
   0  -5   9    3.69    0.22
   0   5 -10    0.40    0.11
   0   5 -10    0.58    0.14
   0   5  10    0.38    0.10
   0  -5 -10    0.59    0.11
   0  -5 -10    0.48    0.11
   0  -5  10    0.43    0.11
   0   5 -11   18.60    0.69
   0   5 -11   18.72    0.69
   0   5 -11   18.57    0.73
   0  -5  11   18.39    0.69
   0  -5 -11   18.94    0.70
   0   5 -12    9.55    0.47
   0   5 -12   10.19    0.42
   0   5 -12    9.97    0.44
   0  -5 -12   10.00    0.45
   0   5 -13    2.64    0.21
   0   5 -13    2.78    0.26
   0   5 -13    2.58    0.22
   0  -5 -13    3.06    0.24
   0   5 -14   -0.07    0.11
   0   5 -14    0.05    0.09
   0  -5 -14    0.05    0.11
   0   5 -15    0.43    0.09
   0  -5 -15    0.54    0.11
   0   6   0  531.61   15.90
   0   6   0  501.36   15.60
   0   6   0  515.03   15.90
   0  -6   0  531.48   15.90
   0  -6   0  506.70   15.90
   0   6   1   63.47    2.01
   0   6  -1   66.87    2.58
   0   6  -1   65.25    2.02
   0   6  -1   58.08    2.01
   0  -6  -1   64.74    2.57
   0  -6   1   64.60    2.02
   0  -6  -1   63.76    2.02
   0  -6  -1   66.19    2.02
   0  -6   1   59.30    2.01
   0   6   2    6.86    0.23
   0   6   2    6.77    0.28
   0   6  -2    7.14    0.28
   0  -6   2    7.03    0.28
   0  -6  -2    6.07    0.27
   0  -6   2    6.32    0.27
   0   6   3   51.73    1.66
   0   6   3   49.12    1.71
   0   6   3   52.41    1.59
   0   6  -3   53.88    1.66
   0  -6   3   53.92    1.67
   0  -6  -3   51.02    1.66
   0   6   4   48.29    1.58
   0   6  -4   49.73    1.58
   0   6   4   49.18    1.51
   0   6   4   48.30    1.63
   0  -6  -4   50.02    1.67
   0  -6   4   50.10    1.59
   0  -6  -4   50.56    1.58
   0  -6   4   47.83    1.53
   0   6   5    1.26    0.13
   0   6   5    1.34    0.11
   0   6   5    1.28    0.09
   0  -6  -5    1.33    0.10
   0  -6   5    1.19    0.12
   0  -6   5    1.20    0.10
   0   6   6    7.11    0.27
   0   6   6    7.07    0.29
   0  -6  -6    7.11    0.29
   0  -6   6    7.42    0.29
   0   6   7   17.15    0.63
   0   6   7   17.86    0.59
   0  -6   7   17.83    0.61
   0   6   8    1.36    0.12
   0  -6   8    1.06    0.12
   0   6   9    0.93    0.11
   0  -6   9    1.06    0.14
   0   6 -10   31.83    1.15
   0   6 -10   31.98    1.08
   0   6 -10   33.37    1.12
   0  -6 -10   31.69    1.13
   0  -6 -10   31.96    1.29
   0  -6  10   32.80    1.10
   0   6 -11   14.18    0.58
   0   6 -11   13.35    0.52
   0   6 -11   13.38    0.54
   0  -6 -11   13.77    0.60
   0  -6 -11   13.03    0.54
   0  -6  11   13.13    0.54
   0   6 -12    4.39    0.29
   0   6 -12    4.13    0.25
   0   6 -12    4.76    0.31
   0  -6 -12    3.57    0.27
   0   6 -13    4.31    0.29
   0   6 -13    4.33    0.24
   0   6 -13    4.08    0.27
   0  -6 -13    3.95    0.28
   0   6 -14    0.31    0.12
   0   6 -14    0.36    0.10
   0   6 -14    0.32    0.12
   0  -6 -14    0.26    0.12
   0   6 -15    1.13    0.11
   0   6 -15    1.31    0.12
   0  -6 -15    1.16    0.13
   0   7   0    0.37    0.05
   0   7   0    0.21    0.08
   0  -7   0    0.10    0.07
   0  -7   0    0.11    0.07
   0   7   1   27.50    0.90
   0   7   1   27.15    0.83
   0   7  -1   27.18    1.14
   0   7  -1   26.42    0.89
   0  -7  -1   23.24    1.12
   0  -7   1   27.93    0.90
   0  -7  -1   27.39    0.90
   0  -7   1   24.91    0.89
   0   7  -2   36.40    1.45
   0   7  -2   35.14    1.13
   0   7   2   34.04    1.13
   0   7   2   31.97    1.16
   0   7   2   34.36    1.06
   0  -7   2   34.57    1.14
   0   7   3  239.26    7.17
   0   7   3  222.89    7.67
   0   7  -3  241.21    7.34
   0  -7   3  242.43    7.35
   0  -7  -3  240.64    7.34
   0   7   4    2.28    0.15
   0   7   4    2.34    0.17
   0   7   4    2.43    0.12
   0  -7   4    2.49    0.17
   0  -7  -4    2.34    0.14
   0  -7   4    2.36    0.14
   0  -7  -4    2.26    0.15
   0   7   5    6.87    0.29
   0   7   5    6.91    0.26
   0  -7   5    7.35    0.29
   0  -7  -5    7.11    0.29
   0  -7   5    7.08    0.32
   0   7   6    0.24    0.07
   0   7   6    0.52    0.07
   0  -7  -6    0.44    0.07
   0  -7   6    0.45    0.09
   0   7   7   71.82    2.43
   0   7   7   73.85    2.27
   0  -7   7   74.81    2.30
   0   7   8   20.66    0.70
   0  -7   8   19.91    0.71
   0   7  -9   27.16    0.91
   0  -7   9   25.84    0.91
   0   7 -10    0.18    0.12
   0   7 -10    0.07    0.08
   0   7 -10    0.24    0.11
   0  -7 -10    0.17    0.10
   0  -7  10    0.18    0.10
   0  -7 -10    0.16    0.10
   0   7 -11    6.64    0.31
   0   7 -11    6.28    0.34
   0   7 -11    5.67    0.35
   0  -7 -11    6.56    0.33
   0  -7  11    6.06    0.33
   0  -7 -11    6.57    0.35
   0   7 -12    9.11    0.43
   0   7 -12    9.70    0.40
   0   7 -12    9.12    0.45
   0  -7 -12    9.64    0.46
   0  -7 -12    9.00    0.42
   0   7 -13    6.49    0.30
   0   7 -13    6.14    0.33
   0   7 -13    6.03    0.34
   0  -7 -13    5.98    0.33
   0   7 -14    0.00    0.11
   0   7 -14    0.02    0.11
   0   7 -14    0.09    0.08
   0  -7 -14   -0.02    0.10
   0   7 -15    3.35    0.18
   0   7 -15    3.60    0.19
   0  -7 -15    3.61    0.21
   0   8   0   25.00    0.84
   0   8   0   23.72    0.77
   0   8   0   24.56    0.84
   0  -8   0   24.44    0.84
   0   8   1  134.41    4.06
   0   8  -1  139.43    5.35
   0   8   1  136.81    4.35
   0   8  -1  135.46    4.18
   0   8  -1  134.19    4.34
   0   8   1  132.00    4.18
   0  -8  -1  133.45    4.46
   0  -8  -1  133.06    4.18
   0  -8   1  124.49    4.46
   0   8  -2    4.95    0.31
   0   8   2    4.50    0.24
   0   8  -2    4.57    0.24
   0   8   2    4.73    0.18
   0   8   2    4.84    0.22
   0  -8   2    4.78    0.25
   0   8  -3  104.47    3.97
   0   8   3   92.11    3.20
   0   8   3   97.21    2.98
   0   8   3   95.70    3.09
   0   8  -3   97.09    3.09
   0  -8   3  100.78    3.10
   0   8   4    0.69    0.10
   0   8   4    0.74    0.07
   0  -8   4    0.62    0.09
   0  -8  -4    0.66    0.08
   0  -8   4    0.65    0.11
   0   8   5    0.44    0.09
   0   8   5    0.41    0.06
   0  -8  -5    0.33    0.07
   0  -8   5    0.32    0.08
   0   8   6    5.76    0.27
   0   8   6    5.95    0.24
   0   8  -6    5.30    0.28
   0  -8   6    5.87    0.27
   0  -8  -6    5.98    0.26
   0   8   7   12.26    0.48
   0  -8   7   12.11    0.47
   0  -8   8    2.15    0.19
   0   8  -9   45.65    1.53
   0   8  -9   46.09    1.62
   0  -8  -9   49.21    1.86
   0  -8   9   47.09    1.54
   0   8 -10    0.68    0.14
   0   8 -10    0.78    0.12
   0   8 -10    0.62    0.15
   0  -8 -10    0.78    0.14
   0  -8 -10    0.73    0.13
   0  -8  10    0.70    0.14
   0   8 -11   10.30    0.45
   0   8 -11   10.59    0.43
   0   8 -11   11.01    0.49
   0  -8 -11   10.11    0.45
   0  -8 -11   10.19    0.50
   0   8 -12    0.19    0.12
   0   8 -12    0.10    0.09
   0   8 -12    0.14    0.13
   0  -8 -12   -0.13    0.10
   0  -8 -12    0.18    0.12
   0   8 -13    0.53    0.13
   0   8 -13    0.80    0.11
   0   8 -13    0.60    0.14
   0  -8 -13    0.93    0.15
   0   8 -14    1.40    0.13
   0   8 -14    1.26    0.14
   0   8 -14    1.42    0.15
   0  -8 -14    1.44    0.15
   0   8 -15    0.66    0.09
   0  -8 -15    0.83    0.10
   0   9   0   -0.28    0.07
   0   9   0   -0.27    0.04
   0   9   0   -0.24    0.05
   0  -9   0   -0.27    0.06
   0   9   1   32.42    1.08
   0   9   1   32.67    1.09
   0   9  -1   31.98    1.08
   0   9   1   31.20    1.00
   0   9  -1   32.90    1.37
   0   9  -1   32.16    1.08
   0  -9   1   32.94    1.09
   0  -9  -1   30.87    1.10
   0  -9  -1   32.03    1.08
   0   9  -2  152.91    5.12
   0   9  -2  163.59    6.34
   0   9   2  159.76    5.14
   0   9  -2  156.86    4.94
   0   9   2  153.01    4.94
   0   9   2  159.05    4.80
   0  -9   2  161.54    4.96
   0   9   3   10.35    0.41
   0   9   3   10.57    0.36
   0   9  -3   10.71    0.55
   0   9  -3   10.11    0.39
   0  -9   3   10.90    0.44
   0  -9  -3   10.25    0.43
   0   9   4    0.27    0.08
   0   9  -4    0.37    0.13
   0  -9   4    0.21    0.07
   0  -9  -4    0.24    0.07
   0  -9   4    0.22    0.08
   0   9   5   11.70    0.46
   0   9  -5   10.86    0.46
   0  -9   5   11.82    0.43
   0  -9  -5   11.74    0.46
   0   9  -6    1.96    0.18
   0   9   6    2.05    0.17
   0  -9   6    2.08    0.17
   0  -9  -6    2.22    0.16
   0   9  -7    0.52    0.11
   0   9   7    0.53    0.10
   0  -9   7    0.55    0.11
   0   9   8    9.34    0.40
   0  -9   8    9.02    0.40
   0   9  -9    0.58    0.12
   0   9  -9    0.61    0.15
   0  -9  -9    0.54    0.13
   0  -9  -9    0.46    0.12
   0  -9   9    0.38    0.12
   0   9 -10   10.10    0.44
   0   9 -10   10.55    0.47
   0  -9 -10   10.15    0.50
   0  -9 -10   10.11    0.44
   0  -9  10    9.61    0.45
   0   9 -11    1.29    0.17
   0   9 -11    0.99    0.17
   0  -9 -11    0.91    0.14
   0  -9 -11    0.91    0.15
   0   9 -12    7.96    0.40
   0   9 -12    8.07    0.37
   0   9 -12    7.83    0.38
   0  -9 -12    8.51    0.39
   0  -9 -12    8.50    0.43
   0   9 -13    0.20    0.12
   0   9 -13    0.14    0.11
   0  -9 -13    0.14    0.11
   0   9 -14    0.20    0.10
   0   9 -14    0.15    0.10
   0  -9 -14    0.29    0.10
   0   9 -15   -0.04    0.07
   0  -9 -15    0.01    0.07
   0  10   0  129.84    4.22
   0 -10   0  129.39    4.08
   0  10   1  180.29    5.63
   0  10  -1  188.12    6.02
   0  10   1  187.76    6.02
   0 -10   1  189.11    5.80
   0 -10  -1  183.65    5.80
   0  10  -2    3.54    0.18
   0  10   2    3.79    0.19
   0  10  -2    3.28    0.27
   0 -10   2    3.31    0.22
   0  10  -3   25.39    0.91
   0  10  -3   27.09    1.18
   0  10  -3   25.33    0.88
   0  10   3   26.16    0.91
   0 -10   3   25.27    0.93
   0  10  -4   15.27    0.74
   0  10  -4   13.95    0.55
   0  10   4   14.25    0.55
   0 -10   4   14.19    0.51
   0 -10  -4   14.65    0.56
   0  10  -5    2.78    0.19
   0  10  -5    2.85    0.29
   0  10   5    2.71    0.20
   0 -10  -5    2.71    0.18
   0 -10   5    2.77    0.18
   0  10  -6    2.32    0.19
   0  10   6    2.53    0.20
   0 -10  -6    2.29    0.17
   0 -10   6    2.27    0.18
   0  10  -7   13.06    0.52
   0  10   7   12.95    0.52
   0 -10   7   12.36    0.50
   0  10  -8    1.47    0.16
   0  10   8    1.49    0.16
   0 -10   8    1.52    0.17
   0  10  -9   51.53    1.65
   0  10  -9   51.44    1.74
   0 -10  -9   47.76    1.71
   0 -10  -9   50.13    1.98
   0 -10   9   51.62    1.66
   0  10 -10    4.01    0.29
   0  10 -10    3.90    0.27
   0 -10 -10    3.90    0.25
   0 -10  10    3.84    0.27
   0 -10 -10    4.30    0.30
   0  10 -11   24.47    0.93
   0  10 -11   25.51    0.88
   0 -10 -11   25.46    1.05
   0 -10 -11   24.61    0.91
   0  10 -12    2.00    0.21
   0  10 -12    1.80    0.18
   0 -10 -12    1.76    0.19
   0 -10 -12    1.77    0.17
   0  10 -13    0.29    0.12
   0  10 -13    0.10    0.11
   0 -10 -13    0.22    0.10
   0 -10 -13   -0.06    0.10
   0  10 -14    1.23    0.13
   0  10 -14    1.30    0.13
   0 -10 -14    1.26    0.13
   0  11   0    0.04    0.06
   0 -11   0    0.11    0.08
   0  11   1   66.66    2.12
   0  11  -1   63.29    2.11
   0  11  -1   62.64    2.14
   0 -11   1   63.35    2.09
   0  11  -2   10.27    0.54
   0  11  -2   10.14    0.39
   0  11  -2    9.84    0.41
   0  11   2   10.51    0.41
   0  11  -3  148.88    5.10
   0  11   3  160.38    5.07
   0  11  -3  147.94    5.03
   0  11  -3  164.19    6.33
   0  11   4   67.76    2.26
   0  11  -4   66.60    2.27
   0 -11   4   69.19    2.10
   0 -11  -4   65.95    2.31
   0  11  -5    5.14    0.27
   0  11   5    5.02    0.28
   0 -11   5    5.11    0.25
   0 -11  -5    4.84    0.26
   0  11  -6   32.49    1.16
   0  11   6   32.36    1.16
   0 -11   6   32.99    1.08
   0 -11  -6   32.87    1.18
   0  11   7   48.90    1.68
   0  11  -7   48.61    1.68
   0 -11   7   48.45    1.58
   0  11  -8    1.44    0.16
   0  11   8    1.61    0.18
   0  11  -8    1.68    0.19
   0 -11   8    1.51    0.17
   0 -11  -8    1.21    0.17
   0  11  -9   37.13    1.24
   0  11  -9   35.80    1.18
   0 -11  -9   32.53    1.40
   0 -11   9   36.02    1.19
   0 -11  -9   32.40    1.20
   0  11 -10    0.36    0.14
   0  11 -10    0.45    0.13
   0 -11 -10    0.42    0.11
   0 -11 -10    0.35    0.14
   0 -11  10    0.27    0.11
   0  11 -11    5.61    0.33
   0  11 -11    5.32    0.32
   0  11  11    5.15    0.31
   0 -11 -11    5.80    0.30
   0 -11 -11    5.85    0.35
   0  11 -12    3.22    0.25
   0  11 -12    3.38    0.25
   0 -11 -12    3.51    0.28
   0 -11 -12    3.40    0.23
   0  11 -13    0.19    0.10
   0  11 -13    0.29    0.11
   0 -11 -13    0.34    0.10
   0 -11 -13    0.34    0.12
   0  11 -14    2.96    0.18
   0  11 -14    3.06    0.19
   0 -11 -14    3.29    0.18
   0  12   0  170.59    5.63
   0  12   0  172.50    5.57
   0  12  -1   13.31    0.49
   0  12  -1   12.94    0.50
   0  12   1   13.07    0.50
   0  12   1   13.75    0.50
   0  12  -2    2.31    0.16
   0  12   2    2.01    0.15
   0  12  -2    2.02    0.13
   0  12   2    1.85    0.15
   0  12  -3    9.73    0.38
   0  12   3    9.95    0.41
   0  12  -3   10.29    0.42
   0  12   3   10.32    0.41
   0  12   4   18.89    0.70
   0  12  -4   17.83    0.70
   0 -12   4   18.96    0.64
   0 -12  -4   19.44    0.73
   0  12   5    2.78    0.21
   0  12  -5    2.81    0.20
   0 -12   5    2.53    0.17
   0 -12  -5    2.57    0.20
   0  12   6    1.97    0.19
   0  12  -6    2.30    0.19
   0 -12  -6    2.21    0.19
   0 -12   6    2.18    0.18
   0  12   7    8.23    0.41
   0  12  -7    8.90    0.40
   0  12  -7    8.81    0.38
   0 -12   7    8.50    0.38
   0  12  -8    0.61    0.13
   0  12   8    0.85    0.15
   0  12  -8    0.49    0.12
   0  12  -8    0.59    0.14
   0 -12  -8    0.81    0.15
   0 -12   8    0.52    0.12
   0 -12   8    0.52    0.11
   0  12  -9    1.89    0.19
   0  12  -9    2.36    0.22
   0 -12   9    1.94    0.20
   0 -12  -9    2.18    0.18
   0 -12  -9    2.05    0.22
   0  12 -10    5.95    0.33
   0  12 -10    6.33    0.35
   0 -12 -10    6.38    0.31
   0 -12 -10    6.35    0.38
   0  12 -11    1.23    0.18
   0  12  11    1.47    0.17
   0  12 -11    1.33    0.17
   0 -12 -11    1.09    0.18
   0 -12 -11    1.25    0.14
   0  12 -12    0.34    0.12
   0  12 -12    0.56    0.13
   0 -12 -12    0.22    0.13
   0 -12 -12    0.29    0.10
   0  12 -13    2.76    0.21
   0  12 -13    3.07    0.20
   0 -12 -13    2.70    0.22
   0 -12 -13    2.84    0.18
   0  12 -14    4.16    0.21
   0  12 -14    4.35    0.21
   0 -12 -14    4.71    0.20
   0  13   0    0.55    0.09
   0  13   0    0.09    0.06
   0  13   1   16.32    0.59
   0  13  -1   16.23    0.58
   0  13   1   15.73    0.60
   0  13  -1   16.08    0.60
   0  13  -2   13.78    0.53
   0  13   2   14.25    0.53
   0  13  -2   13.52    0.51
   0  13   2   13.31    0.53
   0  13   3   34.05    1.24
   0  13  -3   36.17    1.25
   0  13  -3   35.25    1.21
   0 -13   3   37.25    1.14
   0  13   4   81.76    2.69
   0  13  -4   80.63    2.71
   0 -13  -4   79.60    2.77
   0 -13   4   80.78    2.50
   0  13  -5    1.26    0.14
   0  13   5    1.39    0.16
   0 -13  -5    1.27    0.15
   0 -13   5    1.39    0.13
   0  13   6   31.35    1.11
   0  13  -6   31.07    1.10
   0 -13  -6   29.29    1.13
   0 -13   6   30.76    1.02
   0  13   7    3.32    0.25
   0  13  -7    2.99    0.24
   0  13  -7    3.29    0.23
   0  13  -7    2.80    0.22
   0  13  -7    3.22    0.25
   0 -13  -7    2.82    0.25
   0 -13   7    3.15    0.21
   0 -13   7    3.07    0.22
   0  13   8    0.90    0.16
   0  13  -8    0.82    0.14
   0  13  -8    0.78    0.15
   0  13  -8    0.48    0.14
   0  13  -8    1.00    0.14
   0 -13   8    0.74    0.13
   0 -13   8    0.62    0.12
   0 -13  -8    0.82    0.16
   0  13  -9    5.62    0.31
   0  13  -9    6.54    0.34
   0 -13  -9    5.33    0.36
   0 -13   9    5.38    0.30
   0  13 -10   14.40    0.58
   0  13 -10   14.42    0.55
   0 -13 -10   13.58    0.65
   0 -13 -10   13.36    0.53
   0  13 -11    1.61    0.18
   0  13 -11    1.86    0.18
   0  13  11    2.18    0.21
   0 -13 -11    1.99    0.21
   0 -13 -11    2.19    0.18
   0  13 -12    1.52    0.17
   0  13 -12    1.18    0.15
   0 -13 -12    1.41    0.13
   0 -13 -12    1.27    0.17
   0  13 -13    1.26    0.14
   0  13 -13    1.14    0.13
   0 -13 -13    1.44    0.15
   0 -13 -13    1.41    0.12
   0  13 -14    2.17    0.14
   0  13 -14    2.41    0.15
   0  14   0   58.55    1.98
   0  14   0   59.93    2.00
   0  14  -1  180.81    5.89
   0  14  -1  174.47    5.82
   0  14   1  178.65    5.88
   0  14   1  182.70    5.83
   0  14  -2   76.98    2.59
   0  14  -2   82.03    2.64
   0  14   2   80.14    2.61
   0  14   2   75.54    2.63
   0  14   3    3.00    0.20
   0  14  -3    3.06    0.21
   0  14   3    3.16    0.20
   0  14  -4    9.98    0.44
   0  14   4   10.62    0.44
   0 -14  -4   10.14    0.45
   0  14   5    0.94    0.14
   0  14  -5    1.02    0.14
   0 -14   5    1.02    0.12
   0 -14  -5    0.88    0.14
   0  14  -6    4.53    0.28
   0  14  -6    4.75    0.28
   0  14  -6    5.46    0.30
   0  14  -6    4.56    0.26
   0  14   6    5.11    0.30
   0 -14   6    4.63    0.27
   0 -14   6    4.58    0.24
   0 -14  -6    4.99    0.31
   0 -14  -6    5.08    0.29
   0  14   7    1.82    0.20
   0  14  -7    2.53    0.23
   0  14  -7    2.43    0.22
   0  14  -7    2.17    0.20
   0  14  -7    2.62    0.21
   0 -14   7    2.06    0.18
   0 -14   7    2.34    0.20
   0 -14  -7    1.80    0.20
   0  14  -8    9.27    0.40
   0  14   8    8.84    0.44
   0  14  -8    9.08    0.42
   0  14  -8    8.90    0.41
   0 -14   8    9.21    0.39
   0 -14  -8    8.59    0.47
   0 -14   8    8.93    0.41
   0  14  -9   24.92    0.92
   0  14  -9   24.61    0.87
   0 -14   9   23.44    0.92
   0 -14  -9   26.08    1.05
   0  14 -10   13.96    0.54
   0  14 -10   13.80    0.57
   0 -14 -10   13.57    0.65
   0  14 -11    1.40    0.16
   0  14 -11    1.17    0.16
   0  14  11    1.26    0.15
   0 -14 -11    1.25    0.18
   0  14  12   10.03    0.43
   0  14 -12   10.53    0.43
   0  14 -12   10.80    0.42
   0 -14 -12   10.44    0.49
   0  14 -13    0.27    0.09
   0  14 -13    0.23    0.09
   0 -14 -13    0.48    0.10
   0  15   0    0.06    0.07
   0  15   0    0.16    0.07
   0  15  -1   40.03    1.39
   0  15   1   42.19    1.40
   0  15   1   40.31    1.42
   0  15  -1   41.30    1.42
   0  15   2   71.76    2.38
   0  15   2   70.62    2.40
   0  15  -2   69.57    2.36
   0  15  -2   73.33    2.41
   0  15   3    8.67    0.38
   0  15  -3    8.44    0.38
   0  15   3    8.57    0.38
   0  15   4   20.51    0.76
   0  15  -4   19.69    0.75
   0 -15  -4   19.94    0.78
   0  15   5   15.85    0.63
   0  15  -5   16.01    0.63
   0  15  -5   15.30    0.57
   0  15  -5   16.16    0.63
   0 -15   5   15.98    0.63
   0 -15  -5   15.44    0.65
   0 -15  -5   15.54    0.69
   0  15  -6    5.98    0.31
   0  15   6    6.68    0.35
   0  15  -6    6.26    0.32
   0  15  -6    6.11    0.29
   0 -15   6    5.81    0.31
   0 -15  -6    5.63    0.34
   0  15  -7   10.50    0.47
   0  15  -7   10.84    0.48
   0  15  -7   10.61    0.44
   0  15   7   11.67    0.51
   0 -15   7   10.57    0.47
   0 -15  -7   11.47    0.53
   0  15  -8   10.72    0.45
   0  15  -8   10.74    0.48
   0  15   8   11.10    0.51
   0  15  -8   11.57    0.48
   0 -15   8   11.18    0.48
   0 -15  -8   11.26    0.54
   0  15  -9   16.01    0.63
   0  15  -9   15.28    0.59
   0 -15   9   15.46    0.62
   0 -15  -9   15.46    0.70
   0  15 -10    1.38    0.17
   0  15 -10    1.13    0.15
   0 -15 -10    1.00    0.17
   0  15  11    0.24    0.10
   0  15 -11    0.27    0.12
   0  15 -11    0.17    0.10
   0 -15 -11    0.12    0.12
   0  15 -12   10.45    0.40
   0  15 -12   10.09    0.42
   0  15  12   10.34    0.43
   0 -15 -12   11.12    0.49
   0  15 -13    2.51    0.16
   0  15 -13    2.37    0.17
   0 -15 -13    2.96    0.18
   0  16   0   24.03    0.89
   0  16   0   25.17    0.88
   0  16   1    2.99    0.19
   0  16   1    2.63    0.20
   0  16  -1    3.09    0.21
   0  16  -1    2.76    0.18
   0  16  -2   12.89    0.51
   0  16   2   11.97    0.50
   0  16  -2   11.72    0.47
   0  16   2   12.04    0.49
   0  16   3    0.61    0.11
   0  16   3    0.50    0.11
   0  16  -3    0.39    0.11
   0 -16   3    0.31    0.09
   0  16  -4   27.63    1.00
   0  16   4   26.69    0.99
   0 -16   4   27.52    1.01
   0 -16  -4   26.70    1.02
   0  16  -5    2.10    0.19
   0  16  -5    2.15    0.18
   0  16   5    2.12    0.20
   0  16  -5    1.82    0.19
   0 -16  -5    1.96    0.19
   0 -16   5    1.96    0.19
   0 -16  -5    2.19    0.20
   0  16  -6   13.33    0.52
   0  16  -6   12.94    0.54
   0  16   6   14.23    0.58
   0  16  -6   13.89    0.57
   0 -16   6   13.77    0.56
   0 -16  -6   13.41    0.61
   0  16  -7    6.21    0.33
   0  16  -7    7.00    0.35
   0  16  -7    6.26    0.31
   0  16   7    6.87    0.37
   0 -16  -7    6.66    0.38
   0 -16   7    6.16    0.33
   0  16   8    2.40    0.23
   0  16  -8    1.99    0.19
   0  16  -8    2.54    0.23
   0  16  -8    2.45    0.20
   0 -16   8    2.67    0.21
   0 -16  -8    2.20    0.24
   0  16  -9    4.70    0.27
   0  16  -9    4.92    0.29
   0 -16   9    4.58    0.26
   0 -16  -9    5.04    0.32
   0  16 -10    0.53    0.12
   0  16 -10    0.43    0.12
   0 -16 -10    0.52    0.14
   0  16 -11    0.47    0.12
   0  16 -11    0.43    0.11
   0  16  11    0.40    0.10
   0 -16 -11    0.61    0.13
   0  16 -12    2.31    0.17
   0  16  12    2.60    0.17
   0  16 -12    2.32    0.18
   0 -16 -12    2.90    0.20
   0  16 -13    0.54    0.08
   0  16 -13    0.63    0.08
   0  17   0    0.16    0.08
   0  17   0    0.04    0.08
   0 -17   0    0.08    0.08
   0  17  -1   43.06    1.47
   0  17  -1   41.63    1.44
   0  17   1   42.81    1.47
   0  17   1   42.62    1.45
   0 -17  -1   41.31    1.51
   0 -17   1   41.40    1.50
   0  17   2    6.79    0.33
   0  17  -2    6.71    0.34
   0  17   2    6.70    0.33
   0  17  -2    6.81    0.31
   0 -17  -2    7.28    0.33
   0 -17   2    7.17    0.33
   0  17  -3   36.62    1.26
   0  17   3   34.90    1.25
   0  17   3   36.17    1.24
   0 -17  -3   32.99    1.26
   0 -17   3   35.03    1.27
   0  17   4   65.50    2.22
   0  17  -4   64.09    2.19
   0  17  -4   68.99    2.24
   0 -17   4   66.55    2.30
   0 -17  -4   65.29    2.29
   0 -17  -4   62.87    2.52
   0  17  -5    2.29    0.19
   0  17   5    1.91    0.20
   0  17  -5    2.42    0.20
   0  17  -5    2.38    0.21
   0 -17  -5    2.10    0.20
   0 -17  -5    1.82    0.19
   0 -17   5    2.23    0.20
   0  17  -6   42.97    1.44
   0  17   6   44.44    1.56
   0  17  -6   44.79    1.56
   0  17  -6   45.06    1.52
   0 -17  -6   43.20    1.75
   0 -17   6   45.77    1.59
   0  17   7    9.90    0.45
   0  17  -7    8.66    0.38
   0  17  -7    9.68    0.43
   0  17  -7    8.78    0.41
   0 -17  -7    9.68    0.47
   0 -17   7    8.82    0.41
   0  17   8    8.13    0.41
   0  17  -8    8.07    0.40
   0  17  -8    9.32    0.40
   0  17  -8    9.09    0.38
   0 -17  -8    8.28    0.44
   0 -17   8    9.28    0.40
   0  17  -9    4.29    0.27
   0  17  -9    4.44    0.25
   0 -17  -9    4.93    0.31
   0 -17   9    4.50    0.26
   0  17 -10    9.42    0.40
   0  17 -10    9.30    0.38
   0 -17 -10    9.44    0.46
   0  17  11    9.54    0.40
   0  17 -11    9.27    0.37
   0  17 -11    9.26    0.39
   0 -17 -11   10.03    0.45
   0  17 -12    0.10    0.08
   0  17  12    0.24    0.07
   0  17 -12    0.18    0.07
   0 -17 -12    0.28    0.09
   0  18   0  230.34    7.51
   0  18   0  225.46    7.43
   0 -18   0  229.59    7.79
   0  18  -1    7.03    0.35
   0  18   1    6.65    0.34
   0  18  -1    6.54    0.32
   0  18   1    6.94    0.33
   0 -18  -1    6.65    0.32
   0 -18   1    7.13    0.33
   0  18   2   23.32    0.88
   0  18  -2   24.43    0.89
   0  18  -2   22.35    0.85
   0  18   2   24.31    0.88
   0 -18  -2   23.29    0.88
   0 -18   2   24.50    0.89
   0  18   3   44.70    1.61
   0  18   3   47.10    1.61
   0  18  -3   48.03    1.63
   0 -18  -3   45.88    1.66
   0 -18  -3   45.09    1.65
   0 -18   3   48.08    1.66
   0  18   4    0.96    0.14
   0  18  -4    0.91    0.15
   0  18  -4    0.96    0.14
   0 -18  -4    1.19    0.15
   0 -18  -4    0.87    0.13
   0 -18   4    0.84    0.12
   0  18   5    2.78    0.24
   0  18  -5    2.74    0.22
   0  18  -5    3.20    0.25
   0 -18   5    2.66    0.21
   0 -18  -5    2.99    0.23
   0 -18  -5    3.14    0.23
   0  18  -6    2.24    0.19
   0  18  -6    2.12    0.20
   0  18   6    1.86    0.19
   0  18  -6    2.46    0.21
   0 -18  -6    2.15    0.22
   0 -18   6    2.53    0.20
   0  18  -7   19.11    0.72
   0  18  -7   18.64    0.74
   0  18   7   18.87    0.75
   0  18  -7   19.63    0.68
   0 -18  -7   19.27    0.82
   0 -18   7   19.51    0.74
   0  18  -8    4.11    0.26
   0  18  -8    4.57    0.27
   0  18  -8    4.15    0.25
   0 -18  -8    5.10    0.30
   0 -18   8    3.80    0.25
   0  18  -9    2.31    0.20
   0  18  -9    2.09    0.17
   0 -18   9    2.27    0.18
   0 -18  -9    2.70    0.23
   0  18 -10   33.30    1.18
   0  18 -10   33.69    1.12
   0 -18 -10   36.45    1.37
   0  18  11    0.24    0.08
   0  18 -11    0.26    0.08
   0  18 -11    0.19    0.09
   0 -18 -11    0.29    0.09
   0  18 -12    8.10    0.31
   0  18 -12    8.07    0.29
   0 -18 -12    8.00    0.35
   0  19   0    0.44    0.11
   0  19   0    0.36    0.10
   0 -19   0    0.45    0.10
   0  19  -1    4.48    0.26
   0  19  -1    4.71    0.28
   0  19   1    4.59    0.27
   0  19   1    4.87    0.28
   0 -19   1    4.50    0.26
   0 -19  -1    4.26    0.25
   0  19  -2   16.17    0.65
   0  19   2   16.66    0.64
   0  19   2   16.17    0.64
   0 -19   2   16.24    0.64
   0 -19  -2   15.17    0.63
   0  19   3   21.28    0.79
   0  19  -3   22.08    0.81
   0  19   3   20.09    0.78
   0 -19   3   21.68    0.80
   0 -19  -3   20.33    0.81
   0 -19  -3   19.74    0.79
   0 -19  -3   20.62    0.86
   0  19   4   15.21    0.61
   0  19  -4   15.29    0.61
   0 -19   4   14.51    0.60
   0 -19  -4   14.36    0.64
   0  19   5   10.58    0.47
   0  19  -5   10.45    0.44
   0  19  -5   11.02    0.48
   0 -19  -5   10.34    0.49
   0 -19   5   10.43    0.46
   0  19  -6    2.87    0.24
   0  19  -6    3.09    0.20
   0  19   6    3.13    0.24
   0  19  -6    3.39    0.23
   0 -19  -6    2.90    0.24
   0 -19   6    3.44    0.23
   0  19  -7    1.41    0.15
   0  19  -7    1.45    0.14
   0  19  -7    1.34    0.16
   0  19   7    1.39    0.17
   0 -19   7    1.53    0.15
   0 -19  -7    1.49    0.17
   0  19  -8    5.40    0.27
   0  19  -8    5.86    0.29
   0  19  -8    5.86    0.30
   0 -19  -8    6.14    0.33
   0 -19   8    5.86    0.29
   0  19  -9    1.23    0.14
   0  19  -9    1.12    0.12
   0 -19   9    1.20    0.12
   0 -19  -9    1.37    0.15
   0  19 -10    0.65    0.11
   0  19  10    0.70    0.10
   0  19 -10    0.73    0.10
   0 -19 -10    1.01    0.13
   0  19 -11    0.48    0.07
   0  19 -11    0.53    0.09
   0  19  11    0.43    0.08
   0 -19 -11    0.65    0.10
   0  20   0   37.58    1.32
   0  20   0   37.29    1.35
   0 -20   0   38.30    1.37
   0  20   1    6.58    0.34
   0  20  -1    5.91    0.31
   0  20   1    6.36    0.32
   0  20  -1    6.00    0.34
   0 -20   1    6.49    0.32
   0 -20  -1    5.67    0.31
   0  20  -2   36.19    1.28
   0  20   2   35.65    1.26
   0  20   2   35.26    1.27
   0 -20  -2   34.45    1.40
   0 -20   2   36.24    1.29
   0 -20  -2   35.77    1.29
   0  20  -3   23.93    0.88
   0  20   3   22.68    0.87
   0  20   3   23.54    0.87
   0 -20  -3   22.44    0.94
   0 -20   3   23.43    0.88
   0 -20  -3   22.48    0.86
   0  20  -4   11.76    0.51
   0  20   4   11.66    0.50
   0 -20  -4   10.69    0.52
   0 -20   4   11.69    0.49
   0  20  -5    1.68    0.19
   0  20  -5    2.03    0.17
   0  20   5    1.70    0.19
   0 -20  -5    1.80    0.19
   0 -20   5    2.06    0.20
   0  20   6    8.22    0.39
   0  20  -6    8.54    0.39
   0  20  -6    7.78    0.35
   0 -20  -6    8.35    0.41
   0 -20   6    7.67    0.37
   0  20  -7    1.40    0.15
   0  20  -7    1.36    0.16
   0  20  -7    1.46    0.13
   0 -20  -7    1.78    0.17
   0 -20   7    1.54    0.15
   0  20  -8    6.45    0.32
   0  20  -8    6.32    0.28
   0  20  -8    6.41    0.30
   0 -20   8    6.59    0.31
   0 -20  -8    6.55    0.34
   0  20  -9    0.62    0.09
   0  20  -9    0.50    0.10
   0 -20  -9    0.76    0.12
   0 -20   9    0.42    0.09
   0  20 -10    1.45    0.14
   0  20 -10    1.53    0.12
   0  20  10    1.81    0.15
   0 -20 -10    1.86    0.15
   0  20 -11    0.09    0.06
   0 -20 -11    0.19    0.07
   0  21   0    0.07    0.10
   0  21   0    0.22    0.10
   0 -21   0    0.22    0.09
   0  21   1    3.82    0.25
   0  21  -1    3.69    0.27
   0  21   1    3.75    0.26
   0 -21   1    3.75    0.24
   0 -21  -1    3.74    0.24
   0  21  -2   30.79    1.10
   0  21   2   28.64    1.07
   0  21   2   29.89    1.08
   0 -21  -2   29.29    1.19
   0 -21   2   30.66    1.11
   0 -21  -2   30.12    1.10
   0  21   3    9.54    0.43
   0  21  -3    9.75    0.44
   0 -21  -3    9.28    0.44
   0 -21   3   10.06    0.43
   0 -21  -3    8.76    0.41
   0  21  -4   11.09    0.49
   0  21   4   11.03    0.48
   0 -21   4   11.65    0.48
   0 -21  -4   10.80    0.51
   0  21  -5   57.79    2.02
   0 -21  -5   58.81    2.27
   0 -21   5   59.98    2.07
   0  21  -6    8.29    0.37
   0  21  -6    8.87    0.40
   0 -21   6    9.11    0.40
   0 -21  -6    9.23    0.43
   0  21  -7    1.41    0.13
   0  21  -7    1.19    0.14
   0 -21  -7    0.99    0.13
   0 -21   7    1.49    0.14
   0  21  -8   12.08    0.45
   0  21  -8   11.89    0.42
   0 -21   8   11.83    0.47
   0 -21  -8   11.99    0.52
   0  21  -9    0.35    0.09
   0  21  -9    0.39    0.07
   0 -21   9    0.29    0.07
   0 -21  -9    0.51    0.10
   0  21 -10    2.09    0.13
   0  21  10    2.15    0.14
   0 -21 -10    1.91    0.15
   0  22   0   45.00    1.61
   0  22   0   48.02    1.64
   0 -22   0   47.87    1.67
   0  22   1    5.32    0.30
   0  22  -1    5.59    0.32
   0  22   1    5.04    0.29
   0 -22  -1    5.39    0.29
   0 -22   1    5.82    0.29
   0  22   2    2.27    0.20
   0  22  -2    2.69    0.23
   0  22   2    2.22    0.20
   0 -22  -2    2.10    0.19
   0 -22   2    2.26    0.20
   0 -22  -2    2.14    0.19
   0  22  -3   12.55    0.53
   0 -22   3   13.57    0.52
   0 -22  -3   12.02    0.55
   0 -22  -3   11.99    0.51
   0  22  -4   10.20    0.45
   0 -22  -4    9.81    0.46
   0 -22   4   10.30    0.44
   0  22  -5    0.22    0.10
   0 -22   5    0.11    0.09
   0 -22  -5    0.15    0.09
   0  22  -6    5.55    0.29
   0 -22   6    4.98    0.27
   0 -22  -6    5.53    0.29
   0  22  -7    3.03    0.19
   0 -22   7    3.13    0.20
   0 -22  -7    3.27    0.21
   0  22  -8    1.42    0.13
   0 -22   8    0.97    0.11
   0 -22  -8    1.38    0.13
   0  22   9    0.89    0.10
   0  22  -9    0.79    0.09
   0 -22  -9    0.89    0.10
   0 -22   9    0.85    0.08
   0  23   0    0.03    0.10
   0 -23   0    0.02    0.08
   0  23  -1    3.05    0.23
   0  23   1    3.04    0.22
   0 -23   1    2.96    0.21
   0 -23  -1    2.73    0.20
   0  23  -2    0.10    0.10
   0  23   2    0.15    0.10
   0 -23   2    0.38    0.10
   0 -23  -2    0.39    0.09
   0 -23  -2    0.38    0.09
   0  23  -3    5.40    0.31
   0 -23  -3    5.55    0.29
   0 -23   3    5.94    0.29
   0  23  -4   25.16    0.91
   0 -23  -4   24.60    0.99
   0 -23   4   24.12    0.91
   0  23  -5   10.78    0.46
   0 -23  -5   10.79    0.48
   0 -23   5   11.56    0.45
   0 -23  -6    6.67    0.32
   0 -23   6    6.59    0.30
   0 -23   7    2.34    0.16
   0 -23  -7    2.33    0.17
   0 -23   8    0.52    0.07
   0 -23  -8    0.65    0.09
   0  23   9    1.48    0.11
   0  24   0   37.30    1.34
   0 -24   0   39.54    1.37
   0  24   1    2.16    0.19
   0  24  -1    2.27    0.20
   0 -24  -1    2.64    0.18
   0 -24   1    2.42    0.19
   0  24  -2    5.19    0.28
   0 -24   2    5.03    0.26
   0 -24  -2    4.92    0.25
   0  24  -3   35.67    1.26
   0 -24   3   36.38    1.28
   0 -24  -3   35.41    1.39
   0 -24  -4    0.33    0.08
   0 -24   4    0.37    0.09
   0 -24   5    0.57    0.09
   0 -24  -5    0.71    0.10
   0 -24  -6    0.20    0.07
   0 -24   6    0.25    0.07
   0 -24  -7   12.41    0.51
   0 -24   7   12.01    0.46
   0  24   8    1.30    0.11
   0 -25   0    0.22    0.08
   0 -25   1    0.03    0.07
   0 -25  -1    0.02    0.07
   0 -25   2    7.70    0.33
   0 -25  -2    7.46    0.32
   0 -25   3   14.82    0.57
   0 -25   4    5.33    0.25
   0 -25  -4    5.05    0.25
   0 -25   5   24.47    0.87
   0 -25  -5   24.14    0.95
   0 -25   6    2.01    0.13
   0 -25  -6    1.87    0.13
   0 -26   0    3.40    0.19
   0 -26   1    1.05    0.11
   0 -26  -1    1.03    0.10
   0 -26   2    1.86    0.14
   0 -26   3    5.06    0.23
   0 -26   4    1.79    0.13
   0 -26   5    0.27    0.06
   0 -27   0   -0.01    0.05
   0 -27   1    2.97    0.16
   0 -27   2    0.17    0.06
   0 -27   3    1.89    0.13
   1   0 -16    1.61    0.14
   1   0 -15   -0.14    0.09
   1   0 -14    8.17    0.37
   1   0 -13   -0.02    0.09
   1   0 -12    7.44    0.35
  -1   0  11    0.02    0.08
   1   0 -11    0.03    0.08
  -1   0  10    0.62    0.11
  -1   0   9    0.28    0.08
  -1   0   8   27.68    0.90
  -1   0   7   -0.02    0.06
  -1   0   7    0.09    0.05
   1   0  -7    0.04    0.05
  -1   0   6    0.90    0.08
  -1   0   6    0.63    0.09
   1   0  -6    0.68    0.07
   1   0  -5    0.54    0.06
  -1   0   5    0.61    0.06
   1   0  -5    0.57    0.07
  -1   0   5    0.66    0.09
  -1   0   5    0.62    0.08
   1   0  -4  324.56   10.14
  -1   0   4  338.96   10.14
  -1   0   4  332.52    9.96
   1   0  -4  324.24   10.91
   1   0  -3    0.03    0.04
  -1   0   3    0.02    0.05
  -1   0   3   -0.02    0.04
  -1   0   3   -0.01    0.03
   1   0  -3    0.04    0.04
   1   0  -3   -0.06    0.04
  -1   0   2   20.03    0.63
  -1   0   2   20.12    0.63
   1   0  -2   18.99    0.62
   1   0  -2   19.82    0.63
   1   0  -1   -0.98    0.01
   1   0  -1   -0.96    0.01
  -1   0   1   -0.97    0.01
  -1   0   1   -0.96    0.01
  -1   0   0    0.18    0.05
   1   0   0    0.21    0.05
   1   0   1   -1.43    0.02
   1   0   1   -1.46    0.02
  -1   0  -1   -1.42    0.02
  -1   0  -1   -1.45    0.02
   1   0   2  188.54    5.73
  -1   0  -2  186.68    5.73
  -1   0  -2  188.94    5.73
   1   0   2  182.09    5.73
   1   0   3    0.53    0.05
   1   0   3    0.43    0.06
  -1   0  -3    0.38    0.05
  -1   0  -3    0.41    0.06
   1   0   3    0.33    0.05
  -1   0  -4    0.01    0.05
   1   0   4    0.10    0.05
   1   0   4    0.16    0.06
  -1   0  -4    0.04    0.05
  -1   0  -5    0.11    0.06
   1   0   5    0.01    0.06
  -1   0  -5    0.07    0.04
   1   0   5    0.16    0.05
   1   0   6  108.58    3.16
  -1   0  -6   97.83    3.23
   1   0   7    0.09    0.06
   1   0   8    0.07    0.07
   1   0   9    0.08    0.08
   1   0  10    5.08    0.26
  -1   0 -11    0.06    0.11
   1   0  11    0.02    0.09
  -1   0 -11   -0.05    0.08
  -1   0 -12    0.65    0.15
  -1   0 -12    0.79    0.12
  -1   0 -13   -0.01    0.09
  -1   0 -14    0.36    0.11
  -1   0 -15    0.12    0.09
  -1   0 -16    7.53    0.30
   1   1 -16    0.55    0.09
   1  -1 -16    0.35    0.09
   1   1 -15    3.69    0.22
   1  -1 -15    3.60    0.23
   1   1 -14    2.12    0.20
   1  -1 -14    1.84    0.17
   1   1 -13    0.86    0.13
   1  -1 -13    0.94    0.14
   1   1 -12    3.82    0.24
   1  -1 -12    3.46    0.24
   1   1 -11    0.24    0.09
  -1   1  11    0.28    0.09
   1  -1 -11    0.23    0.09
  -1  -1  11    0.26    0.10
  -1   1  10    0.30    0.09
  -1  -1  10    0.14    0.08
  -1   1   9    0.17    0.07
  -1  -1   9    0.21    0.08
  -1   1   8    1.81    0.14
  -1  -1   8    1.73    0.14
  -1   1   7   51.26    1.65
  -1   1   7   51.27    1.56
   1   1  -7   49.80    1.70
   1  -1  -7   49.75    1.70
  -1  -1   7   50.44    1.56
  -1  -1   7   48.25    1.63
  -1   1   6   44.08    1.45
  -1   1   6   45.40    1.39
   1   1  -6   44.52    1.52
  -1  -1   6   46.06    1.39
  -1  -1   6   44.69    1.45
   1  -1  -6   44.22    1.52
   1   1  -5  204.53    6.36
  -1   1   5  203.58    6.37
  -1   1   5  214.44    6.23
  -1   1   5  208.94    6.37
   1   1  -5  203.89    6.83
   1  -1  -5  200.87    6.36
  -1  -1   5  211.65    6.24
   1  -1  -5  207.46    6.83
  -1  -1   5  209.00    6.37
  -1  -1   5  195.90    6.37
  -1   1   4   20.00    0.61
   1   1  -4   18.63    0.66
  -1   1   4   19.37    0.64
  -1   1   4   19.43    0.64
   1   1  -4   19.52    0.63
   1  -1  -4   19.20    0.66
  -1  -1   4   18.88    0.64
   1  -1  -4   19.21    0.63
  -1  -1   4   18.52    0.61
  -1  -1   4   19.50    0.64
   1   1  -3   34.11    1.18
   1   1  -3   35.42    1.10
  -1   1   3   35.19    1.11
  -1   1   3   36.02    1.07
   1   1  -3   34.56    1.10
  -1   1   3   35.39    1.11
   1  -1  -3   34.86    1.10
  -1  -1   3   35.36    1.11
  -1  -1   3   36.17    1.11
   1  -1  -3   34.21    1.11
   1  -1  -3   34.47    1.18
  -1  -1   3   34.45    1.07
   1   1  -2   37.61    1.17
   1   1  -2   37.26    1.17
  -1   1   2   38.06    1.17
  -1   1   2   37.98    1.17
  -1  -1   2   38.17    1.17
  -1  -1   2   36.91    1.17
   1  -1  -2   37.52    1.17
   1  -1  -2   36.60    1.17
   1   1  -1   17.59    0.56
  -1   1   1   18.18    0.56
  -1   1   1   18.11    0.57
   1   1  -1   18.11    0.56
  -1  -1   1   16.91    0.56
   1  -1  -1   17.80    0.56
   1  -1  -1   16.86    0.57
  -1  -1   1   18.56    0.56
  -1   1   0    0.51    0.03
   1   1   0    0.52    0.07
  -1   1   0    0.56    0.03
   1  -1   0    0.63    0.03
   1  -1   0    0.55    0.03
  -1  -1   0    0.54    0.02
  -1  -1   0    0.52    0.03
  -1  -1   0    0.43    0.06
   1   1   1    5.32    0.18
  -1   1  -1    5.45    0.18
  -1   1  -1    5.06    0.18
  -1  -1  -1    5.33    0.18
   1  -1   1    5.11    0.18
   1  -1   1    5.13    0.18
  -1  -1  -1    5.44    0.18
   1   1   2    2.49    0.11
  -1   1  -2    2.48    0.11
  -1   1  -2    2.57    0.11
   1   1   2    2.40    0.11
   1  -1   2    2.43    0.11
   1  -1   2    2.56    0.11
  -1  -1  -2    2.72    0.11
  -1  -1  -2    2.64    0.11
  -1   1  -3  158.87    4.92
   1   1   3  159.57    4.92
   1   1   3  163.13    4.83
   1   1   3  151.69    4.92
  -1   1  -3  161.99    4.92
   1  -1   3  154.86    4.92
   1  -1   3  162.75    4.83
   1  -1   3  164.03    4.92
  -1  -1  -3  159.23    4.92
  -1  -1  -3  160.21    4.92
  -1   1  -4   51.82    1.66
   1   1   4   52.76    1.66
   1   1   4   54.41    1.61
  -1   1  -4   52.05    1.66
   1  -1   4   53.12    1.61
  -1  -1  -4   53.02    1.66
  -1  -1  -4   50.39    1.66
   1  -1   4   53.28    1.66
   1   1   5   78.08    2.44
  -1   1  -5   75.97    2.43
   1   1   5   79.55    2.37
  -1  -1  -5   77.00    2.43
  -1  -1  -5   76.04    2.57
   1  -1   5   77.45    2.44
   1  -1   5   77.73    2.37
  -1   1  -6    0.32    0.07
   1   1   6    0.57    0.07
   1  -1   6    0.62    0.07
  -1  -1  -6    0.42    0.08
   1   1   7   16.42    0.56
   1  -1   7   16.37    0.56
   1   1   8    7.27    0.30
   1  -1   8    7.61    0.30
   1   1   9    1.85    0.16
   1  -1   9    1.40    0.14
  -1   1 -10    0.15    0.10
   1   1  10    0.07    0.09
   1  -1  10    0.12    0.09
  -1   1 -11    0.66    0.11
  -1   1 -11    0.57    0.13
   1   1  11    0.45    0.11
   1  -1  11    0.41    0.11
  -1  -1 -11    0.56    0.10
  -1   1 -12    2.63    0.20
  -1   1 -12    2.62    0.22
  -1  -1 -12    2.65    0.21
  -1   1 -13    1.56    0.19
  -1   1 -13    1.78    0.16
  -1  -1 -13    1.74    0.16
  -1   1 -14    0.84    0.13
  -1  -1 -14    1.03    0.14
  -1   1 -15    3.52    0.21
  -1  -1 -15    3.48    0.21
  -1   1 -16    0.54    0.08
  -1  -1 -16    0.62    0.09
   1   2 -16   -0.01    0.07
   1  -2 -16   -0.08    0.07
   1   2 -15    0.89    0.12
   1  -2 -15    0.87    0.13
   1   2 -14    3.17    0.22
   1  -2 -14    3.21    0.23
   1   2 -13   10.06    0.43
   1  -2 -13   10.00    0.44
   1   2 -12    9.96    0.42
   1  -2 -12    9.51    0.42
   1   2 -11    0.48    0.11
  -1   2  11    0.46    0.11
   1   2 -11    0.28    0.13
   1  -2 -11    0.54    0.11
  -1  -2  11    0.52    0.11
  -1   2  10    0.81    0.11
  -1  -2  10    0.80    0.12
  -1   2   9    3.16    0.19
  -1  -2   9    3.32    0.19
  -1   2   8    4.93    0.22
  -1  -2   8    4.53    0.22
  -1   2   7   47.82    1.45
  -1  -2   7   46.72    1.45
  -1  -2   7   44.57    1.52
   1  -2  -7   46.02    1.57
   1   2  -6    1.97    0.12
  -1   2   6    1.85    0.15
  -1   2   6    1.85    0.11
  -1  -2   6    2.01    0.12
   1  -2  -6    1.98    0.12
  -1  -2   6    1.98    0.15
  -1   2   5   92.38    2.89
   1   2  -5   88.67    2.88
   1   2  -5   93.83    3.08
  -1   2   5   95.47    2.81
  -1  -2   5   93.73    2.89
  -1  -2   5   93.35    2.81
   1  -2  -5   89.48    2.88
  -1  -2   5   89.95    2.89
   1  -2  -5   92.71    3.08
   1   2  -4   48.23    1.50
  -1   2   4   46.05    1.51
  -1   2   4   47.87    1.51
  -1   2   4   49.44    1.46
   1   2  -4   46.69    1.60
  -1  -2   4   45.85    1.51
  -1  -2   4   47.91    1.46
  -1  -2   4   48.22    1.51
   1  -2  -4   47.90    1.50
   1  -2  -4   48.09    1.60
  -1   2   3  221.81    6.89
   1   2  -3  219.47    7.41
  -1   2   3  226.91    6.89
   1   2  -3  222.56    6.89
   1   2  -3  221.66    6.89
  -1   2   3  235.31    6.76
  -1  -2   3  218.78    6.89
   1  -2  -3  224.95    6.89
  -1  -2   3  228.55    6.89
   1  -2  -3  223.55    7.41
   1  -2  -3  219.45    6.89
  -1   2   2   77.54    2.43
  -1   2   2   79.27    2.43
   1   2  -2   80.21    2.42
   1   2  -2   77.76    2.60
   1   2  -2   77.17    2.42
   1  -2  -2   76.81    2.43
  -1  -2   2   79.09    2.43
   1  -2  -2   76.44    2.60
   1  -2  -2   78.23    2.42
  -1  -2   2   81.58    2.42
   1   2  -1    0.56    0.08
  -1   2   1    0.55    0.08
   1   2  -1    0.59    0.06
  -1  -2   1    0.63    0.07
   1  -2  -1    0.51    0.07
   1  -2  -1    0.54    0.09
  -1  -2   1    0.57    0.07
   1   2   0   -0.79    0.03
  -1   2   0   -0.75    0.03
   1   2   0   -0.73    0.07
  -1   2   0   -0.79    0.03
   1   2   0   -0.83    0.02
   1  -2   0   -0.81    0.03
   1  -2   0   -0.79    0.03
  -1  -2   0   -0.84    0.06
  -1  -2   0   -0.79    0.03
  -1  -2   0   -0.80    0.03
   1   2   1   43.26    1.36
  -1   2  -1   42.21    1.36
  -1   2  -1   43.99    1.36
   1   2   1   43.38    1.36
   1  -2   1   42.68    1.36
   1  -2   1   43.81    1.36
  -1  -2  -1   46.22    1.36
   1   2   2    1.18    0.07
   1   2   2    1.25    0.08
  -1   2  -2    1.25    0.08
  -1   2  -2    1.18    0.08
  -1  -2  -2    1.36    0.08
   1  -2   2    1.30    0.07
   1  -2   2    1.43    0.08
  -1  -2  -2    1.25    0.08
   1  -2   2    1.25    0.08
   1   2   3   97.39    2.97
   1   2   3   99.18    3.03
   1   2   3   94.42    3.03
  -1   2  -3  100.51    3.04
  -1   2  -3   94.73    3.04
   1  -2   3   99.60    2.97
   1  -2   3  100.74    3.04
  -1  -2  -3   96.32    3.04
   1  -2   3   96.30    3.04
  -1  -2  -3   99.94    3.04
   1   2   4    1.80    0.09
   1   2   4    1.61    0.12
  -1   2  -4    1.54    0.11
  -1   2  -4    1.41    0.12
  -1  -2  -4    1.57    0.11
  -1  -2  -4    1.65    0.12
  -1  -2  -4    1.61    0.08
   1  -2   4    1.55    0.12
   1  -2   4    1.44    0.10
   1   2   5   82.08    2.45
   1   2   5   78.64    2.52
  -1   2  -5   79.10    2.52
   1  -2   5   79.18    2.45
  -1  -2  -5   79.06    2.67
   1  -2   5   80.33    2.52
  -1  -2  -5   82.39    2.52
   1   2   6   11.66    0.39
   1   2   6   10.89    0.40
   1  -2   6   11.01    0.38
  -1  -2  -6   10.51    0.42
   1   2   7   59.24    1.84
   1  -2   7   58.96    1.84
   1   2   8    9.89    0.37
   1  -2   8    9.94    0.38
   1   2   9   12.27    0.45
   1  -2   9   11.54    0.45
   1   2  10    9.91    0.41
  -1   2 -10    9.80    0.40
   1  -2  10   10.26    0.42
  -1   2 -11    9.85    0.42
  -1   2 -11    9.76    0.44
   1   2  11    9.69    0.40
  -1   2 -11    9.18    0.39
  -1  -2 -11    9.56    0.41
   1  -2  11    9.66    0.41
  -1   2 -12    6.59    0.36
  -1   2 -12    5.96    0.30
  -1   2 -12    5.90    0.33
  -1  -2 -12    6.04    0.31
  -1   2 -13    4.61    0.26
  -1   2 -13    4.96    0.32
  -1  -2 -13    4.50    0.27
  -1   2 -14    1.25    0.14
  -1   2 -14    1.41    0.18
  -1  -2 -14    1.29    0.15
  -1   2 -15    1.67    0.14
  -1  -2 -15    1.51    0.14
  -1  -2 -16   -0.01    0.07
   1   3 -16    0.72    0.08
   1  -3 -16    0.73    0.10
   1   3 -15    0.50    0.10
   1  -3 -15    0.66    0.12
   1   3 -14    3.84    0.24
   1  -3 -14    4.00    0.25
   1   3 -13    0.19    0.14
   1   3 -13   -0.03    0.09
   1  -3 -13    0.03    0.11
   1   3 -12   11.20    0.48
   1   3 -12   10.13    0.44
   1  -3 -12   10.52    0.45
   1   3 -11    1.64    0.19
   1   3 -11    1.37    0.14
  -1   3  11    1.94    0.17
  -1  -3  11    1.55    0.16
   1  -3 -11    1.46    0.16
   1   3 -10    1.52    0.16
  -1   3  10    1.21    0.13
  -1  -3  10    1.40    0.15
  -1   3   9    9.59    0.37
  -1  -3   9    9.82    0.38
  -1   3   8    1.94    0.14
  -1  -3   8    1.81    0.14
  -1   3   7   10.09    0.35
   1  -3  -7   10.01    0.38
  -1  -3   7    9.83    0.36
  -1   3   6  105.58    3.10
  -1   3   6   98.04    3.20
  -1  -3   6  102.93    3.11
   1  -3  -6  103.13    3.40
  -1  -3   6   99.09    3.20
   1   3  -5    1.27    0.11
  -1   3   5    1.51    0.13
  -1   3   5    1.53    0.09
  -1  -3   5    1.19    0.11
  -1  -3   5    1.46    0.10
   1  -3  -5    1.42    0.11
   1  -3  -5    1.43    0.10
  -1  -3   5    1.09    0.11
  -1   3   4   49.96    1.63
   1   3  -4   51.26    1.63
  -1   3   4   52.36    1.63
  -1   3   4   52.30    1.57
  -1  -3   4   49.91    1.58
   1  -3  -4   53.82    1.73
   1  -3  -4   51.61    1.63
  -1  -3   4   49.63    1.63
  -1  -3   4   52.22    1.63
  -1   3   3    1.19    0.10
  -1   3   3    1.21    0.09
   1   3  -3    1.20    0.09
  -1   3   3    1.21    0.06
  -1  -3   3    1.10    0.09
   1  -3  -3    1.26    0.08
  -1  -3   3    1.25    0.09
   1  -3  -3    1.08    0.08
   1   3  -2   67.85    2.09
   1   3  -2   66.55    2.08
  -1   3   2   67.41    2.09
   1  -3  -2   67.20    2.24
  -1  -3   2   66.59    2.09
   1  -3  -2   66.79    2.08
  -1  -3   2   69.21    2.09
   1  -3  -2   65.15    2.09
  -1   3   1   -0.80    0.05
  -1   3   1   -0.85    0.03
   1   3  -1   -0.83    0.04
   1   3  -1   -0.80    0.07
   1   3  -1   -0.81    0.03
  -1  -3   1   -0.78    0.04
  -1  -3   1   -0.77    0.03
   1  -3  -1   -0.81    0.05
   1   3   0    0.10    0.04
  -1   3   0    0.09    0.05
  -1   3   0    0.08    0.04
   1   3   0    0.09    0.08
   1   3   0    0.16    0.04
   1  -3   0    0.14    0.05
  -1  -3   0    0.14    0.07
  -1  -3   0    0.10    0.04
  -1  -3   0    0.07    0.04
   1  -3   0    0.10    0.04
   1   3   1    7.57    0.29
  -1   3  -1    8.13    0.30
   1   3   1    7.84    0.29
  -1   3  -1    8.50    0.29
  -1  -3  -1    8.45    0.29
   1  -3   1    8.27    0.30
   1  -3   1    7.92    0.29
  -1  -3  -1    8.47    0.30
   1   3   2   55.94    1.70
   1   3   2   53.45    1.75
  -1   3  -2   58.42    1.75
   1   3   2   56.44    1.74
  -1   3  -2   54.98    1.75
  -1  -3  -2   59.24    1.75
   1  -3   2   56.23    1.75
   1  -3   2   55.31    1.70
  -1  -3  -2   56.60    1.75
   1  -3   2   52.80    1.74
   1   3   3    0.30    0.04
  -1   3  -3    0.21    0.05
  -1   3  -3    0.25    0.05
   1   3   3    0.26    0.05
  -1  -3  -3    0.28    0.05
   1  -3   3    0.23    0.04
  -1  -3  -3    0.29    0.04
   1  -3   3    0.32    0.05
   1  -3   3    0.18    0.05
  -1  -3  -3    0.26    0.06
   1   3   4  234.96    7.33
  -1   3  -4  235.78    7.33
   1   3   4  239.07    7.19
   1  -3   4  233.07    7.19
  -1  -3  -4  239.22    7.33
  -1  -3  -4  237.02    7.34
   1  -3   4  242.40    7.34
  -1  -3  -4  240.58    7.87
  -1   3  -5    0.46    0.07
   1   3   5    0.50    0.06
   1   3   5    0.37    0.06
   1   3   5    0.39    0.07
   1  -3   5    0.30    0.07
   1  -3   5    0.42    0.06
  -1  -3  -5    0.42    0.05
  -1  -3  -5    0.53    0.08
   1   3   6    7.56    0.28
   1   3   6    7.20    0.29
   1  -3   6    7.41    0.28
   1   3   7    0.16    0.07
   1  -3   7    0.12    0.07
   1   3   8    2.80    0.17
   1  -3   8    2.35    0.17
   1   3   9    1.24    0.13
   1  -3   9    1.19    0.13
   1   3  10    5.22    0.27
  -1   3 -10    5.75    0.30
  -1   3 -10    5.43    0.28
   1  -3  10    5.78    0.29
  -1   3 -11    1.72    0.15
  -1   3 -11    1.82    0.17
   1   3  11    1.90    0.17
  -1   3 -11    2.05    0.20
  -1  -3 -11    1.77    0.16
   1  -3  11    2.02    0.19
  -1   3 -12    3.27    0.29
  -1   3 -12    3.67    0.23
  -1   3 -12    3.30    0.26
  -1  -3 -12    3.33    0.24
  -1   3 -13    0.13    0.15
  -1   3 -13    0.33    0.10
  -1   3 -13    0.25    0.13
  -1  -3 -13    0.27    0.12
  -1   3 -14   21.64    0.79
  -1   3 -14   22.12    0.79
  -1  -3 -14   22.54    0.80
  -1   3 -15    0.36    0.09
  -1  -3 -15    0.43    0.11
  -1  -3 -16    0.26    0.08
   1  -4 -16    0.01    0.07
   1   4 -15    0.20    0.09
   1  -4 -15    0.19    0.10
   1   4 -14    3.97    0.24
   1  -4 -14    3.75    0.26
   1   4 -13    1.53    0.19
   1   4 -13    1.73    0.16
   1  -4 -13    1.36    0.17
   1   4 -12    0.02    0.13
   1   4 -12    0.11    0.10
   1  -4 -12    0.03    0.10
   1   4 -11    3.01    0.26
   1   4 -11    2.52    0.22
   1   4 -11    2.14    0.19
  -1  -4  11    2.52    0.20
   1  -4 -11    2.32    0.20
   1  -4 -11    1.80    0.18
   1   4 -10    6.66    0.36
   1   4 -10    6.48    0.32
  -1   4  10    5.95    0.28
  -1  -4  10    6.12    0.30
  -1   4   9    6.61    0.28
  -1  -4   9    6.45    0.29
  -1   4   8    4.37    0.20
  -1  -4   8    4.39    0.22
  -1   4   7   37.91    1.17
   1  -4  -7   36.42    1.28
  -1  -4   7   36.90    1.18
  -1   4   6   14.48    0.54
  -1   4   6   15.23    0.49
  -1  -4   6   15.18    0.50
  -1  -4   6   14.02    0.54
   1  -4  -6   14.55    0.53
  -1   4   5   55.56    1.83
  -1   4   5   59.32    1.76
   1  -4  -5   57.76    1.94
  -1  -4   5   57.25    1.83
  -1  -4   5   57.27    1.77
  -1   4   4   57.43    1.72
   1   4  -4   57.29    1.78
  -1   4   4   55.32    1.78
   1  -4  -4   57.20    1.78
  -1  -4   4   51.40    1.78
  -1  -4   4   55.76    1.73
   1  -4  -4   58.94    1.89
  -1  -4   4   56.68    1.78
  -1   4   3  248.53    7.76
   1   4  -3  250.79    7.75
  -1   4   3  251.08    7.60
  -1  -4   3  258.74    7.75
  -1  -4   3  239.06    7.75
   1  -4  -3  260.81    8.34
   1  -4  -3  254.36    7.75
   1   4  -2    0.53    0.07
  -1   4   2    0.50    0.07
   1   4  -2    0.46    0.06
  -1   4   2    0.61    0.06
   1  -4  -2    0.53    0.06
  -1  -4   2    0.53    0.06
  -1  -4   2    0.60    0.07
   1  -4  -2    0.53    0.07
   1   4  -1    0.34    0.05
   1   4  -1    0.32    0.07
   1   4  -1    0.40    0.10
  -1   4   1    0.27    0.07
  -1   4   1    0.32    0.05
   1   4  -1    0.38    0.05
  -1  -4   1    0.31    0.06
   1  -4  -1    0.28    0.07
  -1  -4   1    0.26    0.05
   1   4   0    1.62    0.11
   1   4   0    1.87    0.11
   1   4   0    2.12    0.18
  -1   4   0    1.89    0.13
  -1   4   0    2.12    0.13
  -1  -4   0    1.78    0.12
  -1  -4   0    2.00    0.12
   1  -4   0    1.73    0.12
  -1  -4   0    2.14    0.17
   1  -4   0    1.81    0.11
   1   4   1   47.26    1.50
  -1   4  -1   51.28    1.51
   1   4   1   46.46    1.51
  -1   4  -1   45.17    1.51
  -1  -4  -1   48.45    1.51
   1  -4   1   47.45    1.52
  -1  -4  -1   49.94    1.51
   1  -4   1   47.33    1.50
   1   4   2   52.59    1.57
   1   4   2   51.92    1.62
   1   4   2   49.17    1.62
  -1   4  -2   53.57    1.62
  -1   4  -2   48.05    1.62
   1  -4   2   52.00    1.57
   1  -4   2   52.97    1.63
  -1  -4  -2   53.40    1.62
   1  -4   2   49.11    1.62
  -1  -4  -2   52.53    1.62
  -1   4  -3   64.80    2.15
   1   4   3   69.30    2.09
   1   4   3   69.12    2.15
  -1   4  -3   69.17    2.15
   1  -4   3   68.26    2.09
  -1  -4  -3   71.67    2.15
  -1  -4  -3   67.15    2.28
   1  -4   3   68.92    2.15
  -1   4  -4    0.49    0.08
   1   4   4    0.38    0.07
   1   4   4    0.34    0.06
   1   4   4    0.31    0.05
   1  -4   4    0.27    0.07
   1  -4   4    0.39    0.06
  -1  -4  -4    0.37    0.05
  -1  -4  -4    0.32    0.06
   1   4   5   85.30    2.75
  -1   4  -5   85.19    2.66
   1   4   5   80.80    2.65
   1   4   5   86.05    2.58
  -1  -4  -5   83.99    2.66
   1  -4   5   84.30    2.66
   1  -4   5   84.75    2.58
  -1  -4  -5   84.55    2.81
   1   4   6   55.81    1.71
   1   4   6   54.44    1.82
   1  -4   6   55.49    1.72
   1   4   7   68.27    2.28
   1   4   7   70.34    2.14
   1  -4   7   69.05    2.15
   1   4   8    6.16    0.26
   1  -4   8    5.81    0.27
   1   4   9    0.29    0.09
   1  -4   9    0.20    0.09
  -1   4 -10    4.37    0.27
   1   4  10    4.26    0.24
  -1   4 -10    4.16    0.25
   1  -4  10    4.03    0.25
  -1  -4 -10    3.94    0.23
  -1   4 -11    9.97    0.41
  -1   4 -11    9.77    0.42
   1   4  11    9.90    0.42
  -1   4 -11   10.19    0.46
  -1  -4 -11   10.09    0.43
   1  -4  11   10.55    0.44
  -1   4 -12    4.51    0.32
  -1   4 -12    4.20    0.24
  -1   4 -12    4.29    0.28
  -1  -4 -12    3.85    0.26
  -1   4 -13    2.47    0.21
  -1   4 -13    3.06    0.26
  -1   4 -13    3.03    0.27
  -1  -4 -13    2.56    0.23
  -1   4 -14    0.29    0.10
  -1   4 -14    0.26    0.12
  -1  -4 -14    0.25    0.11
  -1   4 -15    0.45    0.09
  -1   4 -15    0.37    0.11
  -1  -4 -15    0.33    0.10
  -1  -4 -16    1.44    0.13
   1  -5 -16    4.60    0.21
   1   5 -15    6.93    0.30
   1  -5 -15    7.15    0.32
   1   5 -14    0.12    0.11
   1   5 -14    0.12    0.09
   1  -5 -14   -0.11    0.11
   1   5 -13    0.25    0.13
   1   5 -13    0.11    0.10
   1  -5 -13    0.29    0.12
   1   5 -12    0.65    0.16
   1   5 -12    0.50    0.11
   1   5 -12    0.53    0.15
   1  -5 -12    0.50    0.13
   1  -5 -12    0.44    0.12
   1   5 -11    0.36    0.15
   1   5 -11    0.27    0.10
   1   5 -11    0.35    0.12
   1  -5 -11    0.31    0.12
   1  -5 -11    0.21    0.11
  -1  -5  11    0.16    0.10
   1   5 -10    4.78    0.30
   1   5 -10    4.60    0.27
   1   5 -10    4.65    0.25
   1  -5 -10    4.29    0.26
   1  -5 -10    4.64    0.27
  -1  -5  10    4.77    0.26
  -1   5   9    0.40    0.09
  -1  -5   9    0.34    0.10
  -1   5   8    0.74    0.09
  -1  -5   8    0.59    0.10
  -1   5   7   12.09    0.42
   1  -5  -7   11.79    0.46
  -1  -5   7   12.41    0.44
  -1   5   6   23.31    0.82
  -1   5   6   23.31    0.83
  -1   5   6   24.61    0.77
  -1  -5   6   24.77    0.79
  -1  -5   6   23.37    0.83
   1  -5  -6   24.64    0.84
  -1   5   5  117.99    3.55
  -1   5   5  113.95    3.79
  -1   5   5  114.95    3.66
   1  -5  -5  120.89    3.90
  -1  -5   5  118.22    3.57
  -1  -5   5  115.81    3.66
   1   5  -4   18.19    0.61
  -1   5   4   18.16    0.63
  -1   5   4   18.17    0.56
  -1   5   4   17.79    0.62
  -1  -5   4   16.52    0.61
   1  -5  -4   17.93    0.63
  -1  -5   4   18.33    0.62
   1  -5  -4   17.50    0.61
   1   5  -3   16.15    0.55
  -1   5   3   15.33    0.54
  -1   5   3   16.30    0.50
  -1   5   3   15.45    0.55
   1  -5  -3   15.79    0.56
  -1  -5   3   16.94    0.55
  -1  -5   3   15.58    0.55
   1  -5  -3   15.81    0.54
   1   5  -2   10.10    0.36
  -1   5   2    9.65    0.36
  -1   5   2    9.52    0.35
   1  -5  -2    9.61    0.35
  -1  -5   2   10.13    0.35
  -1  -5   2    9.41    0.35
  -1   5   1    0.50    0.09
   1   5  -1    0.47    0.06
   1   5  -1    0.40    0.08
   1   5  -1    0.52    0.06
  -1   5   1    0.59    0.07
   1   5  -1    0.61    0.12
  -1  -5   1    0.58    0.08
  -1  -5   1    0.41    0.07
   1  -5  -1    0.68    0.08
   1  -5  -1    0.44    0.08
   1   5   0    0.92    0.09
  -1   5   0    1.20    0.11
   1   5   0    1.10    0.08
   1   5   0    1.01    0.09
  -1   5   0    1.08    0.11
   1  -5   0    0.95    0.09
   1  -5   0    0.91    0.09
  -1  -5   0    1.05    0.14
  -1  -5   0    1.07    0.10
  -1  -5   0    0.96    0.10
   1   5   1    1.31    0.09
   1   5   1    1.57    0.12
  -1   5  -1    1.43    0.13
  -1   5  -1    1.26    0.12
  -1   5  -1    1.34    0.12
   1   5   1    1.28    0.10
   1  -5   1    1.37    0.09
  -1  -5  -1    1.43    0.11
  -1  -5  -1    1.94    0.13
   1  -5   1    1.40    0.11
   1  -5   1    1.72    0.13
  -1  -5  -1    1.44    0.16
  -1   5  -2   22.09    0.75
   1   5   2   22.62    0.70
   1   5   2   22.31    0.74
  -1   5  -2   23.92    0.74
   1  -5   2   20.71    0.73
   1  -5   2   22.57    0.75
  -1  -5  -2   22.85    0.74
   1  -5   2   22.47    0.70
   1   5   3  151.79    4.47
  -1   5  -3  149.04    4.57
   1   5   3  144.69    4.57
  -1  -5  -3  147.49    4.58
  -1  -5  -3  147.57    4.58
   1  -5   3  146.36    4.48
   1  -5   3  147.00    4.58
   1   5   4   37.39    1.14
   1   5   4   36.60    1.22
   1   5   4   35.87    1.19
  -1   5  -4   36.64    1.19
   1  -5   4   37.39    1.15
  -1  -5  -4   36.83    1.20
  -1  -5  -4   36.91    1.25
   1  -5   4   37.06    1.20
   1   5   5   87.55    2.62
  -1   5  -5   85.21    2.70
   1   5   5   85.82    2.80
   1  -5   5   87.14    2.63
   1  -5   5   84.50    2.71
  -1  -5  -5   85.34    2.86
  -1  -5  -5   84.16    2.70
   1   5   6    8.84    0.35
   1   5   6    9.53    0.33
   1  -5   6    9.24    0.34
   1   5   7   14.11    0.52
   1   5   7   14.60    0.49
   1  -5   7   13.98    0.50
   1   5   8    1.77    0.14
   1  -5   8    1.89    0.16
   1   5   9    0.34    0.09
   1  -5   9    0.29    0.10
  -1   5 -10   19.12    0.73
  -1   5 -10   20.44    0.76
   1   5  10   20.31    0.71
  -1   5 -10   20.61    0.71
  -1  -5 -10   19.62    0.74
   1  -5  10   20.73    0.73
  -1   5 -11    0.76    0.11
  -1   5 -11    0.68    0.13
  -1   5 -11    0.65    0.16
   1   5  11    0.63    0.12
  -1  -5 -11    0.72    0.13
   1  -5  11    0.50    0.13
  -1   5 -12    0.42    0.15
  -1   5 -12    0.58    0.14
  -1   5 -12    0.59    0.11
  -1  -5 -12    0.47    0.13
  -1   5 -13    0.66    0.15
  -1   5 -13    0.50    0.11
  -1   5 -13    0.51    0.15
  -1  -5 -13    0.68    0.14
  -1   5 -14    8.20    0.35
  -1   5 -14    8.61    0.39
  -1   5 -14    8.47    0.38
  -1  -5 -14    8.60    0.38
  -1   5 -15    0.18    0.10
  -1   5 -15    0.30    0.08
  -1  -5 -15    0.27    0.10
   1   6 -15    0.04    0.08
   1  -6 -15    0.14    0.09
   1   6 -14    1.98    0.17
   1   6 -14    1.70    0.17
   1  -6 -14    1.85    0.18
   1   6 -13    4.55    0.26
   1   6 -13    4.66    0.29
   1   6 -13    4.65    0.29
   1  -6 -13    4.34    0.28
   1   6 -12   21.03    0.81
   1   6 -12   20.37    0.77
   1   6 -12   20.79    0.77
   1  -6 -12   21.12    0.88
   1  -6 -12   21.43    0.79
   1   6 -11    7.63    0.38
   1   6 -11    8.31    0.36
   1   6 -11    7.85    0.41
  -1  -6  11    8.01    0.38
   1  -6 -11    7.90    0.38
   1  -6 -11    8.08    0.41
   1   6 -10    1.07    0.17
   1   6 -10    0.92    0.14
   1   6 -10    0.58    0.10
  -1  -6  10    0.81    0.13
   1  -6 -10    0.75    0.13
   1  -6 -10    0.75    0.13
  -1  -6   9    2.11    0.18
  -1  -6   8   71.32    2.24
  -1   6   7    4.26    0.19
   1  -6  -7    4.22    0.21
  -1  -6   7    4.45    0.22
  -1   6   6   11.53    0.44
  -1   6   6   11.51    0.40
   1  -6  -6   12.27    0.45
  -1  -6   6   11.65    0.47
  -1  -6   6   12.44    0.43
  -1   6   5    3.85    0.15
  -1   6   5    3.65    0.18
  -1   6   5    3.68    0.20
   1  -6  -5    3.65    0.18
  -1  -6   5    3.34    0.20
  -1  -6   5    3.59    0.18
  -1   6   4  170.79    5.67
   1   6  -4  182.07    5.46
  -1   6   4  177.12    5.44
  -1   6   4  171.98    5.29
   1  -6  -4  180.14    5.82
  -1  -6   4  168.24    5.44
  -1  -6   4  179.71    5.43
   1  -6  -4  170.38    5.42
   1   6  -3    0.94    0.10
  -1   6   3    0.72    0.08
  -1   6   3    0.78    0.06
  -1   6   3    0.82    0.10
  -1   6   3    0.69    0.08
  -1  -6   3    0.92    0.10
  -1  -6   3    0.81    0.09
   1  -6  -3    0.93    0.09
   1  -6  -3    0.79    0.09
  -1   6   2   36.96    1.22
   1   6  -2   38.26    1.22
  -1   6   2   35.50    1.21
   1   6  -2   38.94    1.58
  -1  -6   2   38.06    1.21
   1  -6  -2   37.54    1.21
   1   6  -1   31.77    1.03
  -1   6   1   31.13    1.04
   1   6  -1   31.06    0.98
  -1   6   1   30.03    1.03
   1   6  -1   31.50    1.33
  -1  -6   1   31.92    1.03
   1  -6  -1   31.48    1.29
   1  -6  -1   31.60    1.03
  -1   6   0   14.54    0.52
   1   6   0   13.96    0.51
  -1   6   0   14.41    0.52
   1   6   0   14.84    0.47
  -1  -6   0   14.84    0.67
   1  -6   0   14.77    0.52
   1  -6   0   13.92    0.52
  -1  -6   0   14.23    0.52
  -1  -6   0   15.57    0.52
   1  -6   0   14.22    0.51
  -1   6  -1    2.20    0.17
  -1   6  -1    2.11    0.16
  -1   6  -1    2.25    0.16
   1   6   1    2.18    0.12
   1   6   1    2.35    0.15
   1  -6   1    2.10    0.16
   1  -6   1    2.08    0.15
  -1  -6  -1    2.32    0.15
   1  -6   1    2.08    0.12
  -1  -6  -1    2.25    0.16
  -1  -6  -1    1.93    0.20
   1   6   2  104.55    3.12
   1   6   2  102.31    3.21
  -1   6  -2   94.67    3.21
  -1   6  -2  107.43    3.21
  -1  -6  -2  103.53    3.21
   1  -6   2  104.54    3.22
   1   6   3   19.58    0.69
  -1   6  -3   20.10    0.68
   1   6   3   19.49    0.63
   1   6   3   19.26    0.67
   1  -6   3   20.16    0.64
   1  -6   3   20.49    0.69
  -1  -6  -3   20.00    0.68
  -1  -6  -3   20.23    0.70
   1   6   4    7.48    0.27
   1   6   4    7.56    0.31
  -1   6  -4    7.86    0.32
   1   6   4    7.81    0.30
  -1  -6  -4    7.67    0.29
   1  -6   4    7.51    0.32
   1  -6   4    7.77    0.29
  -1  -6  -4    7.62    0.32
   1   6   5   11.56    0.44
   1   6   5   11.45    0.40
  -1  -6  -5   12.27    0.44
  -1  -6  -5   12.04    0.46
   1  -6   5   12.26    0.42
   1   6   6  187.03    5.65
   1   6   6  185.04    6.03
   1  -6   6  186.15    5.67
   1   6   7    0.47    0.08
   1   6   7    0.52    0.08
   1  -6   7    0.70    0.10
   1   6   8    6.71    0.28
   1  -6   8    6.34    0.30
   1   6   9    0.30    0.09
   1  -6   9    0.18    0.10
   1   6  10    0.28    0.10
  -1   6 -10    0.25    0.12
  -1   6 -10    0.26    0.11
  -1   6 -10    0.22    0.08
   1  -6  10    0.05    0.09
  -1  -6 -10    0.06    0.10
  -1   6 -11    1.67    0.17
  -1   6 -11    1.67    0.15
  -1   6 -11    1.70    0.20
   1  -6  11    1.21    0.17
  -1  -6 -11    1.77    0.17
  -1   6 -12    6.08    0.34
  -1   6 -12    6.74    0.31
  -1   6 -12    6.46    0.37
  -1  -6 -12    6.97    0.35
  -1   6 -13    0.22    0.14
  -1   6 -13    0.04    0.09
  -1   6 -13    0.06    0.13
  -1  -6 -13    0.10    0.11
  -1   6 -14    3.72    0.21
  -1   6 -14    3.21    0.24
  -1   6 -14    3.02    0.24
  -1  -6 -14    4.23    0.25
  -1   6 -15    0.54    0.10
  -1   6 -15    0.49    0.09
  -1  -6 -15    0.56    0.11
   1   7 -15    0.57    0.09
   1   7 -15    0.68    0.09
   1  -7 -15    0.76    0.11
   1   7 -14    0.15    0.11
   1   7 -14    0.14    0.09
   1   7 -14    0.12    0.11
   1  -7 -14    0.06    0.11
   1   7 -13    0.29    0.10
   1   7 -13    0.31    0.13
   1   7 -13    0.29    0.13
   1  -7 -13    0.27    0.11
   1  -7 -13    0.28    0.12
   1   7 -12    7.11    0.34
   1   7 -12    7.71    0.38
   1   7 -12    7.58    0.37
   1  -7 -12    6.83    0.37
   1  -7 -12    7.04    0.38
   1   7 -11    0.09    0.13
   1   7 -11    0.16    0.12
   1   7 -11    0.28    0.10
  -1  -7  11    0.29    0.11
   1  -7 -11    0.46    0.13
   1  -7 -11    0.04    0.10
   1   7 -10    2.44    0.20
   1   7 -10    2.44    0.22
   1   7 -10    2.14    0.18
  -1  -7  10    2.44    0.21
   1  -7 -10    2.17    0.21
   1  -7 -10    1.93    0.18
   1   7  -9    1.62    0.17
  -1  -7   9    1.77    0.18
  -1  -7   8    2.26    0.18
  -1   7   7   20.99    0.76
  -1  -7   7   22.04    0.74
   1  -7  -7   21.66    0.78
  -1   7   6   43.14    1.46
   1  -7  -6   43.48    1.50
  -1  -7   6   44.42    1.39
  -1   7   5   64.03    2.13
  -1   7   5   65.28    2.03
  -1   7   5   65.88    2.18
   1  -7  -5   68.58    2.24
  -1  -7   5   66.49    2.05
  -1   7   4   14.11    0.53
  -1   7   4   14.40    0.47
  -1   7   4   14.78    0.55
  -1  -7   4   14.70    0.54
   1  -7  -4   15.31    0.54
  -1   7   3    0.28    0.08
   1   7  -3    0.24    0.07
   1   7  -3    0.27    0.12
  -1   7   3    0.25    0.07
  -1   7   3    0.22    0.04
  -1  -7   3    0.25    0.08
  -1  -7   3    0.22    0.08
   1  -7  -3    0.16    0.06
   1   7  -2   75.50    2.38
  -1   7   2   73.13    2.38
  -1   7   2   77.29    2.46
   1   7  -2   78.99    3.07
  -1  -7   2   69.57    2.37
  -1   7   1   27.15    0.92
  -1   7   1   28.67    0.92
   1   7  -1   27.40    0.91
   1   7  -1   27.30    1.18
   1   7  -1   27.53    0.85
  -1   7   1   25.94    0.91
   1  -7  -1   26.17    1.13
  -1  -7   1   25.93    0.91
   1  -7  -1   26.90    0.93
   1  -7  -1   26.02    0.91
  -1  -7   1   27.38    0.91
  -1   7   0   23.78    0.85
  -1   7   0   25.51    0.85
   1   7   0   24.69    0.79
   1   7   0   24.80    0.84
  -1  -7   0   24.95    1.09
   1  -7   0   24.76    0.86
  -1  -7   0   25.06    0.85
   1  -7   0   25.19    0.85
  -1  -7   0   24.82    0.84
   1   7   1    1.08    0.11
  -1   7  -1    1.14    0.12
  -1   7  -1    1.23    0.12
  -1   7  -1    1.30    0.15
   1   7   1    1.28    0.09
   1   7   1    1.06    0.11
  -1  -7  -1    1.25    0.16
  -1  -7  -1    1.01    0.11
   1  -7   1    1.21    0.12
   1  -7   1    1.19    0.09
  -1  -7  -1    1.35    0.13
   1   7   2    0.62    0.08
  -1   7  -2    0.83    0.10
   1   7   2    0.70    0.07
  -1   7  -2    0.63    0.11
   1  -7   2    0.53    0.09
  -1  -7  -2    0.58    0.09
  -1   7  -3  136.65    4.21
   1   7   3  134.00    4.21
   1   7   3  137.15    4.10
   1   7   3  136.35    4.39
   1  -7   3  128.86    4.11
   1  -7   3  138.91    4.23
  -1  -7  -3  134.04    4.22
   1   7   4   90.55    2.71
  -1   7  -4   88.84    2.80
   1   7   4   88.27    2.90
  -1  -7  -4   88.92    2.80
   1  -7   4   87.45    2.72
   1  -7   4   89.06    2.81
  -1  -7  -4   87.08    2.97
   1   7   5  119.38    3.61
   1   7   5  120.37    3.86
   1  -7   5  116.82    3.63
  -1  -7  -5  116.75    3.95
   1   7   6    2.02    0.15
   1   7   6    2.10    0.13
   1  -7   6    2.19    0.16
   1   7   7    2.15    0.14
   1   7   7    2.12    0.16
   1  -7   7    1.94    0.17
   1   7   8   18.28    0.67
   1   7   8   17.98    0.62
   1  -7   8   18.05    0.65
   1   7   9    2.57    0.18
  -1   7  -9    2.01    0.21
  -1   7  -9    2.11    0.17
   1  -7   9    1.88    0.18
  -1   7 -10    3.07    0.24
  -1   7 -10    3.17    0.25
  -1  -7 -10    3.31    0.23
  -1  -7 -10    3.06    0.23
   1  -7  10    3.00    0.24
  -1   7 -11    0.08    0.12
  -1   7 -11    0.04    0.08
  -1   7 -11    0.04    0.13
   1  -7  11    0.17    0.11
  -1  -7 -11    0.12    0.10
  -1   7 -12    1.69    0.20
  -1   7 -12    1.63    0.15
  -1   7 -12    1.74    0.18
  -1  -7 -12    1.62    0.18
  -1   7 -13    6.97    0.37
  -1   7 -13    7.65    0.33
  -1   7 -13    6.95    0.36
  -1  -7 -13    7.57    0.36
  -1   7 -14    3.21    0.19
  -1   7 -14    3.02    0.23
  -1   7 -14    3.27    0.23
  -1  -7 -14    3.29    0.23
  -1   7 -15    3.09    0.18
  -1  -7 -15    2.98    0.19
   1   8 -15    4.51    0.21
   1   8 -15    4.11    0.20
   1  -8 -15    4.43    0.21
   1   8 -14    2.27    0.17
   1   8 -14    2.66    0.20
   1   8 -14    2.75    0.20
   1  -8 -14    2.20    0.20
   1   8 -13    6.82    0.36
   1   8 -13    8.14    0.34
   1   8 -13    7.28    0.35
   1  -8 -13    7.47    0.39
   1  -8 -13    7.76    0.36
   1   8 -12    7.11    0.37
   1   8 -12    7.51    0.35
   1   8 -12    7.59    0.39
   1  -8 -12    7.41    0.37
   1  -8 -12    7.64    0.40
   1   8 -11    0.41    0.13
   1   8 -11    0.26    0.13
   1   8 -11    0.33    0.10
   1  -8 -11    0.22    0.11
   1  -8 -11    0.44    0.13
   1   8 -10    0.32    0.14
   1   8 -10    0.33    0.10
   1   8 -10    0.12    0.12
   1  -8 -10    0.36    0.12
  -1  -8  10    0.33    0.12
   1  -8 -10    0.24    0.11
   1   8  -9    2.23    0.19
   1   8  -9    2.32    0.22
  -1  -8   9    2.01    0.19
   1  -8  -9    1.82    0.19
  -1  -8   8    0.41    0.10
  -1   8   7   34.45    1.18
  -1  -8   7   33.89    1.12
   1  -8  -7   34.23    1.20
  -1   8   6    2.55    0.17
   1   8  -6    2.81    0.19
  -1  -8   6    2.55    0.18
   1  -8  -6    2.81    0.17
  -1   8   5   26.45    0.95
   1  -8  -5   28.00    0.97
  -1  -8   5   27.90    0.96
  -1  -8   5   27.79    0.90
   1   8  -4    8.66    0.49
  -1   8   4    8.84    0.38
  -1   8   4    8.13    0.35
  -1  -8   4    8.61    0.37
   1  -8  -4    9.09    0.36
  -1   8   3  124.97    4.04
  -1   8   3  130.94    4.20
   1   8  -3  131.89    5.20
  -1  -8   3  130.86    4.04
   1  -8  -3  125.74    4.03
   1   8  -2   47.31    1.90
  -1   8   2   43.30    1.47
  -1   8   2   45.97    1.50
   1   8  -2   44.27    1.46
  -1  -8   2   45.50    1.47
   1  -8  -2   42.57    1.84
  -1   8   1   19.72    0.68
   1   8  -1   18.89    0.86
  -1   8   1   18.75    0.66
   1   8  -1   19.39    0.61
   1   8  -1   19.14    0.66
  -1  -8   1   18.24    0.67
   1  -8  -1   18.38    0.81
   1  -8  -1   18.51    0.67
  -1  -8   1   19.45    0.68
   1  -8  -1   18.14    0.67
  -1   8   0   17.52    0.62
   1   8   0   17.26    0.62
   1   8   0   17.30    0.62
   1   8   0   17.33    0.57
  -1   8   0   17.82    0.63
  -1  -8   0   18.11    0.63
   1  -8   0   18.14    0.63
   1  -8   0   17.48    0.62
  -1  -8   0   17.09    0.63
   1   8   1   26.73    0.89
  -1   8  -1   24.63    0.90
  -1   8  -1   26.79    1.11
   1   8   1   24.82    0.90
  -1   8  -1   26.27    0.90
   1   8   1   27.19    0.83
   1  -8   1   27.61    0.90
  -1  -8  -1   25.57    0.89
   1  -8   1   26.15    0.90
  -1  -8  -1   26.14    0.90
  -1   8  -2    7.13    0.37
   1   8   2    6.88    0.30
  -1   8  -2    7.34    0.32
  -1   8  -2    6.33    0.28
   1   8   2    6.95    0.25
   1  -8   2    7.08    0.32
   1   8   3   80.27    2.64
  -1   8  -3   76.28    2.62
   1   8   3   82.66    2.46
  -1   8  -3   82.26    2.55
   1  -8   3   83.44    2.57
   1  -8   3   76.83    2.46
  -1  -8  -3   79.87    2.55
   1   8   4    1.84    0.12
   1   8   4    2.17    0.15
  -1  -8  -4    2.04    0.16
   1  -8   4    1.86    0.13
   1   8   5   66.86    2.17
   1   8   5   65.61    2.01
   1  -8   5   63.03    2.04
  -1  -8  -5   65.60    2.21
   1   8   6   18.63    0.63
   1   8   6   19.17    0.69
   1  -8   6   18.62    0.65
   1   8   7   14.07    0.54
   1   8   7   14.20    0.50
   1  -8   7   13.96    0.53
   1   8   8   35.85    1.26
   1   8   8   37.57    1.19
   1  -8   8   36.56    1.22
  -1   8  -9   16.85    0.65
  -1   8  -9   16.34    0.60
   1  -8   9   16.24    0.63
  -1  -8  -9   16.73    0.73
  -1   8 -10   16.62    0.61
  -1   8 -10   17.54    0.66
  -1  -8 -10   15.85    0.63
   1  -8  10   15.19    0.63
  -1  -8 -10   15.67    0.70
  -1   8 -11    2.90    0.25
  -1   8 -11    2.61    0.24
  -1  -8 -11    2.64    0.24
  -1  -8 -11    3.11    0.24
  -1   8 -12    1.45    0.19
  -1   8 -12    1.56    0.18
  -1  -8 -12    1.63    0.18
  -1   8 -13    4.23    0.27
  -1   8 -13    3.98    0.27
  -1  -8 -13    4.11    0.27
  -1   8 -14    1.60    0.16
  -1   8 -14    1.46    0.15
  -1  -8 -14    1.77    0.16
  -1   8 -15    0.07    0.08
  -1  -8 -15    0.24    0.08
   1  -9 -15    0.02    0.07
   1   9 -14    3.47    0.22
   1   9 -14    3.47    0.22
   1   9 -14    4.07    0.21
   1  -9 -14    4.41    0.23
   1   9 -13    0.08    0.09
   1   9 -13   -0.04    0.10
   1   9 -13    0.09    0.11
   1  -9 -13    0.05    0.11
   1  -9 -13    0.12    0.11
   1   9 -12    4.85    0.26
   1   9 -12    5.46    0.30
   1   9 -12    4.88    0.30
   1  -9 -12    4.84    0.29
   1  -9 -12    4.55    0.32
   1   9 -11    0.68    0.15
   1   9 -11    0.54    0.11
   1   9 -11    0.66    0.14
   1  -9 -11    0.42    0.13
   1  -9 -11    0.64    0.13
   1   9 -10    2.84    0.24
   1   9 -10    2.38    0.20
   1   9 -10    2.80    0.25
   1  -9 -10    2.42    0.24
   1  -9 -10    2.42    0.22
  -1  -9  10    2.60    0.23
   1   9  -9    7.64    0.36
   1   9  -9    7.48    0.38
   1  -9  -9    6.96    0.39
  -1  -9   9    7.82    0.37
  -1  -9   8   10.06    0.42
  -1   9   7    8.85    0.38
   1  -9  -7    8.79    0.38
  -1  -9   7    8.71    0.37
   1   9  -6  140.60    4.58
  -1   9   6  136.15    4.54
   1  -9  -6  140.32    4.66
  -1  -9   6  137.91    4.26
   1   9  -5    2.42    0.26
  -1   9   5    1.83    0.16
   1   9  -5    2.07    0.16
  -1  -9   5    1.85    0.15
   1  -9  -5    1.94    0.15
   1   9  -4   26.42    1.20
  -1   9   4   25.71    0.91
  -1  -9   4   25.81    0.92
   1  -9  -4   26.40    0.93
   1   9  -3    6.93    0.42
  -1   9   3    5.86    0.31
  -1   9   3    6.71    0.29
  -1  -9   3    7.02    0.32
  -1   9   2   40.34    1.36
   1   9  -2   39.84    1.75
  -1   9   2   41.47    1.38
   1   9  -2   41.91    1.37
  -1  -9   2   41.25    1.37
  -1   9   1    3.59    0.18
  -1   9   1    3.29    0.21
   1   9  -1    3.48    0.18
   1   9  -1    3.53    0.27
   1  -9  -1    3.01    0.16
  -1  -9   1    3.49    0.21
   1  -9  -1    3.09    0.20
  -1   9   0    4.72    0.25
  -1   9   0    4.63    0.22
   1   9   0    4.85    0.22
   1   9   0    4.81    0.19
   1   9   0    4.68    0.23
   1  -9   0    4.60    0.20
   1  -9   0    4.82    0.24
  -1  -9   0    4.67    0.25
   1   9   1   29.73    1.05
  -1   9  -1   31.26    1.06
  -1   9  -1   31.54    1.06
   1   9   1   31.95    0.99
   1   9   1   31.50    1.07
  -1  -9  -1   31.84    1.06
   1  -9   1   31.60    1.06
   1  -9   1   30.67    1.07
  -1   9  -2   35.64    1.19
   1   9   2   34.00    1.20
   1   9   2   35.93    1.11
  -1   9  -2   33.86    1.19
  -1   9  -2   36.57    1.50
   1  -9   2   35.88    1.20
   1   9   3    0.11    0.05
  -1   9  -3    0.16    0.07
  -1   9  -3    0.22    0.09
  -1   9  -3    0.07    0.09
   1   9   3    0.26    0.08
   1  -9   3    0.16    0.06
  -1  -9  -3    0.25    0.08
   1   9   4  105.21    3.37
   1   9   4  102.98    3.13
   1  -9   4   98.99    3.15
   1   9   5    1.41    0.14
   1   9   5    1.34    0.11
  -1  -9  -5    1.25    0.12
   1  -9   5    1.06    0.12
   1   9   6    1.44    0.12
   1   9   6    1.07    0.12
   1  -9   6    1.07    0.12
   1   9   7   15.24    0.57
   1  -9   7   13.99    0.55
   1   9   8   10.91    0.44
   1  -9   8    9.89    0.44
  -1   9  -9    0.15    0.12
  -1   9  -9    0.21    0.11
  -1  -9  -9    0.15    0.11
   1  -9   9    0.07    0.10
  -1  -9  -9    0.08    0.10
  -1   9 -10    2.53    0.23
  -1   9 -10    2.37    0.20
   1  -9  10    2.37    0.22
  -1  -9 -10    2.21    0.20
  -1  -9 -10    2.30    0.23
  -1   9 -11    1.32    0.17
  -1   9 -11    1.55    0.19
  -1  -9 -11    1.12    0.16
  -1  -9 -11    1.05    0.15
  -1   9 -12    0.51    0.14
  -1   9 -12    0.61    0.15
  -1  -9 -12    0.75    0.14
  -1  -9 -12    0.56    0.13
  -1   9 -13    0.76    0.14
  -1   9 -13    0.80    0.15
  -1  -9 -13    1.06    0.14
  -1   9 -14    5.55    0.28
  -1   9 -14    5.88    0.27
  -1  -9 -14    5.94    0.28
  -1   9 -15    0.47    0.08
  -1  -9 -15    0.45    0.08
   1  10 -14    0.31    0.09
   1  10 -14    0.38    0.10
   1 -10 -14    0.41    0.09
   1  10 -13    0.98    0.15
   1  10 -13    0.98    0.14
   1 -10 -13    1.61    0.15
   1 -10 -13    1.29    0.16
   1  10 -12    1.88    0.19
   1  10 -12    2.12    0.20
   1  10 -12    2.53    0.19
   1 -10 -12    2.41    0.25
   1 -10 -12    2.50    0.21
   1  10 -11    1.80    0.20
   1  10 -11    2.07    0.18
   1  10 -11    1.57    0.19
   1 -10 -11    1.73    0.17
   1 -10 -11    2.12    0.21
   1  10 -10    9.13    0.43
   1  10 -10    9.27    0.41
  -1 -10  10    8.98    0.42
   1 -10 -10    9.42    0.48
   1 -10 -10    8.91    0.40
   1  10  -9    0.81    0.15
   1  10  -9    0.58    0.13
  -1 -10   9    0.51    0.13
   1 -10  -9    0.36    0.13
   1 -10  -9    0.35    0.11
   1  10  -8   10.56    0.43
  -1 -10   8   10.67    0.44
  -1  10   7    5.45    0.29
   1 -10  -7    5.71    0.29
  -1 -10   7    5.66    0.29
  -1  10   6   10.06    0.44
   1  10  -6   10.59    0.44
  -1 -10   6   11.04    0.42
   1 -10  -6   11.05    0.45
  -1  10   5   12.84    0.51
   1  10  -5   12.68    0.51
   1  10  -5   12.83    0.71
   1 -10  -5   12.90    0.52
  -1 -10   5   13.57    0.48
  -1  10   4   60.36    2.03
   1  10  -4   59.95    2.58
   1  10  -4   60.22    2.05
  -1 -10   4   61.96    2.01
   1 -10  -4   61.67    2.09
   1  10  -3   59.97    2.53
   1  10  -3   57.59    2.01
  -1  10   3   61.73    2.00
  -1 -10   3   60.64    1.97
  -1  10   2    1.00    0.11
   1  10  -2    1.07    0.18
  -1  10   2    0.99    0.14
   1  10  -2    1.11    0.11
  -1 -10   2    0.81    0.13
   1 -10  -2    0.89    0.10
  -1  10   1   19.14    0.71
  -1  10   1   19.66    0.69
   1  10  -1   20.75    0.70
   1 -10  -1   19.30    0.70
  -1 -10   1   19.73    0.72
   1  10   0    7.01    0.26
  -1  10   0    6.97    0.32
  -1  10   0    6.99    0.29
   1  10   0    7.16    0.30
   1 -10   0    6.77    0.27
   1 -10   0    6.96    0.32
  -1  10  -1   46.56    1.57
   1  10   1   49.21    1.60
  -1  10  -1   46.19    1.58
   1  10   1   47.96    1.48
  -1 -10  -1   47.29    1.56
  -1  10  -2   31.14    1.09
   1  10   2   32.62    1.02
  -1  10  -2   32.84    1.38
   1  10   3   39.59    1.22
   1  10   3   39.25    1.33
  -1  10  -3   40.50    1.66
  -1  10  -3   36.63    1.33
  -1  10  -3   37.10    1.30
   1 -10   3   40.71    1.23
  -1 -10  -3   36.97    1.31
   1  10   4    0.48    0.10
   1  10   4    0.27    0.06
   1 -10   4    0.39    0.08
   1  10   5   14.62    0.58
   1 -10   5   14.13    0.53
  -1 -10  -5   15.38    0.57
   1  10   6   52.22    1.75
  -1  10  -6   50.33    1.76
   1 -10   6   50.74    1.64
  -1  10  -7   13.60    0.55
   1  10   7   13.42    0.55
   1 -10   7   13.57    0.53
  -1  10  -8    2.21    0.18
  -1  10  -8    2.47    0.22
   1  10   8    2.45    0.21
   1 -10   8    2.06    0.19
  -1  10  -9    3.63    0.25
  -1  10  -9    3.51    0.27
  -1 -10  -9    3.45    0.23
   1 -10   9    3.27    0.25
  -1 -10  -9    3.48    0.26
  -1  10 -10    0.49    0.14
  -1  10 -10    0.40    0.15
   1 -10  10    0.34    0.13
  -1 -10 -10    0.25    0.13
  -1 -10 -10    0.40    0.11
  -1  10 -11    4.44    0.30
  -1  10 -11    3.91    0.30
   1  10  11    4.31    0.27
  -1 -10 -11    4.15    0.27
  -1 -10 -11    4.50    0.30
  -1  10 -12    0.71    0.15
  -1  10 -12    0.46    0.14
  -1 -10 -12    0.81    0.15
  -1 -10 -12    0.84    0.14
  -1  10 -13    0.05    0.11
  -1  10 -13    0.13    0.11
  -1 -10 -13    0.24    0.11
  -1  10 -14    2.11    0.18
  -1  10 -14    2.10    0.17
  -1 -10 -14    2.47    0.17
  -1 -10 -15    0.64    0.09
   1  11 -14    0.28    0.09
   1  11 -14    0.14    0.09
   1 -11 -14    0.30    0.08
   1 -11 -14    0.18    0.09
   1  11 -13    0.14    0.10
   1  11 -13    0.13    0.10
   1 -11 -13    0.14    0.11
   1 -11 -13    0.10    0.09
   1  11 -12    0.11    0.11
   1  11 -12    0.08    0.11
   1 -11 -12   -0.02    0.11
   1 -11 -12    0.09    0.10
   1  11 -11    7.56    0.39
   1  11 -11    7.72    0.38
   1 -11 -11    7.62    0.43
   1 -11 -11    8.27    0.36
   1  11 -10    2.15    0.21
   1  11 -10    2.30    0.22
   1 -11 -10    2.53    0.20
   1 -11 -10    2.12    0.23
  -1 -11  10    2.16    0.20
   1  11  -9    0.23    0.13
   1  11  -9    0.45    0.13
   1  11  -9    0.19    0.12
   1 -11  -9    0.40    0.12
   1 -11  -9    0.08    0.12
  -1 -11   9    0.47    0.12
  -1  11   8   10.93    0.48
   1  11  -8   11.37    0.46
   1  11  -8   12.32    0.52
   1  11  -8   11.35    0.49
   1 -11  -8   10.40    0.53
  -1 -11   8   11.25    0.47
  -1  11   7   34.02    1.22
   1  11  -7   34.06    1.22
  -1 -11   7   36.58    1.16
   1 -11  -7   33.88    1.25
  -1  11   6   30.72    1.10
   1  11  -6   29.99    1.09
   1 -11  -6   31.14    1.12
  -1 -11   6   31.71    1.03
   1  11  -5   88.79    3.05
  -1  11   5   92.08    3.04
   1 -11  -5   91.92    3.13
  -1 -11   5   94.13    2.85
  -1  11   4   15.49    0.58
   1  11  -4   15.10    0.58
   1  11  -4   15.33    0.80
   1 -11  -4   15.31    0.60
  -1  11   3    6.25    0.28
   1  11  -3    5.84    0.28
   1  11  -3    6.72    0.44
   1 -11  -3    5.93    0.27
  -1 -11   3    6.23    0.33
  -1  11   2    9.92    0.39
   1  11  -2    9.86    0.37
   1  11  -2    9.31    0.54
   1  11  -2    9.73    0.39
  -1 -11   2    9.54    0.43
   1  11  -1   18.70    0.64
  -1  11   1   17.70    0.64
   1  11  -1   17.40    0.65
  -1 -11   1   17.92    0.67
  -1  11   0   19.98    0.71
   1  11   0   19.37    0.73
   1  11   0   20.95    0.66
   1  11   0   20.80    0.72
  -1 -11   0   19.81    0.74
   1  11   1   27.02    0.91
   1  11   1   26.11    0.83
  -1  11  -1   25.19    0.91
  -1  11  -1   25.53    0.90
  -1 -11  -1   26.26    0.92
  -1  11  -2   42.63    1.45
   1  11   2   44.54    1.47
   1  11   2   41.27    1.48
   1  11   2   44.26    1.36
  -1  11  -2   43.73    1.48
  -1  11  -3   41.13    1.46
   1  11   3   45.26    1.49
  -1  11  -3   43.04    1.49
   1  11   3   40.99    1.49
   1 -11   3   46.76    1.38
  -1  11  -4   41.26    1.44
   1  11   4   42.44    1.44
   1  11   4   38.99    1.42
   1 -11   4   43.27    1.33
  -1  11  -5   57.43    2.03
   1  11   5   59.34    2.02
  -1 -11  -5   59.91    2.05
   1 -11   5   61.61    1.88
  -1  11  -6   12.26    0.51
   1  11   6   12.06    0.51
   1 -11   6   12.21    0.47
  -1  11  -7    9.64    0.42
   1  11   7    8.66    0.43
   1 -11   7    9.34    0.40
  -1  11  -8    0.13    0.13
  -1  11  -8    0.42    0.12
  -1  11  -8    0.24    0.11
   1  11   8    0.33    0.11
   1 -11   8    0.17    0.11
  -1 -11  -8    0.14    0.11
  -1  11  -9    0.24    0.12
  -1  11  -9    0.26    0.14
  -1 -11  -9    0.29    0.10
  -1 -11  -9    0.02    0.11
   1 -11   9    0.13    0.10
  -1  11 -10    2.57    0.23
  -1  11 -10    2.77    0.24
  -1 -11 -10    2.56    0.26
  -1 -11 -10    3.00    0.22
  -1  11 -11    2.09    0.19
  -1  11 -11    2.16    0.22
   1  11  11    1.93    0.19
  -1 -11 -11    1.88    0.20
  -1 -11 -11    1.88    0.17
  -1  11 -12    2.65    0.24
  -1  11 -12    2.68    0.24
  -1 -11 -12    3.01    0.25
  -1 -11 -12    3.14    0.22
  -1  11 -13    4.77    0.27
  -1  11 -13    4.81    0.27
  -1 -11 -13    5.48    0.26
  -1  11 -14    1.97    0.16
  -1  11 -14    2.00    0.16
  -1 -11 -14    2.11    0.15
   1  12 -14    5.84    0.26
   1  12 -14    5.77    0.25
   1 -12 -14    6.16    0.29
   1  12 -13    1.65    0.15
   1  12 -13    1.58    0.15
   1 -12 -13    1.60    0.17
   1 -12 -13    1.75    0.15
   1  12 -12    7.74    0.36
   1  12 -12    7.42    0.37
   1 -12 -12    8.09    0.43
   1 -12 -12    8.23    0.34
   1  12 -11    3.10    0.24
   1  12 -11    2.81    0.24
   1 -12 -11    2.81    0.28
   1 -12 -11    2.44    0.20
   1  12 -10    1.40    0.17
   1  12 -10    1.50    0.18
   1 -12 -10    1.32    0.19
   1 -12 -10    1.51    0.16
   1  12  -9    4.28    0.29
   1  12  -9    5.21    0.31
   1  12  -9    4.78    0.29
  -1 -12   9    4.37    0.27
   1 -12  -9    4.49    0.32
  -1  12   8   42.50    1.53
   1  12  -8   47.68    1.60
   1  12  -8   44.64    1.52
   1  12  -8   43.33    1.44
   1 -12  -8   40.61    1.74
  -1 -12   8   43.79    1.44
   1  12  -7    2.78    0.22
  -1  12   7    2.72    0.23
   1  12  -7    2.83    0.21
  -1 -12   7    2.62    0.20
   1  12  -6    3.67    0.23
  -1  12   6    3.62    0.24
  -1 -12   6    4.07    0.22
   1 -12  -6    3.67    0.25
  -1  12   5    0.36    0.10
   1  12  -5    0.32    0.09
  -1 -12   5    0.36    0.09
   1 -12  -5    0.38    0.10
   1  12  -4   77.41    2.64
  -1  12   4   81.96    2.63
   1 -12  -4   77.81    2.71
   1  12  -3    1.07    0.12
  -1  12   3    0.93    0.11
  -1  12   3    0.96    0.11
   1  12  -2   41.82    1.44
  -1  12   2   40.50    1.43
   1  12  -2   43.22    1.42
  -1  12   2   42.96    1.43
  -1  12   1   70.62    2.41
  -1  12   1   73.96    2.39
   1  12  -1   71.31    2.42
   1  12  -1   73.89    2.39
   1  12   0    1.38    0.12
   1  12   0    1.34    0.13
  -1  12   0    1.34    0.12
  -1  12   0    1.41    0.13
  -1  12  -1    3.63    0.19
   1  12   1    3.77    0.17
  -1  12  -1    3.42    0.20
   1  12   1    3.98    0.21
   1  12   1    3.47    0.20
   1  12   2   99.57    3.43
   1  12   2  107.83    3.40
  -1  12  -2  102.23    3.38
  -1  12  -2  103.46    3.43
   1  12   3    6.34    0.31
   1  12   3    6.04    0.30
  -1  12  -3    6.48    0.31
  -1  12  -3    6.48    0.28
   1 -12   3    6.84    0.27
   1  12   4    0.27    0.10
   1  12   4    0.48    0.10
  -1  12  -4    0.57    0.11
   1 -12   4    0.49    0.09
   1  12   5    5.59    0.30
  -1  12  -5    5.18    0.29
   1 -12   5    5.10    0.25
  -1 -12  -5    5.07    0.28
   1  12   6   49.99    1.73
  -1  12  -6   49.60    1.73
   1 -12   6   50.65    1.61
  -1  12  -7    3.72    0.25
   1  12   7    3.95    0.27
  -1  12  -7    3.80    0.26
  -1  12  -7    3.56    0.24
   1 -12   7    3.51    0.23
  -1  12  -8    3.58    0.26
  -1  12  -8    3.43    0.24
  -1  12  -8    2.99    0.24
   1  12   8    3.39    0.26
   1 -12   8    3.13    0.24
  -1 -12  -8    2.99    0.26
  -1 -12  -8    3.29    0.22
  -1  12  -9    5.89    0.34
  -1  12  -9    5.71    0.31
  -1 -12  -9    5.95    0.29
  -1 -12  -9    5.50    0.35
   1 -12   9    6.03    0.32
  -1  12 -10   -0.01    0.13
  -1  12 -10    0.04    0.12
  -1 -12 -10   -0.05    0.12
  -1 -12 -10    0.21    0.10
   1  12  11    0.76    0.14
  -1  12 -11    0.32    0.14
  -1  12 -11    0.47    0.14
  -1 -12 -11    0.72    0.15
  -1 -12 -11    0.95    0.13
   1  12  12    9.43    0.43
  -1  12 -12    8.90    0.40
  -1  12 -12    9.40    0.42
  -1 -12 -12    9.63    0.47
  -1 -12 -12    9.58    0.39
  -1  12 -13    0.24    0.10
  -1  12 -13    0.19    0.11
  -1 -12 -13    0.26    0.09
  -1 -12 -13    0.18    0.11
  -1  12 -14    0.45    0.09
  -1  12 -14    0.60    0.09
  -1 -12 -14    0.79    0.09
   1  13 -14    0.64    0.09
   1  13 -14    0.58    0.08
   1  13 -13    1.32    0.14
   1  13 -13    1.17    0.12
   1 -13 -13    1.05    0.14
   1  13 -12    6.54    0.33
   1  13 -12    7.10    0.32
   1 -13 -12    7.25    0.39
   1  13 -11    0.02    0.12
   1  13 -11    0.09    0.11
   1 -13 -11   -0.05    0.12
   1  13 -10    5.00    0.29
   1  13 -10    5.16    0.31
   1 -13 -10    4.39    0.34
   1  13  -9    0.18    0.12
   1  13  -9    0.21    0.11
   1  13  -9    0.22    0.12
  -1 -13   9    0.06    0.09
  -1 -13   9    0.12    0.10
   1 -13  -9    0.02    0.12
   1  13  -8   10.17    0.45
   1  13  -8    9.75    0.41
  -1  13   8    9.07    0.44
   1  13  -8    9.04    0.43
  -1 -13   8    9.22    0.40
   1 -13  -8    8.37    0.47
   1  13  -7   15.30    0.59
   1  13  -7   14.67    0.55
  -1  13   7   14.22    0.60
   1  13  -7   16.81    0.63
   1  13  -7   14.74    0.59
  -1 -13   7   14.54    0.56
   1 -13  -7   13.18    0.67
  -1  13   6   21.85    0.83
   1  13  -6   22.29    0.82
  -1 -13   6   22.37    0.77
   1 -13  -6   21.99    0.86
  -1  13   5   24.07    0.85
   1  13  -5   22.40    0.84
  -1 -13   5   23.09    0.78
   1 -13  -5   22.54    0.88
   1  13  -4    2.54    0.19
   1 -13  -4    2.39    0.20
   1  13  -3    0.17    0.08
  -1  13   3    0.14    0.07
  -1  13   3    0.19    0.07
  -1  13   2   34.05    1.23
   1  13  -2   36.03    1.24
  -1  13   2   36.27    1.22
   1  13  -2   35.80    1.21
  -1  13   1    3.07    0.18
   1  13  -1    2.69    0.19
   1  13  -1    3.11    0.17
  -1  13   1    2.78    0.17
   1  13   0   10.70    0.43
  -1  13   0   10.92    0.42
   1  13   0   11.11    0.42
  -1  13   0   10.44    0.43
  -1  13  -1    4.26    0.21
   1  13   1    4.46    0.22
   1  13   1    3.86    0.22
  -1  13  -1    4.09    0.23
   1  13   2    7.98    0.37
  -1  13  -2    8.50    0.35
  -1  13  -2    8.66    0.37
   1  13   2    8.98    0.37
   1  13   3   41.10    1.47
   1  13   3   44.61    1.46
  -1  13  -3   41.13    1.43
  -1  13  -3   42.46    1.46
  -1  13  -4   25.55    0.94
   1  13   4   26.93    0.95
   1  13   4   24.83    0.93
  -1  13  -5   46.79    1.61
   1  13   5   48.33    1.62
   1 -13   5   46.61    1.48
  -1 -13  -5   43.58    1.63
  -1  13  -6    0.84    0.14
   1  13   6    0.58    0.13
   1 -13   6    0.58    0.11
  -1  13  -7    0.52    0.12
  -1  13  -7    0.53    0.14
  -1  13  -7    0.61    0.12
   1  13   7    0.45    0.13
  -1 -13  -7    0.39    0.12
   1 -13   7    0.54    0.11
   1 -13   7    0.59    0.11
  -1  13  -8    4.09    0.26
  -1  13  -8    4.06    0.26
   1  13   8    4.18    0.29
  -1  13  -8    4.18    0.28
  -1 -13  -8    3.58    0.28
   1 -13   8    3.64    0.24
  -1 -13  -8    3.91    0.23
  -1  13  -9    5.32    0.30
  -1  13  -9    4.83    0.31
   1  13   9    4.82    0.31
  -1 -13  -9    4.64    0.33
   1 -13   9    4.21    0.27
  -1 -13  -9    5.05    0.26
  -1  13 -10    3.53    0.26
  -1  13 -10    3.24    0.27
  -1 -13 -10    3.78    0.23
  -1 -13 -10    3.69    0.30
  -1  13 -11    0.80    0.14
  -1  13 -11    0.79    0.15
   1  13  11    0.67    0.13
  -1 -13 -11    0.70    0.15
  -1 -13 -11    0.84    0.12
  -1  13 -12    0.04    0.10
  -1  13 -12    0.05    0.11
   1  13  12    0.12    0.10
  -1 -13 -12   -0.02    0.11
  -1 -13 -12    0.12    0.08
  -1  13 -13    0.46    0.11
  -1  13 -13    0.15    0.10
  -1 -13 -13    0.53    0.09
  -1 -13 -13    0.50    0.11
  -1  13 -14    4.63    0.22
  -1  13 -14    4.96    0.21
   1  14 -13    0.24    0.08
   1  14 -13    0.42    0.09
   1 -14 -13    0.37    0.10
   1  14 -12    0.88    0.13
   1  14 -12    0.88    0.12
   1 -14 -12    0.92    0.15
   1  14 -11    2.57    0.22
   1  14 -11    2.21    0.19
   1 -14 -11    2.27    0.23
   1  14 -10    7.96    0.38
   1  14 -10    8.36    0.40
  -1 -14  10    7.81    0.39
   1 -14 -10    8.97    0.46
   1  14  -9    0.55    0.13
   1  14  -9    0.48    0.13
   1  14  -9    0.53    0.14
  -1 -14   9    0.52    0.12
   1 -14  -9    0.38    0.14
   1  14  -8    0.88    0.14
   1  14  -8    1.22    0.16
   1  14  -8    1.50    0.17
  -1  14   8    1.28    0.18
   1 -14  -8    1.32    0.18
  -1 -14   8    1.09    0.15
  -1 -14   8    1.20    0.15
   1  14  -7   23.14    0.87
  -1  14   7   23.93    0.89
   1  14  -7   23.24    0.86
   1  14  -7   25.82    0.91
   1  14  -7   23.22    0.82
  -1 -14   7   22.87    0.81
   1 -14  -7   22.98    0.74
   1 -14  -7   23.48    1.00
  -1 -14   7   22.53    0.89
   1  14  -6    9.14    0.39
  -1  14   6    8.41    0.40
   1  14  -6    8.12    0.39
   1  14  -6    9.66    0.42
   1  14  -6    8.95    0.37
  -1 -14   6    8.13    0.39
   1 -14  -6    8.19    0.42
  -1 -14   6    7.96    0.35
  -1  14   5   19.15    0.70
   1  14  -5   17.34    0.69
  -1 -14   5   18.08    0.63
   1 -14  -5   17.49    0.72
   1  14  -4    4.08    0.25
  -1  14   4    4.59    0.25
  -1 -14   4    4.40    0.21
   1 -14  -4    4.67    0.27
  -1  14   3   38.96    1.39
  -1  14   3   41.16    1.38
   1  14  -3   40.71    1.40
  -1  14   2   46.76    1.59
   1  14  -2   46.06    1.60
   1  14  -2   45.69    1.57
  -1  14   2   47.85    1.58
  -1  14   1   14.17    0.56
   1  14  -1   15.29    0.58
   1  14  -1   14.89    0.55
  -1  14   1   15.26    0.56
   1  14   0   71.60    2.48
  -1  14   0   75.00    2.48
  -1  14   0   75.10    2.45
   1  14   0   73.78    2.45
   1  14   1   11.79    0.48
  -1  14  -1   11.45    0.47
  -1  14  -1   12.14    0.46
   1  14   1   12.13    0.47
   1  14   2    0.10    0.08
  -1  14  -2    0.06    0.08
   1  14   2    0.09    0.07
  -1  14  -2    0.12    0.07
   1  14   3   25.18    0.94
   1  14   3   27.34    0.94
  -1  14  -3   24.60    0.90
  -1  14  -3   26.26    0.94
  -1  14  -4    5.38    0.29
   1  14   4    5.17    0.29
   1  14   4    5.00    0.28
  -1  14  -5   30.30    1.08
   1  14   5   31.26    1.10
  -1 -14  -5   28.46    1.10
  -1  14  -6    3.81    0.24
   1  14   6    3.77    0.28
  -1  14  -6    4.27    0.27
  -1  14  -6    4.02    0.26
  -1 -14  -6    3.99    0.28
   1 -14   6    3.93    0.25
  -1  14  -7    5.91    0.33
   1  14   7    6.33    0.36
  -1  14  -7    6.35    0.31
  -1  14  -7    6.00    0.33
   1 -14   7    6.08    0.31
  -1 -14  -7    5.95    0.36
  -1  14  -8   24.25    0.89
  -1  14  -8   24.04    0.84
  -1  14  -8   24.51    0.90
   1  14   8   25.48    0.94
   1 -14   8   23.75    0.87
   1 -14   8   23.18    0.90
  -1 -14  -8   23.70    1.02
   1  14   9    5.33    0.32
  -1  14  -9    5.40    0.30
  -1  14  -9    5.05    0.32
  -1 -14  -9    4.86    0.34
  -1 -14  -9    4.98    0.25
  -1  14 -10    4.05    0.26
  -1  14 -10    4.04    0.29
  -1 -14 -10    3.68    0.22
  -1 -14 -10    3.97    0.31
   1  14  11    1.80    0.18
  -1  14 -11    1.76    0.18
  -1  14 -11    1.75    0.17
  -1 -14 -11    2.15    0.23
  -1 -14 -11    2.26    0.17
  -1  14 -12    0.51    0.13
  -1  14 -12    0.58    0.12
   1  14  12    0.51    0.11
  -1 -14 -12    0.50    0.09
  -1 -14 -12    0.54    0.13
  -1  14 -13    1.37    0.12
  -1  14 -13    1.39    0.13
  -1 -14 -13    1.51    0.15
  -1 -14 -13    1.25    0.12
   1  15 -13    0.29    0.08
   1  15 -13    0.35    0.08
   1 -15 -13    0.28    0.09
   1  15 -12    0.19    0.09
   1  15 -12    0.13    0.10
   1 -15 -12    0.32    0.12
   1  15 -11    2.79    0.23
   1  15 -11    3.20    0.22
   1 -15 -11    3.72    0.27
   1  15 -10    0.04    0.11
   1  15 -10    0.08    0.11
  -1 -15  10    0.13    0.09
   1 -15 -10    0.17    0.13
   1  15  -9   19.68    0.72
   1  15  -9   18.83    0.68
  -1 -15   9   18.39    0.73
   1 -15  -9   18.08    0.82
   1  15  -8    1.65    0.17
  -1  15   8    1.49    0.18
   1  15  -8    1.75    0.19
   1  15  -8    1.44    0.15
   1 -15  -8    1.14    0.17
  -1 -15   8    1.58    0.16
  -1 -15   8    1.24    0.15
   1  15  -7    5.24    0.28
   1  15  -7    5.16    0.29
  -1  15   7    5.54    0.32
   1  15  -7    5.38    0.31
   1  15  -7    5.91    0.32
  -1 -15   7    5.02    0.30
   1 -15  -7    5.44    0.33
  -1 -15   7    4.96    0.26
   1  15  -6   64.48    2.08
  -1  15   6   66.70    2.22
   1  15  -6   64.78    2.19
   1  15  -6   63.65    2.22
   1  15  -6   72.38    2.32
  -1 -15   6   65.03    2.30
   1 -15  -6   64.08    2.54
   1 -15  -6   63.80    2.29
  -1 -15   6   62.86    2.06
   1  15  -5    0.23    0.10
   1  15  -5    0.37    0.11
   1  15  -5    0.12    0.09
   1  15  -5    0.23    0.09
  -1  15   5    0.26    0.10
   1 -15  -5    0.36    0.11
  -1 -15   5    0.05    0.07
   1 -15  -5    0.31    0.11
  -1 -15   5    0.33    0.10
  -1  15   4   15.52    0.61
   1  15  -4   16.12    0.62
   1 -15  -4   15.33    0.64
   1  15  -3   36.02    1.26
  -1  15   3   36.33    1.25
  -1  15   3   35.15    1.25
  -1  15   2    9.03    0.39
  -1  15   2    9.18    0.39
   1  15  -2    9.44    0.40
   1  15  -2    8.92    0.37
  -1  15   1    0.41    0.09
   1  15  -1    0.32    0.09
  -1  15   1    0.34    0.09
   1  15  -1    0.33    0.08
   1  15   0    0.56    0.10
  -1  15   0    0.61    0.11
   1  15   0    0.58    0.10
  -1  15   0    0.58    0.10
  -1  15  -1   71.32    2.36
  -1  15  -1   70.16    2.33
   1  15   1   69.59    2.36
   1  15   1   69.21    2.34
  -1  15  -2   25.37    0.90
   1  15   2   25.36    0.90
  -1  15  -2   24.33    0.87
   1  15   2   24.10    0.90
  -1  15  -3    1.16    0.15
   1  15   3    1.53    0.16
   1  15   3    1.36    0.15
  -1  15  -3    1.55    0.14
   1  15   4   82.16    2.69
  -1  15  -4   82.80    2.71
   1  15   4   77.14    2.70
  -1 -15  -4   78.24    2.75
  -1  15  -5    0.51    0.11
  -1  15  -5    0.68    0.14
  -1  15  -5    0.50    0.12
   1  15   5    0.55    0.13
   1 -15   5    0.68    0.11
  -1 -15  -5    0.58    0.12
  -1 -15  -5    0.47    0.11
  -1  15  -6    1.56    0.16
  -1  15  -6    1.63    0.17
   1  15   6    1.32    0.17
  -1  15  -6    1.25    0.16
  -1 -15  -6    1.42    0.17
   1 -15   6    1.40    0.15
  -1  15  -7   18.08    0.70
  -1  15  -7   18.03    0.71
   1  15   7   18.65    0.74
  -1  15  -7   18.13    0.66
   1 -15   7   18.22    0.70
  -1 -15  -7   17.82    0.79
  -1  15  -8    5.53    0.31
   1  15   8    6.58    0.36
  -1  15  -8    5.55    0.32
  -1  15  -8    5.39    0.30
  -1 -15  -8    5.99    0.35
   1 -15   8    5.48    0.30
  -1  15  -9    0.13    0.11
   1  15   9    0.28    0.12
  -1  15  -9    0.16    0.12
  -1 -15  -9    0.49    0.14
  -1  15 -10    0.22    0.11
  -1  15 -10    0.07    0.12
  -1 -15 -10    0.27    0.13
  -1  15 -11    8.08    0.37
  -1  15 -11    7.82    0.35
   1  15  11    8.45    0.38
  -1 -15 -11    8.40    0.42
  -1 -15 -11    8.23    0.34
  -1  15 -12   -0.03    0.09
  -1  15 -12    0.16    0.10
   1  15  12    0.05    0.09
  -1 -15 -12    0.12    0.10
  -1  15 -13    0.04    0.08
  -1  15 -13   -0.03    0.07
  -1 -15 -13    0.17    0.07
   1  16 -13    2.53    0.14
   1  16 -13    2.32    0.15
   1 -16 -13    2.92    0.17
   1  16 -12    0.05    0.08
   1  16 -12   -0.06    0.08
  -1  16  12   -0.03    0.07
   1 -16 -12    0.24    0.10
   1  16 -11    9.73    0.41
  -1  16  11    9.52    0.41
   1  16 -11    9.61    0.39
   1 -16 -11   10.06    0.47
   1  16 -10    6.81    0.34
   1  16 -10    6.90    0.32
  -1 -16  10    6.47    0.32
   1 -16 -10    7.63    0.40
   1  16  -9   11.18    0.45
   1  16  -9   11.27    0.48
  -1 -16   9   10.61    0.47
   1 -16  -9   12.36    0.56
   1  16  -8    5.79    0.31
   1  16  -8    5.66    0.29
  -1  16   8    5.42    0.32
   1 -16  -8    5.65    0.35
  -1 -16   8    5.23    0.31
   1  16  -7    6.49    0.32
  -1  16   7    7.21    0.37
   1  16  -7    6.96    0.35
   1  16  -7    6.75    0.34
   1 -16  -7    7.00    0.38
  -1 -16   7    6.56    0.34
   1  16  -6    0.49    0.11
  -1  16   6    0.62    0.13
   1  16  -6    0.52    0.12
   1  16  -6    0.71    0.13
   1 -16  -6    0.73    0.14
   1 -16  -6    0.70    0.13
  -1 -16   6    0.64    0.12
   1  16  -5   16.65    0.62
  -1  16   5   16.80    0.64
   1  16  -5   15.82    0.64
   1  16  -5   16.10    0.58
  -1 -16   5   16.90    0.65
   1 -16  -5   15.26    0.70
   1 -16  -5   15.55    0.67
   1  16  -4   44.36    1.52
   1  16  -4   43.17    1.48
   1  16  -4   42.67    1.40
  -1  16   4   43.12    1.50
   1 -16  -4   43.87    1.56
   1 -16  -4   41.63    1.70
  -1 -16   4   44.30    1.55
  -1  16   3   45.56    1.64
  -1  16   3   47.64    1.64
   1  16  -3   49.02    1.66
  -1 -16   3   49.42    1.71
   1  16  -2    1.50    0.13
   1  16  -2    1.56    0.16
  -1  16   2    1.52    0.15
  -1  16   2    1.14    0.14
   1  16  -1   26.72    0.95
  -1  16   1   26.62    0.97
  -1  16   1   27.88    0.97
   1  16  -1   27.21    0.98
   1  16   0   20.27    0.77
  -1  16   0   20.91    0.75
  -1  16   0   20.87    0.77
   1  16   0   20.41    0.75
  -1  16  -1    8.10    0.37
   1  16   1    8.39    0.38
   1  16   1    8.36    0.37
  -1  16  -1    8.11    0.35
  -1  16  -2   21.86    0.80
   1  16   2   22.61    0.82
  -1  16  -2   22.61    0.83
   1  16   2   22.08    0.83
  -1  16  -3    4.60    0.25
   1  16   3    4.53    0.27
  -1  16  -3    4.83    0.28
   1  16   3    4.66    0.27
   1 -16   3    4.65    0.25
   1  16   4    0.05    0.09
  -1  16  -4    0.06    0.10
   1  16   4    0.22    0.10
   1 -16   4    0.12    0.08
  -1 -16  -4   -0.01    0.07
  -1  16  -5   17.06    0.66
   1  16   5   18.43    0.71
  -1  16  -5   18.57    0.70
   1 -16   5   17.12    0.68
  -1 -16  -5   17.19    0.70
  -1 -16  -5   16.96    0.75
   1  16   6   16.65    0.67
  -1  16  -6   17.53    0.66
  -1  16  -6   15.52    0.59
  -1  16  -6   15.86    0.63
  -1 -16  -6   16.45    0.72
   1 -16   6   15.91    0.64
  -1  16  -7   30.14    1.03
   1  16   7   31.31    1.14
  -1  16  -7   30.78    1.12
  -1  16  -7   30.91    1.10
  -1 -16  -7   31.13    1.26
   1 -16   7   30.60    1.13
  -1  16  -8    0.85    0.15
  -1  16  -8    1.03    0.15
  -1  16  -8    0.82    0.13
   1  16   8    1.28    0.17
  -1 -16  -8    1.15    0.16
   1 -16   8    1.11    0.14
  -1  16  -9    0.91    0.16
  -1  16  -9    0.79    0.13
   1  16   9    0.88    0.15
  -1 -16  -9    0.76    0.15
  -1  16 -10    3.40    0.25
  -1  16 -10    3.60    0.23
  -1 -16 -10    3.73    0.28
  -1  16 -11    1.01    0.14
  -1  16 -11    1.05    0.13
   1  16  11    1.07    0.13
  -1 -16 -11    0.82    0.14
  -1  16 -12    1.93    0.17
  -1  16 -12    2.02    0.16
   1  16  12    2.03    0.16
  -1 -16 -12    2.13    0.18
  -1  16 -13    0.05    0.06
  -1  16 -13    0.08    0.07
   1  17 -12    0.70    0.10
  -1  17  12    0.60    0.09
   1  17 -12    0.59    0.09
   1 -17 -12    0.57    0.10
   1  17 -11    0.11    0.09
   1  17 -11    0.17    0.08
  -1  17  11    0.13    0.08
   1 -17 -11    0.30    0.11
   1  17 -10    2.09    0.18
   1  17 -10    1.96    0.17
   1 -17 -10    1.91    0.19
  -1 -17  10    1.85    0.17
   1  17  -9    2.47    0.22
   1  17  -9    2.40    0.20
  -1 -17   9    2.13    0.19
   1 -17  -9    2.48    0.25
   1  17  -8   27.67    0.95
   1  17  -8   28.25    1.00
  -1  17   8   26.83    1.02
  -1 -17   8   28.64    1.03
   1 -17  -8   28.12    1.15
   1  17  -7    6.75    0.35
  -1  17   7    6.48    0.36
   1  17  -7    7.31    0.33
   1  17  -7    7.13    0.35
   1 -17  -7    6.85    0.39
  -1 -17   7    7.82    0.36
  -1  17   6   20.06    0.76
   1  17  -6   19.65    0.73
   1  17  -6   18.92    0.69
   1  17  -6   19.77    0.75
  -1 -17   6   19.63    0.75
   1 -17  -6   18.46    0.78
   1 -17  -6   19.11    0.83
   1  17  -5   25.89    0.94
   1  17  -5   26.85    0.97
   1  17  -5   25.34    0.89
  -1  17   5   27.20    0.97
  -1 -17   5   26.10    0.98
   1 -17  -5   25.93    1.07
   1 -17  -5   26.40    1.01
  -1  17   4   22.55    0.83
   1  17  -4   22.15    0.76
   1  17  -4   21.30    0.80
   1  17  -4   23.51    0.84
   1 -17  -4   21.58    0.86
  -1 -17   4   22.77    0.84
   1 -17  -4   22.00    0.86
   1 -17  -4   20.92    0.91
   1  17  -3   12.11    0.49
   1  17  -3   11.46    0.45
  -1  17   3   11.05    0.47
  -1  17   3   10.98    0.47
   1 -17  -3   11.10    0.48
   1 -17  -3   10.68    0.50
   1 -17  -3   10.86    0.49
  -1 -17   3   11.93    0.48
  -1  17   2    6.73    0.32
  -1  17   2    6.57    0.32
   1  17  -2    7.13    0.34
  -1 -17   2    6.05    0.31
   1 -17  -2    6.23    0.31
  -1  17   1    6.24    0.31
  -1  17   1    6.25    0.32
   1  17  -1    6.71    0.33
   1  17  -1    6.49    0.30
  -1 -17   1    6.27    0.31
   1 -17  -1    6.17    0.30
  -1  17   0   14.15    0.54
  -1  17   0   14.38    0.56
   1  17   0   13.50    0.54
   1  17   0   14.07    0.56
   1 -17   0   12.98    0.55
  -1 -17   0   13.95    0.55
  -1  17  -1   22.63    0.81
   1  17   1   21.97    0.82
   1  17   1   21.85    0.84
  -1  17  -1   22.42    0.84
   1 -17   1   22.98    0.84
   1  17   2   25.38    0.96
  -1  17  -2   26.02    0.93
  -1  17  -2   27.76    0.97
   1  17   2   27.54    0.96
   1 -17   2   26.00    0.97
  -1 -17  -2   24.95    0.96
   1  17   3   15.68    0.62
   1  17   3   15.67    0.63
  -1  17  -3   16.85    0.64
   1 -17   3   15.07    0.62
   1  17   4    1.83    0.18
   1  17   4    1.80    0.20
  -1  17  -4    2.04    0.19
   1 -17   4    1.95    0.18
  -1 -17  -4    1.95    0.19
  -1  17  -5   12.76    0.51
  -1  17  -5   13.04    0.55
   1  17   5   12.39    0.54
   1 -17   5   12.93    0.53
  -1 -17  -5   12.42    0.57
  -1  17  -6   12.68    0.54
  -1  17  -6   12.20    0.51
  -1  17  -6   12.50    0.48
   1  17   6   12.37    0.54
   1 -17   6   12.26    0.52
  -1  17  -7   14.04    0.58
   1  17   7   14.62    0.60
  -1  17  -7   13.67    0.52
  -1  17  -7   13.44    0.55
   1 -17   7   13.27    0.56
  -1 -17  -7   14.25    0.63
  -1  17  -8    3.52    0.25
  -1  17  -8    3.64    0.24
  -1  17  -8    2.97    0.24
   1  17   8    3.59    0.26
  -1 -17  -8    3.75    0.27
   1 -17   8    3.67    0.23
  -1  17  -9    0.89    0.13
  -1  17  -9    1.31    0.15
  -1 -17  -9    0.82    0.14
   1 -17   9    1.01    0.13
  -1  17 -10    8.14    0.35
  -1  17 -10    8.04    0.37
  -1 -17 -10    9.43    0.43
  -1  17 -11    0.92    0.13
   1  17  11    1.00    0.12
  -1  17 -11    0.89    0.11
  -1 -17 -11    1.09    0.14
  -1  17 -12    1.80    0.15
   1  17  12    1.97    0.15
  -1  17 -12    1.95    0.14
  -1 -17 -12    2.04    0.16
   1  18 -12    4.83    0.20
   1  18 -12    4.90    0.22
   1 -18 -12    5.29    0.25
   1  18 -11    5.72    0.27
   1  18 -11    5.96    0.25
  -1  18  11    6.01    0.27
   1 -18 -11    5.95    0.30
   1  18 -10    0.79    0.11
   1  18 -10    0.79    0.12
  -1 -18  10    0.86    0.10
   1 -18 -10    1.05    0.14
   1  18  -9    4.36    0.23
   1  18  -9    4.32    0.25
   1 -18  -9    4.64    0.29
  -1 -18   9    4.14    0.24
   1  18  -8    8.42    0.39
   1  18  -8    8.24    0.36
   1 -18  -8    9.27    0.44
  -1 -18   8    9.23    0.40
   1  18  -7   12.37    0.48
  -1  18   7   12.15    0.54
   1  18  -7   12.87    0.51
   1  18  -7   12.52    0.53
  -1 -18   7   12.83    0.53
   1 -18  -7   13.08    0.58
   1  18  -6    1.90    0.18
   1  18  -6    1.84    0.19
  -1  18   6    1.85    0.20
   1  18  -6    2.15    0.19
   1 -18  -6    1.87    0.19
  -1 -18   6    2.14    0.20
   1  18  -5    1.10    0.15
   1  18  -5    0.92    0.15
   1  18  -5    1.09    0.13
  -1  18   5    1.15    0.15
   1 -18  -5    1.41    0.16
   1 -18  -5    1.14    0.16
  -1 -18   5    1.24    0.14
  -1  18   4   29.10    1.05
   1  18  -4   29.83    1.06
   1  18  -4   28.65    1.01
   1 -18  -4   28.54    1.07
   1 -18  -4   27.29    1.16
   1 -18  -4   28.12    1.08
  -1 -18   4   30.49    1.07
   1  18  -3    0.03    0.10
  -1  18   3    0.06    0.09
  -1 -18   3    0.02    0.08
   1 -18  -3    0.15    0.09
   1 -18  -3    0.16    0.09
   1 -18  -3    0.01    0.07
  -1  18   2    9.11    0.41
  -1  18   2    9.03    0.40
   1  18  -2    9.54    0.42
   1 -18  -2    8.25    0.39
  -1 -18   2    8.70    0.40
  -1  18   1   57.55    1.91
   1  18  -1   57.21    1.94
  -1  18   1   55.01    1.92
   1  18  -1   55.03    1.89
   1 -18  -1   55.26    1.98
  -1 -18   1   56.55    1.98
   1  18   0   14.73    0.60
  -1  18   0   15.59    0.60
   1  18   0   16.45    0.63
  -1  18   0   15.41    0.62
  -1 -18   0   14.75    0.61
   1 -18   0   15.52    0.61
  -1  18  -1    4.16    0.27
   1  18   1    4.21    0.25
   1  18   1    3.92    0.26
  -1  18  -1    4.25    0.24
  -1 -18  -1    3.99    0.24
   1 -18   1    4.58    0.25
  -1  18  -2    4.57    0.25
   1  18   2    4.82    0.28
  -1  18  -2    5.10    0.30
   1  18   2    4.55    0.27
   1 -18   2    5.13    0.27
  -1 -18  -2    4.75    0.25
   1  18   3    3.31    0.23
   1  18   3    3.52    0.24
  -1  18  -3    3.60    0.25
   1 -18   3    2.88    0.22
   1  18   4    0.42    0.12
  -1  18  -4    0.79    0.14
  -1 -18  -4    0.63    0.12
   1 -18   4    0.31    0.10
  -1 -18  -4    0.57    0.12
  -1  18  -5    6.62    0.34
  -1  18  -5    6.19    0.31
   1  18   5    6.12    0.34
   1 -18   5    6.03    0.32
  -1 -18  -5    6.09    0.34
   1  18   6   17.08    0.68
  -1  18  -6   16.10    0.64
  -1  18  -6   16.21    0.60
  -1  18  -6   17.13    0.67
   1 -18   6   17.31    0.67
  -1 -18  -6   16.84    0.73
  -1  18  -7    0.98    0.15
   1  18   7    1.12    0.15
  -1  18  -7    1.03    0.15
  -1  18  -7    0.76    0.12
   1 -18   7    0.72    0.12
  -1 -18  -7    1.19    0.16
  -1  18  -8    3.42    0.22
  -1  18  -8    3.35    0.24
  -1  18  -8    3.12    0.23
   1 -18   8    3.11    0.22
  -1 -18  -8    3.33    0.26
  -1  18  -9    9.59    0.40
  -1  18  -9    9.16    0.38
   1 -18   9    8.83    0.39
  -1 -18  -9    9.64    0.45
  -1  18 -10    0.08    0.10
   1  18  10    0.05    0.09
  -1  18 -10    0.09    0.09
  -1 -18 -10    0.14    0.10
  -1  18 -11    0.11    0.07
   1  18  11    0.08    0.08
  -1  18 -11    0.13    0.09
  -1 -18 -11    0.16    0.09
  -1  18 -12    1.12    0.10
  -1 -18 -12    1.37    0.12
   1  19 -11    0.30    0.07
  -1  19  11    0.18    0.07
   1  19 -11    0.21    0.08
   1 -19 -11    0.42    0.09
   1  19 -10    1.60    0.13
   1  19 -10    1.76    0.16
   1 -19 -10    1.72    0.17
  -1 -19  10    1.86    0.14
   1  19  -9    4.82    0.25
   1  19  -9    4.64    0.23
  -1 -19   9    4.53    0.25
   1 -19  -9    4.81    0.29
   1  19  -8    7.09    0.34
   1  19  -8    7.42    0.32
  -1 -19   8    7.45    0.35
   1 -19  -8    8.01    0.39
   1  19  -7   13.34    0.51
   1  19  -7   13.69    0.54
  -1  19   7   13.64    0.58
   1  19  -7   13.36    0.56
   1 -19  -7   14.14    0.62
  -1 -19   7   14.44    0.56
   1  19  -6   15.31    0.61
  -1  19   6   14.46    0.60
   1  19  -6   14.84    0.55
   1  19  -6   15.02    0.58
  -1 -19   6   15.28    0.60
   1 -19  -6   14.83    0.66
   1  19  -5   10.89    0.47
   1  19  -5    9.80    0.42
   1  19  -5    9.36    0.39
  -1  19   5   10.18    0.45
   1 -19  -5   10.19    0.48
  -1 -19   5   10.03    0.44
  -1  19   4    1.05    0.15
   1  19  -4    0.99    0.13
   1  19  -4    1.01    0.15
  -1 -19   4    0.81    0.13
   1 -19  -4    0.96    0.13
   1 -19  -4    0.84    0.13
  -1  19   3    3.45    0.25
   1  19  -3    3.96    0.27
   1 -19  -3    3.12    0.23
  -1 -19   3    3.56    0.23
   1 -19  -3    3.42    0.23
   1 -19  -3    3.75    0.25
  -1  19   2   38.73    1.35
  -1  19   2   38.46    1.33
   1  19  -2   39.60    1.36
   1 -19  -2   35.27    1.49
   1 -19  -2   36.94    1.37
  -1 -19   2   39.05    1.37
   1  19  -1    0.30    0.09
  -1  19   1    0.22    0.10
  -1  19   1    0.49    0.12
   1  19  -1    0.36    0.11
   1 -19  -1    0.42    0.10
  -1 -19   1    0.38    0.10
  -1  19   0   14.41    0.58
  -1  19   0   14.33    0.56
   1  19   0   13.26    0.56
   1  19   0   14.54    0.59
  -1 -19   0   14.17    0.57
   1 -19   0   14.19    0.57
   1  19   1   11.80    0.49
   1  19   1   10.56    0.46
  -1  19  -1   11.09    0.48
  -1  19  -1   10.96    0.45
  -1 -19  -1   10.02    0.45
   1 -19   1   10.61    0.46
  -1  19  -2    3.75    0.26
   1  19   2    3.68    0.25
  -1  19  -2    3.46    0.22
   1  19   2    3.56    0.24
   1 -19   2    3.30    0.23
  -1 -19  -2    3.21    0.21
   1  19   3   10.89    0.47
  -1  19  -3   11.51    0.49
   1  19   3   10.33    0.47
  -1 -19  -3   10.04    0.47
   1 -19   3   10.80    0.47
   1  19   4   20.77    0.80
  -1  19  -4   21.43    0.81
   1 -19   4   20.67    0.81
  -1 -19  -4   21.10    0.87
   1  19   5   12.24    0.53
  -1  19  -5   12.09    0.53
   1 -19   5   13.10    0.52
  -1 -19  -5   12.00    0.56
  -1  19  -6    0.35    0.11
   1  19   6    0.49    0.13
  -1  19  -6    0.38    0.12
  -1 -19  -6    0.56    0.13
   1 -19   6    0.35    0.10
  -1  19  -7    3.57    0.21
  -1  19  -7    3.29    0.25
  -1  19  -7    3.69    0.23
   1 -19   7    3.98    0.24
  -1 -19  -7    3.27    0.25
  -1  19  -8    2.94    0.23
  -1  19  -8    3.35    0.20
  -1  19  -8    3.45    0.22
  -1 -19  -8    3.51    0.25
   1 -19   8    3.38    0.22
  -1  19  -9    0.66    0.12
  -1  19  -9    0.54    0.10
   1 -19   9    0.52    0.10
  -1 -19  -9    0.70    0.13
  -1  19 -10    1.34    0.11
   1  19  10    1.13    0.12
  -1  19 -10    1.16    0.12
  -1 -19 -10    1.42    0.14
  -1  19 -11    1.89    0.14
  -1  19 -11    1.93    0.13
   1  19  11    2.28    0.15
  -1 -19 -11    2.24    0.16
   1  20 -11    1.01    0.09
   1 -20 -11    1.13    0.12
   1  20 -10    7.47    0.31
  -1  20  10    7.96    0.33
   1  20 -10    7.50    0.29
  -1 -20  10    7.59    0.32
   1 -20 -10    8.58    0.36
   1  20  -9    0.60    0.10
   1  20  -9    0.43    0.09
   1 -20  -9    0.42    0.10
  -1 -20   9    0.42    0.09
   1  20  -8    0.23    0.09
   1  20  -8    0.17    0.10
   1 -20  -8    0.24    0.10
  -1 -20   8    0.16    0.09
   1  20  -7   17.98    0.63
   1  20  -7   18.01    0.67
   1  20  -7   17.30    0.69
  -1 -20   7   18.51    0.70
   1 -20  -7   18.31    0.76
  -1  20   6    2.13    0.21
   1  20  -6    2.26    0.21
   1  20  -6    2.44    0.18
   1  20  -6    2.23    0.19
  -1 -20   6    2.12    0.20
   1 -20  -6    2.37    0.21
  -1  20   5    2.27    0.21
   1  20  -5    2.40    0.23
   1  20  -5    2.57    0.20
  -1 -20   5    2.83    0.21
   1 -20  -5    2.44    0.22
   1  20  -4    3.84    0.27
  -1  20   4    3.99    0.26
   1 -20  -4    3.54    0.24
   1 -20  -4    3.43    0.24
  -1 -20   4    3.58    0.24
  -1  20   3   11.74    0.49
   1  20  -3   11.35    0.50
  -1 -20   3   11.24    0.48
   1 -20  -3   10.49    0.47
   1 -20  -3   10.91    0.50
  -1  20   2   59.63    1.99
   1  20  -2   59.78    2.02
  -1  20   2   58.25    2.01
  -1 -20   2   59.96    2.06
   1 -20  -2   57.55    2.06
   1 -20  -2   55.64    2.25
  -1  20   1   11.08    0.47
  -1  20   1    9.93    0.44
   1  20  -1    9.26    0.45
   1  20  -1   10.51    0.47
   1 -20  -1   10.14    0.45
  -1 -20   1   10.41    0.44
   1  20   0   36.21    1.28
  -1  20   0   35.31    1.26
  -1  20   0   35.65    1.24
   1  20   0   33.88    1.24
   1 -20   0   35.25    1.29
  -1 -20   0   35.80    1.28
  -1  20  -1    0.90    0.13
   1  20   1    0.92    0.15
   1  20   1    0.87    0.13
  -1  20  -1    0.71    0.14
  -1 -20  -1    0.79    0.12
   1 -20   1    0.97    0.13
   1  20   2    2.23    0.21
  -1  20  -2    2.06    0.19
   1  20   2    1.84    0.18
   1 -20   2    1.61    0.16
  -1 -20  -2    2.07    0.18
  -1  20  -3   16.30    0.64
   1  20   3   14.57    0.62
   1  20   3   15.17    0.62
  -1 -20  -3   14.80    0.66
   1 -20   3   16.50    0.63
  -1  20  -4    3.16    0.25
   1  20   4    3.06    0.24
  -1 -20  -4    3.14    0.23
   1 -20   4    3.12    0.23
   1  20   5   26.81    1.00
  -1  20  -5   27.86    1.00
  -1 -20  -5   27.08    1.10
   1 -20   5   27.05    1.01
  -1  20  -6    0.82    0.12
   1  20   6    0.57    0.13
  -1  20  -6    0.74    0.13
   1 -20   6    0.91    0.13
  -1 -20  -6    0.95    0.14
  -1  20  -7   17.46    0.65
  -1  20  -7   17.20    0.68
   1 -20   7   18.58    0.68
  -1 -20  -7   17.42    0.75
  -1  20  -8    9.24    0.36
  -1  20  -8    9.75    0.39
  -1  20  -8    9.03    0.41
   1 -20   8    9.52    0.40
  -1 -20  -8   10.26    0.45
  -1  20  -9    3.01    0.19
  -1  20  -9    2.94    0.17
   1 -20   9    2.73    0.17
  -1 -20  -9    3.29    0.22
  -1  20 -10    1.91    0.15
  -1  20 -10    2.00    0.13
   1  20  10    1.96    0.15
  -1 -20 -10    1.87    0.16
  -1 -20 -11    0.89    0.09
   1  21 -10    1.02    0.09
  -1  21  10    0.77    0.09
   1  21 -10    0.94    0.08
   1 -21 -10    0.93    0.10
   1  21  -9   15.19    0.52
   1  21  -9   15.09    0.55
  -1 -21   9   15.45    0.57
   1 -21  -9   15.30    0.63
   1  21  -8    0.79    0.10
   1  21  -8    0.95    0.11
  -1 -21   8    0.75    0.11
   1 -21  -8    0.87    0.12
   1  21  -7    6.78    0.28
   1  21  -7    6.53    0.30
   1  21  -7    7.02    0.33
   1 -21  -7    7.22    0.35
  -1 -21   7    7.00    0.32
   1  21  -6   10.55    0.43
   1  21  -6   11.64    0.48
   1 -21  -6   10.54    0.50
  -1 -21   6   11.18    0.46
   1  21  -5    2.07    0.19
   1  21  -5    1.93    0.18
   1 -21  -5    2.12    0.19
  -1 -21   5    1.98    0.19
   1  21  -4    6.28    0.33
  -1  21   4    6.03    0.32
   1 -21  -4    5.42    0.31
  -1 -21   4    5.69    0.30
  -1  21   3    8.84    0.41
   1  21  -3    8.98    0.43
   1 -21  -3    8.57    0.42
   1 -21  -3    9.03    0.40
  -1 -21   3    9.07    0.41
  -1  21   2    2.22    0.21
  -1  21   2    1.90    0.19
   1  21  -2    2.11    0.20
   1 -21  -2    2.02    0.19
  -1 -21   2    2.53    0.20
  -1  21   1    4.37    0.26
   1  21  -1    4.62    0.29
  -1  21   1    3.96    0.27
  -1 -21   1    3.95    0.25
   1 -21  -1    3.79    0.25
  -1  21   0    2.70    0.21
   1  21   0    3.11    0.25
  -1  21   0    2.91    0.24
   1  21   0    2.65    0.21
   1 -21   0    2.88    0.22
  -1 -21   0    2.77    0.21
  -1  21  -1   40.88    1.43
   1  21   1   40.22    1.43
   1  21   1   39.15    1.41
  -1  21  -1   39.35    1.40
   1 -21   1   41.79    1.46
  -1 -21  -1   40.52    1.45
   1  21   2   13.62    0.58
  -1  21  -2   14.23    0.59
   1  21   2   14.79    0.59
   1 -21   2   15.24    0.59
  -1 -21  -2   13.55    0.57
  -1  21  -3    1.55    0.18
   1  21   3    1.30    0.16
   1  21   3    1.57    0.17
   1 -21   3    1.52    0.15
  -1 -21  -3    1.29    0.15
  -1  21  -4   26.83    0.96
   1  21   4   24.84    0.95
   1 -21   4   26.59    0.97
  -1 -21  -4   25.28    1.05
  -1  21  -5    0.11    0.11
  -1 -21  -5    0.24    0.10
   1 -21   5    0.24    0.10
  -1  21  -6    1.47    0.16
  -1 -21  -6    1.58    0.16
   1 -21   6    1.47    0.15
  -1  21  -7   16.72    0.66
  -1  21  -7   17.35    0.62
  -1 -21  -7   17.42    0.72
   1 -21   7   17.43    0.66
  -1  21  -8    2.08    0.16
   1 -21   8    1.88    0.16
  -1 -21  -8    1.98    0.17
  -1  21  -9    0.50    0.09
   1  21   9    0.48    0.09
   1 -21   9    0.55    0.08
  -1 -21  -9    0.52    0.10
  -1  21 -10    1.22    0.11
   1  21  10    1.13    0.10
  -1 -21 -10    1.29    0.12
   1  22  -9    4.88    0.22
  -1 -22   9    5.18    0.23
   1 -22  -9    5.80    0.26
   1  22  -8    2.66    0.16
   1 -22  -8    2.30    0.18
  -1 -22   8    2.43    0.17
   1  22  -7    0.09    0.08
   1 -22  -7    0.08    0.08
  -1 -22   7    0.00    0.07
   1  22  -6    0.68    0.10
   1  22  -6    0.80    0.13
   1 -22  -6    0.92    0.12
  -1 -22   6    0.64    0.11
   1  22  -5    3.69    0.25
  -1 -22   5    3.89    0.23
   1 -22  -5    3.51    0.23
   1  22  -4    3.67    0.26
   1 -22  -4    3.47    0.23
  -1 -22   4    3.72    0.23
   1  22  -3    3.42    0.25
  -1 -22   3    3.36    0.22
   1 -22  -3    2.83    0.21
   1 -22  -3    3.01    0.22
  -1  22   2   12.86    0.55
   1  22  -2   13.94    0.57
  -1  22   2   12.91    0.54
   1 -22  -2   13.15    0.54
  -1 -22   2   13.56    0.54
  -1  22   1   16.69    0.66
  -1  22   1   16.59    0.65
   1  22  -1   17.35    0.68
   1 -22  -1   16.47    0.66
  -1 -22   1   17.03    0.66
   1  22   0   11.18    0.48
  -1  22   0   10.06    0.45
  -1  22   0   10.26    0.47
   1  22   0   10.16    0.45
   1 -22   0   11.25    0.46
  -1 -22   0   10.94    0.45
   1  22   1   11.46    0.50
  -1  22  -1   12.79    0.52
   1  22   1   11.82    0.51
  -1 -22  -1   12.01    0.50
   1 -22   1   12.38    0.51
  -1  22  -2    4.21    0.27
   1  22   2    3.92    0.26
   1  22   2    4.02    0.25
  -1 -22  -2    3.97    0.25
  -1 -22  -2    3.87    0.24
   1 -22   2    4.24    0.25
  -1  22  -3    1.35    0.16
  -1 -22  -3    1.10    0.14
   1 -22   3    1.37    0.15
  -1  22  -4    1.08    0.15
   1 -22   4    1.14    0.13
  -1 -22  -4    0.91    0.13
  -1  22  -5    0.18    0.10
   1 -22   5    0.21    0.09
  -1 -22  -5    0.22    0.10
  -1  22  -6    3.94    0.24
   1 -22   6    4.26    0.24
  -1 -22  -6    4.50    0.26
  -1 -22  -7   12.85    0.54
   1 -22   7   12.28    0.49
  -1 -22  -8    6.02    0.29
   1 -22   8    5.63    0.26
   1  22   9   11.29    0.44
  -1 -22  -9   12.05    0.49
  -1  23   9    1.50    0.11
  -1 -23   8   12.22    0.47
   1 -23  -8   12.88    0.52
   1 -23  -7    1.44    0.15
  -1 -23   7    1.49    0.12
  -1 -23   6    0.70    0.10
   1 -23  -6    0.83    0.11
   1  23  -5    3.71    0.24
  -1 -23   5    3.87    0.23
   1 -23  -5    4.05    0.23
   1  23  -4    1.06    0.14
   1 -23  -4    0.81    0.11
  -1 -23   4    0.77    0.11
   1  23  -3    4.87    0.29
  -1 -23   3    5.59    0.27
   1 -23  -3    5.11    0.26
   1 -23  -3    4.75    0.27
   1  23  -2    8.11    0.37
   1 -23  -2    7.41    0.34
  -1 -23   2    6.92    0.34
  -1  23   1    0.28    0.10
   1  23  -1    0.10    0.10
  -1 -23   1    0.23    0.09
   1 -23  -1    0.21    0.09
   1  23   0   40.11    1.41
  -1  23   0   39.65    1.41
  -1 -23   0   39.27    1.43
   1 -23   0   41.56    1.44
   1  23   1    2.68    0.21
  -1  23  -1    2.50    0.22
  -1 -23  -1    2.19    0.18
  -1 -23  -1    2.45    0.19
   1 -23   1    2.57    0.20
  -1  23  -2   29.97    1.05
   1  23   2   28.26    1.04
   1 -23   2   29.35    1.06
  -1 -23  -2   28.79    1.05
  -1 -23  -2   28.42    1.15
  -1  23  -3    3.00    0.22
   1 -23   3    2.67    0.21
  -1 -23  -3    2.89    0.20
  -1  23  -4    1.03    0.14
  -1 -23  -4    1.17    0.13
   1 -23   4    1.15    0.13
  -1  23  -5    3.80    0.24
   1 -23   5    4.56    0.24
  -1 -23  -5    4.35    0.25
   1 -23   6   10.33    0.42
  -1 -23  -6   10.41    0.46
   1 -23   7    5.23    0.25
  -1 -23  -7    5.53    0.27
   1  23   8    0.97    0.10
  -1 -23  -8    0.80    0.10
   1 -23   8    1.10    0.10
  -1  24   8    1.20    0.10
  -1 -24   7    9.54    0.37
   1 -24  -7    9.05    0.39
   1 -24  -6    0.18    0.07
  -1 -24   6    0.09    0.07
  -1 -24   5    0.99    0.11
   1 -24  -5    1.01    0.11
   1 -24  -4    5.14    0.26
  -1 -24   4    5.19    0.26
   1  24  -3    0.16    0.09
   1 -24  -3    0.02    0.07
  -1 -24   3   -0.01    0.08
   1  24  -2    3.85    0.24
   1 -24  -2    3.66    0.22
  -1 -24   2    3.85    0.22
   1  24  -1   45.09    1.57
  -1  24   1   45.07    1.57
  -1 -24   1   45.24    1.60
   1 -24  -1   46.30    1.61
  -1  24   0    0.61    0.11
   1  24   0    0.47    0.11
  -1 -24   0    0.46    0.10
   1 -24   0    0.46    0.10
   1  24   1    2.12    0.19
  -1  24  -1    1.83    0.17
  -1 -24  -1    2.00    0.17
   1 -24   1    2.13    0.18
  -1  24  -2   10.86    0.46
  -1 -24  -2   10.43    0.47
   1 -24   2   11.46    0.46
  -1  24  -3    9.06    0.40
  -1 -24  -3    8.89    0.41
   1 -24   3    9.13    0.39
   1 -24   4    0.85    0.11
  -1 -24  -4    0.77    0.11
   1 -24   5    0.31    0.08
  -1 -24  -5    0.23    0.08
  -1 -24  -6    7.66    0.34
   1 -24   6    7.46    0.32
   1  24   7    2.11    0.14
  -1 -24  -7    2.28    0.15
   1 -24   7    1.91    0.13
   1 -25  -6    1.52    0.12
  -1 -25   6    1.40    0.12
  -1 -25   5    5.56    0.25
   1 -25  -5    5.87    0.27
  -1 -25   4    1.78    0.15
  -1 -25   3    5.57    0.26
  -1 -25   2   13.76    0.53
   1 -25  -2   13.29    0.52
  -1 -25   1    3.98    0.21
   1 -25  -1    3.64    0.21
  -1 -25   0   11.20    0.46
   1 -25   0   11.96    0.46
   1 -25   1   29.45    1.05
  -1 -25  -1   28.81    1.04
   1 -25   2   15.54    0.59
  -1 -25  -3   20.13    0.80
   1 -25   3   20.37    0.75
   1 -25   4    3.69    0.20
  -1 -25  -4    3.92    0.21
   1 -25   5    8.01    0.33
  -1 -25  -5    7.81    0.34
   1  25   6    1.48    0.11
  -1 -25  -6    1.21    0.11
   1 -25   6    1.26    0.11
  -1 -26   5    5.11    0.22
  -1 -26   4    0.09    0.06
  -1 -26   3    5.66    0.25
  -1 -26   2   25.68    0.92
   1 -26  -2   25.92    0.92
  -1 -26   1    0.83    0.09
   1 -26  -1    0.76    0.09
  -1 -26   0   32.44    1.16
   1 -26   0   33.25    1.16
   1 -26   1    0.72    0.09
   1 -26   2    1.89    0.14
   1 -26   3    0.45    0.08
  -1 -26  -4    4.51    0.22
   1 -26   4    4.91    0.22
   1 -26   5    3.13    0.16
  -1 -27   2    1.28    0.11
  -1 -27   1    0.21    0.06
   1 -27   0    0.53    0.07
   1 -27   1   12.90    0.48
   1 -27   2    1.44    0.11
   1 -27   3    1.20    0.10
   2   0 -16    9.70    0.38
   2   0 -15    0.03    0.09
   2   0 -14    5.15    0.28
   2   0 -13    0.08    0.10
   2   0 -12   40.26    1.39
  -2   0  11    0.06    0.08
   2   0 -11    0.10    0.09
  -2   0  10   14.35    0.52
  -2   0   9    0.10    0.07
   2   0  -8    9.55    0.39
  -2   0   8   10.15    0.37
  -2   0   7    0.19    0.08
  -2   0   7    0.17    0.06
   2   0  -7    0.22    0.06
  -2   0   6  145.86    4.57
   2   0  -6  147.30    4.89
  -2   0   6  147.54    4.46
   2   0  -5    0.23    0.06
  -2   0   5    0.14    0.06
   2   0  -5    0.18    0.05
  -2   0   5    0.11    0.05
  -2   0   5    0.19    0.05
  -2   0   4   47.75    1.51
   2   0  -4   47.34    1.61
  -2   0   4   47.98    1.51
   2   0  -4   47.63    1.50
  -2   0   4   47.93    1.47
  -2   0   3   -0.08    0.04
   2   0  -3   -0.13    0.04
  -2   0   3   -0.14    0.04
   2   0  -3   -0.12    0.03
  -2   0   2  678.11   20.35
   2   0  -2  649.23   20.33
   2   0  -2  676.62   21.96
   2   0  -2  632.65   20.32
  -2   0   2  679.97   20.35
  -2   0   0  223.77    8.86
  -2   0  -1    0.08    0.02
  -2   0  -1    0.08    0.03
   2   0   1    0.12    0.02
   2   0   2  973.25   30.18
   2   0   2  988.92   30.19
  -2   0  -2  986.19   30.19
   2   0   2  975.57   29.74
  -2   0  -2 1000.00   30.19
  -2   0  -3   -0.17    0.04
   2   0   3   -0.16    0.04
  -2   0  -3   -0.19    0.04
   2   0   3   -0.14    0.03
  -2   0  -4    6.62    0.27
   2   0   4    6.58    0.26
   2   0   4    6.85    0.24
  -2   0  -5    0.18    0.06
   2   0   5    0.11    0.05
   2   0   5    0.14    0.06
  -2   0  -6    3.11    0.18
   2   0   6    2.73    0.15
   2   0   6    2.92    0.14
   2   0   7    0.33    0.08
   2   0   8  136.97    4.20
   2   0   9    0.10    0.08
  -2   0 -10   43.82    1.43
   2   0  10   44.60    1.44
   2   0  11    0.01    0.09
  -2   0 -11   -0.15    0.08
  -2   0 -11    0.22    0.10
  -2   0 -12    6.92    0.36
  -2   0 -12    7.06    0.33
  -2   0 -13   -0.14    0.12
  -2   0 -13   -0.12    0.09
  -2   0 -14    7.67    0.34
  -2   0 -15    0.08    0.08
   2   1 -16    0.59    0.09
   2  -1 -16    0.53    0.09
   2   1 -15    0.18    0.10
   2  -1 -15    0.12    0.10
   2   1 -14    1.20    0.15
   2  -1 -14    1.15    0.15
   2   1 -13    7.01    0.35
   2  -1 -13    7.39    0.36
   2   1 -12    0.82    0.13
   2  -1 -12    0.85    0.13
  -2   1  11    0.40    0.10
   2   1 -11    0.52    0.11
  -2  -1  11    0.46    0.11
   2  -1 -11    0.50    0.11
  -2   1  10   27.83    0.93
  -2  -1  10   27.78    0.93
  -2   1   9   15.92    0.55
  -2  -1   9   15.44    0.55
   2   1  -8   23.96    0.85
  -2   1   8   24.89    0.79
   2  -1  -8   23.61    0.85
  -2  -1   8   23.64    0.79
  -2   1   7    8.69    0.37
   2   1  -7    8.50    0.34
  -2   1   7    9.45    0.32
  -2  -1   7    8.29    0.36
   2  -1  -7    8.67    0.34
  -2  -1   7    8.68    0.32
  -2   1   6   20.28    0.70
   2   1  -6   19.88    0.71
  -2   1   6   20.74    0.65
  -2  -1   6   19.78    0.70
   2  -1  -6   20.20    0.71
  -2  -1   6   20.15    0.65
  -2   1   5    9.98    0.37
  -2   1   5   10.22    0.33
  -2   1   5    9.56    0.37
   2   1  -5    9.87    0.37
   2  -1  -5    9.98    0.37
  -2  -1   5    9.63    0.37
  -2  -1   5   10.06    0.37
  -2  -1   5    9.72    0.34
  -2   1   4   94.64    2.89
  -2   1   4   94.63    2.82
  -2   1   4   91.36    2.89
   2   1  -4   92.37    3.09
   2   1  -4   92.34    2.88
   2  -1  -4   91.98    2.88
   2  -1  -4   93.16    3.09
  -2  -1   4   93.50    2.89
  -2  -1   4   91.59    2.82
  -2  -1   4   92.40    2.88
  -2   1   3  331.70   10.02
  -2   1   3  327.37    9.84
   2   1  -3  325.36   10.79
   2   1  -3  326.10   10.01
  -2   1   3  328.84   10.02
   2  -1  -3  328.90   10.79
  -2  -1   3  323.39   10.02
   2  -1  -3  320.37   10.01
  -2  -1   3  326.08   10.02
  -2   1   2  253.42    7.50
  -2   1   2  248.32    7.50
   2   1  -2  248.81    8.08
   2   1  -2  231.68    7.49
   2   1  -2  235.68    7.49
  -2  -1   2  250.73    7.50
  -2  -1   2  258.87    7.49
   2  -1  -2  246.20    7.49
   2  -1  -2  231.19    7.50
   2  -1  -2  238.86    8.08
   2   1  -1   91.60    3.62
  -2   1   1   97.07    2.78
  -2   1   1   82.93    2.79
  -2   1   0  292.72   12.10
   2   1   0  315.65   12.12
  -2  -1   0  313.27   12.13
   2   1   1   46.01    1.44
  -2   1  -1   48.38    1.44
  -2   1  -1   45.95    1.44
   2   1   1   45.72    1.44
  -2  -1  -1   47.26    1.44
   2  -1   1   45.16    1.45
   2  -1   1   47.24    1.44
  -2   1  -2  601.64   17.78
   2   1   2  577.78   17.77
  -2   1  -2  563.69   17.77
  -2  -1  -2  587.06   17.76
  -2  -1  -2  595.79   17.78
   2  -1   2  581.88   17.51
   2  -1   2  575.59   17.76
   2  -1   2  552.97   17.75
  -2   1  -3    0.77    0.07
   2   1   3    0.59    0.06
   2   1   3    0.45    0.05
  -2   1  -3    0.65    0.06
  -2  -1  -3    0.55    0.06
   2  -1   3    0.56    0.06
   2  -1   3    0.70    0.06
  -2  -1  -3    0.54    0.06
  -2   1  -4    4.73    0.20
   2   1   4    4.35    0.19
  -2   1  -4    4.33    0.19
   2   1   4    4.46    0.17
   2  -1   4    4.42    0.17
   2  -1   4    4.58    0.20
  -2  -1  -4    4.23    0.19
  -2  -1  -4    4.45    0.19
   2   1   5    0.40    0.06
  -2   1  -5    0.45    0.07
   2   1   5    0.38    0.07
   2   1   5    0.41    0.06
   2  -1   5    0.53    0.06
   2  -1   5    0.49    0.08
  -2  -1  -5    0.53    0.08
   2   1   6   42.72    1.26
  -2   1  -6   38.90    1.31
   2   1   6   39.96    1.32
   2  -1   6   39.25    1.25
  -2  -1  -6   40.34    1.31
   2  -1   6   38.49    1.32
   2   1   7    0.37    0.08
   2  -1   7    0.44    0.08
   2   1   8    6.12    0.27
   2  -1   8    6.13    0.27
   2   1   9   34.35    1.12
   2  -1   9   33.57    1.12
  -2   1 -10    4.73    0.26
   2   1  10    5.18    0.27
  -2  -1 -10    5.18    0.26
   2  -1  10    5.19    0.27
   2   1  11   35.29    1.20
  -2   1 -11   36.39    1.19
  -2   1 -11   35.10    1.24
  -2   1 -11   36.31    1.26
  -2  -1 -11   37.69    1.20
   2  -1  11   35.96    1.20
  -2  -1 -11   35.15    1.24
  -2   1 -12    0.29    0.15
  -2   1 -12    0.37    0.14
  -2   1 -12    0.12    0.09
  -2  -1 -12    0.18    0.10
  -2  -1 -12    0.17    0.13
  -2   1 -13    0.28    0.14
  -2   1 -13    0.08    0.09
  -2  -1 -13    0.26    0.11
  -2   1 -14    0.14    0.13
  -2   1 -14    0.22    0.10
  -2  -1 -14    0.10    0.09
  -2   1 -15   -0.02    0.08
  -2  -1 -15    0.00    0.08
  -2  -1 -16    1.31    0.12
   2   2 -16    0.42    0.08
   2  -2 -16    0.29    0.09
   2   2 -15    5.24    0.26
   2  -2 -15    5.20    0.27
   2   2 -14    2.47    0.21
   2  -2 -14    2.41    0.22
   2   2 -13    1.12    0.15
   2  -2 -13    1.21    0.16
   2   2 -12    8.01    0.37
   2  -2 -12    8.09    0.38
   2   2 -11   10.80    0.44
  -2   2  11   10.67    0.43
   2  -2 -11   11.15    0.45
   2  -2 -11   10.89    0.50
  -2  -2  11   10.61    0.44
  -2   2  10    4.70    0.24
  -2  -2  10    4.38    0.24
  -2   2   9    2.34    0.16
  -2  -2   9    2.11    0.16
  -2   2   8    4.22    0.19
   2  -2  -8    3.81    0.20
  -2  -2   8    4.13    0.20
  -2   2   7   31.04    1.10
  -2   2   7   33.78    1.03
   2   2  -7   33.32    1.13
  -2  -2   7   31.74    1.10
  -2  -2   7   32.56    1.04
   2  -2  -7   33.29    1.13
  -2   2   6    4.68    0.23
  -2   2   6    5.04    0.19
   2   2  -6    5.05    0.21
   2  -2  -6    4.95    0.21
  -2  -2   6    4.66    0.23
  -2  -2   6    5.11    0.21
  -2   2   5  148.04    4.39
   2   2  -5  142.45    4.81
  -2   2   5  146.53    4.50
   2  -2  -5  145.70    4.82
  -2  -2   5  142.36    4.40
  -2  -2   5  144.12    4.49
  -2   2   4    2.38    0.10
   2   2  -4    2.47    0.12
  -2   2   4    2.52    0.13
   2   2  -4    2.41    0.12
  -2   2   4    2.37    0.14
  -2  -2   4    2.61    0.14
   2  -2  -4    2.44    0.12
   2  -2  -4    2.34    0.12
  -2  -2   4    2.48    0.13
   2   2  -3    5.61    0.22
  -2   2   3    5.92    0.19
  -2   2   3    5.77    0.22
   2   2  -3    5.75    0.21
  -2   2   3    5.82    0.22
  -2  -2   3    5.98    0.22
   2  -2  -3    5.72    0.21
  -2  -2   3    5.64    0.22
   2  -2  -3    5.55    0.22
   2   2  -2  154.84    4.81
  -2   2   2  156.06    4.82
   2   2  -2  153.94    5.19
  -2   2   2  161.52    4.82
   2   2  -2  149.98    4.81
  -2  -2   2  165.86    4.81
   2  -2  -2  147.89    4.82
   2  -2  -2  159.50    5.19
   2  -2  -2  157.09    4.81
  -2  -2   2  157.61    4.82
  -2   2   1   18.89    0.58
  -2   2   1   17.30    0.59
   2   2  -1   18.34    0.79
   2   2  -1   17.63    0.62
   2  -2  -1   18.57    0.62
   2  -2  -1   16.66    0.57
  -2  -2   1   19.41    0.57
   2  -2  -1   19.08    0.57
  -2  -2   1   16.75    0.58
  -2   2   0   23.53    0.73
  -2   2   0   22.58    0.73
   2   2   0   21.42    0.98
  -2  -2   0   22.54    0.98
   2  -2   0   23.30    0.72
  -2  -2   0   25.43    0.72
  -2  -2   0   22.79    0.72
  -2   2  -1  187.97    5.97
   2   2   1  188.34    5.96
  -2   2  -1  201.05    5.96
   2   2   1  196.32    5.95
   2  -2   1  196.56    5.96
   2  -2   1  184.25    5.97
  -2  -2  -1  203.51    5.96
  -2  -2  -1  194.89    5.96
   2   2   2   41.21    1.29
   2   2   2   39.51    1.29
  -2   2  -2   41.03    1.30
  -2   2  -2   44.41    1.30
   2   2   2   40.83    1.27
   2  -2   2   41.07    1.26
  -2  -2  -2   41.28    1.30
   2  -2   2   41.34    1.29
  -2  -2  -2   42.16    1.30
   2  -2   2   40.79    1.30
   2   2   3   31.77    1.02
  -2   2  -3   33.13    1.02
   2   2   3   32.33    0.99
  -2   2  -3   30.73    1.02
   2  -2   3   30.98    0.99
  -2  -2  -3   32.15    1.02
  -2  -2  -3   33.12    1.02
   2  -2   3   31.12    1.02
   2   2   4    0.86    0.08
  -2   2  -4    0.96    0.09
   2   2   4    0.65    0.06
  -2   2  -4    0.90    0.09
   2  -2   4    1.06    0.08
  -2  -2  -4    0.70    0.08
   2  -2   4    0.79    0.08
  -2  -2  -4    0.70    0.08
   2   2   5   13.13    0.48
  -2   2  -5   13.21    0.48
   2   2   5   13.48    0.44
   2   2   5   12.94    0.46
   2  -2   5   13.25    0.48
   2  -2   5   13.09    0.44
  -2  -2  -5   13.08    0.48
  -2   2  -6    7.38    0.32
   2   2   6    7.66    0.30
   2   2   6    8.16    0.29
   2  -2   6    7.95    0.30
  -2  -2  -6    7.55    0.33
   2   2   7   21.19    0.73
   2   2   7   21.55    0.70
   2  -2   7   19.94    0.69
   2   2   8   27.52    0.89
   2  -2   8   26.56    0.89
   2   2   9    4.66    0.24
   2  -2   9    4.53    0.25
   2   2  10    0.13    0.09
  -2   2 -10    0.19    0.10
   2   2  10    0.29    0.10
   2  -2  10    0.24    0.10
  -2  -2 -10    0.23    0.10
   2   2  11   22.01    0.78
  -2   2 -11   22.24    0.77
  -2   2 -11   21.66    0.81
  -2   2 -11   22.03    0.79
  -2  -2 -11   22.27    0.79
  -2  -2 -11   22.03    0.79
   2  -2  11   21.41    0.78
  -2   2 -12    2.98    0.27
  -2   2 -12    3.13    0.21
  -2   2 -12    2.92    0.25
  -2  -2 -12    2.62    0.22
  -2   2 -13    0.62    0.16
  -2   2 -13    0.69    0.11
  -2   2 -13    0.58    0.14
  -2  -2 -13    0.55    0.12
  -2   2 -14    4.16    0.23
  -2   2 -14    4.03    0.28
  -2  -2 -14    4.29    0.25
  -2   2 -15    0.15    0.08
  -2  -2 -15    0.09    0.09
  -2  -2 -16    1.38    0.12
   2   3 -16    0.06    0.07
   2  -3 -16   -0.09    0.07
   2   3 -15    0.41    0.10
   2  -3 -15    0.45    0.12
   2   3 -14    0.49    0.11
   2  -3 -14    0.42    0.13
   2   3 -13    1.59    0.16
   2  -3 -13    1.57    0.17
   2   3 -12    0.85    0.13
   2  -3 -12    0.70    0.13
   2  -3 -12    1.00    0.14
   2   3 -11    5.29    0.28
   2   3 -11    5.72    0.33
  -2  -3  11    5.21    0.28
   2  -3 -11    5.17    0.29
   2  -3 -11    5.01    0.30
   2   3 -10   76.76    2.41
  -2   3  10   74.11    2.35
  -2  -3  10   75.11    2.37
  -2   3   9    3.89    0.20
  -2  -3   9    3.35    0.20
  -2   3   8   28.10    0.88
   2  -3  -8   26.37    0.96
  -2  -3   8   27.16    0.89
  -2   3   7   23.62    0.74
  -2   3   7   21.61    0.81
  -2  -3   7   23.70    0.76
   2  -3  -7   23.36    0.82
  -2  -3   7   22.75    0.81
  -2   3   6    2.30    0.16
  -2   3   6    2.56    0.12
  -2  -3   6    2.46    0.16
  -2  -3   6    2.41    0.14
   2  -3  -6    2.39    0.14
   2   3  -5    6.21    0.25
  -2   3   5    6.14    0.26
  -2   3   5    6.33    0.22
  -2  -3   5    6.24    0.24
   2  -3  -5    6.19    0.25
  -2  -3   5    6.41    0.26
   2   3  -4   56.43    1.92
  -2   3   4   56.11    1.80
  -2   3   4   57.11    1.74
  -2   3   4   57.34    1.80
   2   3  -4   56.92    1.79
  -2  -3   4   55.58    1.80
  -2  -3   4   58.21    1.80
   2  -3  -4   58.37    1.92
   2  -3  -4   57.42    1.79
   2   3  -3    8.07    0.29
  -2   3   3    8.01    0.29
  -2   3   3    7.95    0.29
   2   3  -3    7.90    0.29
  -2  -3   3    8.22    0.29
  -2  -3   3    7.96    0.29
   2  -3  -3    7.97    0.28
   2  -3  -3    8.12    0.30
  -2   3   2    0.21    0.05
   2   3  -2    0.15    0.04
   2   3  -2    0.14    0.06
  -2   3   2    0.08    0.06
   2  -3  -2    0.10    0.04
   2  -3  -2    0.18    0.07
  -2  -3   2    0.19    0.05
   2  -3  -2    0.18    0.04
  -2  -3   2    0.41    0.06
   2   3  -1  206.04    6.77
   2   3  -1  226.80    6.87
   2   3  -1  230.09    8.88
  -2   3   1  220.01    6.90
   2   3  -1  224.77    6.87
  -2   3   1  236.63    6.88
   2  -3  -1  224.15    7.41
   2  -3  -1  205.53    6.88
  -2  -3   1  223.44    6.89
   2  -3  -1  231.60    6.88
  -2  -3   1  235.86    6.88
  -2   3   0   55.06    1.75
  -2   3   0   56.30    1.74
   2   3   0   56.15    1.72
   2   3   0   58.39    1.73
   2   3   0   54.74    2.28
   2   3   0   53.28    1.73
  -2  -3   0   54.90    1.75
  -2  -3   0   54.76    2.29
  -2  -3   0   57.59    1.74
   2  -3   0   57.93    1.74
   2  -3   0   53.54    1.74
   2   3   1   22.28    0.69
  -2   3  -1   22.59    0.70
   2   3   1   20.51    0.71
   2   3   1   22.65    0.69
  -2   3  -1   21.25    0.72
  -2  -3  -1   23.08    0.70
  -2  -3  -1   22.87    0.71
   2  -3   1   21.40    0.70
   2  -3   1   20.89    0.72
   2  -3   1   20.47    0.76
   2   3   2   70.41    2.21
  -2   3  -2   67.46    2.22
  -2   3  -2   71.26    2.22
   2   3   2   72.47    2.17
  -2  -3  -2   71.38    2.22
   2  -3   2   69.59    2.21
   2  -3   2   71.94    2.17
   2  -3   2   72.92    2.23
  -2  -3  -2   74.12    2.22
   2   3   3   47.35    1.48
   2   3   3   47.62    1.44
  -2   3  -3   44.12    1.48
  -2   3  -3   47.71    1.48
   2  -3   3   47.01    1.49
  -2  -3  -3   46.35    1.48
  -2  -3  -3   48.38    1.49
   2  -3   3   46.66    1.44
  -2   3  -4    0.51    0.07
   2   3   4    0.74    0.08
  -2   3  -4    0.68    0.08
   2   3   4    0.69    0.07
   2   3   4    0.64    0.06
  -2  -3  -4    0.65    0.08
  -2  -3  -4    0.58    0.07
   2  -3   4    0.63    0.08
   2  -3   4    0.60    0.06
   2   3   5   21.53    0.67
   2   3   5   20.31    0.71
  -2   3  -5   20.41    0.71
   2  -3   5   20.16    0.67
  -2  -3  -5   20.92    0.71
  -2   3  -6   57.91    1.89
   2   3   6   61.20    1.83
   2   3   6   58.57    1.94
   2  -3   6   58.77    1.83
  -2  -3  -6   58.41    1.90
   2   3   7   11.09    0.42
   2   3   7   11.97    0.42
   2  -3   7   11.22    0.42
   2   3   8    1.89    0.16
   2  -3   8    1.75    0.15
   2   3   9    2.55    0.18
   2  -3   9    2.51    0.19
   2   3  10   19.16    0.67
  -2   3 -10   17.40    0.65
   2  -3  10   19.10    0.68
  -2  -3 -10   18.76    0.68
   2   3  11    0.42    0.11
  -2   3 -11    0.16    0.12
  -2   3 -11    0.32    0.12
  -2   3 -11    0.28    0.09
  -2  -3 -11    0.24    0.10
   2  -3  11    0.30    0.11
  -2   3 -12    0.90    0.17
  -2   3 -12    0.60    0.11
  -2   3 -12    0.88    0.15
  -2  -3 -12    0.66    0.12
  -2   3 -13    4.86    0.26
  -2   3 -13    4.86    0.30
  -2   3 -13    5.11    0.32
  -2  -3 -13    4.52    0.28
  -2   3 -14    0.41    0.10
  -2   3 -14    0.34    0.14
  -2  -3 -14    0.41    0.12
  -2   3 -15    3.21    0.21
  -2   3 -15    3.13    0.18
  -2  -3 -15    3.25    0.20
   2   4 -16    2.60    0.15
   2  -4 -16    2.52    0.16
   2   4 -15    0.13    0.09
   2  -4 -15    0.21    0.11
   2   4 -14    0.35    0.11
   2  -4 -14    0.30    0.12
   2   4 -13    5.05    0.28
   2  -4 -13    4.85    0.30
   2   4 -12   12.94    0.52
   2   4 -12   14.05    0.55
   2  -4 -12   13.05    0.59
   2  -4 -12   12.41    0.53
   2   4 -11   18.16    0.67
   2   4 -11   17.57    0.68
  -2  -4  11   16.73    0.65
   2  -4 -11   18.52    0.76
   2  -4 -11   18.15    0.68
   2   4 -10   19.27    0.71
  -2  -4  10   19.37    0.69
   2  -4 -10   19.65    0.81
  -2   4   9    1.34    0.12
  -2  -4   9    1.12    0.12
  -2   4   8    5.51    0.23
  -2  -4   8    5.69    0.25
   2  -4  -8    5.44    0.25
  -2   4   7   46.35    1.42
  -2  -4   7   43.02    1.50
   2  -4  -7   46.29    1.56
  -2  -4   7   46.33    1.44
  -2   4   6   41.58    1.42
  -2   4   6   43.64    1.34
  -2  -4   6   43.60    1.36
   2  -4  -6   43.61    1.48
  -2  -4   6   44.18    1.42
  -2   4   5    4.00    0.20
  -2   4   5    4.00    0.16
  -2  -4   5    3.89    0.18
   2  -4  -5    4.03    0.18
  -2  -4   5    4.20    0.20
  -2   4   4    2.98    0.12
  -2   4   4    3.04    0.17
   2   4  -4    3.09    0.15
  -2   4   4    3.13    0.16
  -2  -4   4    2.89    0.16
   2  -4  -4    3.54    0.15
   2  -4  -4    2.96    0.15
  -2  -4   4    3.21    0.16
  -2   4   3    3.70    0.17
   2   4  -3    3.66    0.16
   2  -4  -3    3.61    0.15
   2  -4  -3    3.54    0.16
  -2  -4   3    3.69    0.16
  -2  -4   3    3.51    0.16
   2   4  -2  623.92   19.60
   2   4  -2  653.00   25.20
  -2   4   2  653.14   19.60
  -2  -4   2  610.72   19.59
   2  -4  -2  646.44   21.19
   2  -4  -2  623.09   19.61
  -2  -4   2  663.92   19.63
  -2   4   1  200.55    5.79
   2   4  -1  186.17    5.77
   2   4  -1  182.89    5.69
   2   4  -1  181.71    5.79
   2   4  -1  191.46    7.48
  -2   4   1  192.27    5.81
   2  -4  -1  170.79    5.80
   2  -4  -1  191.04    5.78
  -2  -4   1  193.07    5.79
  -2  -4   1  189.09    5.80
   2   4   0  603.21   19.83
  -2   4   0  653.87   19.84
   2   4   0  666.64   19.57
  -2   4   0  635.85   19.84
   2   4   0  680.17   19.84
   2  -4   0  614.00   19.83
   2  -4   0  622.85   21.49
   2  -4   0  664.17   19.83
  -2  -4   0  668.46   19.85
  -2  -4   0  659.83   19.88
  -2  -4   0  645.75   25.51
   2   4   1   13.92    0.48
   2   4   1   14.46    0.46
  -2   4  -1   14.59    0.47
  -2   4  -1   13.71    0.49
   2   4   1   14.33    0.45
  -2  -4  -1   14.26    0.48
  -2  -4  -1   13.87    0.64
   2  -4   1   13.45    0.50
   2  -4   1   13.02    0.46
   2  -4   1   14.13    0.49
  -2  -4  -1   14.37    0.47
   2   4   2  100.06    2.97
   2   4   2   97.05    3.03
  -2   4  -2   98.37    3.03
  -2   4  -2   94.95    3.04
   2  -4   2   96.11    3.05
   2  -4   2   98.13    2.97
   2  -4   2   93.18    3.27
  -2  -4  -2  104.77    3.04
   2   4   3  132.43    3.92
   2   4   3  126.68    4.00
  -2   4  -3  122.88    4.01
  -2   4  -3  132.10    4.01
  -2  -4  -3  129.92    4.01
   2  -4   3  129.07    3.92
   2  -4   3  131.62    4.02
  -2  -4  -3  129.67    4.01
   2   4   4    1.94    0.11
   2   4   4    2.02    0.12
  -2   4  -4    2.23    0.14
   2   4   4    1.92    0.11
   2  -4   4    2.14    0.14
  -2  -4  -4    1.91    0.09
   2  -4   4    1.99    0.11
  -2  -4  -4    2.04    0.13
  -2  -4  -4    1.98    0.13
  -2   4  -5    0.09    0.06
   2   4   5    0.14    0.05
   2   4   5    0.13    0.05
   2  -4   5    0.12    0.05
  -2  -4  -5    0.16    0.06
   2   4   6   11.44    0.40
   2   4   6   11.42    0.42
   2  -4   6   11.09    0.40
  -2  -4  -6   11.28    0.44
   2   4   7   12.91    0.48
   2   4   7   12.87    0.45
   2  -4   7   12.61    0.46
   2   4   8   77.87    2.39
   2  -4   8   75.53    2.39
   2   4   9   29.94    0.99
   2  -4   9   29.76    1.00
   2   4  10   34.18    1.13
  -2   4 -10   34.74    1.12
  -2   4 -10   34.48    1.19
  -2  -4 -10   32.39    1.17
   2  -4  10   33.95    1.14
  -2   4 -11    0.83    0.12
  -2   4 -11    0.43    0.14
   2   4  11    0.86    0.13
  -2   4 -11    0.59    0.13
  -2  -4 -11    1.01    0.13
   2  -4  11    0.75    0.13
  -2   4 -12    0.17    0.12
  -2   4 -12    0.19    0.09
  -2   4 -12   -0.02    0.13
  -2  -4 -12    0.15    0.11
  -2   4 -13    0.94    0.13
  -2   4 -13    0.84    0.17
  -2   4 -13    0.64    0.15
  -2  -4 -13    0.93    0.15
  -2   4 -14    1.28    0.17
  -2   4 -14    1.37    0.13
  -2   4 -14    1.48    0.17
  -2  -4 -14    1.31    0.15
  -2   4 -15    0.28    0.10
  -2   4 -15    0.24    0.08
  -2  -4 -15    0.23    0.09
   2   5 -15    0.30    0.09
   2  -5 -15    0.08    0.10
   2   5 -14    1.15    0.14
   2  -5 -14    1.38    0.16
   2   5 -13    3.61    0.27
   2   5 -13    3.57    0.24
   2  -5 -13    3.55    0.26
   2  -5 -13    3.42    0.25
   2   5 -12    1.52    0.16
   2   5 -12    1.63    0.19
   2  -5 -12    1.32    0.17
   2  -5 -12    1.42    0.17
   2   5 -11    8.73    0.40
   2   5 -11    7.83    0.36
   2   5 -11    9.56    0.44
  -2  -5  11    8.06    0.37
   2  -5 -11    7.70    0.41
   2  -5 -11    8.08    0.39
   2   5 -10    4.54    0.30
   2   5 -10    4.00    0.23
   2   5 -10    4.44    0.27
   2  -5 -10    4.02    0.26
   2  -5 -10    4.17    0.25
  -2  -5  10    4.12    0.24
  -2  -5   9   29.92    1.00
  -2  -5   8    0.62    0.10
   2  -5  -8    0.79    0.09
  -2   5   7    0.66    0.08
  -2  -5   7    0.57    0.11
  -2  -5   7    0.70    0.10
   2  -5  -7    0.68    0.09
  -2   5   6    0.14    0.07
  -2   5   6    0.13    0.05
   2  -5  -6    0.13    0.06
  -2  -5   6    0.12    0.07
  -2  -5   6    0.12    0.06
  -2   5   5    0.29    0.07
  -2   5   5    0.34    0.05
  -2   5   5    0.29    0.06
  -2  -5   5    0.33    0.07
   2  -5  -5    0.32    0.06
  -2  -5   5    0.32    0.07
  -2   5   4    5.46    0.24
  -2   5   4    5.36    0.19
  -2  -5   4    5.07    0.23
  -2  -5   4    5.54    0.23
   2  -5  -4    5.46    0.22
   2  -5  -4    5.42    0.23
  -2   5   3   19.65    0.66
   2   5  -3   18.60    0.65
  -2   5   3   19.71    0.65
  -2  -5   3   19.55    0.65
   2  -5  -3   19.95    0.68
   2  -5  -3   19.68    0.65
  -2  -5   3   18.61    0.65
  -2   5   2    2.29    0.15
  -2   5   2    2.33    0.13
   2   5  -2    2.57    0.15
   2   5  -2    2.51    0.22
   2  -5  -2    2.39    0.12
  -2  -5   2    2.49    0.13
  -2  -5   2    2.24    0.13
   2  -5  -2    2.30    0.12
   2   5  -1  412.21   15.99
  -2   5   1  405.68   12.42
   2   5  -1  372.13   12.41
   2   5  -1  398.88   12.21
  -2   5   1  420.77   12.44
  -2  -5   1  407.59   12.43
  -2  -5   1  413.85   12.42
  -2   5   0  383.26   11.53
   2   5   0  375.83   11.32
   2   5   0  379.52   11.51
   2  -5   0  364.03   12.46
  -2  -5   0  367.94   14.83
  -2  -5   0  376.25   11.52
   2  -5   0  372.84   11.52
  -2  -5   0  378.07   11.53
   2   5   1  214.85    6.55
   2   5   1  209.35    6.44
  -2   5  -1  204.46    6.58
  -2   5  -1  218.73    6.56
  -2  -5  -1  211.29    6.57
   2  -5   1  198.06    7.09
  -2  -5  -1  215.56    8.47
   2  -5   1  217.64    6.58
  -2  -5  -1  227.10    6.56
   2   5   2    1.10    0.08
   2   5   2    0.96    0.08
  -2   5  -2    0.83    0.09
  -2   5  -2    0.95    0.09
  -2  -5  -2    1.03    0.09
   2  -5   2    0.93    0.10
   2  -5   2    1.00    0.07
   2  -5   2    1.04    0.09
   2   5   3    0.76    0.07
   2   5   3    0.78    0.08
  -2   5  -3    0.76    0.08
   2   5   3    0.82    0.08
  -2   5  -3    0.88    0.10
   2  -5   3    0.88    0.08
  -2  -5  -3    0.98    0.09
  -2  -5  -3    0.75    0.09
   2  -5   3    0.86    0.10
   2   5   4    9.65    0.37
  -2   5  -4   10.31    0.38
   2   5   4    9.31    0.36
   2   5   4   10.15    0.34
  -2  -5  -4    9.89    0.38
   2  -5   4    9.74    0.34
   2  -5   4   10.16    0.38
  -2  -5  -4    9.47    0.35
  -2  -5  -4   10.55    0.39
   2   5   5    2.64    0.15
  -2   5  -5    2.71    0.17
   2   5   5    2.88    0.14
   2  -5   5    2.77    0.15
   2  -5   5    2.56    0.13
  -2  -5  -5    2.57    0.17
   2   5   6    3.58    0.17
   2   5   6    3.37    0.18
   2  -5   6    3.48    0.18
   2   5   7    3.72    0.20
   2   5   7    3.91    0.19
   2  -5   7    4.02    0.21
   2   5   8   10.56    0.41
   2  -5   8   11.04    0.43
   2   5   9   14.05    0.51
   2  -5   9   13.54    0.53
  -2   5 -10   12.84    0.49
   2   5  10   12.84    0.50
  -2   5 -10   13.06    0.52
  -2   5 -10   12.46    0.49
   2  -5  10   12.87    0.52
  -2  -5 -10   12.83    0.50
   2   5  11   16.26    0.61
  -2   5 -11   16.39    0.61
  -2   5 -11   16.63    0.65
  -2   5 -11   16.80    0.61
  -2  -5 -11   15.85    0.62
   2  -5  11   15.82    0.63
  -2   5 -12    1.79    0.20
  -2   5 -12    1.51    0.15
  -2   5 -12    1.38    0.17
  -2  -5 -12    1.55    0.17
  -2   5 -13    3.35    0.22
  -2   5 -13    3.16    0.27
  -2   5 -13    3.46    0.26
  -2  -5 -13    3.27    0.26
  -2   5 -14    1.78    0.18
  -2   5 -14    1.79    0.18
  -2   5 -14    1.80    0.15
  -2  -5 -14    1.74    0.17
  -2   5 -15    1.10    0.13
  -2  -5 -15    1.07    0.12
   2   6 -15   11.09    0.42
   2  -6 -15   10.97    0.44
   2   6 -14    0.01    0.09
   2   6 -14    0.12    0.10
   2  -6 -14    0.12    0.11
   2   6 -13    7.21    0.36
   2   6 -13    6.76    0.33
   2  -6 -13    7.10    0.37
   2  -6 -13    6.99    0.36
   2   6 -12    6.46    0.37
   2   6 -12    6.73    0.33
   2   6 -12    6.41    0.35
   2  -6 -12    6.87    0.36
   2  -6 -12    6.10    0.35
   2   6 -11    4.81    0.28
   2   6 -11    3.63    0.24
   2   6 -11    4.33    0.30
  -2  -6  11    3.72    0.25
   2  -6 -11    3.78    0.27
   2  -6 -11    3.25    0.26
   2   6 -10    4.79    0.24
   2   6 -10    3.73    0.28
   2   6 -10    3.99    0.30
   2  -6 -10    4.92    0.28
   2  -6 -10    4.54    0.27
  -2  -6  10    4.61    0.26
  -2  -6   9    5.08    0.27
   2  -6  -8   22.60    0.84
  -2  -6   8   23.60    0.79
  -2  -6   7    1.36    0.13
   2  -6  -7    0.99    0.11
  -2   6   6    0.80    0.12
  -2   6   6    0.86    0.09
  -2  -6   6    1.16    0.11
   2  -6  -6    0.68    0.09
  -2  -6   6    0.79    0.11
  -2   6   5   86.03    2.73
  -2   6   5   83.67    2.81
  -2  -6   5   88.18    2.72
   2  -6  -5   86.15    2.89
  -2   6   4   38.42    1.36
  -2   6   4   41.15    1.34
  -2  -6   4   42.58    1.33
   2  -6  -4   41.62    1.40
   2   6  -3    4.67    0.22
  -2   6   3    4.53    0.21
  -2   6   3    4.65    0.21
  -2   6   3    4.88    0.23
   2   6  -3    4.78    0.32
  -2  -6   3    5.04    0.22
   2  -6  -3    5.04    0.21
   2  -6  -3    4.64    0.20
   2   6  -2  631.47   24.09
  -2   6   2  604.66   18.74
   2   6  -2  600.26   18.73
  -2   6   2  617.05   18.73
   2  -6  -2  615.46   18.72
  -2  -6   2  631.93   18.72
  -2  -6   2  569.90   18.73
   2   6  -1   72.51    2.19
   2   6  -1   68.59    2.24
   2   6  -1   74.95    2.93
  -2   6   1   69.08    2.25
  -2   6   1   72.38    2.26
  -2  -6   1   71.38    2.25
   2  -6  -1   70.95    2.41
  -2  -6   1   71.51    2.26
  -2   6   0   23.70    0.80
   2   6   0   23.63    0.76
   2   6   0   23.65    0.78
   2  -6   0   23.50    0.80
  -2  -6   0   23.71    0.80
   2  -6   0   23.67    0.83
  -2  -6   0   22.98    0.80
   2   6   1   44.13    1.41
  -2   6  -1   45.19    1.79
  -2   6  -1   45.53    1.43
  -2   6  -1   43.31    1.44
   2   6   1   44.59    1.38
   2  -6   1   43.70    1.51
   2  -6   1   44.36    1.43
  -2  -6  -1   44.30    1.43
  -2  -6  -1   44.26    1.42
  -2   6  -2  282.94    8.28
   2   6   2  273.56    8.12
   2   6   2  271.86    8.66
   2   6   2  264.93    8.27
  -2   6  -2  251.13    8.29
   2  -6   2  247.54    8.94
   2  -6   2  267.75    8.29
   2  -6   2  278.18    8.11
  -2  -6  -2  278.94    8.28
  -2   6  -3   24.28    0.79
   2   6   3   23.16    0.80
   2   6   3   23.90    0.74
   2   6   3   22.36    0.77
  -2  -6  -3   23.44    0.79
   2  -6   3   23.11    0.74
   2  -6   3   23.10    0.80
  -2  -6  -3   23.30    0.79
   2   6   4    1.57    0.10
   2   6   4    1.34    0.11
  -2   6  -4    1.79    0.14
   2  -6   4    1.69    0.12
  -2  -6  -4    1.47    0.13
  -2  -6  -4    1.52    0.10
   2  -6   4    1.70    0.15
  -2   6  -5   73.50    2.34
   2   6   5   72.07    2.41
   2   6   5   73.57    2.26
   2  -6   5   75.50    2.27
  -2  -6  -5   72.14    2.34
   2   6   6   13.43    0.50
   2   6   6   13.81    0.47
   2  -6   6   13.18    0.48
   2   6   7    2.97    0.18
   2   6   7    3.30    0.18
   2  -6   7    2.97    0.19
   2   6   8   82.34    2.74
   2   6   8   82.10    2.57
   2  -6   8   83.93    2.60
   2   6   9   11.91    0.45
  -2   6  -9   11.19    0.44
   2  -6   9   11.35    0.47
   2   6  10    0.09    0.09
  -2   6 -10    0.16    0.12
  -2   6 -10    0.13    0.10
   2  -6  10    0.06    0.10
  -2  -6 -10    0.17    0.10
   2   6  11   10.44    0.44
  -2   6 -11   10.16    0.42
  -2   6 -11   10.43    0.47
  -2   6 -11   10.64    0.44
   2  -6  11   10.37    0.47
  -2  -6 -11   10.34    0.45
  -2   6 -12    7.82    0.34
  -2   6 -12    6.94    0.38
  -2   6 -12    7.37    0.37
  -2  -6 -12    7.75    0.37
  -2   6 -13    0.08    0.09
  -2   6 -13    0.15    0.13
  -2   6 -13    0.15    0.14
  -2  -6 -13   -0.03    0.12
  -2   6 -14    1.94    0.18
  -2   6 -14    2.17    0.19
  -2  -6 -14    2.25    0.19
  -2   6 -15    0.04    0.09
  -2   6 -15    0.02    0.08
  -2  -6 -15    0.17    0.09
   2   7 -15    0.07    0.07
   2  -7 -15    0.10    0.08
   2   7 -14    0.08    0.10
   2   7 -14    0.07    0.09
   2  -7 -14    0.14    0.11
   2   7 -13    0.44    0.13
   2   7 -13    0.30    0.13
   2   7 -13    0.35    0.11
   2  -7 -13    0.30    0.13
   2  -7 -13    0.25    0.11
   2   7 -12    1.91    0.21
   2   7 -12    1.74    0.16
   2   7 -12    1.55    0.18
   2  -7 -12    1.71    0.18
   2  -7 -12    1.72    0.18
   2   7 -11   12.13    0.50
   2   7 -11   10.49    0.45
   2   7 -11   11.54    0.47
  -2  -7  11   10.64    0.46
   2  -7 -11   10.35    0.48
   2  -7 -11   10.56    0.52
   2   7 -10   24.43    0.86
   2   7 -10   24.52    0.87
   2   7 -10   24.71    0.91
  -2  -7  10   25.00    0.87
   2  -7 -10   24.09    1.01
   2  -7 -10   23.62    0.89
   2   7  -9   68.80    2.27
  -2  -7   9   73.41    2.26
  -2  -7   8    3.10    0.21
   2  -7  -8    2.98    0.19
  -2  -7   7   11.10    0.42
   2  -7  -7   10.34    0.43
  -2   7   6   24.56    0.87
  -2  -7   6   25.96    0.84
   2  -7  -6   26.02    0.90
  -2  -7   6   23.93    0.88
  -2   7   5   26.25    0.94
  -2   7   5   27.16    0.95
   2  -7  -5   28.62    0.97
   2   7  -4   50.88    2.05
  -2   7   4   45.02    1.59
  -2   7   4   46.71    1.57
  -2  -7   4   47.33    1.55
   2  -7  -4   49.78    1.64
   2   7  -3   60.95    2.48
  -2   7   3   57.48    1.91
  -2   7   3   58.70    1.96
  -2   7   3   57.13    1.90
  -2  -7   3   59.79    1.89
   2  -7  -3   58.95    1.89
   2  -7  -3   61.81    2.01
  -2   7   2  145.00    4.63
  -2   7   2  150.11    4.83
  -2   7   2  149.43    4.64
   2   7  -2  148.87    4.63
   2   7  -2  155.68    5.99
   2  -7  -2  151.96    4.62
  -2  -7   2  152.49    4.63
  -2  -7   2  136.82    4.63
   2   7  -1  250.54    7.46
  -2   7   1  231.98    7.96
   2   7  -1  243.97    7.61
   2   7  -1  253.15    9.81
  -2   7   1  237.57    7.62
  -2   7   1  252.24    7.63
  -2  -7   1  250.96    7.62
  -2  -7   1  247.71    7.62
   2  -7  -1  250.21    8.21
   2   7   0   48.99    1.49
   2   7   0   46.08    1.53
  -2   7   0   46.34    1.55
  -2   7   0   49.55    1.55
  -2   7   0   46.10    1.58
  -2  -7   0   48.14    1.55
   2  -7   0   47.44    1.54
  -2  -7   0   49.42    1.55
   2  -7   0   48.69    1.63
  -2   7  -1  155.01    4.98
   2   7   1  162.57    5.18
  -2   7  -1  164.32    6.33
   2   7   1  164.24    4.85
  -2   7  -1  159.90    4.97
  -2   7  -1  153.49    5.17
   2   7   1  157.54    4.95
   2  -7   1  154.95    4.84
   2  -7   1  161.53    5.34
   2  -7   1  162.73    4.97
  -2  -7  -1  162.74    4.97
  -2  -7  -1  158.22    4.96
  -2   7  -2    0.21    0.08
  -2   7  -2    0.19    0.07
  -2   7  -2    0.20    0.06
   2   7   2    0.21    0.06
   2   7   2    0.32    0.07
   2   7   2    0.23    0.06
  -2  -7  -2    0.17    0.06
   2  -7   2    0.17    0.06
   2  -7   2    0.20    0.08
   2  -7   2    0.30    0.06
   2   7   3   18.83    0.60
  -2   7  -3   18.49    0.65
  -2   7  -3   17.84    0.63
   2   7   3   18.40    0.65
   2  -7   3   18.29    0.61
   2  -7   3   18.26    0.66
  -2  -7  -3   19.09    0.66
  -2  -7  -3   18.68    0.66
   2   7   4   27.93    0.89
   2   7   4   27.96    0.96
  -2   7  -4   28.73    0.95
   2  -7   4   27.27    0.90
  -2  -7  -4   27.50    0.95
   2   7   5    1.14    0.11
   2   7   5    1.26    0.10
  -2  -7  -5    1.52    0.15
   2  -7   5    1.48    0.13
   2   7   6   22.30    0.80
   2   7   6   22.60    0.74
   2  -7   6   23.07    0.77
   2   7   7   25.10    0.83
   2   7   7   24.34    0.88
   2  -7   7   25.56    0.85
   2   7   8    4.28    0.23
   2   7   8    4.44    0.24
   2  -7   8    4.55    0.26
  -2   7  -9    6.49    0.33
   2   7   9    7.50    0.32
  -2   7  -9    6.71    0.31
   2  -7   9    6.93    0.34
  -2   7 -10    0.75    0.13
   2   7  10    1.00    0.13
  -2   7 -10    0.70    0.15
  -2  -7 -10    1.00    0.14
   2  -7  10    0.82    0.15
  -2   7 -11    7.07    0.35
  -2   7 -11    6.61    0.36
  -2  -7 -11    7.10    0.35
  -2   7 -12    0.15    0.14
  -2   7 -12    0.09    0.13
  -2  -7 -12    0.11    0.11
  -2   7 -13    1.25    0.17
  -2   7 -13    1.46    0.18
  -2  -7 -13    1.12    0.15
  -2   7 -14    0.22    0.11
  -2   7 -14    0.19    0.12
  -2  -7 -14    0.45    0.11
  -2   7 -15    1.00    0.11
  -2   7 -15    0.92    0.11
  -2  -7 -15    1.03    0.11
   2   8 -15    0.07    0.07
   2  -8 -15    0.14    0.08
   2   8 -14    2.18    0.17
   2   8 -14    2.00    0.16
   2  -8 -14    1.85    0.18
   2  -8 -14    2.10    0.18
   2   8 -13    2.93    0.23
   2   8 -13    2.83    0.21
   2   8 -13    3.06    0.23
   2  -8 -13    2.90    0.24
   2  -8 -13    2.90    0.24
   2   8 -12    0.87    0.16
   2   8 -12    0.65    0.14
   2   8 -12    0.90    0.13
   2  -8 -12    0.89    0.15
   2  -8 -12    1.04    0.15
   2   8 -11   25.91    0.97
   2   8 -11   26.15    0.92
   2   8 -11   26.53    0.94
   2  -8 -11   26.54    1.09
   2  -8 -11   25.72    0.96
   2   8 -10    8.38    0.38
   2   8 -10    9.41    0.40
   2   8 -10    9.75    0.43
  -2  -8  10    9.53    0.41
   2  -8 -10    8.57    0.44
   2  -8 -10    7.71    0.40
   2   8  -9    1.19    0.15
   2   8  -9    1.16    0.17
  -2  -8   9    1.41    0.16
   2  -8  -9    1.10    0.12
   2  -8  -9    1.50    0.17
  -2  -8   8    0.20    0.09
  -2  -8   7   26.95    0.92
   2  -8  -7   27.35    0.98
  -2   8   6    0.28    0.08
  -2  -8   6    0.48    0.09
   2  -8  -6    0.41    0.08
  -2  -8   6    0.28    0.09
   2   8  -5    2.87    0.28
  -2   8   5    2.22    0.19
  -2   8   5    2.37    0.16
  -2  -8   5    2.62    0.18
   2  -8  -5    2.53    0.16
  -2   8   4   43.65    1.50
  -2   8   4   41.74    1.48
   2   8  -4   47.14    1.94
   2  -8  -4   46.30    1.54
  -2  -8   4   44.88    1.47
  -2   8   3   56.41    1.92
  -2   8   3   58.86    1.96
   2   8  -3   61.44    2.49
  -2  -8   3   59.03    1.91
   2  -8  -3   60.80    2.02
   2   8  -2    1.34    0.19
  -2   8   2    0.97    0.12
  -2   8   2    1.31    0.12
  -2  -8   2    1.26    0.13
   2  -8  -2    1.19    0.13
   2   8  -1  485.86   18.21
   2   8  -1  469.48   13.89
  -2   8   1  433.91   14.17
  -2   8   1  472.55   14.17
   2   8  -1  457.29   14.15
  -2   8   1  451.69   14.82
  -2  -8   1  446.68   14.16
   2  -8  -1  457.80   15.29
  -2  -8   1  464.55   14.17
   2   8   0    0.15    0.08
  -2   8   0    0.26    0.09
  -2   8   0    0.21    0.08
  -2   8   0    0.31    0.09
   2   8   0    0.21    0.06
   2   8   0    0.18    0.07
   2  -8   0    0.20    0.06
  -2  -8   0    0.18    0.07
  -2  -8   0    0.22    0.08
   2   8   1    8.33    0.35
  -2   8  -1    8.64    0.34
  -2   8  -1    9.12    0.37
   2   8   1    8.82    0.32
  -2   8  -1    9.53    0.41
   2   8   1    8.57    0.35
   2  -8   1    8.07    0.30
   2  -8   1    8.90    0.36
  -2  -8  -1    8.51    0.36
  -2  -8  -1    8.60    0.36
   2  -8   1    8.90    0.34
  -2   8  -2   28.96    0.96
  -2   8  -2   29.80    1.19
   2   8   2   28.32    0.89
  -2   8  -2   28.07    0.95
   2   8   2   27.85    0.97
   2  -8   2   27.63    0.96
   2  -8   2   28.53    0.98
   2  -8   2   25.69    0.89
  -2   8  -3    5.77    0.24
   2   8   3    5.97    0.23
   2   8   3    5.87    0.26
  -2   8  -3    6.27    0.28
  -2  -8  -3    5.82    0.28
   2  -8   3    5.37    0.23
  -2   8  -4    7.63    0.34
   2   8   4    7.86    0.28
  -2   8  -4    7.66    0.30
   2   8   4    7.84    0.32
  -2  -8  -4    7.49    0.34
   2  -8   4    7.05    0.30
   2   8   5   17.11    0.62
   2   8   5   16.93    0.57
   2  -8   5   16.83    0.59
   2   8   6    0.66    0.09
   2   8   6    0.55    0.10
   2  -8   6    0.82    0.11
   2   8   7   18.28    0.67
   2   8   7   18.29    0.62
   2  -8   7   17.78    0.65
   2   8   8    0.41    0.09
   2   8   8    0.33    0.10
   2  -8   8    0.48    0.11
   2   8   9   26.15    0.87
  -2   8  -9   26.75    0.93
  -2   8  -9   26.34    0.88
   2  -8   9   25.48    0.91
  -2  -8  -9   24.25    0.92
  -2  -8  -9   24.90    1.04
  -2   8 -10    1.41    0.16
   2   8  10    1.12    0.14
  -2   8 -10    1.39    0.18
   2  -8  10    1.13    0.17
  -2  -8 -10    1.36    0.15
  -2   8 -11    2.59    0.22
  -2   8 -11    2.14    0.22
  -2  -8 -11    2.94    0.23
  -2   8 -12    1.12    0.16
  -2   8 -12    1.05    0.18
  -2  -8 -12    1.29    0.16
  -2   8 -13    0.08    0.12
  -2   8 -13   -0.04    0.12
  -2  -8 -13    0.09    0.12
  -2   8 -14   -0.05    0.10
  -2   8 -14    0.03    0.10
  -2  -8 -14    0.11    0.10
  -2   8 -15    2.06    0.15
  -2  -8 -15    2.00    0.15
   2  -9 -15    0.62    0.08
   2   9 -14    1.92    0.17
   2   9 -14    1.59    0.15
   2   9 -14    1.50    0.13
   2  -9 -14    1.91    0.17
   2  -9 -14    1.65    0.17
   2   9 -13    0.55    0.13
   2   9 -13    0.49    0.11
   2   9 -13    0.48    0.12
   2  -9 -13    0.36    0.12
   2  -9 -13    0.53    0.12
   2   9 -12    6.24    0.34
   2   9 -12    6.34    0.31
   2   9 -12    6.05    0.33
   2  -9 -12    6.54    0.33
   2  -9 -12    6.61    0.38
   2   9 -11    0.17    0.12
   2   9 -11    0.16    0.09
   2   9 -11    0.13    0.12
   2  -9 -11    0.12    0.12
   2  -9 -11    0.27    0.12
   2   9 -10   16.91    0.63
   2   9 -10   17.28    0.63
   2   9 -10   16.51    0.66
   2  -9 -10   15.79    0.65
   2  -9 -10   16.99    0.74
  -2  -9  10   16.02    0.64
   2   9  -9    4.22    0.27
   2   9  -9    4.51    0.27
   2   9  -9    4.61    0.29
   2  -9  -9    4.29    0.22
   2  -9  -9    3.78    0.28
  -2  -9   9    4.12    0.26
  -2  -9   8    5.02    0.27
  -2   9   7    8.86    0.39
  -2  -9   7    9.51    0.39
   2  -9  -7    9.57    0.40
  -2   9   6    4.44    0.25
   2  -9  -6    4.90    0.25
  -2  -9   6    4.78    0.24
   2   9  -5    1.16    0.22
  -2   9   5    1.06    0.12
   2   9  -5    0.99    0.12
  -2  -9   5    1.10    0.14
   2  -9  -5    1.11    0.12
   2   9  -4   20.30    1.00
  -2   9   4   20.72    0.74
  -2  -9   4   20.85    0.75
   2  -9  -4   21.08    0.76
   2   9  -3   43.32    1.86
  -2   9   3   40.68    1.43
  -2   9   3   42.86    1.44
  -2  -9   3   42.58    1.42
   2  -9  -3   44.54    1.49
  -2   9   2    8.22    0.34
  -2   9   2    8.55    0.37
   2   9  -2    7.65    0.34
   2   9  -2    9.24    0.51
  -2  -9   2    9.37    0.38
   2  -9  -2    8.22    0.34
   2   9  -1    1.23    0.10
  -2   9   1    1.06    0.13
   2   9  -1    1.31    0.13
   2   9  -1    1.33    0.20
  -2   9   1    1.39    0.13
   2  -9  -1    1.43    0.11
  -2  -9   1    1.00    0.12
   2   9   0  267.13    9.89
  -2   9   0  314.70    9.47
   2   9   0  315.50    9.26
  -2   9   0  300.11    9.89
  -2  -9   0  311.91    9.47
   2  -9   0  314.44   10.19
   2  -9   0  318.99    9.49
  -2   9  -1    0.64    0.12
   2   9   1    0.11    0.07
  -2   9  -1    0.43    0.08
   2   9   1    0.45    0.07
  -2  -9  -1    0.26    0.09
   2  -9   1    0.19    0.06
  -2   9  -2   69.36    2.73
   2   9   2   63.49    2.23
  -2   9  -2   66.43    2.22
  -2   9  -2   66.84    2.17
   2   9   2   69.82    2.08
   2   9   3   43.05    1.45
   2   9   3   44.08    1.34
  -2   9  -3   43.48    1.43
  -2   9  -3   45.01    1.79
  -2   9  -3   43.35    1.42
   2  -9   3   37.86    1.34
  -2  -9  -3   41.45    1.42
  -2   9  -4   13.19    0.49
   2   9   4   13.49    0.46
   2   9   4   13.69    0.52
  -2  -9  -4   13.59    0.53
   2  -9   4   12.17    0.47
   2   9   5    0.35    0.07
   2   9   5    0.18    0.08
   2  -9   5    0.20    0.08
   2   9   6    8.51    0.33
   2   9   6    8.88    0.38
   2  -9   6    8.08    0.36
   2   9   7    2.49    0.19
   2   9   7    2.30    0.17
   2  -9   7    1.99    0.18
   2   9   8    7.18    0.33
   2   9   8    8.01    0.36
   2  -9   8    7.35    0.36
  -2   9  -9    1.85    0.17
  -2   9  -9    1.97    0.20
  -2  -9  -9    1.66    0.18
  -2  -9  -9    1.62    0.16
   2  -9   9    1.73    0.19
  -2   9 -10   34.50    1.13
   2   9  10   33.23    1.21
  -2   9 -10   32.93    1.19
  -2  -9 -10   34.44    1.34
  -2  -9 -10   32.68    1.17
   2  -9  10   31.82    1.16
  -2   9 -11    0.79    0.17
   2   9  11    0.62    0.13
  -2   9 -11    0.73    0.14
  -2  -9 -11    0.54    0.13
  -2   9 -12    0.20    0.14
  -2   9 -12    0.15    0.13
  -2  -9 -12    0.26    0.12
  -2   9 -13    2.39    0.21
  -2   9 -13    2.43    0.20
  -2  -9 -13    2.38    0.20
  -2   9 -14    1.27    0.14
  -2   9 -14    1.15    0.14
  -2  -9 -14    1.24    0.13
  -2  -9 -15    0.48    0.08
   2  10 -14    2.80    0.17
   2  10 -14    2.39    0.18
   2  10 -14    2.59    0.18
   2 -10 -14    2.80    0.18
   2 -10 -14    2.80    0.20
   2  10 -13    6.28    0.30
   2  10 -13    6.19    0.31
   2  10 -13    6.13    0.29
   2 -10 -13    6.15    0.30
   2 -10 -13    6.08    0.35
   2  10 -12    1.05    0.13
   2  10 -12    1.02    0.16
   2  10 -12    1.01    0.15
   2 -10 -12    0.98    0.16
   2 -10 -12    1.12    0.14
   2  10 -11   23.22    0.82
   2  10 -11   21.68    0.85
   2  10 -11   22.99    0.83
   2 -10 -11   23.28    0.85
   2 -10 -11   23.27    0.98
   2  10 -10    0.60    0.14
   2  10 -10    0.30    0.12
   2  10 -10    0.59    0.11
   2 -10 -10    0.29    0.13
  -2 -10  10    0.48    0.13
   2 -10 -10    0.28    0.11
   2  10  -9    7.18    0.31
   2  10  -9    6.22    0.35
   2  10  -9    6.72    0.34
   2  10  -9    6.89    0.37
   2 -10  -9    6.29    0.28
   2 -10  -9    7.03    0.39
  -2 -10   9    6.40    0.34
   2  10  -8   17.50    0.66
   2  10  -8   18.68    0.71
  -2 -10   8   17.66    0.66
  -2  10   7   11.43    0.48
   2 -10  -7   11.61    0.49
  -2 -10   7   11.99    0.47
  -2  10   6    0.41    0.10
   2  10  -6    0.46    0.10
   2 -10  -6    0.44    0.10
  -2 -10   6    0.27    0.09
   2  10  -5   15.23    0.57
  -2  10   5   14.62    0.56
  -2 -10   5   15.11    0.63
   2 -10  -5   14.72    0.58
   2  10  -4   14.27    0.55
   2  10  -4   14.13    0.76
  -2  10   4   15.03    0.54
  -2 -10   4   13.45    0.57
   2 -10  -4   14.35    0.56
  -2  10   3   46.73    1.63
   2  10  -3   48.76    2.12
   2  10  -3   49.58    1.67
  -2  10   3   48.52    1.64
  -2 -10   3   50.88    1.64
   2 -10  -3   49.25    1.71
   2  10  -2   34.83    1.15
   2  10  -2   32.72    1.49
  -2  10   2   33.65    1.14
  -2  10   2   32.63    1.14
   2 -10  -2   33.64    1.17
   2  10  -1  294.32    8.71
  -2  10   1  283.62    9.29
  -2  10   1  287.24    8.91
   2  10  -1  290.73    9.31
   2 -10  -1  285.65    9.58
  -2 -10   1  284.02    8.92
  -2  10   0    6.32    0.29
   2  10   0    6.67    0.25
   2  10   0    6.16    0.29
  -2  10   0    6.77    0.32
  -2 -10   0    6.81    0.31
   2 -10   0    6.19    0.26
  -2  10  -1    4.08    0.24
   2  10   1    3.63    0.21
   2  10   1    3.66    0.18
  -2  10  -1    3.50    0.20
  -2 -10  -1    3.10    0.21
   2 -10   1    3.65    0.17
  -2  10  -2   89.97    3.02
   2  10   2   87.82    3.04
   2  10   2   96.66    2.83
  -2  10  -2   92.76    2.94
   2  10   3    4.16    0.24
  -2  10  -3    3.93    0.21
   2  10   3    4.25    0.19
   2 -10   3    4.22    0.20
  -2 -10  -3    3.87    0.25
   2  10   4    4.73    0.21
   2  10   4    4.78    0.24
   2  10   4    5.03    0.27
  -2  10  -4    4.80    0.24
   2 -10   4    5.00    0.24
   2  10   5   51.02    1.59
   2  10   5   52.90    1.74
   2 -10   5   48.30    1.62
   2  10   6    4.52    0.27
   2  10   6    4.67    0.22
   2 -10   6    4.71    0.25
   2  10   7   27.52    0.98
   2 -10   7   25.99    0.92
  -2  10  -8    4.86    0.27
   2  10   8    5.05    0.29
  -2  10  -8    4.61    0.28
  -2  10  -8    4.99    0.30
   2 -10   8    4.45    0.28
   2  10   9   23.40    0.88
  -2  10  -9   24.20    0.87
  -2  10  -9   23.61    0.82
  -2 -10  -9   23.02    0.97
   2 -10   9   22.99    0.85
  -2 -10  -9   22.21    0.84
   2  10  10    3.17    0.25
  -2  10 -10    3.69    0.26
  -2  10 -10    3.26    0.28
   2 -10  10    2.93    0.26
  -2 -10 -10    3.24    0.27
  -2 -10 -10    3.25    0.23
   2  10  11    2.86    0.24
  -2  10 -11    3.29    0.27
  -2  10 -11    3.16    0.27
  -2 -10 -11    2.89    0.25
  -2 -10 -11    2.51    0.22
  -2  10 -12    6.00    0.32
  -2  10 -12    5.72    0.33
  -2 -10 -12    5.93    0.31
  -2  10 -13    0.63    0.13
  -2  10 -13    0.68    0.14
  -2 -10 -13    0.53    0.12
  -2  10 -14    0.22    0.10
  -2  10 -14    0.14    0.09
  -2 -10 -14    0.32    0.09
   2  11 -14    0.89    0.11
   2  11 -14    0.99    0.11
   2 -11 -14    1.22    0.11
   2 -11 -14    1.16    0.13
   2  11 -13    1.26    0.15
   2  11 -13    1.33    0.13
   2  11 -13    1.15    0.14
   2 -11 -13    1.59    0.14
   2 -11 -13    1.57    0.17
   2  11 -12    0.22    0.11
   2  11 -12    0.10    0.11
   2  11 -12    0.14    0.09
   2 -11 -12    0.15    0.13
   2 -11 -12    0.16    0.10
   2  11 -11    6.00    0.31
   2  11 -11    6.54    0.34
   2  11 -11    6.57    0.33
   2 -11 -11    5.67    0.31
   2 -11 -11    6.45    0.39
   2  11 -10    5.26    0.32
   2  11 -10    5.75    0.33
   2  11 -10    4.92    0.30
   2  11 -10    5.29    0.28
   2 -11 -10    5.51    0.36
   2  11  -9  105.63    3.49
   2  11  -9  101.98    3.48
   2  11  -9  105.55    3.32
   2  11  -9  113.26    3.68
   2 -11  -9  102.41    4.04
  -2 -11   9  103.55    3.30
   2  11  -8    2.28    0.21
   2  11  -8    2.01    0.20
   2  11  -8    2.11    0.19
  -2 -11   8    2.10    0.19
   2 -11  -8    1.85    0.15
   2 -11  -8    2.09    0.22
  -2  11   7    2.80    0.21
   2 -11  -7    3.20    0.22
  -2 -11   7    2.88    0.21
   2  11  -6   18.68    0.69
  -2  11   6   17.72    0.69
  -2 -11   6   18.21    0.65
   2 -11  -6   17.95    0.71
  -2  11   5    4.01    0.23
   2  11  -5    4.26    0.23
   2 -11  -5    3.92    0.25
   2  11  -4   12.12    0.70
   2  11  -4   12.15    0.48
  -2  11   4   11.68    0.47
  -2 -11   4   11.53    0.52
   2 -11  -4   12.49    0.51
   2  11  -3   97.38    3.18
   2  11  -3   94.81    3.97
  -2  11   3   96.11    3.14
   2 -11  -3   95.88    3.26
   2 -11  -3   98.14    3.24
  -2 -11   3   91.60    3.08
   2  11  -2    4.98    0.37
   2  11  -2    4.83    0.25
  -2  11   2    4.84    0.23
   2  11  -2    5.34    0.24
  -2 -11   2    4.80    0.28
   2 -11  -2    4.70    0.23
   2  11  -1  205.41    6.76
   2  11  -1  220.56    6.71
  -2  11   1  203.73    6.69
  -2  11   1  200.15    6.43
   2 -11  -1  204.30    6.89
  -2 -11   1  204.29    6.44
  -2  11   0   38.20    1.34
  -2  11   0   36.39    1.30
   2  11   0   37.29    1.33
  -2  11   0   37.82    1.31
   2  11   0   41.44    1.33
   2  11   0   39.93    1.22
   2 -11   0   38.27    1.33
  -2 -11   0   39.41    1.31
   2  11   1  197.45    5.78
  -2  11  -1  190.16    6.17
   2  11   1  179.61    6.23
   2  11   1  196.56    6.19
  -2  11  -1  182.33    6.23
  -2 -11  -1  191.37    5.94
   2 -11   1  192.89    6.35
  -2  11  -2   54.29    1.85
   2  11   2   56.61    1.70
   2  11   2   56.48    1.85
   2  11   2   50.71    1.85
  -2  11  -2   53.70    1.82
  -2  11  -3    3.59    0.22
   2  11   3    3.54    0.22
   2  11   3    3.62    0.24
   2  11   3    4.01    0.19
   2  11   4   22.50    0.83
  -2  11  -4   21.98    0.80
   2  11   4   21.36    0.81
   2  11   4   22.52    0.74
   2 -11   4   23.77    0.76
   2  11   5    7.20    0.37
   2  11   5    7.41    0.31
   2 -11   5    8.28    0.33
   2  11   6    0.88    0.14
   2 -11   6    0.87    0.12
  -2  11  -7   41.23    1.46
   2  11   7   41.58    1.46
   2 -11   7   41.19    1.37
  -2  11  -8    1.66    0.19
  -2  11  -8    1.41    0.16
  -2  11  -8    1.42    0.17
   2  11   8    1.53    0.18
   2 -11   8    1.46    0.17
  -2 -11  -8    1.22    0.17
   2  11   9    8.58    0.40
  -2  11  -9    7.57    0.40
  -2  11  -9    7.36    0.37
  -2 -11  -9    8.21    0.43
   2 -11   9    7.64    0.38
  -2 -11  -9    8.42    0.37
  -2  11 -10    2.36    0.21
   2  11  10    2.16    0.20
  -2  11 -10    2.07    0.22
  -2 -11 -10    2.64    0.21
  -2 -11 -10    2.39    0.24
  -2  11 -11    6.76    0.37
   2  11  11    7.03    0.36
  -2  11 -11    6.90    0.36
  -2 -11 -11    6.47    0.38
  -2 -11 -11    6.96    0.33
   2  11  12    2.19    0.19
  -2  11 -12    1.91    0.20
  -2  11 -12    2.09    0.19
  -2 -11 -12    2.32    0.20
  -2  11 -13    0.73    0.13
  -2  11 -13    0.87    0.13
  -2 -11 -13    0.88    0.12
  -2  11 -14    0.16    0.09
  -2  11 -14    0.30    0.09
  -2 -11 -14    0.23    0.08
   2  12 -14    0.60    0.08
   2  12 -14    0.40    0.08
   2 -12 -14    0.65    0.10
   2  12 -13    0.00    0.09
   2  12 -13    0.19    0.09
   2 -12 -13   -0.01    0.11
   2  12 -12   11.40    0.47
   2  12 -12   11.75    0.46
   2 -12 -12   11.47    0.56
   2  12 -11   11.20    0.48
   2  12 -11   11.07    0.46
   2 -12 -11   10.35    0.54
   2  12 -10    1.69    0.18
   2  12 -10    2.21    0.21
   2  12 -10    2.19    0.19
   2 -12 -10    1.45    0.20
   2  12  -9    1.05    0.15
   2  12  -9    1.19    0.17
   2  12  -9    1.23    0.17
  -2 -12   9    1.15    0.15
   2 -12  -9    0.99    0.18
   2  12  -8   10.45    0.48
   2  12  -8    9.70    0.42
   2  12  -8    9.77    0.44
   2 -12  -8    9.73    0.36
  -2 -12   8    9.68    0.42
   2 -12  -8    9.08    0.50
  -2  12   7    8.54    0.40
   2  12  -7    8.68    0.38
   2  12  -7    8.94    0.40
   2  12  -7    9.40    0.44
   2 -12  -7    8.45    0.41
  -2 -12   7    8.80    0.38
   2  12  -6    0.51    0.10
  -2  12   6    0.45    0.11
  -2 -12   6    0.54    0.11
   2 -12  -6    0.60    0.12
  -2  12   5   19.62    0.73
   2  12  -5   19.47    0.73
   2 -12  -5   19.43    0.77
  -2 -12   5   19.90    0.68
   2  12  -4    2.38    0.18
  -2  12   4    2.79    0.18
   2 -12  -4    2.38    0.20
   2 -12  -4    2.45    0.18
  -2  12   3   21.06    0.75
   2  12  -3   20.81    1.03
   2  12  -3   20.68    0.76
   2 -12  -3   21.10    0.77
   2 -12  -3   20.79    0.80
  -2  12   2   52.48    1.88
   2  12  -2   60.06    1.88
  -2  12   2   56.67    1.87
   2  12  -2   56.51    1.90
  -2 -12   2   54.38    1.87
  -2  12   1   20.46    0.72
   2  12  -1   19.58    0.74
  -2  12   1   19.09    0.72
   2  12  -1   21.86    0.73
  -2 -12   1   19.64    0.75
  -2  12   0    0.97    0.11
   2  12   0    1.11    0.10
   2  12   0    1.12    0.12
   2  12   0    1.04    0.12
  -2  12   0    0.94    0.11
  -2 -12   0    1.19    0.14
  -2  12  -1   15.19    0.57
   2  12   1   14.81    0.51
   2  12   1   16.17    0.58
  -2  12  -1   14.63    0.56
   2  12   1   14.40    0.58
  -2 -12  -1   14.40    0.59
   2  12   2  203.08    6.92
  -2  12  -2  212.83    6.92
  -2  12  -2  206.55    6.85
   2  12   2  212.93    6.42
   2  12   2  219.99    6.88
   2  12   3    3.45    0.18
  -2  12  -3    3.71    0.24
   2  12   3    3.74    0.24
   2  12   3    3.21    0.22
  -2  12  -3    3.26    0.20
  -2  12  -4    7.93    0.35
   2  12   4    7.57    0.36
  -2  12  -4    8.18    0.38
   2  12   4    8.14    0.38
  -2  12  -5   13.16    0.54
   2  12   5   11.80    0.53
   2 -12   5   13.23    0.48
   2  12   6    2.59    0.24
  -2  12  -6    3.24    0.25
   2 -12   6    3.14    0.21
  -2  12  -7    0.32    0.12
  -2  12  -7    0.17    0.12
   2  12   7    0.23    0.11
  -2  12  -7    0.10    0.10
   2 -12   7    0.08    0.09
  -2 -12  -7    0.05    0.11
   2  12   8   30.87    1.13
  -2  12  -8   31.60    1.12
  -2  12  -8   29.53    1.04
  -2  12  -8   31.78    1.11
   2 -12   8   31.42    1.06
  -2 -12  -8   29.34    1.25
  -2  12  -9    1.27    0.18
  -2  12  -9    1.52    0.18
   2  12   9    1.50    0.19
  -2 -12  -9    1.49    0.16
   2 -12   9    1.64    0.18
  -2 -12  -9    0.95    0.17
  -2  12 -10    0.29    0.14
   2  12  10    0.21    0.12
  -2  12 -10    0.11    0.12
  -2 -12 -10    0.16    0.13
  -2 -12 -10    0.24    0.10
  -2  12 -11    0.22    0.13
   2  12  11    0.27    0.12
  -2  12 -11    0.21    0.14
  -2 -12 -11    0.34    0.11
  -2 -12 -11    0.32    0.13
  -2  12 -12   10.82    0.46
   2  12  12   10.47    0.46
  -2  12 -12   11.11    0.44
  -2 -12 -12   10.80    0.44
  -2 -12 -12   10.79    0.51
  -2  12 -13    1.19    0.13
  -2  12 -13    1.18    0.14
  -2 -12 -13    1.15    0.12
  -2  12 -14    1.95    0.15
  -2  12 -14    2.09    0.15
  -2 -12 -14    2.11    0.13
   2  13 -14    3.48    0.17
   2  13 -14    3.29    0.17
   2  13 -13    0.66    0.11
   2  13 -13    0.71    0.10
   2 -13 -13    0.81    0.13
   2  13 -12   15.74    0.57
   2  13 -12   15.19    0.59
   2 -13 -12   15.85    0.70
   2  13 -11    4.15    0.26
   2  13 -11    3.94    0.26
   2 -13 -11    3.52    0.30
   2  13 -10    0.30    0.12
   2  13 -10    0.36    0.13
   2  13 -10    0.36    0.12
   2 -13 -10    0.19    0.14
  -2 -13  10    0.21    0.11
   2  13  -9   12.86    0.54
   2  13  -9   12.04    0.49
   2  13  -9   11.64    0.51
  -2 -13   9   11.57    0.49
   2 -13  -9   11.83    0.59
  -2  13   8   15.28    0.66
   2  13  -8   18.30    0.68
   2  13  -8   17.19    0.64
   2  13  -8   17.40    0.61
   2 -13  -8   13.93    0.72
  -2 -13   8   15.20    0.60
   2 -13  -8   15.85    0.53
   2  13  -7    8.41    0.38
   2  13  -7    7.56    0.35
   2  13  -7    7.55    0.37
   2  13  -7    7.79    0.40
  -2  13   7    8.40    0.39
   2 -13  -7    7.68    0.43
   2 -13  -7    7.30    0.30
  -2 -13   7    8.35    0.36
   2 -13  -7    7.84    0.40
  -2  13   6   63.69    2.07
   2  13  -6   59.31    2.07
  -2 -13   6   61.18    1.93
   2 -13  -6   58.80    2.14
  -2  13   5   13.97    0.54
   2  13  -5   13.31    0.54
  -2 -13   5   13.70    0.50
   2 -13  -5   13.20    0.58
  -2  13   4   34.22    1.17
   2  13  -4   32.87    1.18
   2 -13  -4   33.71    1.23
  -2  13   3    5.98    0.27
   2  13  -3    5.25    0.27
   2 -13  -3    5.80    0.31
   2  13  -2   46.90    1.49
  -2  13   2   44.07    1.48
   2  13  -2   42.64    1.51
  -2  13   2   41.59    1.49
  -2  13   1   61.55    2.06
  -2  13   1   59.36    2.08
   2  13  -1   65.81    2.07
   2  13  -1   60.96    2.09
  -2  13   0   13.76    0.52
   2  13   0   13.03    0.53
   2  13   0   14.65    0.53
   2  13   0   13.77    0.48
  -2  13   0   13.19    0.52
  -2  13  -1  127.92    4.16
   2  13   1  122.78    4.21
  -2  13  -1  126.06    4.20
   2  13   1  127.99    3.89
   2  13   1  131.44    4.18
   2  13   2   20.06    0.78
  -2  13  -2   20.18    0.75
  -2  13  -2   20.78    0.77
   2  13   2   22.35    0.78
  -2  13  -3   27.10    0.97
   2  13   3   26.56    1.00
  -2  13  -3   28.15    1.01
   2  13   3   29.48    1.01
   2  13   4   99.07    3.14
  -2  13  -4   92.17    3.12
  -2  13  -4   96.54    3.15
   2  13   4   87.71    3.14
   2  13   5    1.62    0.18
  -2  13  -5    1.57    0.17
   2  13   6    1.92    0.21
  -2  13  -6    1.76    0.19
  -2  13  -7    5.89    0.35
   2  13   7    6.81    0.37
  -2  13  -7    6.99    0.35
  -2  13  -7    6.78    0.32
  -2 -13  -7    6.08    0.36
  -2  13  -8    6.66    0.35
  -2  13  -8    5.97    0.32
   2  13   8    6.36    0.37
  -2  13  -8    6.21    0.34
  -2 -13  -8    6.39    0.37
   2 -13   8    5.92    0.32
  -2  13  -9    1.33    0.17
   2  13   9    1.61    0.20
  -2  13  -9    0.80    0.17
  -2 -13  -9    1.51    0.15
  -2 -13  -9    1.48    0.19
   2  13  10   21.69    0.86
  -2  13 -10   22.27    0.83
  -2  13 -10   22.27    0.79
  -2 -13 -10   22.10    0.94
  -2 -13 -10   21.46    0.79
  -2  13 -11   10.00    0.42
   2  13  11    9.51    0.44
  -2  13 -11    9.88    0.44
  -2 -13 -11    9.08    0.47
  -2 -13 -11    9.87    0.40
  -2  13 -12    2.42    0.22
   2  13  12    2.34    0.21
  -2  13 -12    2.55    0.21
  -2 -13 -12    2.87    0.18
  -2 -13 -12    2.51    0.22
  -2  13 -13    0.11    0.10
  -2  13 -13    0.07    0.09
  -2 -13 -13    0.18    0.08
  -2  13 -14    1.96    0.14
  -2  13 -14    1.97    0.13
   2  14 -13    1.21    0.11
   2  14 -13    1.38    0.13
   2 -14 -13    1.35    0.14
   2  14 -12    3.34    0.21
   2  14 -12    3.04    0.22
   2 -14 -12    3.53    0.26
   2  14 -11   10.23    0.42
   2  14 -11    9.78    0.44
   2 -14 -11   10.55    0.52
   2  14 -10    2.62    0.23
   2  14 -10    2.20    0.19
   2  14 -10    2.42    0.22
   2 -14 -10    2.42    0.24
  -2 -14  10    2.35    0.21
   2  14  -9    1.25    0.16
   2  14  -9    1.29    0.17
   2  14  -9    1.18    0.15
   2 -14  -9    1.28    0.19
  -2 -14   9    0.89    0.14
   2  14  -8    3.74    0.26
  -2  14   8    2.99    0.25
   2  14  -8    3.67    0.24
   2  14  -8    3.76    0.28
   2 -14  -8    2.70    0.27
   2 -14  -8    3.26    0.18
  -2 -14   8    3.25    0.22
   2  14  -7   17.88    0.69
  -2  14   7   18.47    0.71
   2  14  -7   18.17    0.70
   2  14  -7   17.87    0.65
   2  14  -7   19.28    0.73
  -2 -14   7   18.05    0.65
   2 -14  -7   16.81    0.73
   2 -14  -7   17.39    0.58
   2 -14  -7   18.02    0.80
   2  14  -6   41.94    1.51
   2  14  -6   43.50    1.42
   2  14  -6   46.81    1.58
  -2  14   6   44.46    1.51
   2  14  -6   44.86    1.50
   2 -14  -6   40.85    1.73
  -2 -14   6   42.91    1.40
   2 -14  -6   42.07    1.57
   2  14  -5    0.52    0.11
  -2  14   5    0.38    0.10
  -2 -14   5    0.60    0.10
   2 -14  -5    0.55    0.13
   2  14  -4  142.51    4.79
  -2  14   4  145.47    4.75
   2 -14  -4  146.95    4.91
   2  14  -3   32.81    1.17
  -2  14   3   32.98    1.15
   2 -14  -3   33.34    1.21
   2  14  -2   87.95    2.83
  -2  14   2   87.25    2.84
  -2  14   2   82.32    2.85
   2  14  -2   85.54    2.87
   2  14  -1  140.16    4.75
  -2  14   1  147.16    4.70
   2  14  -1  149.54    4.70
  -2  14   1  138.75    4.73
  -2  14   0   60.78    2.03
  -2  14   0   60.45    2.05
   2  14   0   58.96    2.06
   2  14   0   62.89    2.04
   2  14   1    1.82    0.17
   2  14   1    1.96    0.17
  -2  14  -1    1.67    0.15
  -2  14  -1    1.81    0.16
  -2  14  -2    0.29    0.10
   2  14   2    0.22    0.09
  -2  14  -2    0.30    0.08
   2  14   2    0.47    0.11
   2  14   3    8.97    0.41
  -2  14  -3    9.51    0.42
   2  14   3    9.22    0.42
  -2  14  -3    9.47    0.39
   2  14   4   13.23    0.56
   2  14   4   14.53    0.58
  -2  14  -4   13.91    0.57
  -2  14  -5    3.29    0.25
   2  14   5    3.48    0.26
  -2  14  -6   13.53    0.55
  -2  14  -6   12.08    0.52
   2  14   6   13.84    0.57
  -2  14  -6   12.43    0.49
  -2 -14  -6   12.92    0.58
   2 -14   6   11.77    0.51
  -2  14  -7   10.13    0.44
  -2  14  -7    8.46    0.39
   2  14   7    9.88    0.46
  -2  14  -7    8.48    0.41
  -2 -14  -7    9.79    0.46
   2 -14   7    7.95    0.39
  -2  14  -8   12.13    0.49
   2  14   8   12.02    0.55
  -2  14  -8   11.90    0.52
  -2  14  -8   12.17    0.52
  -2 -14  -8   12.00    0.58
  -2 -14  -8   12.05    0.47
  -2  14  -9   20.91    0.79
  -2  14  -9   20.93    0.75
   2  14   9   20.10    0.82
  -2 -14  -9   21.56    0.90
  -2 -14  -9   20.29    0.75
  -2  14 -10   11.34    0.48
   2  14  10   11.16    0.50
  -2  14 -10   10.66    0.45
  -2 -14 -10   10.67    0.43
  -2 -14 -10   10.57    0.53
  -2  14 -11    0.20    0.13
   2  14  11    0.24    0.11
  -2  14 -11    0.26    0.12
  -2 -14 -11    0.27    0.09
  -2 -14 -11    0.15    0.12
   2  14  12    2.65    0.21
  -2  14 -12    3.34    0.21
  -2  14 -12    2.88    0.21
  -2 -14 -12    2.65    0.22
  -2 -14 -12    2.66    0.17
  -2  14 -13    0.76    0.11
  -2  14 -13    0.68    0.10
  -2 -14 -13    0.66    0.08
   2  15 -13    0.96    0.10
   2  15 -13    1.02    0.11
   2 -15 -13    1.20    0.12
   2  15 -12    0.20    0.09
   2  15 -12    0.16    0.10
   2 -15 -12    0.43    0.12
   2  15 -11    0.11    0.11
   2  15 -11    0.19    0.10
   2 -15 -11    0.31    0.13
   2  15 -10   26.37    0.93
   2  15 -10   25.36    0.88
   2 -15 -10   25.20    1.07
  -2 -15  10   24.90    0.94
   2  15  -9   13.75    0.56
   2  15  -9   13.17    0.54
   2  15  -9   13.01    0.52
   2 -15  -9   12.84    0.63
  -2 -15   9   12.81    0.55
   2  15  -8    7.50    0.36
  -2  15   8    7.41    0.38
   2  15  -8    7.40    0.35
   2  15  -8    7.62    0.38
  -2 -15   8    6.61    0.36
   2 -15  -8    7.42    0.41
  -2 -15   8    6.61    0.35
  -2  15   7    1.94    0.20
   2  15  -7    2.10    0.19
   2  15  -7    2.09    0.18
   2  15  -7    1.99    0.19
   2  15  -7    1.83    0.18
   2 -15  -7    1.98    0.14
   2 -15  -7    1.74    0.19
  -2 -15   7    1.96    0.17
   2 -15  -7    1.64    0.19
  -2 -15   7    1.98    0.18
   2  15  -6    0.58    0.12
   2  15  -6    0.71    0.11
   2  15  -6    0.50    0.12
   2  15  -6    0.63    0.13
  -2  15   6    0.59    0.13
   2 -15  -6    0.80    0.15
  -2 -15   6    0.58    0.12
   2 -15  -6    0.60    0.14
  -2 -15   6    0.64    0.11
   2  15  -5    3.40    0.21
   2  15  -5    3.59    0.25
   2  15  -5    3.08    0.21
  -2  15   5    3.45    0.24
   2  15  -5    3.29    0.23
  -2 -15   5    3.63    0.20
  -2 -15   5    3.19    0.23
   2 -15  -5    3.48    0.26
   2 -15  -5    3.26    0.24
   2  15  -4   22.87    0.85
  -2  15   4   22.60    0.84
   2 -15  -4   23.24    0.89
   2  15  -3   48.61    1.72
   2 -15  -3   51.54    1.78
   2  15  -2    0.24    0.09
  -2  15   2    0.27    0.09
  -2  15   2    0.19    0.08
   2  15  -1   12.01    0.46
   2  15  -1   11.16    0.47
  -2  15   1   11.06    0.45
  -2  15   1   10.99    0.45
  -2  15   0   97.24    3.16
  -2  15   0   93.16    3.18
   2  15   0   94.33    3.20
   2  15   0   97.89    3.16
  -2  15  -1   56.12    1.88
   2  15   1   56.78    1.89
   2  15   1   54.01    1.91
  -2  15  -1   56.35    1.90
  -2  15  -2   21.59    0.81
   2  15   2   22.41    0.81
   2  15   2   20.84    0.81
  -2  15  -2   21.83    0.78
  -2  15  -3    8.39    0.38
   2  15   3    8.45    0.39
   2  15   3    7.73    0.38
  -2  15  -3    8.20    0.35
   2  15   4   10.30    0.47
   2  15   4   11.49    0.49
  -2  15  -4   11.03    0.48
   2  15   5    3.12    0.25
  -2  15  -5    2.64    0.22
  -2  15  -5    3.39    0.25
   2 -15   5    2.57    0.20
   2  15   6   10.36    0.49
  -2  15  -6   10.37    0.44
  -2  15  -6   10.67    0.47
  -2  15  -6    9.64    0.41
   2 -15   6   10.06    0.44
  -2 -15  -6   10.15    0.49
  -2  15  -7   40.36    1.35
  -2  15  -7   42.39    1.46
  -2  15  -7   41.28    1.43
   2  15   7   41.67    1.48
  -2 -15  -7   41.87    1.64
   2 -15   7   38.91    1.47
  -2  15  -8    1.02    0.15
  -2  15  -8    0.88    0.16
   2  15   8    1.26    0.19
  -2  15  -8    1.35    0.17
  -2 -15  -8    1.33    0.18
  -2 -15  -8    1.39    0.13
  -2  15  -9    1.85    0.18
   2  15   9    1.82    0.20
  -2  15  -9    1.89    0.19
  -2  15  -9    1.58    0.18
  -2 -15  -9    1.84    0.17
  -2 -15  -9    1.75    0.20
  -2  15 -10   10.86    0.48
   2  15  10   11.60    0.50
  -2  15 -10   11.13    0.45
  -2 -15 -10   11.94    0.55
  -2 -15 -10   11.13    0.44
  -2  15 -11    0.20    0.10
   2  15  11    0.22    0.11
  -2  15 -11    0.10    0.11
  -2 -15 -11    0.28    0.08
  -2 -15 -11    0.12    0.11
  -2  15 -12    1.99    0.18
   2  15  12    2.19    0.18
  -2  15 -12    2.29    0.19
  -2 -15 -12    2.01    0.14
  -2 -15 -12    2.20    0.19
  -2  15 -13    0.38    0.08
  -2  15 -13    0.32    0.09
   2  16 -13    3.94    0.19
   2  16 -13    3.68    0.17
   2 -16 -13    4.18    0.21
   2  16 -12    0.64    0.10
   2  16 -12    0.82    0.11
   2 -16 -12    0.66    0.12
   2  16 -11    2.99    0.20
   2  16 -11    3.00    0.21
   2 -16 -11    3.25    0.24
   2  16 -10    0.24    0.12
   2  16 -10    0.08    0.10
  -2 -16  10    0.13    0.09
   2 -16 -10    0.23    0.13
   2  16  -9    0.16    0.11
   2  16  -9    0.25    0.12
  -2 -16   9    0.08    0.10
   2 -16  -9    0.19    0.13
  -2  16   8    8.37    0.41
   2  16  -8    8.03    0.39
   2  16  -8    8.84    0.40
   2  16  -8    8.07    0.37
  -2 -16   8    7.98    0.39
   2 -16  -8    8.15    0.44
  -2  16   7    3.08    0.24
   2  16  -7    2.75    0.23
   2  16  -7    2.43    0.23
   2  16  -7    2.80    0.22
   2  16  -7    2.91    0.23
   2 -16  -7    2.80    0.25
  -2 -16   7    2.55    0.19
   2 -16  -7    3.14    0.17
  -2 -16   7    2.82    0.23
   2  16  -6    9.35    0.38
   2  16  -6    9.38    0.41
   2  16  -6    9.65    0.42
   2  16  -6    9.04    0.41
  -2  16   6    8.97    0.42
   2 -16  -6    8.25    0.44
  -2 -16   6    9.27    0.41
   2 -16  -6    8.47    0.45
  -2 -16   6    8.61    0.37
   2  16  -5    0.61    0.11
   2  16  -5    0.61    0.12
   2  16  -5    0.49    0.12
  -2  16   5    0.64    0.12
   2  16  -5    0.55    0.11
  -2 -16   5    0.58    0.12
   2 -16  -5    0.61    0.13
  -2 -16   5    0.63    0.10
   2 -16  -5    0.44    0.12
  -2  16   4   26.49    0.94
   2  16  -4   27.58    0.98
   2  16  -4   26.14    0.95
   2  16  -4   25.22    0.87
   2  16  -4   26.27    0.93
   2 -16  -4   24.55    0.97
   2 -16  -4   26.61    1.00
  -2 -16   4   25.40    0.97
   2 -16  -4   25.67    1.06
  -2  16   3    7.02    0.33
   2  16  -3    7.09    0.34
  -2 -16   3    6.84    0.33
   2 -16  -3    7.38    0.37
  -2  16   2   28.33    1.01
  -2  16   2   27.39    1.01
   2  16  -2   29.29    1.03
  -2  16   1    9.86    0.41
   2  16  -1    9.40    0.42
  -2  16   1    9.60    0.41
   2  16  -1    9.32    0.40
  -2  16   0    0.22    0.09
  -2  16   0    0.16    0.08
   2  16   0    0.21    0.08
   2  16   0    0.21    0.09
  -2  16  -1    3.36    0.21
  -2  16  -1    3.47    0.23
   2  16   1    3.23    0.21
   2  16   1    3.12    0.22
  -2  16  -2   39.25    1.38
  -2  16  -2   41.24    1.41
   2  16   2   39.88    1.40
   2  16   2   40.94    1.43
   2  16   3   20.21    0.77
   2  16   3   19.98    0.78
  -2  16  -3   21.18    0.78
  -2  16  -3   20.05    0.74
   2 -16   3   19.48    0.76
  -2  16  -4   26.28    0.94
   2  16   4   26.20    0.95
   2  16   4   24.81    0.94
   2 -16   4   23.71    0.93
  -2  16  -5   22.50    0.85
  -2  16  -5   25.21    0.90
   2  16   5   24.66    0.91
   2 -16   5   22.67    0.89
  -2  16  -6   16.13    0.57
   2  16   6   15.94    0.66
  -2  16  -6   15.65    0.64
  -2  16  -6   15.36    0.60
  -2 -16  -6   14.63    0.68
   2 -16   6   15.47    0.62
  -2  16  -7    6.78    0.36
  -2  16  -7    6.28    0.31
  -2  16  -7    6.79    0.34
   2  16   7    6.84    0.38
   2 -16   7    6.54    0.33
  -2 -16  -7    6.88    0.38
  -2  16  -8    2.20    0.19
  -2  16  -8    2.59    0.23
   2  16   8    2.80    0.25
  -2  16  -8    2.52    0.23
  -2 -16  -8    2.71    0.25
   2 -16   8    2.41    0.20
  -2  16  -9    0.28    0.11
  -2  16  -9    0.43    0.12
  -2  16  -9    0.45    0.13
  -2 -16  -9    0.52    0.13
   2  16  10    4.91    0.29
  -2  16 -10    4.48    0.28
  -2  16 -10    4.71    0.26
  -2 -16 -10    4.62    0.23
  -2 -16 -10    5.47    0.31
  -2  16 -11    5.95    0.28
  -2  16 -11    5.82    0.29
   2  16  11    6.02    0.30
  -2 -16 -11    5.86    0.26
  -2 -16 -11    6.45    0.33
  -2  16 -12    4.47    0.23
  -2  16 -12    4.91    0.22
   2  16  12    4.93    0.24
  -2 -16 -12    4.92    0.26
  -2  16 -13    3.88    0.19
   2  17 -12   14.06    0.51
   2  17 -12   14.38    0.49
   2 -17 -12   14.12    0.59
   2  17 -11    3.00    0.20
   2  17 -11    3.00    0.18
   2 -17 -11    3.14    0.23
   2  17 -10   17.54    0.63
   2  17 -10   17.66    0.66
   2 -17 -10   18.29    0.77
  -2 -17  10   17.95    0.68
   2  17  -9    5.56    0.30
   2  17  -9    5.20    0.28
   2 -17  -9    6.38    0.35
  -2 -17   9    5.65    0.30
  -2  17   8   22.69    0.87
   2  17  -8   23.21    0.81
   2  17  -8   23.57    0.85
  -2 -17   8   23.87    0.88
   2 -17  -8   22.69    0.97
   2  17  -7    6.47    0.31
   2  17  -7    6.91    0.34
  -2  17   7    6.06    0.34
   2  17  -7    5.86    0.33
  -2 -17   7    7.03    0.34
   2 -17  -7    5.73    0.36
   2  17  -6   53.71    1.80
   2  17  -6   52.25    1.71
   2  17  -6   53.82    1.84
  -2  17   6   53.97    1.83
   2 -17  -6   52.84    2.08
  -2 -17   6   53.01    1.89
   2 -17  -6   52.24    1.90
   2  17  -5    1.25    0.16
  -2  17   5    1.43    0.17
   2  17  -5    1.12    0.13
   2  17  -5    1.38    0.16
   2 -17  -5    1.07    0.15
   2 -17  -5    1.30    0.16
  -2 -17   5    0.92    0.13
   2  17  -4    2.55    0.20
   2  17  -4    3.05    0.23
  -2  17   4    2.88    0.22
   2  17  -4    2.66    0.19
   2 -17  -4    2.59    0.21
  -2 -17   4    2.49    0.21
   2 -17  -4    2.79    0.22
   2 -17  -4    2.79    0.23
   2  17  -3   27.26    1.00
   2  17  -3   26.89    0.96
   2  17  -3   26.83    0.91
   2 -17  -3   26.70    1.01
  -2 -17   3   27.23    1.00
   2 -17  -3   28.29    1.03
   2 -17  -3   26.39    1.09
   2  17  -2    6.44    0.32
  -2  17   2    5.85    0.30
  -2  17   2    6.25    0.31
  -2 -17   2    5.55    0.29
   2 -17  -2    5.81    0.30
   2  17  -1    5.52    0.30
  -2  17   1    5.64    0.29
  -2  17   1    5.24    0.28
   2  17  -1    5.35    0.27
  -2 -17   1    5.66    0.28
   2 -17  -1    5.54    0.28
  -2  17   0    9.37    0.40
  -2  17   0    9.36    0.41
   2  17   0    9.22    0.42
   2  17   0    8.79    0.39
   2 -17   0    9.06    0.40
  -2 -17   0    8.91    0.39
  -2  17  -1   12.61    0.51
   2  17   1   13.03    0.53
  -2  17  -1   12.65    0.52
   2  17   1   12.50    0.51
  -2 -17  -1   12.81    0.52
   2 -17   1   12.49    0.52
   2  17   2   92.55    3.17
   2  17   2   94.90    3.20
  -2  17  -2  100.52    3.20
  -2  17  -2   94.71    3.15
   2 -17   2   93.91    3.30
  -2  17  -3   31.77    1.13
   2  17   3   32.09    1.13
   2  17   3   31.79    1.14
  -2  17  -3   30.17    1.09
   2 -17   3   31.18    1.15
  -2  17  -4   50.17    1.69
   2  17   4   49.79    1.70
   2  17   4   48.26    1.69
   2 -17   4   47.42    1.72
  -2 -17  -4   46.79    1.71
   2  17   5    9.34    0.45
  -2  17  -5    9.14    0.44
  -2 -17  -5    8.98    0.45
   2 -17   5    9.82    0.42
  -2  17  -6    1.11    0.15
  -2  17  -6    0.74    0.14
   2  17   6    0.91    0.15
  -2 -17  -6    0.87    0.14
   2 -17   6    0.84    0.12
  -2  17  -7    4.59    0.30
   2  17   7    5.14    0.32
  -2  17  -7    4.75    0.29
  -2  17  -7    4.49    0.26
   2 -17   7    4.74    0.27
  -2 -17  -7    4.78    0.30
  -2  17  -8    1.51    0.15
  -2  17  -8    1.25    0.16
  -2  17  -8    1.14    0.16
   2  17   8    1.16    0.17
   2 -17   8    1.44    0.14
  -2 -17  -8    1.42    0.18
  -2  17  -9    4.71    0.28
  -2  17  -9    4.62    0.28
  -2  17  -9    4.48    0.26
  -2 -17  -9    5.51    0.31
   2  17  10    1.35    0.15
  -2  17 -10    1.19    0.15
  -2  17 -10    1.43    0.14
  -2 -17 -10    1.47    0.16
   2  17  11    7.17    0.33
  -2  17 -11    7.11    0.30
  -2  17 -11    7.50    0.32
  -2 -17 -11    7.20    0.35
  -2  17 -12   19.63    0.66
   2  17  12   19.86    0.72
  -2  17 -12   20.41    0.70
  -2 -17 -12   20.55    0.80
   2  18 -12   10.14    0.38
   2  18 -12    9.98    0.36
   2 -18 -12   10.92    0.44
   2  18 -11    2.25    0.16
   2  18 -11    2.31    0.17
  -2  18  11    2.59    0.17
   2 -18 -11    2.75    0.20
   2  18 -10    5.08    0.27
   2  18 -10    5.82    0.26
   2 -18 -10    6.73    0.33
  -2 -18  10    5.47    0.27
   2  18  -9   -0.01    0.10
   2  18  -9    0.13    0.09
   2 -18  -9    0.20    0.11
  -2 -18   9    0.13    0.09
   2  18  -8    1.04    0.13
   2  18  -8    1.12    0.15
  -2 -18   8    0.90    0.13
   2 -18  -8    0.80    0.15
   2  18  -7    0.99    0.15
   2  18  -7    0.97    0.14
   2  18  -7    0.97    0.13
  -2  18   7    1.20    0.15
  -2 -18   7    1.13    0.14
   2 -18  -7    1.33    0.16
   2  18  -6    0.25    0.10
   2  18  -6    0.05    0.10
   2  18  -6    0.26    0.11
  -2  18   6    0.26    0.11
  -2 -18   6    0.12    0.10
   2 -18  -6    0.16    0.10
   2  18  -5   28.26    0.95
   2  18  -5   29.04    1.05
   2  18  -5   28.75    1.01
  -2  18   5   27.88    1.03
  -2 -18   5   29.01    1.06
   2 -18  -5   27.56    1.15
   2  18  -4    9.15    0.40
  -2  18   4    9.05    0.41
   2  18  -4    8.87    0.37
   2  18  -4    9.42    0.43
   2 -18  -4    8.81    0.43
   2 -18  -4    8.32    0.43
   2 -18  -4    8.84    0.41
  -2 -18   4    9.21    0.41
   2  18  -3    1.23    0.16
   2  18  -3    1.22    0.14
  -2  18   3    1.02    0.14
   2 -18  -3    1.01    0.13
   2 -18  -3    0.87    0.14
  -2 -18   3    1.01    0.13
   2 -18  -3    1.12    0.14
   2  18  -2   62.18    2.09
  -2  18   2   59.95    2.07
  -2  18   2   62.30    2.06
   2 -18  -2   58.39    2.13
   2 -18  -2   60.24    2.14
  -2 -18   2   61.83    2.14
   2  18  -1   17.93    0.70
  -2  18   1   19.40    0.71
   2  18  -1   19.48    0.74
  -2  18   1   18.88    0.72
  -2 -18   1   18.67    0.72
   2 -18  -1   18.39    0.72
  -2  18   0   42.47    1.48
   2  18   0   42.43    1.49
  -2  18   0   43.74    1.47
   2  18   0   40.54    1.46
   2 -18   0   43.01    1.52
  -2 -18   0   42.09    1.51
  -2  18  -1    0.81    0.13
   2  18   1    0.77    0.13
  -2  18  -1    0.70    0.13
   2  18   1    0.78    0.12
  -2 -18  -1    0.87    0.12
   2 -18   1    0.71    0.12
  -2  18  -2   16.53    0.65
   2  18   2   15.93    0.65
  -2  18  -2   16.47    0.62
   2  18   2   16.40    0.64
   2 -18   2   16.00    0.64
   2  18   3    0.31    0.11
  -2  18  -3    0.38    0.12
   2  18   3    0.31    0.11
   2 -18   3    0.48    0.11
   2  18   4    0.92    0.15
   2  18   4    1.14    0.15
  -2  18  -4    0.92    0.15
   2 -18   4    1.01    0.13
   2  18   5   24.02    0.92
  -2  18  -5   25.40    0.92
  -2 -18  -5   23.64    0.99
   2 -18   5   23.65    0.91
   2  18   6    5.55    0.32
  -2  18  -6    5.26    0.29
  -2  18  -6    5.44    0.32
   2 -18   6    4.91    0.28
  -2 -18  -6    5.29    0.31
   2  18   7    0.16    0.10
  -2  18  -7    0.30    0.11
  -2  18  -7    0.45    0.10
  -2  18  -7    0.31    0.12
   2 -18   7    0.32    0.10
  -2 -18  -7    0.39    0.12
  -2  18  -8   44.11    1.43
  -2  18  -8   45.04    1.51
  -2  18  -8   43.34    1.53
  -2 -18  -8   45.82    1.74
   2 -18   8   42.53    1.56
  -2  18  -9    2.91    0.21
  -2  18  -9    2.67    0.19
  -2 -18  -9    3.04    0.23
  -2  18 -10    9.34    0.39
  -2  18 -10    9.85    0.37
   2  18  10    9.87    0.41
  -2 -18 -10    9.23    0.44
   2  18  11    2.74    0.18
  -2  18 -11    2.38    0.17
  -2  18 -11    2.37    0.15
  -2 -18 -11    2.48    0.18
  -2  18 -12    0.23    0.07
   2  19 -11    0.29    0.08
  -2  19  11    0.26    0.07
   2  19 -11    0.33    0.07
   2 -19 -11    0.35    0.09
   2  19 -10    9.31    0.37
   2  19 -10    8.93    0.35
   2 -19 -10    9.50    0.42
  -2 -19  10    9.00    0.37
   2  19  -9    1.59    0.16
   2  19  -9    1.63    0.14
  -2 -19   9    1.73    0.15
   2 -19  -9    1.93    0.19
   2  19  -8    0.39    0.11
   2  19  -8    0.31    0.10
  -2 -19   8    0.34    0.10
   2 -19  -8    0.43    0.12
   2  19  -7    1.45    0.16
   2  19  -7    1.14    0.15
   2  19  -7    1.21    0.13
   2 -19  -7    1.34    0.16
  -2 -19   7    1.21    0.14
   2  19  -6   14.08    0.52
  -2  19   6   14.84    0.59
   2  19  -6   14.67    0.59
   2  19  -6   14.16    0.56
  -2 -19   6   13.86    0.58
   2 -19  -6   14.01    0.63
  -2  19   5   14.54    0.59
   2  19  -5   14.64    0.57
   2  19  -5   14.17    0.53
   2  19  -5   14.73    0.60
  -2 -19   5   15.00    0.59
   2 -19  -5   14.34    0.64
   2  19  -4   20.10    0.70
   2  19  -4   20.84    0.78
  -2  19   4   20.08    0.77
   2  19  -4   20.88    0.74
   2 -19  -4   20.42    0.78
  -2 -19   4   19.98    0.77
   2 -19  -4   18.94    0.84
   2  19  -3    0.49    0.13
   2  19  -3    0.51    0.11
  -2  19   3    0.60    0.12
   2 -19  -3    0.52    0.12
   2 -19  -3    0.64    0.12
   2 -19  -3    0.55    0.11
  -2 -19   3    0.41    0.10
  -2  19   2   17.77    0.69
   2  19  -2   18.23    0.71
  -2  19   2   18.08    0.69
   2 -19  -2   17.98    0.70
  -2 -19   2   17.52    0.69
   2 -19  -2   17.74    0.72
  -2  19   1   30.44    1.10
  -2  19   1   29.93    1.09
   2  19  -1   31.52    1.12
   2 -19  -1   30.26    1.13
  -2 -19   1   30.91    1.12
   2  19   0   24.23    0.90
  -2  19   0   25.42    0.88
  -2  19   0   24.60    0.89
   2  19   0   22.48    0.87
  -2 -19   0   23.25    0.89
   2 -19   0   23.47    0.90
  -2  19  -1   16.40    0.63
  -2  19  -1   16.40    0.65
   2  19   1   16.94    0.67
   2  19   1   15.77    0.64
  -2 -19  -1   16.15    0.64
   2 -19   1   16.68    0.65
   2  19   2    3.68    0.25
   2  19   2    3.64    0.25
  -2  19  -2    3.51    0.26
  -2  19  -2    3.32    0.22
  -2  19  -3   18.57    0.72
   2  19   3   18.36    0.72
   2  19   3   17.63    0.71
   2 -19   3   18.68    0.72
   2  19   4   18.00    0.73
   2  19   4   18.65    0.73
  -2  19  -4   18.97    0.74
   2 -19   4   19.53    0.74
   2  19   5    2.06    0.21
  -2  19  -5    2.43    0.21
  -2 -19  -5    2.40    0.22
   2 -19   5    2.28    0.20
  -2  19  -6    6.37    0.33
   2  19   6    5.95    0.33
  -2  19  -6    5.86    0.30
  -2 -19  -6    6.35    0.34
   2 -19   6    5.56    0.31
  -2  19  -7    8.10    0.37
  -2  19  -7    8.68    0.40
  -2 -19  -7    8.83    0.43
   2 -19   7    8.66    0.38
  -2  19  -8    2.70    0.18
  -2  19  -8    2.54    0.20
  -2  19  -8    2.09    0.20
   2 -19   8    2.45    0.19
  -2 -19  -8    2.24    0.22
  -2  19  -9    5.08    0.24
  -2  19  -9    5.19    0.27
   2  19   9    5.65    0.28
  -2 -19  -9    5.88    0.30
  -2  19 -10    0.71    0.11
  -2  19 -10    0.82    0.09
   2  19  10    0.73    0.11
  -2 -19 -10    0.87    0.12
   2  19  11    2.68    0.16
  -2  19 -11    2.39    0.14
  -2  19 -11    2.53    0.15
  -2 -19 -11    2.91    0.17
   2  20 -11    0.67    0.08
   2 -20 -11    0.72    0.09
   2  20 -10    0.30    0.08
   2  20 -10    0.30    0.07
   2 -20 -10    0.41    0.09
  -2 -20  10    0.28    0.07
   2  20  -9    1.70    0.15
   2  20  -9    1.30    0.12
  -2 -20   9    1.58    0.14
   2 -20  -9    1.47    0.15
   2  20  -8    4.71    0.24
   2  20  -8    4.71    0.26
  -2 -20   8    5.41    0.27
   2 -20  -8    5.93    0.30
   2  20  -7    3.24    0.22
   2  20  -7    3.36    0.21
   2  20  -7    3.53    0.24
  -2 -20   7    3.45    0.23
   2 -20  -7    3.81    0.25
   2  20  -6    3.75    0.26
   2  20  -6    4.04    0.24
   2  20  -6    3.94    0.22
  -2 -20   6    4.16    0.25
   2 -20  -6    3.86    0.25
   2  20  -5   21.61    0.78
   2  20  -5   21.71    0.74
   2  20  -5   21.62    0.82
  -2  20   5   21.69    0.81
   2 -20  -5   20.48    0.89
  -2 -20   5   22.00    0.82
   2  20  -4   68.48    2.23
   2  20  -4   63.24    2.16
  -2  20   4   64.44    2.19
   2 -20  -4   62.41    2.49
  -2 -20   4   65.70    2.27
   2 -20  -4   63.96    2.27
  -2  20   3    2.58    0.22
   2  20  -3    2.78    0.24
   2 -20  -3    2.04    0.19
  -2 -20   3    2.20    0.20
   2 -20  -3    2.27    0.21
  -2  20   2   15.88    0.64
   2  20  -2   17.18    0.67
  -2  20   2   16.14    0.64
  -2 -20   2   16.60    0.65
   2 -20  -2   16.37    0.65
  -2  20   1   11.61    0.49
   2  20  -1   12.30    0.52
  -2  20   1   12.43    0.51
   2 -20  -1   11.49    0.50
  -2 -20   1   11.20    0.49
   2  20   0   25.96    0.97
  -2  20   0   26.16    0.94
   2  20   0   24.63    0.93
  -2  20   0   25.74    0.95
   2 -20   0   25.90    0.96
  -2 -20   0   25.83    0.96
   2  20   1   39.14    1.38
  -2  20  -1   39.03    1.37
  -2  20  -1   38.07    1.34
   2  20   1   38.07    1.36
   2 -20   1   39.43    1.40
  -2 -20  -1   38.12    1.39
   2  20   2    7.97    0.40
  -2  20  -2    7.46    0.35
   2  20   2    7.52    0.37
  -2  20  -2    8.07    0.39
   2 -20   2    7.95    0.37
   2  20   3    7.49    0.38
  -2  20  -3    7.14    0.38
   2  20   3    7.87    0.38
   2 -20   3    8.00    0.37
   2  20   4    9.34    0.43
  -2  20  -4    8.82    0.43
  -2 -20  -4    9.30    0.44
   2 -20   4    9.06    0.42
   2  20   5    3.26    0.25
  -2  20  -5    3.43    0.26
  -2 -20  -5    3.58    0.25
   2 -20   5    3.67    0.24
  -2  20  -6   14.45    0.60
   2 -20   6   15.10    0.60
  -2 -20  -6   15.36    0.66
  -2  20  -7    0.05    0.09
  -2  20  -7    0.34    0.10
  -2 -20  -7    0.16    0.10
   2 -20   7    0.11    0.09
  -2  20  -8    4.77    0.24
   2 -20   8    4.69    0.24
  -2 -20  -8    4.79    0.27
  -2  20  -9    0.61    0.10
   2  20   9    0.58    0.10
  -2 -20  -9    0.51    0.11
   2  20  10    6.07    0.27
  -2  20 -10    5.87    0.25
  -2 -20 -10    5.76    0.29
   2  21 -10    8.25    0.31
  -2  21  10    8.19    0.32
   2  21 -10    7.88    0.29
   2 -21 -10    8.28    0.36
   2  21  -9    0.16    0.08
   2  21  -9    0.27    0.07
  -2 -21   9    0.23    0.07
   2 -21  -9    0.14    0.08
   2  21  -8    6.90    0.28
   2  21  -8    6.61    0.30
  -2 -21   8    6.77    0.31
   2 -21  -8    7.47    0.35
   2  21  -7   23.92    0.79
   2  21  -7   23.09    0.86
   2  21  -7   23.59    0.84
   2 -21  -7   23.65    0.96
  -2 -21   7   24.42    0.88
   2  21  -6    9.56    0.37
   2  21  -6    9.89    0.40
   2  21  -6    9.65    0.43
  -2 -21   6   10.10    0.42
   2 -21  -6    9.72    0.45
   2  21  -5    5.08    0.30
   2  21  -5    5.19    0.26
  -2 -21   5    4.97    0.27
   2 -21  -5    4.92    0.29
  -2  21   4    5.14    0.29
   2  21  -4    5.20    0.31
  -2 -21   4    4.94    0.28
   2 -21  -4    5.06    0.27
   2 -21  -4    4.75    0.28
   2  21  -3   14.89    0.62
  -2  21   3   15.16    0.60
  -2 -21   3   14.72    0.60
   2 -21  -3   14.71    0.60
   2  21  -2    2.73    0.24
  -2  21   2    2.67    0.22
  -2 -21   2    2.79    0.21
   2 -21  -2    2.63    0.21
  -2  21   1    2.77    0.23
   2  21  -1    3.08    0.25
  -2  21   1    2.49    0.21
  -2 -21   1    2.60    0.21
   2 -21  -1    2.63    0.21
   2  21   0   29.71    1.07
  -2  21   0   27.48    1.04
   2  21   0   27.96    1.04
  -2  21   0   29.66    1.06
  -2 -21   0   29.75    1.07
   2 -21   0   29.94    1.08
  -2  21  -1    2.52    0.23
  -2  21  -1    2.86    0.21
   2  21   1    2.68    0.21
   2  21   1    2.92    0.24
  -2 -21  -1    2.92    0.21
   2 -21   1    3.05    0.22
  -2  21  -2   38.60    1.35
   2  21   2   36.38    1.33
   2  21   2   37.71    1.35
   2 -21   2   39.08    1.38
   2  21   3   50.84    1.79
  -2  21  -3   51.04    1.80
   2  21   3   51.92    1.80
  -2 -21  -3   51.64    2.02
   2 -21   3   54.55    1.85
  -2  21  -4    3.55    0.25
   2  21   4    3.60    0.25
   2 -21   4    3.56    0.24
  -2 -21  -4    3.29    0.24
  -2  21  -5    6.36    0.33
  -2 -21  -5    6.21    0.34
   2 -21   5    6.66    0.32
  -2  21  -6    0.76    0.13
   2 -21   6    0.72    0.12
  -2 -21  -6    0.60    0.12
  -2  21  -7    6.40    0.31
   2 -21   7    6.30    0.30
  -2 -21  -7    6.46    0.33
   2  21   8    0.08    0.08
  -2  21  -8    0.07    0.08
   2 -21   8    0.09    0.07
  -2 -21  -8    0.15    0.09
   2  21   9    0.66    0.10
  -2  21  -9    1.14    0.10
  -2 -21  -9    0.98    0.11
   2  21  10    3.46    0.18
  -2 -21 -10    3.74    0.19
   2  22  -9    0.38    0.06
  -2 -22   9    0.41    0.07
   2 -22  -9    0.47    0.08
   2  22  -8    3.25    0.16
  -2 -22   8    3.12    0.18
   2 -22  -8    3.33    0.20
   2  22  -7    0.55    0.10
   2  22  -7    0.62    0.09
  -2 -22   7    0.57    0.10
   2 -22  -7    0.57    0.10
   2  22  -6    0.18    0.09
  -2 -22   6    0.29    0.09
   2 -22  -6    0.19    0.09
   2  22  -5   12.67    0.52
  -2 -22   5   12.67    0.51
   2 -22  -5   12.41    0.55
   2  22  -4    1.51    0.17
   2 -22  -4    1.56    0.16
   2 -22  -4    1.45    0.14
  -2 -22   4    1.34    0.14
   2  22  -3   18.42    0.72
   2 -22  -3   18.13    0.71
  -2 -22   3   18.57    0.71
  -2  22   2   26.82    1.02
   2  22  -2   29.43    1.05
   2 -22  -2   28.67    1.05
  -2 -22   2   28.28    1.04
   2  22  -1   11.06    0.48
  -2  22   1   10.52    0.46
  -2  22   1   10.15    0.45
  -2 -22   1   10.36    0.45
   2 -22  -1   10.58    0.46
  -2  22   0   15.53    0.63
  -2  22   0   16.92    0.65
   2  22   0   16.05    0.66
  -2 -22   0   16.27    0.64
   2 -22   0   17.32    0.66
   2  22   1    0.22    0.11
  -2  22  -1    0.40    0.10
   2  22   1    0.32    0.10
  -2  22  -1    0.26    0.11
  -2 -22  -1    0.32    0.09
   2 -22   1    0.32    0.10
   2  22   2   15.96    0.64
  -2  22  -2   15.62    0.64
   2 -22   2   16.38    0.64
  -2  22  -3    7.55    0.36
   2  22   3    7.19    0.35
   2 -22   3    7.25    0.35
  -2 -22  -3    7.07    0.36
  -2  22  -4    4.60    0.27
  -2 -22  -4    4.58    0.27
   2 -22   4    4.57    0.26
  -2  22  -5   15.47    0.62
  -2 -22  -5   16.25    0.68
   2 -22   5   15.99    0.62
  -2  22  -6    6.64    0.33
  -2 -22  -6    6.89    0.34
   2 -22   6    7.08    0.32
   2 -22   7    1.54    0.15
  -2 -22  -7    1.49    0.14
   2  22   8    6.59    0.29
   2 -22   8    6.18    0.28
  -2 -22  -8    7.24    0.32
   2  22   9    0.90    0.09
  -2 -22  -9    1.00    0.10
   2 -23  -8    0.64    0.09
  -2 -23   8    0.56    0.08
   2 -23  -7    7.56    0.35
  -2 -23   7    8.11    0.33
  -2 -23   6   12.84    0.51
   2 -23  -6   13.24    0.55
   2  23  -5    0.64    0.12
  -2 -23   5    0.48    0.10
   2 -23  -5    0.51    0.10
   2  23  -4    4.37    0.27
  -2 -23   4    4.64    0.25
   2 -23  -4    4.50    0.24
   2  23  -3    1.93    0.18
  -2 -23   3    2.06    0.18
   2 -23  -3    1.98    0.17
   2  23  -2   27.60    1.04
   2 -23  -2   29.03    1.05
  -2 -23   2   29.25    1.05
  -2  23   1   17.53    0.69
   2  23  -1   18.71    0.71
   2 -23  -1   18.25    0.70
  -2 -23   1   17.54    0.69
  -2  23   0    4.04    0.26
   2  23   0    4.40    0.28
  -2 -23   0    4.27    0.24
   2 -23   0    4.29    0.25
  -2  23  -1    4.86    0.28
   2  23   1    4.68    0.28
   2 -23   1    5.28    0.28
  -2 -23  -1    4.74    0.26
  -2 -23  -1    4.69    0.25
   2  23   2   17.26    0.67
  -2  23  -2   17.51    0.67
  -2 -23  -2   17.12    0.72
   2 -23   2   17.70    0.68
  -2  23  -3    2.70    0.21
  -2 -23  -3    2.67    0.20
   2 -23   3    2.88    0.21
  -2  23  -4   15.27    0.61
   2 -23   4   16.45    0.62
  -2 -23  -4   15.42    0.66
  -2  23  -5    0.60    0.12
   2 -23   5    0.71    0.11
  -2 -23  -5    0.67    0.11
   2 -23   6    0.96    0.11
  -2 -23  -6    1.30    0.13
   2  23   7    0.58    0.09
   2 -23   7    0.63    0.09
  -2 -23  -7    0.59    0.10
   2  23   8    1.31    0.12
  -2 -23  -8    1.47    0.13
  -2 -24   7    0.41    0.07
   2 -24  -7    0.34    0.07
   2 -24  -6    0.10    0.06
  -2 -24   6    0.05    0.07
  -2 -24   5   63.28    2.14
   2 -24  -5   60.30    2.35
  -2 -24   4    6.48    0.30
   2  24  -3   20.51    0.78
  -2 -24   3   21.57    0.79
   2 -24  -3   21.51    0.78
   2  24  -2   17.52    0.68
   2 -24  -2   18.16    0.68
  -2 -24   2   17.80    0.67
   2  24  -1    0.15    0.09
   2 -24  -1    0.13    0.09
  -2 -24   1    0.14    0.08
   2  24   0    4.95    0.28
  -2  24   0    5.22    0.27
  -2 -24   0    4.95    0.26
   2 -24   0    5.55    0.27
  -2  24  -1   35.00    1.24
   2  24   1   35.45    1.25
   2 -24   1   36.69    1.27
  -2 -24  -1   35.04    1.26
  -2 -24  -1   34.58    1.37
  -2  24  -2   11.93    0.49
   2 -24   2   12.32    0.49
  -2 -24  -2   11.76    0.51
  -2 -24  -3    0.28    0.09
   2 -24   3    0.10    0.08
   2 -24   4    4.07    0.23
  -2 -24  -4    4.09    0.23
  -2 -24  -5   37.40    1.45
   2 -24   5   37.72    1.33
   2  24   6    0.87    0.09
  -2 -24  -6    1.06    0.11
   2 -24   6    0.95    0.10
   2  24   7    3.17    0.16
  -2 -24  -7    3.06    0.18
   2 -24   7    3.18    0.16
  -2 -25   6    3.66    0.18
  -2 -25   5    7.87    0.32
  -2 -25   4    4.89    0.23
  -2 -25   3    0.24    0.08
   2 -25  -3    0.30    0.08
   2 -25  -2   12.06    0.47
  -2 -25   2   11.62    0.46
   2 -25  -1    4.09    0.22
  -2 -25   1    4.03    0.21
  -2 -25   0    2.93    0.18
   2 -25   0    3.10    0.20
   2 -25   1    8.59    0.37
   2 -25   2    0.28    0.08
  -2 -25  -2    0.33    0.08
  -2 -25  -3   23.39    0.93
   2 -25   3   23.61    0.85
   2 -25   4    4.01    0.20
  -2 -25  -4    3.57    0.20
   2  25   5    0.83    0.08
  -2 -25  -5    0.79    0.09
   2 -25   5    0.97    0.09
  -2 -25  -6    4.93    0.22
   2 -25   6    4.41    0.21
  -2 -26   5    2.08    0.13
  -2 -26   4   14.88    0.55
  -2 -26   3    0.58    0.08
   2 -26  -2    0.52    0.08
  -2 -26   2    0.48    0.08
  -2 -26   1    4.32    0.21
   2 -26  -1    4.29    0.21
   2 -26   0    0.13    0.07
  -2 -26   0    0.02    0.06
   2 -26   1    0.89    0.10
   2 -26   2    1.89    0.14
  -2 -26  -3    1.00    0.10
   2 -26   3    1.21    0.10
   2 -26   4    8.16    0.33
  -2 -26  -4    8.52    0.35
   2 -27   0    0.50    0.07
   2 -27   1    1.09    0.10
   2 -27   2    0.77    0.08
   3   0 -16   16.10    0.58
   3   0 -15    0.01    0.09
   3   0 -14    9.75    0.43
   3   0 -13    0.18    0.11
   3   0 -12    3.16    0.23
   3   0 -11    0.04    0.08
  -3   0  11    0.00    0.08
   3   0 -11   -0.01    0.09
  -3   0  10    0.08    0.07
   3   0  -9    0.02    0.07
  -3   0   9    0.14    0.07
   3   0  -8   25.64    0.92
  -3   0   8   26.01    0.84
   3   0  -7    0.03    0.05
  -3   0   7    0.22    0.06
  -3   0   7    0.13    0.07
  -3   0   6  164.61    4.98
  -3   0   6  163.68    5.10
   3   0  -6  164.52    5.47
  -3   0   5    0.00    0.05
  -3   0   5    0.18    0.05
   3   0  -5   -0.04    0.04
   3   0  -4  187.94    6.00
  -3   0   4  178.54    5.58
  -3   0   4  181.58    5.47
  -3   0   4  185.28    5.58
   3   0  -4  170.52    5.56
  -3   0   3    0.02    0.04
   3   0  -3    0.00    0.04
  -3   0   3    0.00    0.03
  -3   0   2   20.42    0.65
   3   0  -2   20.66    0.71
  -3   0   2   20.85    0.65
   3   0  -1   -0.09    0.09
   3   0  -1   -0.12    0.03
  -3   0   0   14.75    0.67
  -3   0  -1    0.13    0.03
  -3   0  -1    0.09    0.03
   3   0   1    0.15    0.04
   3   0   1    0.31    0.04
   3   0   2    6.02    0.21
  -3   0  -2    5.83    0.22
   3   0   2    5.95    0.21
  -3   0  -2    5.98    0.22
  -3   0  -3    0.00    0.04
   3   0   3    0.15    0.04
  -3   0  -3    0.04    0.04
   3   0   3    0.10    0.04
   3   0   4  301.30    9.39
  -3   0  -4  302.55    9.39
  -3   0  -4  310.46    9.39
   3   0   4  308.32    9.22
   3   0   4  303.62    9.83
   3   0   5    0.30    0.06
   3   0   5    0.37    0.06
  -3   0  -5    0.41    0.08
  -3   0  -6   47.34    1.56
   3   0   6   48.81    1.50
   3   0   6   48.00    1.59
   3   0   7    0.09    0.07
   3   0   7    0.12    0.06
   3   0   8    6.88    0.30
   3   0   9    0.09    0.09
  -3   0 -10    1.15    0.13
   3   0  10    1.69    0.15
   3   0  10    1.22    0.15
  -3   0 -10    1.40    0.14
  -3   0 -11   -0.13    0.09
  -3   0 -11   -0.05    0.08
   3   0  11   -0.01    0.09
  -3   0 -12    0.12    0.09
  -3   0 -12    0.21    0.14
  -3   0 -12    0.24    0.12
  -3   0 -13    0.05    0.12
  -3   0 -13   -0.02    0.09
  -3   0 -14    5.27    0.26
  -3   0 -14    5.30    0.30
  -3   0 -15    0.05    0.08
   3   1 -16    0.04    0.07
   3  -1 -16    0.11    0.08
   3   1 -15    1.29    0.14
   3  -1 -15    1.30    0.14
   3   1 -14    0.09    0.10
   3  -1 -14    0.06    0.11
   3   1 -13    3.70    0.25
   3  -1 -13    3.67    0.26
   3   1 -12    0.37    0.11
   3  -1 -12    0.30    0.11
   3  -1 -12    0.36    0.11
   3   1 -11    0.16    0.09
   3  -1 -11    0.19    0.09
  -3  -1  11    0.37    0.10
   3  -1 -11    0.22    0.10
  -3   1  10    3.51    0.20
  -3  -1  10    3.33    0.21
  -3   1   9    5.19    0.24
  -3  -1   9    5.21    0.24
  -3   1   8    3.68    0.18
   3   1  -8    3.51    0.19
  -3  -1   8    3.66    0.18
   3  -1  -8    3.66    0.19
  -3   1   7   71.97    2.33
  -3   1   7   74.07    2.24
   3   1  -7   73.37    2.46
  -3  -1   7   73.48    2.24
   3  -1  -7   72.98    2.46
  -3  -1   7   70.68    2.32
   3   1  -6    6.78    0.29
  -3   1   6    7.15    0.26
  -3   1   6    7.49    0.30
  -3  -1   6    7.13    0.30
   3  -1  -6    6.87    0.29
  -3  -1   6    7.34    0.26
  -3   1   5    2.76    0.16
  -3   1   5    3.16    0.13
   3   1  -5    2.80    0.15
   3  -1  -5    3.00    0.15
  -3  -1   5    2.74    0.15
  -3  -1   5    2.97    0.14
   3   1  -4   51.01    1.70
  -3   1   4   56.13    1.72
  -3   1   4   55.91    1.67
  -3   1   4   55.75    1.72
   3   1  -4   55.99    1.83
  -3  -1   4   54.77    1.71
   3  -1  -4   55.16    1.84
   3  -1  -4   52.75    1.70
  -3  -1   4   53.18    1.71
  -3   1   3  102.73    3.19
  -3   1   3  103.50    3.19
   3   1  -3  105.11    3.43
  -3  -1   3  102.96    3.19
   3  -1  -3  103.58    3.43
  -3  -1   3  105.10    3.18
   3  -1  -3   98.60    3.17
   3   1  -2   15.92    0.56
  -3   1   2   16.42    0.52
  -3   1   2   16.59    0.52
  -3  -1   2   16.14    0.52
  -3  -1   2   16.63    0.52
   3  -1  -2   15.82    0.56
   3   1  -1    0.15    0.10
   3   1  -1    0.11    0.03
   3  -1  -1    0.08    0.08
   3  -1  -1    0.11    0.03
  -3   1   0    0.29    0.08
  -3  -1   0    0.22    0.09
   3  -1   0    0.24    0.05
  -3   1  -1  160.38    5.02
  -3   1  -1  169.06    5.02
   3   1   1  162.54    4.94
   3  -1   1  157.28    5.44
  -3  -1  -1  167.59    5.01
  -3   1  -2  133.39    3.99
  -3   1  -2  128.32    3.99
   3   1   2  125.25    3.98
   3   1   2  128.32    3.92
   3  -1   2  125.95    3.91
  -3  -1  -2  134.23    3.99
  -3  -1  -2  131.73    3.98
   3  -1   2  127.63    3.99
  -3   1  -3   81.01    2.58
   3   1   3   84.22    2.53
   3   1   3   82.86    2.58
  -3   1  -3   86.66    2.59
  -3  -1  -3   82.75    2.58
   3  -1   3   83.84    2.53
  -3  -1  -3   81.78    2.58
   3  -1   3   81.57    2.58
  -3   1  -4    0.77    0.09
   3   1   4    0.68    0.07
   3   1   4    0.81    0.07
  -3   1  -4    0.63    0.08
   3   1   4    0.53    0.07
   3  -1   4    0.58    0.08
  -3  -1  -4    0.74    0.08
  -3  -1  -4    0.61    0.08
   3  -1   4    0.68    0.07
   3  -1   4    0.60    0.07
   3   1   5   46.46    1.54
   3   1   5   46.67    1.45
  -3   1  -5   47.00    1.50
   3  -1   5   46.12    1.53
  -3  -1  -5   46.18    1.50
   3  -1   5   46.60    1.45
   3   1   6   28.14    0.95
   3   1   6   29.84    0.91
  -3   1  -6   27.79    0.95
   3  -1   6   27.32    0.95
   3  -1   6   28.19    0.91
  -3  -1  -6   27.52    0.95
   3   1   7   24.98    0.86
   3   1   7   25.67    0.83
   3  -1   7   24.55    0.82
   3   1   8    1.66    0.15
   3  -1   8    1.44    0.14
   3   1   9    0.06    0.08
   3  -1   9    0.16    0.09
  -3   1 -10    4.06    0.23
   3   1  10    4.53    0.25
  -3   1 -10    4.19    0.24
   3   1  10    4.22    0.23
   3  -1  10    4.08    0.25
  -3  -1 -10    4.17    0.24
  -3  -1 -10    3.87    0.23
   3   1  11    3.50    0.24
  -3   1 -11    3.42    0.21
  -3   1 -11    3.21    0.23
  -3  -1 -11    3.56    0.22
  -3  -1 -11    3.07    0.23
   3  -1  11    3.30    0.24
  -3   1 -12    4.00    0.24
  -3   1 -12    4.16    0.27
  -3   1 -12    3.84    0.28
  -3  -1 -12    4.23    0.24
  -3  -1 -12    4.19    0.27
  -3   1 -13    0.78    0.17
  -3   1 -13    0.72    0.12
  -3   1 -13    0.83    0.15
  -3  -1 -13    0.74    0.12
  -3  -1 -13    0.95    0.15
  -3   1 -14    0.13    0.13
  -3   1 -14    0.10    0.09
  -3  -1 -14    0.16    0.10
  -3   1 -15    0.52    0.09
  -3  -1 -15    0.75    0.10
   3   2 -16    0.75    0.09
   3  -2 -16    0.92    0.10
   3   2 -15    2.63    0.20
   3  -2 -15    2.86    0.21
   3   2 -14    4.12    0.25
   3  -2 -14    4.05    0.27
   3   2 -13    0.04    0.10
   3  -2 -13    0.26    0.12
   3   2 -12    1.72    0.17
   3  -2 -12    1.73    0.17
   3  -2 -12    1.80    0.18
   3   2 -11    0.26    0.10
   3  -2 -11    0.21    0.09
  -3  -2  11    0.33    0.09
   3  -2 -11    0.12    0.10
  -3   2  10    2.94    0.19
   3  -2 -10    3.05    0.22
  -3  -2  10    2.96    0.20
  -3   2   9    9.45    0.36
  -3  -2   9    9.46    0.37
  -3   2   8    9.59    0.35
  -3  -2   8    9.73    0.36
   3  -2  -8    9.65    0.39
  -3   2   7   24.47    0.78
  -3   2   7   24.39    0.85
   3   2  -7   24.40    0.86
  -3  -2   7   23.38    0.85
   3  -2  -7   24.71    0.87
  -3  -2   7   24.95    0.79
  -3   2   6   18.23    0.57
  -3   2   6   17.59    0.62
   3   2  -6   17.53    0.63
  -3  -2   6   17.69    0.58
   3  -2  -6   17.22    0.54
  -3  -2   6   17.27    0.62
   3  -2  -6   17.35    0.63
   3   2  -5  151.03    4.95
  -3   2   5  149.85    4.51
  -3   2   5  144.94    4.62
  -3  -2   5  151.02    4.62
   3  -2  -5  149.89    4.95
  -3  -2   5  145.85    4.52
  -3   2   4   35.61    1.07
   3   2  -4   33.19    1.10
  -3   2   4   35.11    1.12
  -3   2   4   35.24    1.12
   3   2  -4   34.61    1.18
  -3  -2   4   33.72    1.11
  -3  -2   4   35.39    1.11
   3  -2  -4   33.94    1.10
   3  -2  -4   36.02    1.19
  -3   2   3    2.16    0.11
  -3   2   3    2.05    0.09
   3   2  -3    2.18    0.11
  -3   2   3    2.15    0.11
  -3  -2   3    1.96    0.11
   3  -2  -3    1.98    0.09
   3  -2  -3    2.05    0.11
  -3  -2   3    2.14    0.11
   3   2  -2    1.68    0.18
  -3   2   2    1.51    0.10
   3   2  -2    1.39    0.09
   3   2  -2    1.52    0.09
  -3   2   2    1.61    0.08
   3  -2  -2    1.47    0.09
  -3  -2   2    1.51    0.08
  -3  -2   2    1.59    0.08
  -3   2   1    4.67    0.18
   3   2  -1    4.65    0.30
   3   2  -1    4.56    0.18
  -3   2   1    4.71    0.16
   3   2  -1    4.50    0.18
   3  -2  -1    4.68    0.25
   3  -2  -1    4.72    0.18
  -3   2   0    0.62    0.05
  -3   2   0    0.57    0.08
   3   2   0    0.57    0.05
   3   2   0    0.62    0.06
  -3   2   0    0.75    0.05
   3  -2   0    0.66    0.05
   3  -2   0    0.58    0.07
  -3  -2   0    0.66    0.13
   3   2   1   31.43    1.00
  -3   2  -1   34.18    1.01
  -3   2  -1   31.28    1.02
  -3  -2  -1   33.79    1.01
  -3  -2  -1   31.95    1.01
   3  -2   1   30.82    1.10
   3   2   2    0.87    0.06
  -3   2  -2    0.92    0.08
   3   2   2    1.03    0.07
  -3   2  -2    1.05    0.08
   3  -2   2    1.11    0.09
  -3  -2  -2    0.89    0.08
   3  -2   2    1.12    0.09
  -3  -2  -2    0.86    0.07
   3  -2   2    0.94    0.07
  -3   2  -3   43.10    1.44
   3   2   3   45.02    1.43
  -3   2  -3   47.71    1.44
   3   2   3   45.57    1.40
   3  -2   3   44.59    1.44
  -3  -2  -3   46.84    1.44
  -3  -2  -3   46.20    1.44
   3  -2   3   45.07    1.40
  -3   2  -4   74.42    2.43
   3   2   4   79.71    2.53
   3   2   4   79.17    2.37
   3   2   4   76.40    2.42
  -3   2  -4   79.76    2.43
  -3  -2  -4   75.54    2.43
  -3  -2  -4   80.05    2.43
   3  -2   4   78.24    2.53
   3  -2   4   76.04    2.43
   3  -2   4   75.46    2.37
  -3   2  -5  144.92    4.45
   3   2   5  140.33    4.64
   3   2   5  148.12    4.36
   3  -2   5  141.70    4.63
   3  -2   5  143.44    4.35
  -3  -2  -5  140.16    4.45
   3   2   6   22.86    0.72
  -3   2  -6   22.05    0.77
   3   2   6   21.88    0.76
   3  -2   6   21.37    0.75
  -3  -2  -6   21.36    0.77
   3  -2   6   22.48    0.72
   3   2   7    0.21    0.07
   3   2   7    0.24    0.07
   3  -2   7    0.19    0.07
   3   2   8    0.12    0.08
   3  -2   8    0.08    0.08
   3   2   9    0.46    0.10
   3  -2   9    0.40    0.10
   3   2  10    0.19    0.10
  -3   2 -10    0.30    0.09
   3   2  10    0.29    0.10
  -3   2 -10    0.04    0.09
   3  -2  10    0.30    0.11
  -3  -2 -10    0.32    0.10
  -3  -2 -10    0.22    0.10
  -3   2 -11   16.37    0.60
  -3   2 -11   16.28    0.59
   3   2  11   15.74    0.61
  -3  -2 -11   16.47    0.59
  -3  -2 -11   15.60    0.60
   3  -2  11   16.11    0.62
  -3   2 -12    2.15    0.21
  -3   2 -12    2.09    0.18
  -3   2 -12    1.82    0.18
  -3  -2 -12    1.90    0.17
  -3  -2 -12    2.28    0.19
  -3   2 -13    8.93    0.41
  -3   2 -13    8.29    0.42
  -3   2 -13    9.27    0.38
  -3  -2 -13    9.52    0.40
  -3   2 -14    5.04    0.32
  -3   2 -14    5.47    0.30
  -3   2 -14    5.20    0.26
  -3  -2 -14    5.21    0.27
  -3   2 -15    1.72    0.15
  -3   2 -15    1.83    0.14
  -3  -2 -15    2.21    0.16
   3   3 -16    0.11    0.07
   3  -3 -16    0.09    0.07
   3   3 -15    0.13    0.09
   3  -3 -15    0.08    0.10
   3   3 -14   14.71    0.56
   3  -3 -14   14.35    0.58
   3   3 -13    0.47    0.12
   3  -3 -13    0.53    0.12
   3  -3 -13    0.69    0.14
   3   3 -12   13.21    0.54
   3  -3 -12   13.32    0.60
   3  -3 -12   13.86    0.56
   3   3 -11    0.89    0.13
   3  -3 -11    0.80    0.12
  -3  -3  11    0.80    0.13
   3  -3 -11    0.89    0.14
   3   3 -10    0.92    0.12
  -3  -3  10    0.91    0.12
   3  -3 -10    0.75    0.12
  -3  -3   9    7.15    0.31
  -3   3   8   84.70    2.59
   3  -3  -8   84.01    2.85
  -3  -3   8   84.14    2.61
  -3   3   7    0.49    0.07
  -3   3   7    0.55    0.10
  -3  -3   7    0.61    0.08
  -3  -3   7    0.42    0.10
   3  -3  -7    0.39    0.08
  -3   3   6   75.39    2.44
   3   3  -6   76.39    2.58
  -3   3   6   78.26    2.35
   3  -3  -6   74.92    2.22
  -3  -3   6   76.14    2.43
   3  -3  -6   78.01    2.59
  -3  -3   6   77.79    2.36
  -3   3   5    1.05    0.11
   3   3  -5    1.17    0.10
  -3   3   5    1.32    0.08
   3  -3  -5    1.14    0.10
  -3  -3   5    1.10    0.10
   3   3  -4   65.68    2.18
  -3   3   4   65.03    2.05
   3   3  -4   61.71    2.03
  -3   3   4   68.11    1.98
  -3   3   4   63.62    2.04
   3  -3  -4   63.38    2.03
  -3  -3   4   66.50    2.04
   3  -3  -4   68.13    2.19
  -3  -3   4   62.78    2.04
  -3   3   3    8.51    0.30
   3   3  -3    7.97    0.30
   3   3  -3    8.24    0.31
  -3   3   3    8.46    0.31
   3  -3  -3    8.57    0.31
  -3  -3   3    8.59    0.30
   3  -3  -3    8.13    0.28
  -3  -3   3    8.18    0.30
   3   3  -2   94.75    3.22
   3   3  -2   97.34    3.91
   3   3  -2   93.56    2.95
  -3   3   2   99.11    3.00
  -3   3   2   95.94    3.01
   3  -3  -2   99.69    3.23
  -3  -3   2   94.07    3.00
  -3  -3   2  101.31    2.99
   3  -3  -2   95.86    2.98
  -3   3   1   38.36    1.20
   3   3  -1   37.75    1.62
  -3   3   1   37.04    1.22
   3   3  -1   36.54    1.20
   3  -3  -1   38.23    1.29
  -3  -3   1   37.89    1.21
  -3  -3   1   38.50    1.19
  -3   3   0    2.97    0.13
   3   3   0    3.13    0.14
  -3   3   0    3.00    0.14
  -3  -3   0    3.31    0.12
  -3  -3   0    2.86    0.13
   3  -3   0    2.75    0.16
   3  -3   0    2.93    0.13
  -3  -3   0    2.63    0.24
  -3   3  -1    2.57    0.14
   3   3   1    2.46    0.12
  -3   3  -1    2.59    0.12
  -3  -3  -1    2.77    0.13
   3  -3   1    2.36    0.13
  -3  -3  -1    2.65    0.21
   3  -3   1    2.38    0.13
  -3  -3  -1    2.60    0.11
   3   3   2  267.13    7.98
  -3   3  -2  252.72    8.12
  -3   3  -2  273.44    8.11
   3   3   2  255.13    8.10
   3  -3   2  267.46    7.97
  -3  -3  -2  265.11    8.11
   3  -3   2  264.40    8.79
  -3  -3  -2  276.86    8.11
   3  -3   2  253.95    8.12
  -3   3  -3    1.17    0.10
  -3   3  -3    1.50    0.11
   3   3   3    1.37    0.09
   3   3   3    1.43    0.09
   3   3   3    1.46    0.10
   3  -3   3    1.41    0.09
  -3  -3  -3    1.38    0.10
  -3  -3  -3    1.19    0.10
   3  -3   3    1.48    0.11
  -3   3  -4   37.03    1.15
   3   3   4   34.13    1.14
   3   3   4   36.85    1.11
   3   3   4   36.61    1.19
  -3   3  -4   32.42    1.15
  -3  -3  -4   35.11    1.15
  -3  -3  -4   34.87    1.15
   3  -3   4   34.65    1.15
   3  -3   4   36.60    1.11
   3  -3   4   35.84    1.18
   3   3   5    1.18    0.10
  -3   3  -5    1.15    0.12
   3   3   5    1.24    0.11
   3  -3   5    1.24    0.11
   3  -3   5    1.46    0.10
  -3  -3  -5    1.16    0.12
   3   3   6   30.30    1.02
  -3   3  -6   30.01    1.02
   3   3   6   31.19    0.97
  -3  -3  -6   30.23    1.02
   3  -3   6   29.86    0.97
   3  -3   6   29.51    1.01
   3   3   7    7.07    0.30
   3   3   7    7.45    0.30
   3  -3   7    6.85    0.29
   3   3   8    9.00    0.35
   3  -3   8    7.93    0.35
   3   3   9    0.85    0.12
   3  -3   9    0.56    0.11
   3   3  10   11.43    0.44
  -3   3 -10   11.00    0.43
   3   3  10   11.99    0.46
  -3   3 -10   11.16    0.44
   3  -3  10   10.62    0.46
  -3  -3 -10   11.07    0.45
  -3  -3 -10   11.58    0.44
  -3   3 -11    0.05    0.12
  -3   3 -11    0.20    0.11
   3   3  11    0.11    0.10
  -3   3 -11    0.09    0.08
  -3  -3 -11   -0.07    0.10
  -3  -3 -11    0.01    0.09
   3  -3  11    0.07    0.11
  -3   3 -12   11.10    0.46
  -3   3 -12   11.38    0.45
  -3   3 -12   10.46    0.49
  -3  -3 -12   11.33    0.46
  -3   3 -13    0.05    0.09
  -3   3 -13    0.06    0.12
  -3   3 -13   -0.04    0.13
  -3  -3 -13    0.13    0.10
  -3   3 -14    0.15    0.13
  -3   3 -14    0.08    0.08
  -3   3 -14    0.00    0.12
  -3  -3 -14    0.09    0.10
  -3   3 -15    0.01    0.10
  -3   3 -15   -0.04    0.07
  -3  -3 -15    0.04    0.08
   3   4 -16    0.56    0.08
   3  -4 -16    0.61    0.09
   3   4 -15    4.89    0.24
   3  -4 -15    4.77    0.27
   3   4 -14    0.88    0.13
   3  -4 -14    0.82    0.14
   3   4 -13    0.21    0.11
   3  -4 -13    0.44    0.11
   3  -4 -13    0.23    0.12
   3   4 -12    1.40    0.16
   3  -4 -12    1.73    0.19
   3  -4 -12    1.66    0.17
   3   4 -11    0.84    0.12
   3   4 -11    0.64    0.15
   3  -4 -11    0.62    0.12
  -3  -4  11    0.64    0.12
   3  -4 -11    0.55    0.13
   3   4 -10    0.24    0.09
   3   4 -10    0.19    0.13
   3  -4 -10    0.15    0.09
  -3  -4  10    0.19    0.09
   3  -4 -10    0.14    0.10
  -3  -4   9    2.33    0.18
   3  -4  -8    3.09    0.19
  -3  -4   8    3.58    0.19
  -3   4   7   28.01    0.86
  -3   4   7   25.61    0.94
  -3  -4   7   27.52    0.88
  -3  -4   7   26.48    0.94
   3  -4  -7   27.11    0.96
  -3   4   6   48.62    1.63
  -3   4   6   49.83    1.55
  -3  -4   6   50.78    1.63
   3  -4  -6   49.21    1.47
  -3  -4   6   51.26    1.57
   3  -4  -6   51.64    1.72
  -3   4   5  133.95    4.32
  -3   4   5  138.69    4.20
   3  -4  -5  141.28    4.63
  -3  -4   5  140.97    4.32
  -3   4   4   24.39    0.81
  -3   4   4   24.83    0.75
  -3   4   4   23.98    0.81
   3   4  -4   23.02    0.80
  -3  -4   4   25.04    0.80
   3  -4  -4   25.20    0.85
  -3  -4   4   23.40    0.80
   3   4  -3    0.66    0.08
  -3   4   3    0.58    0.08
   3  -4  -3    0.52    0.07
   3  -4  -3    0.57    0.06
  -3  -4   3    0.53    0.07
  -3  -4   3    0.65    0.07
   3   4  -2   23.69    0.78
  -3   4   2   24.09    0.80
   3   4  -2   24.80    1.08
  -3  -4   2   24.88    0.78
  -3  -4   2   23.42    0.79
   3  -4  -2   23.95    0.77
   3  -4  -2   24.75    0.84
   3   4  -1    0.06    0.06
   3   4  -1    0.00    0.12
  -3   4   1    0.09    0.05
  -3   4   1    0.12    0.07
   3  -4  -1    0.00    0.06
  -3  -4   1    0.07    0.05
   3  -4  -1    0.04    0.04
   3  -4  -1    0.07    0.03
  -3  -4   1    0.06    0.04
   3   4   0   14.57    0.48
  -3   4   0   14.29    0.51
  -3   4   0   15.06    0.49
  -3  -4   0   14.75    0.50
   3  -4   0   14.26    0.53
  -3  -4   0   14.29    0.70
  -3  -4   0   15.08    0.48
  -3   4  -1   25.99    0.82
   3   4   1   25.13    0.80
   3   4   1   25.65    0.80
  -3   4  -1   24.79    0.84
   3  -4   1   24.72    0.89
  -3  -4  -1   25.65    0.83
   3  -4   1   24.76    0.83
  -3  -4  -1   27.88    0.82
   3   4   2    4.07    0.17
  -3   4  -2    3.96    0.19
   3   4   2    4.26    0.16
  -3   4  -2    4.35    0.18
   3  -4   2    4.36    0.16
   3  -4   2    4.18    0.19
  -3  -4  -2    4.22    0.18
   3  -4   2    4.31    0.20
  -3   4  -3   49.79    1.67
   3   4   3   53.82    1.62
  -3   4  -3   55.19    1.67
   3   4   3   52.32    1.73
   3   4   3   49.51    1.65
  -3  -4  -3   53.69    1.67
  -3  -4  -3   54.20    1.67
   3  -4   3   52.35    1.68
   3  -4   3   53.06    1.62
  -3   4  -4   54.95    1.70
   3   4   4   54.44    1.76
   3   4   4   54.05    1.65
  -3   4  -4   51.47    1.73
   3  -4   4   52.84    1.65
   3  -4   4   52.11    1.75
  -3  -4  -4   53.67    1.70
   3   4   5   72.33    2.15
   3   4   5   70.95    2.29
  -3   4  -5   70.13    2.22
   3  -4   5   66.01    2.27
   3  -4   5   70.86    2.15
  -3  -4  -5   67.76    2.21
  -3   4  -6    2.12    0.16
   3   4   6    2.15    0.14
   3   4   6    1.97    0.14
  -3  -4  -6    2.05    0.16
   3  -4   6    2.11    0.12
   3  -4   6    2.28    0.15
   3   4   7    2.11    0.15
   3   4   7    2.04    0.15
   3  -4   7    1.86    0.15
   3   4   8    4.42    0.23
   3   4   8    4.81    0.24
   3  -4   8    4.61    0.24
   3   4   9    0.46    0.11
   3  -4   9    0.43    0.11
   3   4  10    0.11    0.10
  -3   4 -10    0.29    0.10
   3   4  10    0.14    0.10
  -3   4 -10    0.18    0.08
   3  -4  10    0.08    0.09
  -3  -4 -10    0.32    0.10
  -3   4 -11   16.46    0.62
  -3   4 -11   17.09    0.66
  -3   4 -11   17.53    0.62
   3   4  11   17.02    0.64
  -3  -4 -11   17.11    0.64
   3  -4  11   16.83    0.65
  -3   4 -12    0.31    0.13
  -3   4 -12    0.43    0.10
  -3   4 -12    0.39    0.14
  -3  -4 -12    0.41    0.12
  -3   4 -13    0.83    0.15
  -3   4 -13    0.96    0.17
  -3   4 -13    1.25    0.14
  -3  -4 -13    1.35    0.16
  -3   4 -14    3.64    0.21
  -3   4 -14    3.84    0.26
  -3   4 -14    3.62    0.26
  -3  -4 -14    3.74    0.23
  -3   4 -15    0.07    0.10
  -3  -4 -15    0.30    0.09
   3   5 -15    0.21    0.09
   3  -5 -15    0.21    0.10
   3   5 -14    1.48    0.15
   3  -5 -14    1.61    0.17
   3  -5 -14    1.10    0.16
   3   5 -13    6.24    0.32
   3  -5 -13    6.46    0.35
   3  -5 -13    6.50    0.35
   3   5 -12    0.30    0.15
   3   5 -12    0.24    0.11
   3  -5 -12    0.29    0.12
   3  -5 -12    0.29    0.11
   3   5 -11    0.18    0.10
   3   5 -11    0.22    0.13
  -3  -5  11    0.31    0.11
   3  -5 -11    0.17    0.11
   3  -5 -11    0.27    0.11
   3   5 -10    1.00    0.12
   3   5 -10    1.22    0.16
   3  -5 -10    0.90    0.15
   3  -5 -10    0.97    0.14
  -3  -5  10    0.78    0.12
  -3  -5   9    1.98    0.17
  -3  -5   8   17.41    0.61
   3  -5  -8   17.29    0.65
  -3   5   7  105.01    3.46
  -3  -5   7  113.00    3.36
  -3  -5   7  106.79    3.45
   3  -5  -7  112.98    3.67
   3  -5  -7  107.53    3.16
  -3   5   6   24.03    0.87
   3  -5  -6   25.91    0.90
  -3  -5   6   25.67    0.88
  -3  -5   6   25.94    0.83
   3  -5  -6   25.55    0.77
  -3   5   5    3.75    0.20
  -3   5   5    3.54    0.17
   3  -5  -5    3.67    0.18
  -3  -5   5    3.72    0.19
  -3   5   4   17.97    0.66
  -3   5   4   18.89    0.66
  -3  -5   4   19.72    0.65
   3  -5  -4   19.55    0.68
   3   5  -3  102.33    4.09
  -3   5   3  102.85    3.15
   3   5  -3   98.53    3.13
   3  -5  -3  102.64    3.36
   3  -5  -3   96.22    3.12
  -3  -5   3  104.44    3.13
  -3  -5   3   97.31    3.14
  -3   5   2   17.45    0.58
  -3   5   2   16.68    0.60
   3   5  -2   17.27    0.57
   3   5  -2   16.20    0.57
   3   5  -2   18.35    0.82
   3  -5  -2   16.82    0.57
   3  -5  -2   17.90    0.61
  -3  -5   2   16.29    0.59
  -3  -5   2   18.28    0.58
   3   5  -1   15.17    0.47
   3   5  -1   15.11    0.71
  -3   5   1   14.38    0.50
  -3   5   1   14.89    0.52
   3   5  -1   14.24    0.49
   3  -5  -1   13.90    0.48
  -3  -5   1   14.85    0.49
  -3  -5   1   13.91    0.50
   3  -5  -1   14.67    0.54
   3  -5  -1   14.13    0.52
  -3   5   0    3.79    0.18
   3   5   0    3.50    0.13
  -3   5   0    3.61    0.19
   3   5   0    3.43    0.16
  -3  -5   0    3.63    0.16
   3  -5   0    3.29    0.18
   3  -5   0    3.54    0.16
  -3  -5   0    3.36    0.18
   3   5   1   68.09    2.13
  -3   5  -1   69.54    2.15
   3   5   1   69.62    2.11
  -3   5  -1   67.43    2.18
  -3  -5  -1   72.76    2.15
   3  -5   1   67.19    2.32
  -3  -5  -1   68.56    2.17
   3  -5   1   66.76    2.17
  -3   5  -2   73.00    2.32
  -3   5  -2   76.23    2.30
   3   5   2   74.09    2.25
   3   5   2   69.91    2.28
  -3  -5  -2   74.02    2.30
   3  -5   2   75.96    2.24
   3  -5   2   70.57    2.48
   3  -5   2   74.22    2.32
  -3   5  -3  189.91    6.24
   3   5   3  197.96    6.51
   3   5   3  190.30    6.21
   3   5   3  207.17    6.11
  -3   5  -3  210.39    6.23
  -3  -5  -3  200.19    6.23
   3  -5   3  209.44    6.11
   3  -5   3  197.74    6.25
   3  -5   3  204.83    6.51
  -3  -5  -3  208.96    6.23
   3   5   4    2.11    0.13
   3   5   4    2.00    0.12
  -3   5  -4    2.38    0.15
   3  -5   4    2.20    0.12
   3  -5   4    2.26    0.12
  -3  -5  -4    2.10    0.14
   3   5   5   11.73    0.42
  -3   5  -5   11.47    0.44
   3   5   5   11.18    0.40
   3  -5   5   11.06    0.40
  -3  -5  -5   11.18    0.44
   3  -5   5   10.79    0.40
   3   5   6   22.77    0.75
   3   5   6   22.51    0.70
   3   5   6   23.24    0.80
  -3  -5  -6   21.82    0.80
   3  -5   6   23.25    0.76
   3   5   7   14.75    0.52
   3   5   7   14.65    0.54
   3  -5   7   14.53    0.53
   3   5   8    9.51    0.38
   3   5   8    9.35    0.39
   3  -5   8    9.01    0.38
   3   5   9    0.12    0.09
  -3   5  -9    0.26    0.09
   3  -5   9    0.11    0.09
   3   5  10    2.05    0.18
  -3   5 -10    1.94    0.17
  -3   5 -10    1.74    0.18
   3  -5  10    2.04    0.20
  -3  -5 -10    2.05    0.19
  -3   5 -11    6.62    0.36
   3   5  11    7.06    0.34
  -3   5 -11    6.95    0.34
   3  -5  11    6.85    0.37
  -3  -5 -11    7.88    0.35
  -3   5 -12    0.09    0.13
  -3   5 -12    0.29    0.10
  -3   5 -12    0.34    0.13
  -3  -5 -12    0.16    0.11
  -3   5 -13    0.95    0.16
  -3   5 -13    1.15    0.13
  -3   5 -13    0.73    0.16
  -3  -5 -13    1.23    0.16
  -3   5 -14    2.36    0.20
  -3   5 -14    2.63    0.23
  -3  -5 -14    2.67    0.20
  -3   5 -15    0.26    0.09
  -3   5 -15   -0.01    0.09
  -3  -5 -15    0.30    0.09
   3   6 -15    1.36    0.12
   3  -6 -15    1.50    0.14
   3   6 -14    5.47    0.27
   3  -6 -14    5.67    0.30
   3  -6 -14    5.42    0.30
   3   6 -13    0.48    0.14
   3   6 -13    0.53    0.12
   3  -6 -13    0.54    0.14
   3  -6 -13    0.56    0.13
   3   6 -12    0.14    0.10
   3   6 -12    0.10    0.12
   3  -6 -12    0.31    0.13
   3  -6 -12    0.08    0.10
   3   6 -11    2.07    0.21
   3   6 -11    1.91    0.17
   3   6 -11    2.02    0.22
  -3  -6  11    1.97    0.18
   3  -6 -11    1.95    0.20
   3  -6 -11    1.96    0.21
   3   6 -10    0.93    0.13
   3   6 -10    0.81    0.14
   3   6 -10    1.07    0.17
   3  -6 -10    0.86    0.14
   3  -6 -10    0.82    0.15
  -3  -6  10    0.82    0.13
  -3  -6   9    7.97    0.35
   3  -6  -8    5.03    0.25
  -3  -6   8    4.83    0.25
   3  -6  -7    1.54    0.14
  -3  -6   7    1.90    0.15
  -3  -6   7    1.60    0.17
   3  -6  -7    1.79    0.12
  -3   6   6  130.96    4.24
   3  -6  -6  136.89    4.52
  -3  -6   6  135.60    4.24
   3  -6  -6  132.36    3.90
  -3  -6   6  139.24    4.14
  -3   6   5    0.54    0.10
  -3   6   5    0.59    0.08
  -3  -6   5    0.45    0.09
   3  -6  -5    0.54    0.08
  -3   6   4   90.19    2.94
   3   6  -4   97.53    3.84
  -3   6   4   90.68    3.05
  -3  -6   4   93.82    2.93
   3  -6  -4   94.92    3.14
  -3   6   3    1.29    0.11
   3   6  -3    1.14    0.11
  -3   6   3    1.17    0.13
  -3   6   3    0.96    0.09
   3   6  -3    1.18    0.18
  -3  -6   3    1.36    0.12
  -3  -6   3    1.20    0.11
   3  -6  -3    1.23    0.10
  -3   6   2    0.46    0.07
  -3   6   2    0.55    0.09
   3   6  -2    0.47    0.07
  -3   6   2    0.58    0.10
   3   6  -2    0.48    0.14
   3   6  -2    0.66    0.07
   3  -6  -2    0.40    0.06
  -3  -6   2    0.57    0.08
  -3  -6   2    0.50    0.07
   3  -6  -2    0.41    0.06
   3   6  -1   42.74    1.81
  -3   6   1   39.80    1.37
  -3   6   1   40.16    1.41
   3   6  -1   43.64    1.33
   3   6  -1   42.74    1.34
  -3   6   1   43.11    1.38
  -3  -6   1   42.84    1.36
   3  -6  -1   41.99    1.35
  -3  -6   1   42.74    1.37
   3  -6  -1   43.17    1.46
   3   6   0    3.28    0.14
  -3   6   0    2.96    0.15
   3   6   0    3.27    0.16
  -3   6   0    3.25    0.19
  -3   6   0    3.13    0.19
  -3  -6   0    3.36    0.18
  -3  -6   0    3.03    0.17
   3  -6   0    3.29    0.17
   3  -6   0    3.17    0.17
   3   6   1   23.44    0.77
  -3   6  -1   24.43    0.80
   3   6   1   24.58    0.83
   3   6   1   22.85    0.77
  -3   6  -1   24.22    0.83
   3  -6   1   24.35    0.81
  -3  -6  -1   24.82    0.80
   3  -6   1   23.98    0.85
  -3  -6  -1   24.00    0.81
  -3   6  -2    0.76    0.09
   3   6   2    0.73    0.08
   3   6   2    0.86    0.08
   3   6   2    0.94    0.08
  -3   6  -2    0.90    0.11
   3  -6   2    0.94    0.11
  -3  -6  -2    0.93    0.09
   3  -6   2    1.10    0.08
   3  -6   2    0.93    0.09
   3   6   3    0.46    0.07
   3   6   3    0.58    0.07
  -3   6  -3    0.44    0.08
  -3   6  -3    0.49    0.09
   3  -6   3    0.56    0.07
  -3  -6  -3    0.43    0.08
   3  -6   3    0.47    0.06
   3   6   4  159.80    5.37
   3   6   4  167.98    5.04
  -3   6  -4  168.30    5.15
   3  -6   4  169.76    5.04
   3  -6   4  166.42    5.36
  -3  -6  -4  162.15    5.16
   3   6   5    2.48    0.14
  -3   6  -5    2.33    0.17
   3   6   5    2.32    0.15
  -3  -6  -5    2.42    0.17
   3  -6   5    2.55    0.15
   3  -6   5    2.50    0.13
   3   6   6   17.99    0.61
   3   6   6   17.81    0.65
   3  -6   6   18.28    0.63
   3   6   7    2.97    0.18
   3   6   7    2.77    0.18
   3  -6   7    2.55    0.19
   3   6   8    5.40    0.26
   3   6   8    5.45    0.27
   3  -6   8    5.00    0.27
   3   6   9    1.75    0.16
  -3   6  -9    1.90    0.15
  -3   6  -9    1.99    0.18
   3  -6   9    2.08    0.20
   3   6  10    1.79    0.18
   3   6  10    1.96    0.18
  -3   6 -10    1.90    0.18
  -3   6 -10    1.96    0.17
  -3  -6 -10    1.86    0.17
   3  -6  10    1.84    0.20
  -3   6 -11    1.66    0.17
  -3   6 -11    1.74    0.19
   3   6  11    1.90    0.20
  -3  -6 -11    1.49    0.16
  -3   6 -12    1.06    0.15
  -3   6 -12    0.93    0.17
  -3  -6 -12    1.29    0.15
  -3   6 -13    0.28    0.14
  -3   6 -13    0.45    0.14
  -3  -6 -13    0.33    0.12
  -3   6 -14    8.36    0.39
  -3   6 -14    8.77    0.38
  -3  -6 -14    9.56    0.39
  -3   6 -15    0.21    0.09
  -3   6 -15    0.39    0.09
  -3  -6 -15    0.47    0.09
   3   7 -15    0.03    0.07
   3  -7 -15    0.32    0.09
   3   7 -14    0.50    0.11
   3   7 -14    0.46    0.10
   3  -7 -14    0.44    0.12
   3  -7 -14    0.53    0.12
   3   7 -13    7.51    0.35
   3   7 -13    8.11    0.37
   3  -7 -13    7.91    0.40
   3  -7 -13    7.47    0.37
   3   7 -12    0.33    0.13
   3   7 -12    0.22    0.10
   3   7 -12    0.25    0.13
   3  -7 -12    0.21    0.12
   3  -7 -12    0.17    0.13
   3   7 -11    2.40    0.20
   3   7 -11    2.14    0.20
   3   7 -11    2.14    0.22
   3  -7 -11    1.86    0.20
  -3  -7  11    2.08    0.19
   3  -7 -11    2.05    0.22
   3   7 -10    0.35    0.10
   3   7 -10    0.46    0.13
   3   7 -10    1.00    0.16
   3  -7 -10    0.27    0.13
  -3  -7  10    0.59    0.12
   3  -7 -10    0.37    0.11
   3   7  -9   33.72    1.13
   3  -7  -9   32.32    1.34
  -3  -7   9   34.25    1.12
  -3  -7   8   22.95    0.78
   3  -7  -8   22.14    0.83
   3  -7  -7   34.38    1.06
   3  -7  -7   38.01    1.31
  -3  -7   7   38.40    1.21
   3  -7  -7   37.81    1.13
  -3   7   6    9.18    0.41
  -3   7   6    9.70    0.37
   3  -7  -6    9.19    0.34
  -3  -7   6    9.53    0.37
  -3  -7   6    9.55    0.41
   3  -7  -6    9.82    0.39
  -3   7   5    8.33    0.35
   3   7  -5    9.17    0.54
  -3   7   5    9.10    0.38
   3  -7  -5    8.07    0.30
  -3  -7   5    9.06    0.37
   3  -7  -5    9.13    0.36
   3   7  -4   75.05    3.04
  -3   7   4   68.57    2.32
  -3   7   4   72.12    2.39
   3  -7  -4   73.49    2.45
  -3  -7   4   73.37    2.30
  -3   7   3   55.80    1.83
  -3   7   3   52.33    1.78
   3   7  -3   54.35    2.32
  -3  -7   3   56.07    1.76
   3  -7  -3   56.28    1.87
  -3   7   2   40.65    1.33
   3   7  -2   41.69    1.28
   3   7  -2   41.30    1.76
  -3   7   2   38.51    1.37
  -3   7   2   41.45    1.34
   3   7  -2   40.20    1.32
  -3  -7   2   41.83    1.32
   3  -7  -2   39.26    1.31
   3  -7  -2   43.22    1.40
  -3  -7   2   39.37    1.33
  -3   7   1   42.14    1.31
  -3   7   1   37.77    1.30
  -3   7   1   36.91    1.33
   3   7  -1   37.90    1.27
   3   7  -1   41.42    1.25
   3   7  -1   41.78    1.72
  -3  -7   1   40.11    1.30
   3  -7  -1   40.15    1.37
  -3  -7   1   39.90    1.30
  -3   7   0   40.08    1.37
  -3   7   0   40.39    1.38
   3   7   0   40.98    1.32
  -3   7   0   42.17    1.36
   3   7   0   45.96    1.40
   3   7   0   41.45    1.30
   3  -7   0   42.61    1.43
   3  -7   0   39.51    1.35
  -3  -7   0   40.86    1.35
  -3  -7   0   41.86    1.35
  -3   7  -1   56.71    1.80
  -3   7  -1   54.97    1.82
   3   7   1   56.10    1.78
   3   7   1   57.67    1.86
   3   7   1   57.38    1.75
  -3   7  -1   54.95    1.85
   3  -7   1   56.89    1.92
  -3  -7  -1   54.82    1.81
  -3  -7  -1   55.39    1.80
   3  -7   1   58.02    1.81
  -3   7  -2   35.12    1.12
   3   7   2   35.65    1.15
  -3   7  -2   29.79    1.12
   3   7   2   34.11    1.07
   3  -7   2   33.48    1.17
   3  -7   2   34.76    1.14
   3   7   3   51.18    1.71
   3   7   3   51.37    1.59
  -3   7  -3   52.19    1.65
   3  -7   3   51.40    1.60
  -3  -7  -3   50.52    1.66
  -3   7  -4   11.15    0.44
   3   7   4   11.78    0.43
   3   7   4   11.44    0.40
   3  -7   4   11.11    0.41
  -3  -7  -4   11.52    0.45
   3   7   5    7.18    0.28
  -3   7  -5    7.29    0.33
   3   7   5    7.18    0.30
   3   7   5    7.45    0.26
   3  -7   5    6.84    0.29
  -3  -7  -5    6.62    0.32
   3   7   6   48.64    1.63
   3   7   6   48.67    1.53
   3  -7   6   48.29    1.55
   3   7   7   24.55    0.81
   3   7   7   24.36    0.87
   3  -7   7   23.90    0.84
   3   7   8    0.04    0.08
   3   7   8    0.04    0.08
   3  -7   8    0.16    0.10
   3   7   9    2.67    0.20
  -3   7  -9    2.90    0.21
   3   7   9    2.71    0.21
  -3   7  -9    2.83    0.22
  -3  -7  -9    2.61    0.21
   3  -7   9    2.85    0.23
   3   7  10    0.74    0.13
  -3   7 -10    0.75    0.13
   3   7  10    0.88    0.13
  -3   7 -10    0.97    0.15
   3  -7  10    0.92    0.16
  -3  -7 -10    0.80    0.13
  -3   7 -11    1.19    0.17
  -3   7 -11    1.30    0.16
  -3  -7 -11    1.42    0.16
  -3   7 -12    2.99    0.25
  -3   7 -12    2.52    0.21
  -3  -7 -12    2.86    0.24
  -3   7 -13    9.05    0.40
  -3   7 -13    8.49    0.41
  -3  -7 -13    8.66    0.39
  -3   7 -14    0.96    0.14
  -3   7 -14    1.05    0.14
  -3  -7 -14    1.04    0.13
  -3   7 -15   -0.02    0.08
  -3  -7 -15    0.05    0.08
   3   8 -15    4.06    0.20
   3  -8 -15    4.56    0.21
   3   8 -14    4.48    0.24
   3   8 -14    4.86    0.25
   3  -8 -14    4.96    0.28
   3  -8 -14    5.05    0.26
   3   8 -13    0.92    0.13
   3   8 -13    1.30    0.16
   3   8 -13    1.19    0.15
   3  -8 -13    1.10    0.16
   3  -8 -13    0.97    0.15
   3   8 -12    3.62    0.27
   3   8 -12    3.90    0.24
   3   8 -12    3.93    0.27
   3  -8 -12    3.69    0.28
   3  -8 -12    3.72    0.27
   3   8 -11    1.20    0.17
   3   8 -11    1.05    0.16
   3   8 -11    0.96    0.13
   3  -8 -11    0.91    0.15
   3  -8 -11    1.03    0.16
   3   8 -10    0.33    0.12
   3   8 -10    0.21    0.13
   3   8 -10    0.32    0.12
   3   8 -10    0.19    0.09
   3  -8 -10    0.09    0.12
  -3  -8  10    0.32    0.11
   3  -8 -10    0.11    0.11
   3   8  -9   19.98    0.74
   3   8  -9   19.13    0.73
   3   8  -9   18.41    0.68
   3  -8  -9   17.65    0.62
  -3  -8   9   19.42    0.69
   3  -8  -9   18.48    0.80
   3  -8  -8    2.91    0.19
  -3  -8   8    2.74    0.21
   3  -8  -7    4.75    0.19
   3  -8  -7    5.25    0.26
  -3  -8   7    5.31    0.26
  -3   8   6   25.23    0.90
   3  -8  -6   25.05    0.80
   3  -8  -6   26.48    0.94
  -3  -8   6   26.23    0.87
  -3  -8   6   26.30    0.92
   3   8  -5  160.33    6.22
  -3   8   5  148.78    4.79
  -3   8   5  149.46    4.96
  -3  -8   5  155.59    4.78
   3  -8  -5  153.48    5.10
   3  -8  -5  147.25    4.40
  -3   8   4   43.10    1.49
   3   8  -4   45.37    1.97
  -3   8   4   45.89    1.51
   3  -8  -4   46.00    1.56
  -3  -8   4   44.74    1.48
   3   8  -3    4.91    0.36
  -3   8   3    4.53    0.25
  -3   8   3    4.19    0.22
   3  -8  -3    4.67    0.23
  -3  -8   3    4.43    0.23
   3   8  -2   13.07    0.68
  -3   8   2   12.61    0.50
  -3   8   2   11.80    0.48
   3   8  -2   13.51    0.45
  -3  -8   2   13.38    0.49
   3  -8  -2   13.17    0.50
   3  -8  -2   12.64    0.49
   3   8  -1    7.46    0.44
  -3   8   1    7.66    0.33
   3   8  -1    7.19    0.30
  -3   8   1    6.28    0.30
   3   8  -1    7.31    0.28
   3  -8  -1    7.07    0.30
  -3  -8   1    7.42    0.32
  -3   8   0    0.71    0.10
   3   8   0    0.92    0.10
  -3   8   0    0.94    0.13
  -3   8   0    0.82    0.09
   3   8   0    0.79    0.09
  -3  -8   0    0.93    0.11
   3  -8   0    0.79    0.09
   3   8   1   47.72    1.49
  -3   8  -1   45.02    1.58
  -3   8  -1   48.66    1.56
   3   8   1   49.22    1.60
   3  -8   1   47.09    1.63
  -3  -8  -1   48.52    1.56
  -3   8  -2    0.98    0.11
   3   8   2    0.83    0.09
  -3   8  -2    1.03    0.09
   3   8   2    0.80    0.10
  -3   8  -2    1.03    0.12
   3  -8   2    0.83    0.08
   3  -8   2    0.79    0.09
  -3   8  -3   27.28    0.94
   3   8   3   29.79    0.97
   3   8   3   28.18    0.89
  -3   8  -3   28.17    0.95
   3  -8   3   26.20    0.89
  -3  -8  -3   27.00    0.95
   3   8   4   19.66    0.69
  -3   8  -4   18.84    0.66
   3   8   4   19.67    0.64
  -3   8  -4   19.61    0.69
  -3  -8  -4   18.75    0.70
   3  -8   4   18.14    0.65
   3   8   5   78.12    2.68
   3   8   5   78.62    2.36
   3   8   5   84.80    2.50
   3   8   5   84.24    2.68
   3  -8   5   79.79    2.52
  -3  -8  -5   79.26    2.60
   3   8   6   10.82    0.43
   3   8   6   10.20    0.39
   3  -8   6    9.98    0.41
   3   8   7    3.72    0.23
   3   8   7    3.57    0.21
   3  -8   7    3.84    0.24
   3   8   8    1.29    0.13
   3   8   8    1.20    0.15
   3  -8   8    1.09    0.15
   3   8   9    1.87    0.17
   3   8   9    1.77    0.18
  -3   8  -9    1.66    0.16
   3   8   9    1.39    0.16
  -3   8  -9    1.77    0.17
   3  -8   9    1.30    0.18
  -3  -8  -9    1.38    0.15
  -3   8 -10    1.43    0.18
  -3   8 -10    1.37    0.15
   3   8  10    1.26    0.15
   3   8  10    1.29    0.16
  -3  -8 -10    1.31    0.15
   3  -8  10    1.20    0.18
  -3   8 -11    5.39    0.30
  -3   8 -11    5.75    0.33
   3   8  11    5.14    0.30
  -3  -8 -11    4.87    0.30
  -3   8 -12    4.45    0.29
  -3   8 -12    4.24    0.30
  -3  -8 -12    4.07    0.27
  -3   8 -13   11.22    0.46
  -3   8 -13   10.48    0.48
  -3  -8 -13   11.82    0.47
  -3   8 -14    0.20    0.11
  -3   8 -14    0.30    0.11
  -3  -8 -14    0.26    0.10
  -3   8 -15    4.44    0.21
  -3  -8 -15    4.90    0.22
   3   9 -14    5.66    0.26
   3   9 -14    5.56    0.26
   3  -9 -14    5.84    0.26
   3  -9 -14    5.40    0.30
   3   9 -13    0.30    0.12
   3   9 -13    0.16    0.10
   3   9 -13    0.23    0.10
   3  -9 -13    0.20    0.11
   3  -9 -13   -0.06    0.11
   3   9 -12    3.28    0.24
   3   9 -12    3.33    0.23
   3   9 -12    3.32    0.25
   3  -9 -12    3.49    0.25
   3  -9 -12    3.21    0.28
   3   9 -11    1.30    0.15
   3   9 -11    1.52    0.17
   3   9 -11    1.48    0.18
   3  -9 -11    1.36    0.17
   3  -9 -11    1.26    0.18
   3   9 -10    1.87    0.20
   3   9 -10    1.71    0.19
   3   9 -10    1.86    0.17
   3   9 -10    1.90    0.18
  -3  -9  10    1.78    0.19
   3  -9 -10    1.57    0.20
   3  -9 -10    1.59    0.19
   3   9  -9    2.22    0.18
   3   9  -9    2.25    0.22
   3   9  -9    2.46    0.22
   3   9  -9    2.00    0.18
  -3  -9   9    2.29    0.21
   3  -9  -9    1.88    0.20
   3  -9  -9    2.02    0.17
  -3  -9   8   21.03    0.73
   3  -9  -8   18.87    0.76
   3  -9  -7   12.37    0.39
  -3  -9   7   13.10    0.49
   3  -9  -7   12.57    0.52
  -3   9   6   18.04    0.67
  -3  -9   6   18.42    0.65
   3  -9  -6   18.00    0.55
   3  -9  -6   18.92    0.70
  -3   9   5    0.34    0.08
   3   9  -5    0.44    0.11
  -3   9   5    0.30    0.11
  -3  -9   5    0.22    0.10
   3  -9  -5    0.33    0.07
   3  -9  -5    0.29    0.08
   3   9  -4   76.29    3.10
  -3   9   4   75.46    2.42
  -3   9   4   68.36    2.37
  -3  -9   4   75.49    2.36
   3  -9  -4   76.51    2.50
   3  -9  -4   67.93    2.14
  -3   9   3    2.16    0.15
  -3   9   3    1.75    0.17
   3   9  -3    2.08    0.27
  -3  -9   3    1.96    0.17
   3  -9  -3    1.79    0.16
  -3   9   2   19.12    0.69
  -3   9   2   20.15    0.71
   3   9  -2   21.14    0.95
   3   9  -2   15.74    0.68
  -3  -9   2   20.11    0.71
   3  -9  -2   19.97    0.71
   3   9  -1   27.07    1.07
  -3   9   1   30.65    1.07
   3   9  -1   31.80    1.00
  -3   9   1   31.78    1.06
  -3  -9   1   33.11    1.07
   3  -9  -1   32.36    1.09
   3   9   0    0.39    0.07
  -3   9   0    0.72    0.12
  -3   9   0    0.48    0.09
   3   9   0    0.38    0.09
  -3  -9   0    0.42    0.09
   3  -9   0    0.47    0.08
  -3   9  -1    1.75    0.17
   3   9   1    1.62    0.15
  -3   9  -1    2.00    0.15
   3   9   1    1.71    0.13
   3  -9   1    1.91    0.13
  -3  -9  -1    2.31    0.17
  -3   9  -2  104.16    3.45
  -3   9  -2  106.56    3.35
   3   9   2  106.18    3.48
   3   9   2  105.03    3.24
   3  -9   2  106.89    3.56
   3   9   3    0.64    0.08
  -3   9  -3    0.55    0.11
  -3   9  -3    0.71    0.09
   3   9   3    0.64    0.10
  -3  -9  -3    0.34    0.10
   3  -9   3    0.38    0.08
   3   9   4    0.33    0.09
  -3   9  -4    0.45    0.07
   3   9   4    0.35    0.07
   3   9   4    0.42    0.08
   3   9   4    0.34    0.08
   3  -9   4    0.33    0.09
  -3  -9  -4    0.43    0.11
   3   9   5   30.81    1.07
   3   9   5   30.29    0.94
   3   9   5   32.20    1.00
  -3   9  -5   29.88    1.04
   3   9   5   33.32    1.09
   3  -9   5   27.96    1.02
   3   9   6   24.15    0.81
   3   9   6   25.74    0.89
   3  -9   6   23.18    0.84
   3   9   7    1.81    0.17
   3   9   7    1.54    0.14
   3  -9   7    1.95    0.19
   3   9   8    3.70    0.22
  -3   9  -8    3.67    0.24
   3   9   8    3.42    0.24
  -3   9  -8    3.37    0.22
   3  -9   8    2.64    0.23
  -3   9  -9    2.55    0.21
  -3   9  -9    2.49    0.23
   3   9   9    3.00    0.23
   3   9   9    2.66    0.20
   3   9   9    2.72    0.23
  -3  -9  -9    2.55    0.22
  -3  -9  -9    2.86    0.22
   3  -9   9    2.74    0.25
   3   9  10    6.42    0.35
  -3   9 -10    6.70    0.35
  -3   9 -10    6.76    0.33
   3  -9  10    5.74    0.36
  -3  -9 -10    6.38    0.32
  -3   9 -11   -0.04    0.13
   3   9  11   -0.10    0.10
  -3   9 -11    0.01    0.12
  -3  -9 -11    0.07    0.11
  -3   9 -12    7.52    0.39
  -3   9 -12    7.88    0.38
  -3  -9 -12    8.02    0.37
  -3   9 -13    0.11    0.11
  -3   9 -13    0.13    0.12
  -3  -9 -13    0.16    0.11
  -3   9 -14    0.35    0.11
  -3   9 -14    0.27    0.10
  -3  -9 -14    0.23    0.10
  -3  -9 -15    0.57    0.08
   3  10 -14    2.46    0.16
   3  10 -14    2.34    0.17
   3 -10 -14    2.66    0.20
   3  10 -13    0.11    0.09
   3  10 -13    0.11    0.10
   3  10 -13    0.28    0.11
   3 -10 -13    0.16    0.12
   3 -10 -13    0.06    0.09
   3  10 -12    0.54    0.12
   3  10 -12    0.81    0.14
   3  10 -12    0.89    0.14
   3 -10 -12    0.64    0.12
   3 -10 -12    0.74    0.15
   3  10 -11    1.50    0.17
   3  10 -11    1.36    0.17
   3  10 -11    1.71    0.16
   3 -10 -11    1.44    0.19
   3  10 -10    0.66    0.14
   3  10 -10    0.31    0.10
   3  10 -10    0.52    0.14
   3  10 -10    0.54    0.13
  -3 -10  10    0.35    0.12
   3 -10 -10    0.53    0.15
   3  10  -9    1.04    0.15
   3  10  -9    0.77    0.12
   3  10  -9    1.05    0.16
   3  10  -9    1.37    0.17
   3 -10  -9    0.94    0.11
  -3 -10   9    0.90    0.14
   3 -10  -9    0.81    0.16
   3  10  -8   20.71    0.73
   3  10  -8   21.50    0.80
   3  10  -8   19.93    0.77
   3 -10  -8   19.34    0.78
  -3 -10   8   20.95    0.74
  -3  10   7   25.95    0.95
   3 -10  -7   26.36    0.99
   3 -10  -7   26.39    0.78
  -3 -10   7   28.22    0.92
  -3  10   6   25.54    0.94
   3 -10  -6   27.08    0.98
   3 -10  -6   25.56    0.77
  -3 -10   6   28.15    0.90
  -3  10   5  126.74    4.22
   3  10  -5  136.62    4.29
   3 -10  -5  132.73    4.36
  -3 -10   5  120.35    4.09
   3  10  -4    4.35    0.24
   3  10  -4    3.96    0.36
  -3  10   4    3.38    0.25
  -3  10   4    3.85    0.21
   3 -10  -4    3.79    0.18
  -3 -10   4    3.37    0.24
   3 -10  -4    4.14    0.24
   3  10  -3    1.28    0.15
  -3  10   3    0.93    0.11
  -3  10   3    1.04    0.14
   3  10  -3    1.08    0.22
  -3 -10   3    0.89    0.14
   3 -10  -3    1.09    0.13
   3 -10  -3    0.96    0.09
   3 -10  -3    0.99    0.11
  -3  10   2   23.97    0.85
  -3  10   2   23.39    0.83
   3  10  -2   23.81    0.86
   3  10  -2   23.92    1.12
   3 -10  -2   23.21    0.85
  -3 -10   2   23.74    0.86
  -3  10   1    0.45    0.09
   3  10  -1    0.48    0.07
  -3  10   1    0.66    0.12
   3  10  -1    0.34    0.09
  -3 -10   1    0.52    0.10
   3 -10  -1    0.68    0.09
   3  10   0    6.34    0.25
  -3  10   0    6.12    0.31
   3  10   0    4.68    0.28
  -3  10   0    5.98    0.28
  -3 -10   0    6.54    0.30
   3 -10   0    6.18    0.26
  -3  10  -1    0.26    0.08
  -3  10  -1    0.10    0.10
   3  10   1    0.36    0.10
   3  10   1    0.10    0.08
   3  10   1    0.27    0.07
  -3 -10  -1    0.33    0.09
   3 -10   1    0.27    0.07
   3  10   2   10.90    0.46
  -3  10  -2   11.37    0.44
  -3  10  -2   11.95    0.49
   3  10   2   11.60    0.41
   3  10   2   10.23    0.45
   3 -10   2   12.08    0.44
   3  10   3   46.75    1.62
  -3  10  -3   47.62    1.60
  -3  10  -3   47.29    1.60
   3  10   3   49.18    1.64
   3  10   3   48.88    1.50
  -3 -10  -3   45.96    1.59
   3  10   4   42.94    1.34
   3  10   4   46.84    1.42
   3  10   4   48.67    1.55
  -3  10  -4   45.85    1.51
   3  10   4   45.42    1.54
   3 -10   4   39.81    1.43
  -3 -10  -4   44.95    1.53
   3  10   5   98.37    3.31
   3  10   5  106.61    3.31
   3  10   5  100.70    3.07
   3 -10   5   92.71    3.09
   3  10   6    0.73    0.13
   3  10   6    0.80    0.11
   3 -10   6    0.88    0.13
   3  10   7    3.73    0.21
   3  10   7    3.70    0.25
   3 -10   7    3.35    0.25
  -3  10  -8   17.44    0.62
   3  10   8   17.03    0.68
   3  10   8   17.77    0.65
  -3  10  -8   17.91    0.66
  -3 -10  -8   16.72    0.74
   3 -10   8   16.57    0.66
  -3  10  -9    0.16    0.11
  -3  10  -9    0.50    0.14
   3  10   9    0.14    0.11
  -3 -10  -9    0.31    0.11
  -3 -10  -9    0.17    0.11
   3 -10   9    0.26    0.12
  -3  10 -10    1.43    0.19
   3  10  10    1.18    0.16
  -3  10 -10    1.14    0.16
  -3 -10 -10    1.21    0.17
  -3 -10 -10    1.50    0.16
  -3  10 -11    1.23    0.19
   3  10  11    1.12    0.16
  -3  10 -11    0.97    0.16
  -3 -10 -11    0.95    0.14
  -3  10 -12    0.27    0.13
  -3  10 -12    0.16    0.12
   3  10  12    0.08    0.10
  -3 -10 -12    0.27    0.11
  -3  10 -13    0.80    0.14
  -3  10 -13    0.70    0.13
  -3 -10 -13    1.04    0.13
  -3  10 -14    0.35    0.10
  -3  10 -14    0.47    0.11
  -3 -10 -14    0.54    0.10
   3  11 -14    0.15    0.08
   3  11 -14    0.06    0.08
   3  11 -14   -0.01    0.07
   3 -11 -14    0.08    0.09
   3  11 -13   18.13    0.64
   3  11 -13   17.30    0.62
   3  11 -13   17.01    0.65
   3 -11 -13   18.42    0.76
   3  11 -12    1.36    0.15
   3  11 -12    1.59    0.17
   3  11 -12    1.32    0.14
   3 -11 -12    1.22    0.18
   3  11 -11    1.18    0.14
   3  11 -11    1.35    0.16
   3  11 -11    1.13    0.15
   3  11 -11    1.35    0.17
   3 -11 -11    1.13    0.19
   3  11 -10   15.06    0.59
   3  11 -10   15.08    0.61
   3  11 -10   15.60    0.65
   3  11 -10   15.16    0.58
   3 -11 -10   14.89    0.71
   3  11  -9    0.32    0.12
   3  11  -9    0.26    0.11
   3  11  -9    0.30    0.14
   3  11  -9    0.20    0.09
  -3 -11   9    0.16    0.11
   3 -11  -9    0.12    0.09
   3 -11  -9    0.18    0.13
   3  11  -8   31.58    1.07
   3  11  -8   32.53    1.19
   3  11  -8   32.37    1.13
   3 -11  -8   30.30    1.17
   3 -11  -8   31.02    1.31
   3 -11  -8   32.05    0.98
  -3 -11   8   32.10    1.08
  -3  11   7   26.42    0.96
  -3 -11   7   27.02    0.92
   3 -11  -7   26.37    1.00
   3  11  -6    1.95    0.18
  -3  11   6    1.58    0.15
   3 -11  -6    1.46    0.10
   3 -11  -6    1.70    0.17
  -3 -11   6    1.99    0.17
   3  11  -5    8.58    0.39
  -3  11   5    8.34    0.37
   3 -11  -5    8.57    0.27
   3 -11  -5    8.91    0.40
  -3  11   4   10.14    0.41
   3  11  -4   10.27    0.43
   3 -11  -4    9.76    0.44
  -3 -11   4    9.70    0.46
   3  11  -3   57.14    2.44
  -3  11   3   56.04    1.88
  -3  11   3   55.19    1.88
   3  11  -3   59.55    1.93
   3 -11  -3   56.20    1.97
  -3 -11   3   55.63    1.88
   3 -11  -3   53.23    1.66
   3 -11  -3   57.91    1.95
   3  11  -2    6.11    0.31
  -3  11   2    6.20    0.33
  -3  11   2    6.65    0.30
   3  11  -2    7.38    0.47
   3  11  -2    7.36    0.33
  -3 -11   2    6.79    0.35
   3 -11  -2    6.67    0.25
   3 -11  -2    6.88    0.30
   3  11  -1    3.81    0.23
  -3  11   1    4.07    0.22
   3  11  -1    3.69    0.23
  -3  11   1    3.82    0.24
   3  11  -1    4.08    0.19
   3 -11  -1    4.22    0.21
  -3 -11   1    4.26    0.25
  -3  11   0   64.72    2.12
   3  11   0   58.77    2.14
   3  11   0   65.92    1.98
  -3  11   0   61.72    2.13
   3  11   0   61.64    2.15
  -3  11   0   66.90    2.08
  -3 -11   0   63.68    2.07
   3 -11   0   64.71    2.16
   3  11   1    6.50    0.31
  -3  11  -1    6.40    0.34
   3  11   1    6.26    0.26
   3  11   1    6.13    0.32
  -3  11  -1    6.38    0.31
  -3 -11  -1    6.77    0.32
   3 -11   1    6.18    0.27
   3  11   2    9.86    0.43
  -3  11  -2   10.67    0.43
   3  11   2   10.69    0.39
   3  11   2    9.80    0.44
  -3  11  -3  125.86    4.13
   3  11   3  126.71    4.18
   3  11   3  130.34    3.87
   3  11   3  124.66    4.17
  -3 -11  -3  123.17    4.01
   3  11   4    2.55    0.19
   3  11   4    2.58    0.22
   3  11   4    2.90    0.17
  -3  11  -4    2.55    0.19
   3  11   4    2.48    0.16
   3  11   5    1.45    0.15
   3  11   5    1.06    0.15
   3  11   5    1.07    0.12
   3 -11   5    1.33    0.15
   3  11   6    3.47    0.20
   3  11   6    3.46    0.26
   3 -11   6    3.52    0.23
   3  11   7   19.65    0.77
   3 -11   7   20.05    0.73
  -3  11  -8    7.91    0.42
   3  11   8    8.69    0.42
  -3  11  -8    7.94    0.36
  -3  11  -8    8.19    0.39
  -3 -11  -8    7.77    0.42
   3 -11   8    8.04    0.39
  -3  11  -9    2.82    0.25
   3  11   9    2.64    0.24
  -3  11  -9    2.42    0.23
  -3  11  -9    2.41    0.20
  -3 -11  -9    2.81    0.24
  -3 -11  -9    2.91    0.21
   3 -11   9    2.21    0.22
   3  11  10    9.36    0.45
  -3  11 -10    9.50    0.42
  -3  11 -10    9.21    0.46
  -3 -11 -10    9.80    0.41
  -3 -11 -10    9.43    0.48
  -3  11 -11    0.29    0.13
   3  11  11    0.39    0.12
  -3  11 -11    0.24    0.14
  -3 -11 -11    0.47    0.12
  -3  11 -12    0.81    0.15
  -3  11 -12    0.93    0.16
   3  11  12    0.95    0.14
  -3 -11 -12    0.93    0.13
  -3  11 -13    2.55    0.21
  -3  11 -13    2.30    0.20
  -3 -11 -13    2.45    0.19
  -3  11 -14    0.62    0.10
  -3  11 -14    0.59    0.10
  -3 -11 -14    0.79    0.09
   3  12 -14    4.41    0.21
   3  12 -14    4.48    0.21
   3 -12 -14    5.11    0.25
   3  12 -13    4.62    0.23
   3  12 -13    4.42    0.23
   3  12 -13    4.47    0.24
   3 -12 -13    4.29    0.28
   3  12 -12    0.31    0.11
   3  12 -12    0.31    0.11
   3  12 -12    0.39    0.10
   3 -12 -12    0.24    0.13
   3  12 -11    4.28    0.27
   3  12 -11    4.06    0.27
   3  12 -11    4.56    0.26
   3  12 -11    4.22    0.27
   3 -12 -11    4.22    0.33
   3  12 -10    0.86    0.14
   3  12 -10    0.82    0.15
   3  12 -10    0.85    0.13
   3  12 -10    0.68    0.14
   3 -12 -10    0.79    0.18
   3  12  -9    1.64    0.17
   3  12  -9    1.69    0.18
   3  12  -9    1.63    0.19
   3  12  -9    1.71    0.16
   3 -12  -9    1.44    0.20
  -3 -12   9    1.52    0.17
   3 -12  -9    1.73    0.14
   3  12  -8    0.38    0.11
   3  12  -8    0.44    0.12
   3  12  -8    0.56    0.11
   3  12  -8    0.35    0.14
   3 -12  -8    0.49    0.09
   3 -12  -8    0.42    0.14
  -3 -12   8    0.46    0.11
   3 -12  -8    0.59    0.12
   3  12  -7    1.14    0.16
   3  12  -7    0.99    0.13
   3  12  -7    1.14    0.15
  -3  12   7    1.14    0.15
  -3 -12   7    1.17    0.15
   3 -12  -7    1.12    0.16
   3 -12  -7    1.11    0.18
   3  12  -6   81.66    2.69
  -3  12   6   77.92    2.65
   3 -12  -6   78.17    2.75
  -3 -12   6   80.51    2.50
   3  12  -5    5.75    0.29
  -3  12   5    5.51    0.28
   3 -12  -5    5.54    0.31
   3 -12  -5    5.07    0.19
   3  12  -4   94.26    3.08
  -3  12   4   91.72    3.03
   3 -12  -4   91.43    3.14
   3 -12  -4   90.20    3.15
   3  12  -3   41.38    1.42
  -3  12   3   41.56    1.39
   3 -12  -3   41.36    1.43
  -3 -12   3   39.44    1.42
   3 -12  -3   39.86    1.46
   3  12  -2    0.55    0.10
  -3  12   2    0.68    0.10
  -3  12   2    0.72    0.09
  -3 -12   2    0.67    0.12
   3 -12  -2    0.75    0.10
  -3  12   1   13.21    0.50
   3  12  -1   13.01    0.52
  -3  12   1   12.45    0.49
   3  12  -1   13.18    0.52
   3  12  -1   13.35    0.46
  -3 -12   1   12.81    0.53
   3 -12  -1   12.65    0.49
   3  12   0    0.70    0.12
  -3  12   0    0.70    0.11
  -3  12   0    0.54    0.10
   3  12   0    0.82    0.12
   3  12   0    0.66    0.09
   3 -12   0    0.71    0.09
  -3 -12   0    0.67    0.12
  -3  12  -1   36.90    1.29
  -3  12  -1   37.72    1.28
   3  12   1   36.46    1.30
   3  12   1   35.93    1.18
   3  12   1   36.98    1.30
  -3 -12  -1   37.08    1.27
   3 -12   1   37.32    1.28
  -3  12  -2    0.72    0.12
   3  12   2    0.64    0.12
   3  12   2    0.67    0.12
   3  12   2    0.62    0.09
  -3  12  -2    0.75    0.12
   3  12   3    0.31    0.08
   3  12   3    0.23    0.10
  -3  12  -3    0.30    0.10
   3  12   3    0.29    0.10
  -3  12  -4  137.39    4.58
   3  12   4  141.80    4.63
   3  12   4  139.79    4.61
   3  12   4  139.79    4.29
   3  12   5    0.34    0.09
   3  12   5    0.14    0.09
   3  12   5    0.21    0.12
   3  12   6   44.18    1.56
  -3  12  -7    8.52    0.43
  -3  12  -7    7.87    0.36
  -3  12  -7    8.55    0.39
   3  12   7    8.43    0.43
  -3 -12  -7    8.67    0.43
   3  12   8    3.84    0.29
  -3  12  -8    4.04    0.30
  -3  12  -8    4.23    0.28
  -3  12  -8    4.06    0.25
  -3 -12  -8    3.22    0.27
   3 -12   8    3.79    0.26
  -3  12  -9    0.91    0.17
   3  12   9    0.91    0.17
  -3  12  -9    0.63    0.14
  -3  12  -9    0.94    0.16
  -3 -12  -9    1.06    0.16
   3 -12   9    0.89    0.16
  -3 -12  -9    1.19    0.14
  -3  12 -10    2.86    0.25
  -3  12 -10    3.00    0.25
   3  12  10    2.96    0.27
  -3 -12 -10    3.31    0.22
  -3 -12 -10    2.86    0.27
  -3  12 -11    3.15    0.25
   3  12  11    3.46    0.27
  -3  12 -11    3.15    0.27
  -3 -12 -11    3.32    0.27
  -3 -12 -11    3.72    0.23
  -3  12 -12    0.11    0.12
  -3  12 -12   -0.01    0.11
   3  12  12    0.07    0.10
  -3 -12 -12    0.13    0.09
  -3  12 -13    0.27    0.11
  -3  12 -13    0.16    0.10
  -3 -12 -13    0.35    0.09
  -3  12 -14    5.24    0.23
  -3  12 -14    4.78    0.23
  -3 -12 -14    5.91    0.23
   3  13 -14    1.64    0.12
   3 -13 -14    1.57    0.15
   3  13 -13    0.27    0.09
   3  13 -13    0.45    0.09
   3 -13 -13    0.46    0.12
   3  13 -12    2.60    0.21
   3  13 -12    2.59    0.20
   3 -13 -12    2.50    0.25
   3  13 -11    0.80    0.13
   3  13 -11    0.87    0.13
   3  13 -11    0.73    0.13
   3  13 -11    1.15    0.15
   3 -13 -11    0.91    0.18
  -3 -13  11    0.88    0.13
   3  13 -10   16.39    0.65
   3  13 -10   16.28    0.60
   3  13 -10   15.75    0.62
   3  13 -10   15.29    0.61
   3 -13 -10   14.49    0.72
   3  13  -9    8.09    0.39
   3  13  -9    8.55    0.41
   3  13  -9    8.24    0.38
   3 -13  -9    7.56    0.45
   3 -13  -9    7.75    0.31
   3  13  -8   10.87    0.49
   3  13  -8   10.80    0.46
   3  13  -8   10.77    0.44
   3 -13  -8   10.59    0.38
   3 -13  -8    9.05    0.53
  -3 -13   8   10.23    0.44
  -3  13   7   13.65    0.55
   3  13  -7   13.05    0.52
   3  13  -7   14.00    0.59
   3 -13  -7   12.61    0.63
  -3 -13   7   14.14    0.52
   3 -13  -7   13.47    0.59
   3 -13  -7   13.10    0.45
  -3  13   6   15.04    0.59
   3  13  -6   13.98    0.54
   3  13  -6   14.90    0.59
   3  13  -6   14.01    0.61
   3 -13  -6   14.52    0.60
  -3 -13   6   15.23    0.55
   3 -13  -6   15.06    0.63
  -3  13   5    0.96    0.13
   3  13  -5    0.99    0.13
   3 -13  -5    0.94    0.13
   3 -13  -5    0.65    0.14
   3  13  -4   54.56    1.84
  -3  13   4   53.64    1.81
   3 -13  -4   53.38    1.88
   3 -13  -4   53.26    1.90
   3  13  -3   48.83    1.67
  -3  13   3   48.36    1.64
   3 -13  -3   48.26    1.73
  -3  13   2    2.86    0.18
  -3  13   2    2.36    0.16
   3  13  -2    2.81    0.20
  -3 -13   2    2.75    0.26
   3  13  -1   18.57    0.67
  -3  13   1   17.29    0.64
  -3  13   1   16.51    0.64
   3  13  -1   17.56    0.66
  -3 -13   1   16.76    0.68
   3  13   0   23.13    0.81
  -3  13   0   21.23    0.78
   3  13   0   21.10    0.80
   3  13   0   22.10    0.72
  -3  13   0   21.79    0.79
  -3 -13   0   20.28    0.80
  -3  13  -1   38.77    1.35
   3  13   1   38.11    1.38
  -3  13  -1   39.39    1.37
   3  13   1   40.77    1.38
   3  13   1   39.22    1.25
  -3  13  -2   42.12    1.46
   3  13   2   41.36    1.47
  -3  13  -2   41.80    1.44
   3  13   2   42.71    1.47
   3  13   2   41.32    1.34
  -3  13  -3   38.82    1.36
  -3  13  -3   38.71    1.39
   3  13   3   39.18    1.40
   3  13   3   41.79    1.41
   3  13   3   39.09    1.27
   3  13   4    7.55    0.37
  -3  13  -4    6.87    0.33
  -3  13  -4    6.95    0.36
   3  13   4    6.47    0.35
   3  13   5    3.53    0.25
   3  13   5    3.96    0.29
  -3  13  -5    3.75    0.27
  -3  13  -6   15.93    0.64
   3  13   6   14.79    0.65
   3  13   7   20.37    0.76
  -3  13  -7   20.77    0.75
   3  13   7   21.57    0.85
  -3  13  -7   22.39    0.84
  -3  13  -7   21.00    0.80
  -3 -13  -7   21.90    0.91
  -3  13  -8    1.31    0.18
   3  13   8    1.18    0.19
  -3  13  -8    1.28    0.18
  -3  13  -8    1.70    0.18
  -3 -13  -8    1.62    0.19
   3  13   9    2.96    0.28
  -3  13  -9    3.74    0.27
  -3  13  -9    3.69    0.28
  -3  13  -9    3.20    0.26
  -3 -13  -9    3.43    0.28
  -3 -13  -9    3.52    0.22
  -3  13 -10    1.97    0.19
   3  13  10    2.58    0.23
  -3  13 -10    2.22    0.22
  -3 -13 -10    2.52    0.20
  -3 -13 -10    2.23    0.22
  -3  13 -11    1.60    0.17
  -3  13 -11    1.60    0.19
   3  13  11    1.66    0.18
  -3 -13 -11    2.01    0.17
  -3 -13 -11    1.68    0.19
   3  13  12    1.86    0.17
  -3  13 -12    1.42    0.16
  -3  13 -12    1.48    0.15
  -3 -13 -12    1.86    0.16
  -3  13 -13    1.77    0.15
  -3  13 -13    1.65    0.14
  -3 -13 -13    1.84    0.14
   3  14 -13    0.40    0.09
   3  14 -13    0.41    0.09
   3 -14 -13    0.31    0.10
   3  14 -12    1.25    0.13
   3  14 -12    1.42    0.14
   3 -14 -12    2.04    0.21
   3  14 -11    1.05    0.13
   3  14 -11    1.07    0.15
   3  14 -11    1.05    0.14
  -3 -14  11    1.02    0.12
   3 -14 -11    1.19    0.18
   3  14 -10    0.08    0.11
   3  14 -10    0.06    0.11
   3  14 -10    0.17    0.10
   3 -14 -10    0.02    0.13
  -3 -14  10    0.02    0.10
   3  14  -9    7.38    0.37
   3  14  -9    7.30    0.38
   3  14  -9    7.22    0.35
   3 -14  -9    7.42    0.44
   3  14  -8   17.78    0.69
   3  14  -8   17.48    0.63
   3  14  -8   17.24    0.66
   3 -14  -8   15.43    0.76
   3 -14  -8   16.92    0.55
  -3 -14   8   15.44    0.61
   3  14  -7    0.92    0.15
  -3  14   7    1.05    0.15
   3  14  -7    1.13    0.15
   3  14  -7    1.00    0.14
   3 -14  -7    1.05    0.17
   3 -14  -7    1.07    0.10
   3 -14  -7    1.21    0.18
  -3 -14   7    0.90    0.13
   3  14  -6    8.13    0.39
  -3  14   6    8.24    0.37
   3  14  -6    7.49    0.34
   3  14  -6    7.87    0.37
   3  14  -6    7.82    0.36
   3 -14  -6    7.41    0.42
   3 -14  -6    7.43    0.41
  -3 -14   6    7.70    0.34
  -3  14   5   37.02    1.28
   3  14  -5   37.25    1.35
   3  14  -5   37.16    1.30
   3 -14  -5   35.11    1.35
   3  14  -4   10.70    0.45
  -3  14   4   10.86    0.44
   3 -14  -4   10.06    0.49
  -3  14   3    4.93    0.26
   3  14  -3    4.95    0.27
   3 -14  -3    5.16    0.30
   3  14  -2   22.59    0.81
  -3  14   2   20.80    0.78
  -3  14   2   21.79    0.79
   3  14  -1    0.35    0.10
   3  14  -1    0.36    0.09
  -3  14   1    0.30    0.09
  -3  14   1    0.33    0.09
  -3  14   0    2.27    0.18
  -3  14   0    2.21    0.18
   3  14   0    2.39    0.19
   3  14   0    2.54    0.19
   3  14   0    2.22    0.15
   3  14   1   25.57    0.86
   3  14   1   27.49    0.96
  -3  14  -1   26.24    0.94
  -3  14  -1   26.04    0.93
   3  14   1   25.30    0.96
   3  14   2   27.62    1.03
   3  14   2   29.67    1.04
  -3  14  -2   28.43    1.02
  -3  14  -2   27.48    1.00
  -3  14  -3   25.40    0.94
   3  14   3   28.11    0.99
  -3  14  -3   26.15    0.97
   3  14   3   26.13    0.98
   3  14   4    3.65    0.27
  -3  14  -4    3.58    0.22
  -3  14  -4    3.95    0.27
   3  14   4    3.32    0.25
   3  14   5   36.29    1.34
   3  14   5   37.99    1.37
  -3  14  -5   38.93    1.36
  -3  14  -6    4.42    0.25
  -3  14  -6    4.73    0.28
   3  14   6    4.40    0.31
  -3  14  -6    4.14    0.30
   3  14   6    4.54    0.24
  -3 -14  -6    4.75    0.29
   3 -14   6    4.02    0.25
  -3  14  -7    8.68    0.43
  -3  14  -7    8.33    0.37
   3  14   7    8.74    0.45
  -3  14  -7    7.63    0.39
   3  14   7    8.15    0.35
  -3 -14  -7    8.51    0.44
  -3  14  -8    1.01    0.15
   3  14   8    1.29    0.19
  -3  14  -8    0.66    0.15
  -3  14  -8    1.06    0.16
  -3 -14  -8    1.10    0.17
   3  14   9    0.45    0.15
  -3  14  -9    0.43    0.13
  -3  14  -9    0.42    0.13
  -3  14  -9    0.43    0.14
  -3 -14  -9    0.48    0.11
  -3 -14  -9    0.33    0.13
  -3  14 -10    0.79    0.16
  -3  14 -10    0.69    0.14
   3  14  10    0.59    0.14
  -3 -14 -10    1.16    0.12
  -3 -14 -10    0.77    0.15
  -3  14 -11    3.99    0.25
   3  14  11    4.11    0.27
  -3  14 -11    4.41    0.27
  -3 -14 -11    4.36    0.28
  -3 -14 -11    4.10    0.23
  -3  14 -12    0.02    0.10
  -3  14 -12    0.07    0.09
   3  14  12    0.09    0.09
  -3 -14 -12    0.09    0.08
  -3  14 -13    4.21    0.20
  -3  14 -13    4.25    0.22
  -3 -14 -13    4.45    0.19
   3  15 -13    0.25    0.07
   3  15 -13    0.34    0.08
   3 -15 -13    0.22    0.08
   3  15 -12    0.49    0.10
   3  15 -12    0.43    0.09
   3 -15 -12    0.68    0.13
   3  15 -11    5.73    0.29
   3  15 -11    5.60    0.27
   3 -15 -11    5.66    0.34
  -3 -15  11    5.42    0.28
   3  15 -10    0.53    0.12
   3  15 -10    0.47    0.13
   3  15 -10    0.44    0.11
   3 -15 -10    0.56    0.15
  -3 -15  10    0.43    0.11
   3  15  -9    7.07    0.36
   3  15  -9    7.53    0.37
   3  15  -9    7.41    0.35
   3 -15  -9    7.88    0.43
  -3 -15   9    6.97    0.36
   3  15  -8   29.63    1.07
   3  15  -8   27.91    0.97
   3  15  -8   28.59    1.02
   3 -15  -8   26.80    1.18
   3 -15  -8   28.41    0.88
   3  15  -7   15.26    0.56
   3  15  -7   15.60    0.62
   3  15  -7   14.92    0.59
  -3  15   7   15.13    0.60
   3 -15  -7   14.55    0.68
   3 -15  -7   14.90    0.49
  -3 -15   7   13.86    0.55
   3 -15  -7   13.24    0.63
   3  15  -6   18.67    0.75
   3  15  -6   19.02    0.71
   3  15  -6   19.67    0.74
  -3  15   6   19.64    0.73
   3  15  -6   17.91    0.67
   3 -15  -6   18.40    0.78
   3 -15  -6   19.36    0.83
   3 -15  -6   18.76    0.60
  -3 -15   6   18.47    0.67
   3  15  -5    0.60    0.11
   3  15  -5    0.58    0.11
   3  15  -5    0.48    0.12
   3  15  -5    0.58    0.12
  -3  15   5    0.54    0.11
  -3 -15   5    0.60    0.10
   3 -15  -5    0.71    0.14
   3 -15  -5    0.60    0.14
   3 -15  -5    0.64    0.12
  -3  15   4   34.45    1.22
   3  15  -4   34.19    1.24
   3  15  -4   35.75    1.27
   3 -15  -4   34.82    1.29
   3  15  -3    0.94    0.14
  -3  15   3    0.91    0.13
   3 -15  -3    0.98    0.15
   3  15  -2   24.42    0.92
  -3  15   2   23.54    0.89
  -3  15   2   25.80    0.90
   3 -15  -2   26.13    0.96
   3  15  -1   40.96    1.38
  -3  15   1   38.54    1.38
   3  15  -1   39.06    1.40
  -3  15   1   41.04    1.38
   3  15   0   20.27    0.79
  -3  15   0   20.92    0.76
   3  15   0   21.72    0.78
  -3  15   0   20.41    0.77
   3  15   1   11.62    0.50
  -3  15  -1   11.32    0.47
  -3  15  -1   12.23    0.49
   3  15   1   11.58    0.49
   3  15   2   67.11    2.22
  -3  15  -2   65.08    2.21
  -3  15  -2   63.44    2.18
   3  15   2   64.72    2.23
   3  15   3   14.57    0.61
   3  15   3   15.18    0.62
  -3  15  -3   14.62    0.58
  -3  15  -3   15.18    0.60
   3  15   4    2.11    0.21
  -3  15  -4    2.13    0.20
  -3  15  -4    2.26    0.19
   3  15   4    2.52    0.23
   3 -15   4    2.77    0.19
  -3  15  -5    9.12    0.44
   3  15   5    9.25    0.43
   3  15   5    9.38    0.45
   3 -15   5    8.77    0.40
  -3  15  -6   23.91    0.88
  -3  15  -6   22.50    0.84
   3  15   6   24.10    0.90
   3  15   6   21.42    0.80
  -3  15  -6   22.36    0.81
   3 -15   6   21.67    0.85
  -3 -15  -6   24.16    0.96
  -3  15  -7    2.06    0.19
  -3  15  -7    2.09    0.18
  -3  15  -7    1.89    0.21
   3  15   7    2.06    0.23
  -3 -15  -7    1.64    0.19
  -3  15  -8    3.98    0.29
  -3  15  -8    3.69    0.26
   3  15   8    4.26    0.31
  -3  15  -8    4.47    0.29
  -3 -15  -8    4.37    0.30
  -3  15  -9    9.36    0.43
  -3  15  -9    9.38    0.40
   3  15   9    8.69    0.45
  -3  15  -9    9.25    0.43
  -3 -15  -9    8.99    0.38
  -3 -15  -9    9.62    0.47
   3  15  10    3.72    0.27
  -3  15 -10    3.79    0.26
  -3  15 -10    3.78    0.24
  -3 -15 -10    3.64    0.28
  -3 -15 -10    3.67    0.21
   3  15  11    0.58    0.12
  -3  15 -11    0.55    0.13
  -3  15 -11    0.51    0.11
  -3 -15 -11    0.48    0.12
  -3 -15 -11    0.55    0.09
  -3  15 -12    2.06    0.18
  -3  15 -12    1.93    0.17
   3  15  12    2.14    0.18
  -3 -15 -12    2.36    0.18
  -3 -15 -12    2.33    0.15
  -3  15 -13   -0.02    0.06
  -3  15 -13   -0.09    0.07
   3  16 -13    0.28    0.07
   3  16 -13    0.24    0.06
   3 -16 -13    0.42    0.08
   3  16 -12    0.76    0.11
   3  16 -12    0.74    0.10
   3 -16 -12    1.07    0.13
   3  16 -11    1.09    0.12
   3  16 -11    1.11    0.14
  -3 -16  11    1.08    0.12
   3 -16 -11    1.39    0.16
   3  16 -10    2.63    0.20
   3  16 -10    2.74    0.21
  -3 -16  10    2.19    0.20
   3 -16 -10    2.30    0.24
   3  16  -9    0.41    0.11
   3  16  -9    0.34    0.12
   3  16  -9    0.36    0.11
  -3 -16   9    0.23    0.10
   3 -16  -9    0.27    0.13
   3  16  -8   13.88    0.53
   3  16  -8   13.77    0.58
   3  16  -8   14.49    0.57
   3 -16  -8   14.71    0.66
  -3 -16   8   13.36    0.58
   3 -16  -8   13.68    0.47
   3  16  -7   13.33    0.56
   3  16  -7   13.66    0.57
  -3  16   7   13.40    0.56
   3  16  -7   13.61    0.52
   3  16  -7   13.86    0.55
   3 -16  -7   13.79    0.45
   3 -16  -7   13.39    0.63
  -3 -16   7   13.67    0.57
  -3 -16   7   12.01    0.50
   3  16  -6    4.85    0.29
   3  16  -6    5.11    0.28
   3  16  -6    4.84    0.26
  -3  16   6    4.36    0.28
   3  16  -6    4.80    0.28
   3 -16  -6    4.64    0.31
   3 -16  -6    5.06    0.21
  -3 -16   6    4.32    0.28
  -3 -16   6    4.13    0.24
   3 -16  -6    4.51    0.30
   3  16  -5   21.87    0.77
   3  16  -5   22.62    0.84
   3  16  -5   22.86    0.82
   3  16  -5   23.40    0.86
  -3  16   5   22.66    0.83
   3 -16  -5   22.17    0.94
   3 -16  -5   22.41    0.89
   3 -16  -5   21.27    0.85
  -3 -16   5   21.90    0.85
  -3 -16   5   21.29    0.76
  -3  16   4    1.29    0.15
   3  16  -4    1.18    0.14
   3  16  -4    1.36    0.15
   3  16  -4    1.64    0.15
   3  16  -4    1.27    0.16
   3 -16  -4    1.42    0.16
  -3 -16   4    1.14    0.14
   3 -16  -4    1.38    0.17
   3 -16  -4    1.43    0.17
   3  16  -3    8.81    0.40
  -3  16   3    8.49    0.38
   3  16  -3    8.46    0.38
   3  16  -3    8.11    0.34
  -3 -16   3    8.55    0.38
   3 -16  -3    9.25    0.43
   3 -16  -3    8.13    0.39
  -3  16   2   30.77    1.13
  -3  16   2   32.24    1.13
   3  16  -2   32.83    1.16
   3 -16  -2   32.50    1.19
   3  16  -1    1.83    0.18
  -3  16   1    2.22    0.19
  -3  16   1    1.94    0.18
   3  16  -1    2.46    0.17
   3  16   0    6.36    0.30
   3  16   0    6.23    0.32
  -3  16   0    5.74    0.30
  -3  16   0    5.89    0.30
   3  16   1    6.00    0.32
  -3  16  -1    6.28    0.31
  -3  16  -1    6.17    0.31
   3  16   1    6.11    0.31
  -3  16  -2   11.10    0.47
  -3  16  -2   11.33    0.49
   3  16   2   11.58    0.50
   3  16   2   11.45    0.50
   3 -16   2   11.38    0.48
   3  16   3   10.12    0.45
  -3  16  -3    9.84    0.42
  -3  16  -3    9.90    0.44
   3  16   3   10.36    0.46
   3 -16   3    9.24    0.42
   3  16   4   18.56    0.73
  -3  16  -4   18.71    0.72
   3  16   4   18.58    0.72
   3 -16   4   16.82    0.70
  -3  16  -5   49.36    1.69
   3  16   5   49.42    1.70
   3  16   5   47.00    1.69
   3 -16   5   46.81    1.71
   3  16   6    7.88    0.41
  -3  16  -6    6.79    0.38
  -3  16  -6    7.55    0.36
   3 -16   6    6.78    0.34
  -3 -16  -6    7.64    0.39
  -3  16  -7   11.49    0.46
  -3  16  -7   11.73    0.49
  -3  16  -7   11.12    0.51
   3  16   7   11.85    0.53
   3 -16   7   10.74    0.47
  -3  16  -8   19.92    0.70
  -3  16  -8   19.86    0.76
  -3  16  -8   19.89    0.74
   3  16   8   19.68    0.79
  -3 -16  -8   18.61    0.70
  -3 -16  -8   19.55    0.84
  -3  16  -9    0.49    0.13
  -3  16  -9    0.46    0.12
   3  16   9    0.44    0.13
  -3  16  -9    0.51    0.12
  -3 -16  -9    0.57    0.13
  -3 -16  -9    0.67    0.10
  -3  16 -10    0.12    0.10
   3  16  10    0.12    0.10
  -3  16 -10    0.27    0.12
  -3 -16 -10    0.23    0.08
  -3 -16 -10    0.29    0.12
  -3  16 -11    0.95    0.12
   3  16  11    1.06    0.13
  -3  16 -11    1.00    0.14
  -3 -16 -11    1.04    0.14
  -3 -16 -11    0.96    0.10
  -3  16 -12    1.22    0.12
   3  16  12    1.27    0.12
  -3  16 -12    1.37    0.11
  -3 -16 -12    1.27    0.10
  -3 -16 -12    1.40    0.14
   3  17 -12    2.74    0.16
   3  17 -12    2.73    0.17
   3 -17 -12    2.88    0.19
   3  17 -11    0.11    0.08
   3  17 -11    0.20    0.09
  -3 -17  11    0.07    0.07
   3 -17 -11    0.31    0.10
   3  17 -10   13.23    0.49
   3  17 -10   13.18    0.52
   3 -17 -10   14.11    0.61
  -3 -17  10   13.15    0.53
   3  17  -9    6.55    0.32
   3  17  -9    6.63    0.31
  -3 -17   9    6.74    0.33
   3 -17  -9    6.42    0.37
   3  17  -8   10.12    0.44
   3  17  -8   10.15    0.42
   3 -17  -8   10.05    0.50
  -3 -17   8   10.01    0.45
   3  17  -7   25.11    0.90
   3  17  -7   24.18    0.85
  -3  17   7   24.94    0.92
   3  17  -7   24.07    0.92
   3  17  -7   25.30    0.94
   3 -17  -7   25.51    0.78
  -3 -17   7   24.83    0.94
   3 -17  -7   24.59    1.03
   3  17  -6    0.41    0.12
   3  17  -6    0.52    0.12
  -3  17   6    0.63    0.13
   3  17  -6    0.58    0.12
   3  17  -6    0.54    0.11
  -3 -17   6    0.47    0.12
   3 -17  -6    0.56    0.13
  -3 -17   6    0.44    0.10
   3  17  -5    0.22    0.10
   3  17  -5    0.38    0.10
  -3  17   5    0.15    0.10
   3  17  -5    0.32    0.11
   3  17  -5    0.31    0.11
   3 -17  -5    0.18    0.10
   3 -17  -5    0.38    0.11
   3 -17  -5    0.43    0.12
  -3 -17   5    0.30    0.10
   3  17  -4    0.94    0.13
   3  17  -4    1.36    0.16
   3  17  -4    0.96    0.12
  -3  17   4    0.94    0.13
  -3 -17   4    1.08    0.14
   3 -17  -4    1.06    0.16
   3 -17  -4    0.82    0.13
   3 -17  -4    1.05    0.15
   3  17  -3   19.48    0.67
   3  17  -3   18.78    0.74
  -3  17   3   19.39    0.72
   3  17  -3   18.58    0.70
   3 -17  -3   18.63    0.74
  -3 -17   3   19.15    0.73
   3 -17  -3   18.94    0.77
   3  17  -2   34.07    1.15
   3  17  -2   33.90    1.21
  -3  17   2   34.63    1.23
   3  17  -2   36.01    1.26
  -3  17   2   36.23    1.23
   3 -17  -2   36.14    1.30
   3 -17  -2   34.79    1.28
  -3 -17   2   35.07    1.27
   3  17  -1    5.02    0.29
   3  17  -1    4.94    0.26
  -3  17   1    5.13    0.28
  -3  17   1    4.98    0.27
   3 -17  -1    4.97    0.27
  -3 -17   1    4.84    0.26
   3  17   0   37.25    1.32
  -3  17   0   37.05    1.30
   3  17   0   37.11    1.30
  -3  17   0   38.06    1.29
   3 -17   0   36.22    1.34
  -3 -17   0   36.50    1.33
  -3  17  -1    1.07    0.14
  -3  17  -1    1.28    0.15
   3  17   1    1.29    0.16
   3  17   1    1.31    0.15
   3 -17   1    1.03    0.13
   3  17   2   17.74    0.72
  -3  17  -2   18.23    0.71
  -3  17  -2   17.99    0.68
   3  17   2   18.09    0.71
   3 -17   2   18.33    0.71
   3  17   3   16.59    0.67
  -3  17  -3   16.81    0.66
   3  17   3   16.91    0.67
  -3  17  -3   15.96    0.63
   3 -17   3   16.63    0.65
   3  17   4    0.39    0.12
  -3  17  -4    0.18    0.12
   3  17   4    0.44    0.12
   3 -17   4    0.40    0.10
   3  17   5   16.78    0.66
  -3  17  -5   16.57    0.65
   3 -17   5   14.45    0.62
  -3  17  -6    0.14    0.11
   3  17   6    0.21    0.11
  -3  17  -6    0.20    0.12
   3 -17   6    0.26    0.10
  -3 -17  -6    0.23    0.11
  -3  17  -7   12.70    0.54
  -3  17  -7   12.90    0.52
   3  17   7   12.22    0.56
   3 -17   7   12.45    0.52
  -3 -17  -7   13.06    0.58
  -3  17  -8   15.12    0.62
   3  17   8   14.81    0.64
  -3  17  -8   15.00    0.60
  -3  17  -8   15.60    0.57
  -3 -17  -8   16.41    0.69
   3  17   9    0.10    0.11
  -3  17  -9    0.11    0.10
  -3  17  -9    0.04    0.09
  -3  17  -9    0.04    0.11
  -3 -17  -9    0.18    0.08
  -3 -17  -9    0.21    0.11
  -3  17 -10    5.15    0.26
   3  17  10    5.74    0.30
  -3  17 -10    5.56    0.28
  -3 -17 -10    5.38    0.24
  -3 -17 -10    5.71    0.32
  -3  17 -11    1.22    0.13
  -3  17 -11    1.26    0.12
   3  17  11    1.33    0.13
  -3 -17 -11    1.79    0.16
  -3  17 -12    0.01    0.07
  -3  17 -12    0.09    0.06
   3  17  12    0.17    0.07
   3  18 -12    0.21    0.07
   3  18 -12    0.21    0.06
   3 -18 -12    0.21    0.07
   3  18 -11    2.26    0.16
   3  18 -11    2.17    0.15
   3 -18 -11    2.68    0.19
  -3 -18  11    2.11    0.14
   3  18 -10    0.21    0.10
   3  18 -10    0.28    0.09
  -3 -18  10    0.28    0.08
   3 -18 -10    0.49    0.11
   3  18  -9    6.67    0.31
   3  18  -9    6.21    0.29
  -3 -18   9    6.31    0.31
   3 -18  -9    6.30    0.35
   3  18  -8    0.01    0.11
   3  18  -8    0.15    0.10
  -3 -18   8    0.13    0.09
   3 -18  -8    0.06    0.11
   3  18  -7    4.78    0.28
   3  18  -7    4.88    0.26
  -3  18   7    4.56    0.28
   3  18  -7    4.80    0.28
   3 -18  -7    4.75    0.30
  -3 -18   7    4.38    0.28
  -3  18   6   52.95    1.85
   3  18  -6   53.76    1.87
   3  18  -6   53.73    1.74
   3  18  -6   55.42    1.83
   3 -18  -6   52.56    2.11
  -3 -18   6   55.76    1.92
   3  18  -5    1.16    0.16
   3  18  -5    1.43    0.16
   3  18  -5    1.41    0.14
  -3  18   5    1.17    0.16
   3 -18  -5    1.13    0.15
   3 -18  -5    1.32    0.16
  -3 -18   5    1.15    0.15
   3  18  -4   29.54    1.05
   3  18  -4   27.69    0.95
  -3  18   4   29.08    1.03
   3  18  -4   28.19    1.00
   3 -18  -4   28.01    1.08
  -3 -18   4   27.93    1.05
   3 -18  -4   27.84    1.06
   3 -18  -4   28.15    1.15
  -3  18   3   35.17    1.23
   3  18  -3   35.31    1.21
   3  18  -3   35.69    1.25
   3  18  -3   34.64    1.14
   3 -18  -3   33.71    1.28
  -3 -18   3   34.40    1.26
   3 -18  -3   33.96    1.27
   3  18  -2    0.72    0.12
   3  18  -2    0.62    0.12
  -3  18   2    0.60    0.12
  -3  18   2    0.60    0.12
   3 -18  -2    0.74    0.13
   3 -18  -2    0.60    0.12
  -3 -18   2    0.63    0.11
   3  18  -1    9.08    0.43
  -3  18   1    9.20    0.40
  -3  18   1    8.87    0.40
   3 -18  -1    8.54    0.40
   3 -18  -1    9.30    0.43
  -3 -18   1    8.99    0.39
  -3  18   0    0.58    0.12
   3  18   0    0.54    0.11
  -3  18   0    0.39    0.11
   3  18   0    0.51    0.13
  -3 -18   0    0.53    0.10
   3 -18   0    0.45    0.10
   3  18   1   18.11    0.72
  -3  18  -1   18.94    0.73
   3  18   1   19.40    0.74
  -3  18  -1   18.75    0.71
   3  18   2    0.29    0.12
   3  18   2    0.48    0.12
  -3  18  -2    0.23    0.11
  -3  18  -2    0.30    0.10
   3 -18   2    0.22    0.09
  -3  18  -3    2.41    0.22
   3  18   3    2.43    0.22
  -3  18  -3    2.18    0.18
   3  18   3    2.23    0.22
   3 -18   3    2.12    0.20
   3  18   4   39.41    1.39
   3  18   4   38.52    1.39
  -3  18  -4   39.65    1.39
   3 -18   4   38.61    1.41
   3  18   5    1.40    0.18
  -3  18  -5    1.49    0.18
   3 -18   5    1.21    0.14
  -3 -18  -5    1.34    0.16
   3  18   6   12.79    0.56
  -3  18  -6   12.72    0.55
  -3 -18  -6   12.78    0.58
   3 -18   6   12.86    0.53
  -3  18  -7   19.94    0.76
   3  18   7   18.94    0.77
  -3  18  -7   20.37    0.73
   3 -18   7   19.07    0.75
  -3 -18  -7   20.61    0.84
  -3  18  -8    1.37    0.14
  -3  18  -8    1.24    0.15
  -3  18  -8    1.29    0.15
  -3 -18  -8    1.30    0.16
  -3  18  -9    0.40    0.10
  -3  18  -9    0.76    0.13
   3  18   9    0.64    0.12
  -3  18  -9    0.72    0.11
  -3 -18  -9    0.50    0.12
   3  18  10    0.12    0.09
  -3  18 -10    0.06    0.09
  -3  18 -10    0.09    0.08
  -3 -18 -10    0.07    0.09
  -3  18 -11    1.43    0.13
   3  18  11    1.81    0.15
  -3  18 -11    1.53    0.12
  -3 -18 -11    1.66    0.15
   3  19 -11    0.21    0.08
   3  19 -11    0.21    0.06
  -3  19  11    0.13    0.06
   3 -19 -11    0.21    0.08
   3  19 -10    4.64    0.22
   3  19 -10    4.75    0.24
   3 -19 -10    5.34    0.27
  -3 -19  10    5.03    0.24
   3  19  -9   10.61    0.41
   3  19  -9   11.04    0.44
   3 -19  -9   11.42    0.50
  -3 -19   9   10.83    0.45
   3  19  -8    3.36    0.22
   3  19  -8    3.25    0.20
   3 -19  -8    3.12    0.24
  -3 -19   8    3.64    0.22
   3  19  -7    3.00    0.21
   3  19  -7    2.29    0.19
   3  19  -7    2.41    0.21
  -3 -19   7    2.58    0.21
   3 -19  -7    2.82    0.22
  -3  19   6   11.84    0.50
   3  19  -6   11.53    0.45
   3  19  -6   11.95    0.48
   3  19  -6   11.59    0.50
   3 -19  -6   11.80    0.54
  -3 -19   6   11.73    0.50
   3  19  -5    0.41    0.10
   3  19  -5    0.17    0.11
   3  19  -5    0.59    0.13
  -3  19   5    0.44    0.12
  -3 -19   5    0.24    0.10
   3 -19  -5    0.32    0.11
   3 -19  -5    0.32    0.11
   3  19  -4   21.26    0.78
  -3  19   4   22.19    0.81
   3  19  -4   21.29    0.73
   3  19  -4   20.96    0.82
   3 -19  -4   20.45    0.88
  -3 -19   4   21.41    0.81
   3 -19  -4   21.08    0.82
   3  19  -3    0.60    0.13
  -3  19   3    0.61    0.12
   3  19  -3    1.00    0.13
   3  19  -3    0.86    0.11
  -3 -19   3    0.62    0.11
   3 -19  -3    0.48    0.12
   3  19  -2    3.09    0.25
  -3  19   2    3.39    0.23
   3 -19  -2    3.17    0.23
   3 -19  -2    3.03    0.24
  -3 -19   2    3.09    0.21
   3  19  -1   18.22    0.71
  -3  19   1   17.82    0.69
  -3  19   1   17.75    0.69
  -3 -19   1   17.59    0.69
   3 -19  -1   17.81    0.72
   3 -19  -1   17.73    0.70
  -3  19   0   54.25    1.86
  -3  19   0   54.49    1.84
   3  19   0   55.18    1.89
   3  19   0   51.02    1.84
  -3 -19   0   55.16    1.91
   3 -19   0   54.54    1.92
   3  19   1   46.38    1.64
  -3  19  -1   46.94    1.60
  -3  19  -1   47.55    1.63
   3  19   1   46.15    1.61
   3 -19   1   46.01    1.67
  -3  19  -2   28.65    1.02
   3  19   2   27.24    1.01
   3  19   2   28.78    1.03
  -3  19  -2   26.37    0.99
   3 -19   2   27.29    1.03
   3  19   3    5.56    0.31
   3  19   3    5.23    0.32
  -3  19  -3    5.11    0.31
   3 -19   3    5.28    0.29
   3  19   4    2.87    0.24
  -3  19  -4    2.69    0.24
   3  19   4    2.66    0.23
   3 -19   4    3.04    0.22
  -3  19  -5    0.13    0.12
   3  19   5    0.19    0.11
  -3 -19  -5    0.06    0.09
   3 -19   5    0.05    0.09
   3  19   6    7.48    0.38
  -3  19  -6    7.05    0.37
   3 -19   6    7.07    0.35
  -3 -19  -6    7.73    0.39
  -3  19  -7    7.00    0.33
  -3  19  -7    7.25    0.35
   3 -19   7    6.67    0.33
  -3 -19  -7    7.46    0.38
  -3  19  -8    4.70    0.26
  -3  19  -8    4.88    0.28
  -3 -19  -8    5.72    0.30
  -3  19  -9    4.01    0.23
   3  19   9    4.35    0.24
  -3 -19  -9    4.59    0.26
   3  19  10    6.06    0.28
  -3  19 -10    5.85    0.24
  -3  19 -10    5.77    0.26
  -3 -19 -10    6.27    0.30
  -3  19 -11    1.65    0.13
   3  19  11    1.89    0.14
  -3 -19 -11    2.06    0.14
   3 -20 -11    0.07    0.06
   3  20 -10    0.00    0.06
   3  20 -10    0.24    0.08
  -3 -20  10    0.06    0.06
   3 -20 -10    0.09    0.07
   3  20  -9    8.91    0.36
   3  20  -9    8.46    0.33
   3 -20  -9    9.10    0.41
  -3 -20   9    8.77    0.37
   3  20  -8    6.51    0.28
   3  20  -8    6.75    0.31
  -3 -20   8    6.97    0.32
   3 -20  -8    6.60    0.34
   3  20  -7    0.75    0.12
   3  20  -7    0.78    0.12
   3  20  -7    0.78    0.11
  -3 -20   7    0.87    0.12
   3 -20  -7    0.67    0.12
   3  20  -6    1.56    0.16
   3  20  -6    1.56    0.17
   3  20  -6    1.59    0.14
   3 -20  -6    1.77    0.18
  -3 -20   6    1.74    0.16
   3  20  -5   27.02    0.93
   3  20  -5   27.69    0.98
  -3  20   5   27.82    1.01
   3  20  -5   28.71    1.03
   3 -20  -5   27.62    1.12
  -3 -20   5   27.73    1.03
   3 -20  -5   27.83    1.03
   3  20  -4   10.34    0.42
  -3  20   4    9.74    0.44
   3  20  -4   10.33    0.46
   3  20  -4    9.87    0.39
   3 -20  -4    9.22    0.45
  -3 -20   4    9.89    0.43
   3 -20  -4    9.85    0.44
   3  20  -3    0.24    0.11
  -3  20   3    0.23    0.11
  -3 -20   3    0.24    0.09
   3 -20  -3    0.29    0.10
   3  20  -2   23.44    0.88
  -3  20   2   22.91    0.85
   3 -20  -2   22.56    0.87
  -3 -20   2   22.87    0.86
   3  20  -1    0.06    0.11
  -3  20   1   -0.01    0.09
  -3  20   1    0.18    0.10
  -3 -20   1    0.06    0.08
   3 -20  -1    0.09    0.09
  -3  20   0    9.63    0.41
   3  20   0    8.88    0.41
  -3  20   0    9.46    0.43
   3  20   0    9.66    0.44
   3 -20   0    8.76    0.41
  -3 -20   0    9.08    0.41
   3  20   1    9.37    0.43
  -3  20  -1   10.35    0.45
   3  20   1    9.55    0.46
  -3  20  -1    9.58    0.43
   3 -20   1   10.35    0.44
  -3  20  -2   26.08    0.95
   3  20   2   25.70    0.97
  -3  20  -2   26.77    0.98
   3  20   2   26.14    0.99
   3 -20   2   27.41    0.99
  -3  20  -3    0.31    0.12
   3  20   3    0.27    0.12
   3  20   3    0.34    0.11
   3 -20   3    0.24    0.10
   3  20   4    1.36    0.17
   3  20   4    1.64    0.18
  -3  20  -4    1.76    0.19
   3 -20   4    1.71    0.16
  -3  20  -5   14.38    0.59
   3  20   5   13.44    0.59
   3 -20   5   14.82    0.58
  -3 -20  -5   14.60    0.63
  -3  20  -6   14.18    0.58
  -3 -20  -6   14.50    0.63
   3 -20   6   14.02    0.57
  -3  20  -7    0.35    0.11
  -3 -20  -7    0.28    0.11
   3 -20   7    0.28    0.09
   3  20   8    2.11    0.18
  -3  20  -8    2.29    0.17
  -3 -20  -8    2.27    0.20
  -3  20  -9    2.96    0.18
   3  20   9    3.05    0.19
  -3 -20  -9    2.98    0.20
   3  20  10    4.77    0.22
  -3  20 -10    4.06    0.20
  -3 -20 -10    5.15    0.24
   3  21 -10    1.13    0.10
   3 -21 -10    1.41    0.12
   3  21  -9    3.42    0.17
   3  21  -9    3.57    0.19
   3 -21  -9    4.01    0.21
  -3 -21   9    3.43    0.19
   3  21  -8   10.93    0.43
   3  21  -8   11.06    0.40
   3 -21  -8   11.44    0.49
  -3 -21   8   11.27    0.45
   3  21  -7    1.05    0.11
   3  21  -7    1.00    0.12
   3 -21  -7    1.23    0.14
  -3 -21   7    1.06    0.12
   3  21  -6    0.93    0.13
   3  21  -6    0.81    0.11
   3  21  -6    0.81    0.12
   3 -21  -6    1.10    0.14
  -3 -21   6    0.97    0.12
   3  21  -5    3.04    0.23
   3  21  -5    2.87    0.19
  -3 -21   5    3.07    0.22
   3 -21  -5    2.59    0.21
   3 -21  -5    2.95    0.20
  -3  21   4    8.71    0.41
   3  21  -4    9.30    0.43
  -3 -21   4    9.83    0.42
   3 -21  -4    9.28    0.41
  -3  21   3    2.05    0.19
   3  21  -3    2.63    0.23
   3 -21  -3    2.10    0.18
  -3 -21   3    2.00    0.19
   3  21  -2   15.71    0.65
  -3  21   2   15.52    0.62
   3 -21  -2   15.65    0.63
  -3 -21   2   15.69    0.62
  -3  21   1   42.75    1.53
  -3  21   1   44.01    1.55
   3  21  -1   45.46    1.57
  -3 -21   1   45.31    1.58
   3 -21  -1   44.89    1.60
  -3  21   0    3.80    0.25
  -3  21   0    3.23    0.23
   3  21   0    3.74    0.27
   3 -21   0    3.41    0.24
  -3 -21   0    3.39    0.22
   3  21   1   24.20    0.91
   3  21   1   23.39    0.89
  -3  21  -1   25.28    0.91
  -3  21  -1   23.12    0.88
   3 -21   1   25.06    0.92
   3  21   2   12.89    0.55
  -3  21  -2   13.02    0.54
  -3  21  -2   13.92    0.57
   3  21   2   13.97    0.58
   3 -21   2   14.33    0.57
   3  21   3    0.24    0.10
   3  21   3    0.15    0.10
  -3  21  -3    0.17    0.11
   3 -21   3    0.15    0.10
  -3  21  -4    0.76    0.14
   3 -21   4    1.03    0.14
  -3 -21  -4    1.22    0.15
  -3  21  -5   10.98    0.49
  -3 -21  -5   12.05    0.53
   3 -21   5   11.59    0.48
  -3  21  -6    1.15    0.15
   3 -21   6    1.07    0.13
  -3 -21  -6    1.19    0.14
   3  21   7    0.04    0.08
  -3 -21  -7    0.04    0.09
   3 -21   7    0.08    0.08
   3  21   8    0.74    0.10
  -3 -21  -8    0.83    0.12
   3  21   9   15.26    0.58
  -3 -21  -9   15.77    0.64
   3  21  10    0.16    0.06
  -3 -21 -10    0.17    0.07
   3  22  -9    0.53    0.06
   3 -22  -9    0.48    0.08
  -3 -22   9    0.50    0.07
   3  22  -8    5.11    0.21
  -3 -22   8    4.94    0.24
   3 -22  -8    5.20    0.26
   3  22  -7   11.90    0.43
   3 -22  -7   12.04    0.52
  -3 -22   7   12.30    0.48
   3  22  -6    5.12    0.23
  -3 -22   6    5.16    0.27
   3 -22  -6    5.38    0.28
   3  22  -5    7.28    0.35
  -3 -22   5    7.46    0.33
   3 -22  -5    7.01    0.32
   3 -22  -5    6.88    0.35
   3  22  -4    0.24    0.11
  -3 -22   4    0.36    0.10
   3 -22  -4    0.32    0.10
   3  22  -3   19.38    0.74
   3 -22  -3   18.35    0.72
  -3 -22   3   18.79    0.72
   3  22  -2   11.61    0.52
   3 -22  -2   12.25    0.51
  -3 -22   2   12.20    0.50
  -3  22   1   10.36    0.44
   3  22  -1   10.56    0.46
  -3  22   1    9.46    0.43
   3 -22  -1   10.10    0.44
  -3 -22   1    9.91    0.43
  -3  22   0    9.78    0.43
   3  22   0   10.16    0.45
  -3  22   0    8.83    0.41
  -3 -22   0    9.33    0.41
   3 -22   0    9.43    0.42
  -3  22  -1    0.48    0.12
   3  22   1    0.45    0.12
   3 -22   1    0.42    0.11
  -3  22  -2   10.77    0.47
   3  22   2   10.27    0.47
   3 -22   2   11.38    0.47
  -3  22  -3   11.08    0.49
   3  22   3   11.56    0.49
   3 -22   3   11.97    0.49
  -3 -22  -3   11.56    0.52
  -3  22  -4    4.74    0.28
   3 -22   4    4.71    0.27
  -3 -22  -4    4.76    0.28
  -3  22  -5   10.17    0.44
   3 -22   5   10.36    0.44
  -3 -22  -5   10.31    0.47
  -3  22  -6    1.68    0.17
   3 -22   6    1.75    0.16
  -3 -22  -6    1.83    0.18
   3  22   7    3.18    0.19
  -3 -22  -7    3.04    0.20
   3 -22   7    2.88    0.18
   3  22   8    8.35    0.34
  -3 -22  -8    8.00    0.36
   3  22   9    0.06    0.06
  -3 -22  -9    0.07    0.06
   3 -23  -8    3.22    0.18
  -3 -23   8    2.98    0.16
  -3 -23   7    5.90    0.26
   3 -23  -7    5.76    0.28
  -3 -23   6    2.40    0.17
   3 -23  -6    2.32    0.17
  -3 -23   5    0.39    0.09
   3  23  -4    1.10    0.14
  -3 -23   4    0.93    0.12
   3 -23  -4    1.21    0.13
   3  23  -3    3.88    0.25
   3 -23  -3    3.37    0.22
  -3 -23   3    3.51    0.22
   3  23  -2    9.77    0.44
  -3 -23   2    9.79    0.42
   3 -23  -2    9.84    0.42
   3  23  -1    4.89    0.28
   3 -23  -1    4.26    0.26
  -3 -23   1    4.13    0.24
   3  23   0   44.28    1.53
  -3  23   0   42.65    1.51
   3 -23   0   45.80    1.56
  -3 -23   0   42.19    1.54
   3  23   1    0.65    0.13
  -3  23  -1    0.36    0.11
   3 -23   1    0.59    0.11
  -3  23  -2    0.12    0.09
   3  23   2    0.15    0.09
   3 -23   2    0.14    0.10
  -3 -23  -2    0.15    0.08
   3  23   3    8.29    0.37
  -3  23  -3    7.91    0.38
  -3 -23  -3    8.18    0.39
   3 -23   3    8.90    0.38
  -3  23  -4    0.99    0.14
  -3 -23  -4    1.11    0.13
   3 -23   4    0.96    0.12
   3  23   5    0.41    0.09
  -3 -23  -5    0.57    0.10
   3 -23   5    0.43    0.10
   3  23   6    0.99    0.11
   3 -23   6    0.90    0.11
  -3 -23  -6    1.03    0.12
   3  23   7    1.62    0.13
   3 -23   7    1.36    0.13
  -3 -23  -7    1.54    0.14
   3  23   8    6.11    0.26
  -3 -23  -8    6.49    0.29
  -3 -24   7    8.03    0.32
  -3 -24   6    6.48    0.28
  -3 -24   5    0.17    0.08
   3 -24  -4    7.19    0.31
  -3 -24   4    7.34    0.32
   3 -24  -3   14.41    0.56
  -3 -24   3   14.69    0.56
   3  24  -2    0.36    0.10
  -3 -24   2    0.22    0.08
   3 -24  -2    0.29    0.09
   3  24  -1   10.89    0.45
   3 -24  -1   10.31    0.44
  -3 -24   1   10.41    0.43
   3  24   0    0.14    0.09
  -3 -24   0   -0.03    0.07
   3 -24   0   -0.01    0.08
   3  24   1   17.91    0.68
  -3  24  -1   17.58    0.68
   3 -24   1   18.37    0.69
  -3 -24  -1   18.01    0.73
  -3 -24  -2    1.02    0.12
   3 -24   2    0.91    0.12
   3 -24   3    0.12    0.08
  -3 -24  -3    0.09    0.08
  -3 -24  -4    7.18    0.34
   3 -24   4    7.28    0.32
   3  24   5    0.02    0.06
  -3 -24  -5    0.06    0.07
   3 -24   5    0.03    0.07
   3  24   6   11.20    0.42
  -3 -24  -6   11.54    0.47
   3 -24   6   10.96    0.43
   3  24   7    7.26    0.29
  -3 -24  -7    7.44    0.32
  -3 -25   6    0.13    0.06
  -3 -25   5    0.02    0.06
   3 -25  -4    4.47    0.21
  -3 -25   4    4.81    0.23
  -3 -25   3    2.68    0.17
   3 -25  -3    2.89    0.17
  -3 -25   2    6.08    0.28
   3 -25  -2    6.21    0.28
   3 -25  -1   15.13    0.57
  -3 -25   1   14.33    0.55
   3 -25   0   13.91    0.54
   3 -25   1   10.27    0.41
  -3 -25  -1    9.51    0.42
   3 -25   2    4.29    0.22
  -3 -25  -2    4.13    0.22
  -3 -25  -3    0.11    0.07
   3 -25   3    0.02    0.07
   3 -25   4    1.21    0.11
  -3 -25  -4    1.24    0.11
  -3 -25  -5    0.56    0.08
   3 -25   5    0.49    0.08
  -3 -25  -6    3.76    0.19
  -3 -26   4   15.52    0.57
   3 -26  -3    3.78    0.18
  -3 -26   3    3.76    0.18
  -3 -26   2   22.75    0.82
   3 -26  -2   23.28    0.82
   3 -26  -1    4.32    0.21
  -3 -26   1    4.17    0.20
   3 -26   0    1.70    0.14
   3 -26   1    1.51    0.13
   3 -26   2    9.07    0.35
  -3 -26  -2    8.39    0.37
  -3 -26  -3    0.20    0.06
   3 -26   3    0.08    0.06
  -3 -26  -4    0.24    0.06
   3 -26   4    0.24    0.06
   3 -27   0    5.52    0.24
   3 -27   1    8.93    0.35
   3 -27   2    0.75    0.08
   4   0 -16    2.71    0.17
   4   0 -15    0.02    0.10
   4   0 -14    4.32    0.27
   4   0 -13    0.06    0.11
   4   0 -12    9.72    0.45
   4   0 -12    9.11    0.42
   4   0 -11   -0.05    0.09
   4   0 -11    0.01    0.09
   4   0 -10   31.67    1.26
  -4   0  10   33.23    1.05
   4   0 -10   30.16    1.12
  -4   0   9    0.20    0.07
   4   0  -9    0.10    0.07
  -4   0   8   91.64    2.79
   4   0  -8   89.77    3.06
   4   0  -7    0.00    0.06
  -4   0   7   -0.04    0.06
  -4   0   7    0.11    0.05
   4   0  -6  132.93    4.48
  -4   0   6  137.45    4.08
  -4   0   6  131.85    4.18
  -4   0   5    0.07    0.04
  -4   0   5    0.13    0.05
   4   0  -5    0.05    0.05
  -4   0   4  225.78    6.97
  -4   0   4  226.25    6.97
   4   0  -4  227.35    7.51
  -4   0   3    0.02    0.03
  -4   0   3    0.09    0.04
   4   0  -3    0.01    0.04
  -4   0   2   89.47    2.70
   4   0  -2   83.10    2.67
   4   0  -2   90.85    2.93
  -4   0   2   88.72    2.70
   4   0  -2   86.86    3.55
   4   0  -1   -0.02    0.05
   4   0  -1    0.00    0.07
   4   0  -1   -0.11    0.12
   4   0  -1   -0.10    0.04
   4   0   0  430.62   13.55
  -4   0   0  382.52   16.19
   4   0   0  416.00   12.37
   4   0   0  410.93   13.62
   4   0   1    0.13    0.05
   4   0   1    0.11    0.04
  -4   0  -1    0.16    0.03
  -4   0  -1    0.08    0.03
  -4   0  -2   60.29    1.85
   4   0   2   58.39    1.82
  -4   0  -2   60.10    1.85
   4   0   3    0.07    0.04
   4   0   3    0.00    0.04
  -4   0  -3   -0.02    0.04
  -4   0  -3    0.06    0.04
   4   0   3   -0.02    0.04
   4   0   4   56.84    1.88
   4   0   4   56.63    1.77
  -4   0  -4   58.26    1.81
  -4   0  -5    0.55    0.09
   4   0   5    0.48    0.07
   4   0   5    0.39    0.07
   4   0   6  134.26    4.38
   4   0   6  135.04    3.88
   4   0   6  136.88    4.12
  -4   0  -6  132.71    4.22
   4   0   7    0.26    0.07
   4   0   7    0.25    0.07
   4   0   7    0.30    0.06
   4   0   7    0.38    0.09
   4   0   8   66.72    2.10
   4   0   8   66.72    1.87
   4   0   9    0.08    0.09
   4   0  10    0.87    0.12
  -4   0 -10    1.02    0.12
  -4   0 -10    0.83    0.12
   4   0  10    0.88    0.13
  -4   0 -11    0.03    0.09
  -4   0 -11   -0.06    0.09
   4   0  11    0.11    0.10
  -4   0 -12    0.99    0.14
  -4   0 -12    0.94    0.13
  -4   0 -12    1.10    0.17
  -4   0 -13   -0.07    0.12
  -4   0 -13    0.01    0.09
  -4   0 -13   -0.12    0.14
  -4   0 -14    1.61    0.17
  -4   0 -14    1.47    0.14
  -4   0 -15    0.07    0.07
   4   1 -16    0.28    0.08
   4  -1 -16    0.24    0.08
   4   1 -15    2.40    0.19
   4  -1 -15    2.39    0.20
   4   1 -14    0.58    0.13
   4  -1 -14    0.73    0.14
   4   1 -13    0.13    0.11
   4  -1 -13    0.27    0.12
   4   1 -12    9.57    0.42
   4  -1 -12    9.76    0.47
   4  -1 -12    9.75    0.43
   4   1 -11   17.74    0.74
   4   1 -11   17.52    0.66
   4  -1 -11   17.58    0.74
  -4  -1  11   16.94    0.62
   4  -1 -11   17.34    0.67
   4   1 -10   21.93    0.90
   4   1 -10   21.36    0.79
  -4  -1  10   22.23    0.75
   4  -1 -10   21.56    0.80
   4  -1 -10   22.52    0.91
  -4   1   9    0.47    0.09
   4   1  -9    0.44    0.09
  -4  -1   9    0.73    0.10
   4  -1  -9    0.61    0.10
   4   1  -8   11.33    0.45
  -4   1   8   11.43    0.41
  -4  -1   8   11.64    0.41
   4  -1  -8   11.07    0.45
   4   1  -7   30.50    1.05
  -4   1   7   31.01    0.95
  -4   1   7   30.00    1.02
   4  -1  -7   29.91    1.05
  -4  -1   7   29.53    0.96
  -4  -1   7   29.05    1.02
  -4   1   6    2.61    0.16
  -4   1   6    2.68    0.13
   4   1  -6    2.61    0.15
   4  -1  -6    2.68    0.12
  -4  -1   6    2.61    0.16
   4  -1  -6    2.62    0.15
  -4  -1   6    2.81    0.14
  -4   1   5    2.09    0.13
   4   1  -5    2.01    0.13
  -4   1   5    2.24    0.11
  -4  -1   5    2.15    0.13
  -4  -1   5    2.14    0.11
   4  -1  -5    2.08    0.13
  -4   1   4   38.24    1.18
  -4   1   4   38.00    1.22
  -4   1   4   39.67    1.22
   4   1  -4   38.81    1.31
   4  -1  -4   38.66    1.31
  -4  -1   4   37.15    1.22
  -4  -1   4   37.87    1.22
   4   1  -3   87.93    2.90
  -4   1   3   87.28    2.69
  -4   1   3   86.76    2.69
  -4  -1   3   84.55    2.69
  -4  -1   3   88.87    2.69
   4  -1  -3   85.54    2.90
   4   1  -2  149.24    6.01
   4   1  -2  140.19    4.55
   4   1  -2  153.94    4.99
  -4   1   2  148.94    4.62
  -4   1   2  161.31    4.62
   4  -1  -2  151.35    4.99
   4  -1  -2  145.35    5.99
  -4  -1   2  151.06    4.61
   4   1  -1  632.68   19.48
   4   1  -1  576.87   23.19
   4   1  -1  549.36   17.72
   4   1  -1  573.67   19.51
   4  -1  -1  574.21   19.52
   4  -1  -1  612.51   19.50
   4  -1  -1  594.49   23.17
   4   1   0    6.00    0.24
   4   1   0    6.41    0.23
  -4   1   0    6.71    0.33
   4   1   0    6.25    0.22
   4  -1   0    6.39    0.25
  -4  -1   0    5.17    0.34
   4  -1   0    6.04    0.22
   4   1   1   13.63    0.44
  -4   1  -1   14.34    0.43
   4   1   1   13.47    0.47
  -4   1  -1   13.30    0.44
   4  -1   1   12.70    0.48
  -4  -1  -1   13.49    0.43
  -4  -1  -1   12.56    0.62
   4  -1   1   13.20    0.43
  -4   1  -2   26.85    0.88
  -4   1  -2   28.29    0.88
   4   1   2   27.61    0.86
   4  -1   2   26.80    0.86
   4  -1   2   28.35    0.95
  -4  -1  -2   27.39    0.88
  -4  -1  -2   27.97    0.88
   4   1   3   52.70    1.63
   4   1   3   51.28    1.65
   4   1   3   52.93    1.73
  -4   1  -3   51.99    1.66
  -4   1  -3   55.58    1.66
  -4  -1  -3   52.84    1.66
  -4  -1  -3   54.82    1.66
   4  -1   3   52.76    1.62
   4  -1   3   51.52    1.73
   4  -1   3   51.51    1.66
   4   1   4   19.17    0.65
  -4   1  -4   19.63    0.65
   4   1   4   18.41    0.62
   4  -1   4   18.86    0.62
   4  -1   4   18.50    0.65
  -4  -1  -4   19.27    0.64
   4   1   5    8.28    0.30
  -4   1  -5    8.28    0.33
   4   1   5    8.17    0.31
   4  -1   5    7.65    0.30
   4  -1   5    7.60    0.31
  -4  -1  -5    8.32    0.33
   4   1   6   28.40    0.86
   4   1   6   30.21    0.93
  -4   1  -6   28.26    0.98
   4   1   6   28.51    0.98
   4  -1   6   29.03    1.00
   4  -1   6   28.28    0.98
   4  -1   6   28.50    0.86
  -4  -1  -6   28.29    0.98
   4  -1   6   29.20    0.93
   4   1   7   29.27    0.94
   4   1   7   28.94    0.98
   4   1   7   29.10    0.99
   4  -1   7   29.00    0.99
   4  -1   7   27.53    0.98
   4  -1   7   27.94    0.94
   4   1   8    3.01    0.19
   4   1   8    2.64    0.12
   4  -1   8    2.62    0.12
   4  -1   8    2.88    0.19
   4   1   9   47.74    1.51
   4  -1   9   45.93    1.51
   4   1  10    1.56    0.17
   4   1  10    1.79    0.15
  -4   1 -10    1.76    0.14
  -4   1 -10    1.54    0.15
  -4  -1 -10    1.93    0.16
   4  -1  10    1.60    0.17
  -4  -1 -10    1.53    0.14
   4  -1  10    1.79    0.16
  -4   1 -11    1.16    0.13
  -4   1 -11    0.71    0.13
   4   1  11    1.15    0.15
   4  -1  11    1.03    0.15
  -4  -1 -11    1.00    0.13
  -4  -1 -11    1.00    0.14
  -4   1 -12    4.40    0.25
  -4   1 -12    5.13    0.31
  -4   1 -12    5.30    0.29
  -4  -1 -12    4.23    0.25
  -4  -1 -12    5.13    0.29
  -4   1 -13    2.26    0.19
  -4   1 -13    2.43    0.20
[truncated: 1,164,431 more chars]
